# Supplementary material for: RNA sequencing-based exploration of the effects of far-red light on microRNAs involved in the shade-avoidance response of D. officinale
Source: PeerJ journal article supplement (doi:10.7717/peerj.15001), 2023-03-20
Supplement: Table_S1.pdf [file Table_S1.pdf]

Table S1 The power analysis in *D. officinale* under different light treatments

| miRNAs        | CK1 TPM  | CK2 TPM  | CK3 TPM  | FR2-1 TPM | FR2-2 TPM | FR2-3 TPM | FR8-1 TPM | FR8-2 TPM | FR8-3 TPM | CK1_CK2_2_FR2-3 vs FR2-1_FR2-2_FR2-3 power value | FR2-1_FR2-2_FR2-3 vs FR8-1_FR8-2_FR8-3 power value | CK1_CK2_8-1_FR8-2_FR8-3 vs FR2-1_FR2-2_FR2-3 power value |
|---------------|----------|----------|----------|-----------|-----------|-----------|-----------|-----------|-----------|--------------------------------------------------|----------------------------------------------------|----------------------------------------------------------|
| hbr-miR6485   | 34.79    | 0.00     | 16.34    | 19.55     | 11.25     | 9.41      | 13.76     | 44.44     | 30.89     | 0.06                                             | 0.30                                               | 0.20                                                     |
| osa-miR5523   | 0.00     | 6.46     | 0.00     | 3.26      | 30.01     | 12.55     | 0.00      | 3.70      | 0.00      | 0.37                                             | 0.42                                               | 0.05                                                     |
| peu-miR2916   | 0.00     | 0.00     | 0.00     | 0.00      | 0.00      | 3.14      | 3.44      | 0.00      | 0.00      | 0.14                                             | 0.05                                               | 0.16                                                     |
| rgl-miR5141   | 8.70     | 32.30    | 9.80     | 16.29     | 41.26     | 12.55     | 17.19     | 7.41      | 0.00      | 0.09                                             | 0.30                                               | 0.13                                                     |
| novel_miR_1   | 1113.30  | 1369.70  | 901.74   | 811.41    | 1046.44   | 1041.24   | 1017.92   | 1103.69   | 1008.98   | 0.25                                             | 0.09                                               | 0.10                                                     |
| novel_miR_10  | 162.36   | 122.76   | 163.36   | 175.97    | 243.79    | 200.72    | 141.00    | 125.92    | 102.96    | 0.37                                             | 0.65                                               | 0.11                                                     |
| novel_miR_100 | 78.28    | 90.45    | 124.15   | 156.42    | 198.79    | 128.59    | 141.00    | 103.70    | 72.07     | 0.48                                             | 0.39                                               | 0.06                                                     |
| novel_miR_101 | 565.35   | 1285.71  | 522.75   | 661.51    | 877.66    | 856.20    | 787.51    | 970.36    | 813.36    | 0.05                                             | 0.06                                               | 0.06                                                     |
| novel_miR_102 | 391.40   | 458.72   | 411.66   | 684.32    | 1087.70   | 668.03    | 663.71    | 618.51    | 730.99    | 0.62                                             | 0.13                                               | 0.30                                                     |
| novel_miR_103 | 1185.78  | 1653.98  | 1146.78  | 2310.39   | 2587.97   | 2524.70   | 2259.36   | 1996.27   | 2069.43   | 0.75                                             | 0.13                                               | 0.43                                                     |
| miR447c_3p_3  | 179.75   | 290.74   | 251.57   | 293.28    | 502.59    | 354.40    | 364.52    | 300.00    | 298.58    | 0.50                                             | 0.14                                               | 0.20                                                     |
| novel_miR_105 | 205.84   | 161.52   | 150.29   | 348.68    | 341.31    | 254.04    | 151.31    | 207.40    | 205.91    | 0.63                                             | 0.54                                               | 0.06                                                     |
| novel_miR_106 | 556.65   | 710.70   | 575.02   | 589.82    | 697.63    | 599.03    | 536.47    | 581.47    | 494.19    | 0.06                                             | 0.36                                               | 0.27                                                     |
| novel_miR_107 | 385.60   | 542.71   | 280.98   | 482.28    | 502.59    | 470.44    | 402.35    | 544.44    | 514.78    | 0.21                                             | 0.05                                               | 0.22                                                     |
| novel_miR_108 | 136.26   | 174.44   | 101.28   | 195.52    | 210.04    | 213.27    | 196.02    | 185.18    | 133.84    | 0.58                                             | 0.19                                               | 0.19                                                     |
| novel_miR_109 | 637.83   | 936.83   | 578.29   | 700.61    | 1005.18   | 1198.06   | 863.17    | 907.39    | 648.63    | 0.32                                             | 0.16                                               | 0.08                                                     |
| novel_miR_11  | 5.80     | 6.46     | 9.80     | 19.55     | 22.50     | 37.64     | 27.51     | 7.41      | 10.30     | 0.56                                             | 0.24                                               | 0.14                                                     |
| novel_miR_110 | 423.29   | 452.26   | 437.80   | 668.03    | 480.09    | 551.98    | 649.95    | 577.77    | 535.38    | 0.42                                             | 0.06                                               | 0.53                                                     |
| miR5208a      | 603.04   | 923.90   | 545.62   | 707.13    | 1233.98   | 1213.74   | 1107.33   | 1133.32   | 772.18    | 0.38                                             | 0.06                                               | 0.30                                                     |
| miR399b_1     | 26794.62 | 28815.46 | 37833.86 | 9235.06   | 9673.02   | 11550.89  | 29729.36  | 38232.77  | 36868.87  | 0.56                                             | 0.70                                               | 0.07                                                     |
| novel_miR_113 | 142.06   | 271.36   | 94.75    | 241.14    | 262.55    | 338.72    | 192.58    | 188.89    | 247.10    | 0.46                                             | 0.22                                               | 0.10                                                     |
| novel_miR_114 | 165.26   | 245.51   | 137.22   | 149.90    | 258.80    | 275.99    | 175.38    | 218.52    | 154.44    | 0.19                                             | 0.19                                               | 0.05                                                     |
| novel_miR_115 | 495.77   | 704.23   | 450.87   | 355.19    | 476.34    | 639.80    | 636.20    | 677.77    | 628.04    | 0.09                                             | 0.36                                               | 0.17                                                     |
| miR5595a_1    | 7969.96  | 9251.96  | 7994.77  | 6628.13   | 7471.36   | 9596.99   | 7610.30   | 7907.29   | 7793.84   | 0.11                                             | 0.05                                               | 0.14                                                     |

|               |          |          |          |          |          |          |          |          |          |      |      |      |
|---------------|----------|----------|----------|----------|----------|----------|----------|----------|----------|------|------|------|
| miR3444a_5p   | 391.40   | 762.38   | 251.57   | 309.57   | 506.34   | 567.67   | 433.30   | 370.36   | 463.31   | 0.05 | 0.06 | 0.07 |
| novel_miR_118 | 55.09    | 83.99    | 78.41    | 182.49   | 165.03   | 78.41    | 68.78    | 170.37   | 72.07    | 0.39 | 0.15 | 0.12 |
| novel_miR_119 | 391.40   | 497.49   | 264.64   | 479.02   | 708.88   | 489.26   | 646.51   | 640.73   | 483.90   | 0.34 | 0.06 | 0.45 |
| novel_miR_12  | 878.46   | 1673.36  | 771.05   | 1111.21  | 1597.79  | 1198.06  | 1358.37  | 1670.35  | 1441.40  | 0.11 | 0.11 | 0.29 |
| novel_miR_120 | 240.64   | 303.66   | 251.57   | 276.99   | 397.57   | 335.58   | 405.79   | 407.40   | 329.46   | 0.27 | 0.13 | 0.58 |
| novel_miR_121 | 22321.12 | 29254.80 | 18910.40 | 14113.28 | 26389.82 | 38303.28 | 36184.19 | 33836.54 | 34058.15 | 0.07 | 0.24 | 0.38 |
| miR166_2      | 7975.76  | 8114.85  | 11637.67 | 17150.36 | 14155.08 | 15279.91 | 18432.55 | 12673.89 | 13209.37 | 0.57 | 0.06 | 0.47 |
| novel_miR_123 | 107.27   | 213.21   | 120.89   | 146.64   | 198.79   | 203.86   | 220.09   | 162.96   | 175.03   | 0.19 | 0.05 | 0.22 |
| miR162_2      | 7532.18  | 9510.40  | 10304.66 | 18883.97 | 15857.89 | 12654.85 | 15984.04 | 14396.08 | 13600.61 | 0.63 | 0.07 | 0.47 |
| novel_miR_125 | 376.90   | 788.23   | 359.39   | 485.54   | 885.16   | 799.75   | 698.10   | 599.99   | 823.66   | 0.26 | 0.05 | 0.23 |
| novel_miR_126 | 3519.66  | 5692.02  | 3711.51  | 5738.51  | 6661.22  | 6586.17  | 5430.04  | 5122.15  | 4293.30  | 0.58 | 0.31 | 0.11 |
| novel_miR_127 | 556.65   | 710.70   | 575.02   | 589.82   | 697.63   | 599.03   | 536.47   | 581.47   | 494.19   | 0.06 | 0.36 | 0.27 |
| miR862_3p     | 2186.01  | 3185.21  | 1633.59  | 3731.17  | 3941.97  | 2957.50  | 2740.81  | 3785.13  | 2707.77  | 0.48 | 0.11 | 0.22 |
| novel_miR_129 | 536.36   | 956.21   | 532.55   | 570.27   | 1042.69  | 849.93   | 835.65   | 703.69   | 669.22   | 0.16 | 0.09 | 0.07 |
| novel_miR_13  | 57.98    | 58.15    | 120.89   | 159.67   | 262.55   | 147.40   | 141.00   | 129.63   | 92.66    | 0.59 | 0.27 | 0.13 |
| miR9563b_5p_3 | 144.96   | 264.90   | 156.82   | 270.47   | 408.82   | 279.13   | 261.36   | 270.37   | 226.51   | 0.55 | 0.19 | 0.17 |
| novel_miR_131 | 292.82   | 368.27   | 245.04   | 485.54   | 532.60   | 382.63   | 471.13   | 566.66   | 339.76   | 0.45 | 0.05 | 0.41 |
| miR5225a_2    | 327.61   | 542.71   | 329.98   | 664.77   | 873.91   | 599.03   | 563.98   | 522.21   | 442.71   | 0.62 | 0.31 | 0.12 |
| miR1520f_5p_1 | 1342.34  | 2209.62  | 1006.29  | 1081.88  | 1297.74  | 1292.14  | 1299.91  | 1785.16  | 1245.78  | 0.16 | 0.11 | 0.06 |
| miR6151e      | 37.69    | 122.76   | 68.61    | 156.42   | 131.27   | 147.40   | 127.24   | 74.07    | 41.18    | 0.45 | 0.41 | 0.05 |
| miR395d_3p_2  | 150.76   | 193.83   | 111.08   | 117.31   | 176.28   | 194.45   | 202.90   | 188.89   | 154.44   | 0.07 | 0.11 | 0.19 |
| novel_miR_136 | 3722.60  | 4348.16  | 4694.93  | 5777.62  | 8018.96  | 8028.85  | 6434.20  | 8296.17  | 6022.98  | 0.59 | 0.06 | 0.48 |
| miR1520f_5p_1 | 359.50   | 465.18   | 264.64   | 511.61   | 453.83   | 366.94   | 323.26   | 488.88   | 319.17   | 0.21 | 0.16 | 0.05 |
| miR167f_3     | 1629.36  | 1356.78  | 2349.10  | 2734.02  | 1477.77  | 2013.49  | 1815.74  | 1588.87  | 1945.89  | 0.13 | 0.13 | 0.05 |
| miR7504h      | 652.33   | 1589.37  | 705.71   | 469.25   | 1083.95  | 1840.99  | 962.89   | 955.54   | 792.77   | 0.07 | 0.10 | 0.06 |
| novel_miR_14  | 10022.61 | 12766.67 | 9265.70  | 14067.66 | 16367.99 | 14743.61 | 13146.94 | 12336.85 | 10336.88 | 0.63 | 0.37 | 0.10 |
| novel_miR_140 | 872.67   | 839.91   | 810.26   | 1231.78  | 836.40   | 1116.51  | 1447.78  | 1755.53  | 1441.40  | 0.12 | 0.41 | 0.72 |
| novel_miR_141 | 1954.08  | 2952.62  | 1300.33  | 2290.84  | 3544.40  | 4212.01  | 4253.93  | 3870.31  | 3572.61  | 0.32 | 0.10 | 0.57 |
| novel_miR_142 | 246.43   | 303.66   | 202.56   | 492.06   | 435.08   | 401.44   | 240.72   | 348.14   | 195.62   | 0.59 | 0.55 | 0.05 |
| miR9783       | 278.33   | 594.40   | 310.38   | 540.94   | 791.39   | 777.80   | 667.15   | 599.99   | 566.26   | 0.56 | 0.10 | 0.32 |
| miR172k       | 429.09   | 348.89   | 787.39   | 3180.46  | 1582.79  | 310.49   | 918.19   | 744.43   | 648.63   | 0.35 | 0.24 | 0.06 |
| miR8743e      | 191.35   | 374.73   | 140.49   | 270.47   | 326.31   | 244.63   | 230.41   | 314.81   | 277.98   | 0.12 | 0.05 | 0.10 |

|               |         |          |         |          |          |          |         |          |         |      |      |      |
|---------------|---------|----------|---------|----------|----------|----------|---------|----------|---------|------|------|------|
| novel_miR_146 | 771.19  | 885.14   | 722.05  | 843.99   | 847.65   | 762.11   | 622.44  | 777.77   | 782.47  | 0.07 | 0.30 | 0.18 |
| miR160g_4     | 81.18   | 64.61    | 84.95   | 94.50    | 63.76    | 97.22    | 72.22   | 70.37    | 51.48   | 0.10 | 0.38 | 0.17 |
| novel_miR_149 | 142.06  | 316.58   | 150.29  | 303.06   | 281.30   | 228.95   | 281.99  | 174.07   | 226.51  | 0.24 | 0.13 | 0.07 |
| novel_miR_15  | 426.19  | 652.55   | 362.66  | 765.79   | 825.15   | 790.34   | 821.90  | 785.17   | 761.88  | 0.59 | 0.05 | 0.58 |
| novel_miR_150 | 40.59   | 77.53    | 42.47   | 97.76    | 123.77   | 125.45   | 127.24  | 107.41   | 72.07   | 0.61 | 0.08 | 0.42 |
| miR5568g_3p   | 991.53  | 1505.38  | 833.13  | 1202.45  | 1323.99  | 1194.92  | 1217.37 | 1314.80  | 988.39  | 0.12 | 0.07 | 0.07 |
| novel_miR_152 | 2661.49 | 4038.04  | 2329.49 | 2815.49  | 4065.74  | 4469.19  | 3996.01 | 4036.98  | 4056.50 | 0.23 | 0.07 | 0.36 |
| novel_miR_153 | 307.32  | 361.81   | 421.47  | 413.85   | 525.10   | 454.76   | 632.76  | 614.81   | 494.19  | 0.21 | 0.26 | 0.68 |
| novel_miR_154 | 60.88   | 142.14   | 55.54   | 45.62    | 123.77   | 232.08   | 168.51  | 100.00   | 82.37   | 0.16 | 0.06 | 0.09 |
| novel_miR_156 | 1064.01 | 788.23   | 1519.24 | 1544.61  | 1023.94  | 1935.08  | 1265.52 | 940.73   | 988.39  | 0.24 | 0.30 | 0.05 |
| miR530a       | 95.67   | 122.76   | 104.55  | 286.76   | 228.79   | 297.95   | 230.41  | 303.70   | 216.21  | 0.68 | 0.06 | 0.56 |
| miR5291b      | 231.94  | 426.42   | 202.56  | 221.59   | 341.31   | 250.90   | 278.55  | 314.81   | 216.21  | 0.06 | 0.05 | 0.06 |
| novel_miR_159 | 649.43  | 678.39   | 676.30  | 651.73   | 483.84   | 661.75   | 433.30  | 555.55   | 391.24  | 0.12 | 0.32 | 0.61 |
| miR8552b      | 110.17  | 116.30   | 94.75   | 283.50   | 135.02   | 185.04   | 213.21  | 203.70   | 154.44  | 0.47 | 0.06 | 0.39 |
| novel_miR_160 | 7137.89 | 11558.49 | 6599.69 | 12118.98 | 13810.02 | 10202.29 | 8583.51 | 12533.15 | 8545.42 | 0.41 | 0.18 | 0.11 |
| novel_miR_161 | 150.76  | 206.75   | 212.37  | 290.02   | 255.05   | 272.86   | 199.46  | 185.18   | 185.32  | 0.60 | 0.60 | 0.05 |
| novel_miR_162 | 191.35  | 329.50   | 248.31  | 211.81   | 435.08   | 319.90   | 257.92  | 159.26   | 216.21  | 0.16 | 0.36 | 0.10 |
| miR4387e      | 78.28   | 96.91    | 120.89  | 202.04   | 168.78   | 517.48   | 220.09  | 118.52   | 133.84  | 0.44 | 0.25 | 0.08 |
| novel_miR_164 | 113.07  | 187.37   | 143.76  | 185.74   | 157.53   | 329.31   | 230.41  | 196.29   | 226.51  | 0.32 | 0.05 | 0.28 |
| novel_miR_165 | 185.55  | 316.58   | 127.42  | 316.09   | 363.82   | 310.49   | 147.87  | 211.11   | 185.32  | 0.40 | 0.56 | 0.07 |
| miR319b_1     | 2009.16 | 1918.88  | 3551.42 | 2861.11  | 2115.39  | 3434.22  | 2331.58 | 2133.30  | 2872.50 | 0.09 | 0.11 | 0.05 |
| novel_miR_167 | 200.05  | 607.32   | 284.24  | 273.73   | 738.88   | 542.57   | 388.60  | 362.96   | 226.51  | 0.17 | 0.24 | 0.06 |
| miR538c       | 565.35  | 930.36   | 640.37  | 1042.77  | 1012.68  | 1132.19  | 1327.42 | 996.28   | 1276.67 | 0.39 | 0.10 | 0.65 |
| novel_miR_169 | 171.05  | 135.68   | 212.37  | 195.52   | 101.27   | 166.22   | 244.16  | 196.29   | 216.21  | 0.08 | 0.44 | 0.25 |
| novel_miR_17  | 1609.07 | 2416.36  | 1692.40 | 1795.53  | 2062.88  | 1458.37  | 1461.54 | 2011.08  | 1585.54 | 0.08 | 0.06 | 0.13 |
| novel_miR_170 | 556.65  | 710.70   | 575.02  | 586.56   | 701.38   | 602.16   | 536.47  | 581.47   | 483.90  | 0.06 | 0.36 | 0.27 |
| novel_miR_171 | 724.81  | 1246.95  | 607.69  | 853.77   | 1226.47  | 1492.86  | 1234.57 | 1144.43  | 1153.12 | 0.29 | 0.05 | 0.27 |
| novel_miR_172 | 530.56  | 807.61   | 519.48  | 593.08   | 753.89   | 727.61   | 790.95  | 566.66   | 555.97  | 0.12 | 0.09 | 0.05 |
| novel_miR_173 | 374.00  | 762.38   | 307.11  | 351.94   | 585.11   | 1050.65  | 670.59  | 533.33   | 442.71  | 0.15 | 0.09 | 0.06 |
| novel_miR_174 | 1017.63 | 2119.16  | 797.19  | 951.53   | 1500.27  | 1568.14  | 1434.02 | 1399.98  | 1317.85 | 0.05 | 0.05 | 0.06 |
| miR474b_2     | 150.76  | 213.21   | 101.28  | 221.59   | 210.04   | 266.58   | 240.72  | 244.44   | 205.91  | 0.46 | 0.05 | 0.44 |
| novel_miR_176 | 110.17  | 161.52   | 120.89  | 172.71   | 300.05   | 439.08   | 302.62  | 177.78   | 113.25  | 0.47 | 0.21 | 0.11 |

|               |          |          |          |          |          |          |          |          |          |      |      |      |
|---------------|----------|----------|----------|----------|----------|----------|----------|----------|----------|------|------|------|
| novel_miR_177 | 803.08   | 1318.02  | 771.05   | 2215.89  | 1991.61  | 1289.01  | 1306.78  | 1933.30  | 1235.48  | 0.55 | 0.13 | 0.24 |
| novel_miR_178 | 591.44   | 956.21   | 450.87   | 459.47   | 656.37   | 1034.97  | 856.29   | 796.28   | 823.66   | 0.06 | 0.10 | 0.15 |
| novel_miR_179 | 431.98   | 704.23   | 437.80   | 798.37   | 982.68   | 602.16   | 553.66   | 640.73   | 463.31   | 0.44 | 0.37 | 0.05 |
| miR167f_1     | 37979.82 | 41420.62 | 52006.86 | 59985.53 | 55937.71 | 50108.20 | 48904.71 | 47032.64 | 46948.36 | 0.55 | 0.29 | 0.11 |
| novel_miR_180 | 10518.38 | 14142.84 | 10360.21 | 7631.80  | 10561.93 | 11820.61 | 12032.74 | 10647.99 | 15144.96 | 0.15 | 0.30 | 0.08 |
| novel_miR_181 | 1011.83  | 1246.95  | 986.69   | 1554.38  | 1496.52  | 1477.18  | 1079.82  | 1207.39  | 1091.34  | 0.66 | 0.57 | 0.06 |
| miR393c_3p    | 484.17   | 730.08   | 323.45   | 573.53   | 626.36   | 884.43   | 718.73   | 766.66   | 947.20   | 0.21 | 0.11 | 0.47 |
| miR5272c      | 455.18   | 516.87   | 457.40   | 462.73   | 731.38   | 504.94   | 508.96   | 525.92   | 442.71   | 0.24 | 0.18 | 0.06 |
| novel_miR_184 | 182.65   | 329.50   | 166.63   | 211.81   | 255.05   | 241.49   | 247.60   | 222.22   | 236.80   | 0.06 | 0.05 | 0.06 |
| novel_miR_185 | 142.06   | 200.29   | 84.95    | 143.38   | 251.30   | 185.04   | 127.24   | 137.04   | 185.32   | 0.25 | 0.19 | 0.05 |
| novel_miR_186 | 434.88   | 458.72   | 444.34   | 677.80   | 502.59   | 567.67   | 670.59   | 588.88   | 555.97   | 0.45 | 0.06 | 0.56 |
| miR390b_3p    | 208.74   | 277.82   | 111.08   | 169.45   | 240.04   | 413.99   | 312.94   | 222.22   | 247.10   | 0.19 | 0.05 | 0.14 |
| miR845a_5p_1  | 942.25   | 1427.85  | 973.62   | 1371.90  | 1432.76  | 2060.53  | 1571.58  | 1137.02  | 926.61   | 0.39 | 0.27 | 0.06 |
| novel_miR_189 | 4108.20  | 2829.86  | 1535.57  | 280.25   | 266.30   | 272.86   | 433.30   | 529.62   | 617.74   | 0.62 | 0.06 | 0.53 |
| miR168a       | 2215.01  | 1854.27  | 3143.02  | 6787.80  | 3566.90  | 3120.59  | 2947.14  | 2885.14  | 2954.86  | 0.44 | 0.27 | 0.07 |
| miR8565g_2    | 594.34   | 697.77   | 568.49   | 765.79   | 885.16   | 1019.29  | 1038.55  | 992.58   | 906.02   | 0.45 | 0.09 | 0.68 |
| novel_miR_191 | 1113.30  | 1369.70  | 901.74   | 811.41   | 1046.44  | 1041.24  | 1017.92  | 1103.69  | 1008.98  | 0.25 | 0.09 | 0.10 |
| novel_miR_192 | 301.52   | 497.49   | 326.72   | 602.85   | 1057.69  | 969.11   | 880.36   | 685.18   | 730.99   | 0.63 | 0.08 | 0.43 |
| miR6445a_2    | 200.05   | 284.28   | 153.56   | 185.74   | 318.81   | 385.76   | 340.45   | 285.18   | 288.28   | 0.27 | 0.05 | 0.31 |
| novel_miR_194 | 1055.32  | 1821.96  | 1231.72  | 1730.35  | 2565.47  | 1448.96  | 1932.67  | 1537.01  | 1564.95  | 0.33 | 0.10 | 0.14 |
| miR812h       | 611.74   | 943.29   | 777.59   | 1026.48  | 960.18   | 1097.69  | 859.73   | 888.88   | 607.45   | 0.43 | 0.41 | 0.05 |
| miR160g_3     | 81.18    | 51.69    | 75.14    | 94.50    | 60.01    | 94.09    | 72.22    | 62.96    | 51.48    | 0.17 | 0.34 | 0.08 |
| miR5998a      | 362.40   | 962.67   | 470.47   | 664.77   | 1046.44  | 1056.92  | 756.56   | 785.17   | 761.88   | 0.38 | 0.12 | 0.14 |
| miR5225a_3    | 327.61   | 542.71   | 329.98   | 664.77   | 873.91   | 599.03   | 563.98   | 522.21   | 442.71   | 0.62 | 0.31 | 0.12 |
| novel_miR_199 | 84.08    | 206.75   | 104.55   | 120.57   | 157.53   | 144.27   | 103.17   | 118.52   | 205.91   | 0.06 | 0.05 | 0.06 |
| novel_miR_2   | 765.39   | 1473.08  | 679.57   | 778.82   | 1308.99  | 1110.24  | 811.58   | 948.13   | 669.22   | 0.07 | 0.19 | 0.11 |
| miR5565g_5p_2 | 345.01   | 323.04   | 225.43   | 436.66   | 348.81   | 376.35   | 347.33   | 448.14   | 380.94   | 0.39 | 0.05 | 0.42 |
| miR166d_5p_2  | 284.12   | 452.26   | 320.18   | 547.46   | 633.87   | 379.49   | 436.74   | 429.62   | 422.12   | 0.49 | 0.18 | 0.14 |
| novel_miR_201 | 243.53   | 510.41   | 192.76   | 267.21   | 375.07   | 504.94   | 371.40   | 370.36   | 298.58   | 0.12 | 0.07 | 0.06 |
| novel_miR_202 | 75.38    | 96.91    | 65.34    | 211.81   | 191.28   | 175.63   | 123.80   | 92.59    | 72.07    | 0.70 | 0.56 | 0.07 |
| novel_miR_203 | 982.84   | 1175.88  | 891.94   | 2026.89  | 2269.16  | 1555.59  | 1660.99  | 1733.31  | 1595.83  | 0.70 | 0.12 | 0.41 |
| novel_miR_204 | 437.78   | 600.86   | 483.54   | 1818.34  | 1601.54  | 947.15   | 839.09   | 907.39   | 689.81   | 0.67 | 0.37 | 0.12 |

|               |         |          |         |          |          |          |          |          |          |      |      |      |
|---------------|---------|----------|---------|----------|----------|----------|----------|----------|----------|------|------|------|
| miR171g_5p    | 388.50  | 730.08   | 258.11  | 309.57   | 510.09   | 708.80   | 608.69   | 433.33   | 277.98   | 0.06 | 0.08 | 0.05 |
| novel_miR_206 | 179.75  | 297.20   | 173.16  | 296.54   | 228.79   | 269.72   | 264.80   | 300.00   | 205.91   | 0.21 | 0.05 | 0.16 |
| novel_miR_207 | 313.12  | 374.73   | 343.05  | 384.52   | 521.35   | 454.76   | 398.91   | 322.22   | 339.76   | 0.51 | 0.44 | 0.05 |
| novel_miR_208 | 371.10  | 885.14   | 490.08  | 443.18   | 618.86   | 495.53   | 639.64   | 774.06   | 751.59   | 0.07 | 0.30 | 0.17 |
| miR3434_5p_2  | 568.25  | 1117.73  | 516.21  | 615.89   | 1020.19  | 1000.47  | 976.65   | 1133.32  | 1008.98  | 0.11 | 0.13 | 0.33 |
| novel_miR_21  | 530.56  | 749.46   | 329.98  | 645.22   | 813.90   | 774.66   | 581.18   | 688.88   | 494.19   | 0.37 | 0.23 | 0.07 |
| miR533b_5p_3  | 365.30  | 497.49   | 271.18  | 589.82   | 558.85   | 511.21   | 422.99   | 629.62   | 401.53   | 0.46 | 0.11 | 0.20 |
| novel_miR_211 | 437.78  | 465.18   | 434.53  | 664.77   | 472.59   | 558.26   | 649.95   | 577.77   | 525.08   | 0.39 | 0.06 | 0.49 |
| miR399e_5p_1  | 150.76  | 187.37   | 160.09  | 140.12   | 247.55   | 147.40   | 171.95   | 159.26   | 144.14   | 0.07 | 0.11 | 0.06 |
| miR5225       | 231.94  | 374.73   | 228.70  | 446.44   | 521.35   | 382.63   | 392.04   | 366.66   | 308.87   | 0.60 | 0.23 | 0.17 |
| novel_miR_214 | 359.50  | 323.04   | 529.28  | 739.72   | 408.82   | 526.89   | 323.26   | 470.36   | 473.60   | 0.30 | 0.25 | 0.05 |
| novel_miR_215 | 405.89  | 562.10   | 375.72  | 338.90   | 480.09   | 316.76   | 326.70   | 381.48   | 391.24   | 0.19 | 0.05 | 0.24 |
| miR2619b_5p   | 211.64  | 342.43   | 153.56  | 195.52   | 311.31   | 263.45   | 220.09   | 274.07   | 226.51   | 0.07 | 0.06 | 0.05 |
| miR474b_3     | 194.25  | 297.20   | 143.76  | 306.31   | 288.80   | 310.49   | 312.94   | 351.85   | 257.39   | 0.39 | 0.05 | 0.43 |
| miR6274a      | 434.88  | 620.24   | 388.79  | 397.56   | 476.34   | 479.85   | 598.37   | 859.25   | 689.81   | 0.06 | 0.55 | 0.45 |
| novel_miR_219 | 185.55  | 342.43   | 294.05  | 449.70   | 363.82   | 329.31   | 422.99   | 337.03   | 308.87   | 0.40 | 0.07 | 0.26 |
| miR5225a_1    | 327.61  | 542.71   | 329.98  | 664.77   | 873.91   | 599.03   | 563.98   | 522.21   | 442.71   | 0.62 | 0.31 | 0.12 |
| novel_miR_220 | 582.74  | 859.30   | 483.54  | 410.59   | 528.85   | 749.57   | 739.37   | 759.25   | 700.11   | 0.10 | 0.28 | 0.12 |
| novel_miR_221 | 765.39  | 1337.40  | 568.49  | 723.42   | 1125.21  | 1176.10  | 1035.11  | 1022.21  | 689.81   | 0.09 | 0.07 | 0.05 |
| novel_miR_222 | 9726.89 | 12372.56 | 8978.19 | 13308.39 | 15764.13 | 14276.31 | 12734.28 | 11788.71 | 10007.41 | 0.61 | 0.36 | 0.10 |
| novel_miR_223 | 86.98   | 193.83   | 65.34   | 149.90   | 232.54   | 332.44   | 233.85   | 185.18   | 257.39   | 0.43 | 0.05 | 0.36 |
| miR6234b_5p   | 400.09  | 626.70   | 490.08  | 540.94   | 798.90   | 514.35   | 536.47   | 514.81   | 483.90   | 0.23 | 0.21 | 0.05 |
| novel_miR_225 | 3502.26 | 5524.04  | 3678.84 | 5692.89  | 6522.44  | 6488.94  | 5385.33  | 5092.52  | 4283.01  | 0.60 | 0.31 | 0.12 |
| miR8565d      | 1426.42 | 2177.31  | 1065.10 | 2127.91  | 2921.78  | 3299.36  | 3222.26  | 2399.96  | 2553.33  | 0.51 | 0.05 | 0.47 |
| miR3434_5p_3  | 298.62  | 374.73   | 212.37  | 283.50   | 300.05   | 404.58   | 299.18   | 274.07   | 257.39   | 0.11 | 0.20 | 0.07 |
| novel_miR_228 | 629.13  | 445.80   | 865.80  | 1309.98  | 716.38   | 1326.64  | 980.09   | 822.21   | 864.84   | 0.51 | 0.16 | 0.18 |
| novel_miR_229 | 318.91  | 245.51   | 192.76  | 283.50   | 251.30   | 272.86   | 220.09   | 337.03   | 236.80   | 0.07 | 0.05 | 0.06 |
| novel_miR_23  | 287.02  | 458.72   | 209.10  | 117.31   | 273.80   | 366.94   | 371.40   | 244.44   | 494.19   | 0.10 | 0.22 | 0.08 |
| miR5208a_1    | 69.58   | 206.75   | 98.02   | 123.83   | 202.54   | 200.72   | 202.90   | 200.00   | 164.73   | 0.22 | 0.06 | 0.32 |
| miR8565g_1    | 756.70  | 904.52   | 715.51  | 1065.58  | 1226.47  | 1226.28  | 1289.59  | 1351.83  | 1142.82  | 0.52 | 0.08 | 0.70 |
| novel_miR_232 | 246.43  | 471.64   | 202.56  | 263.95   | 251.30   | 288.54   | 326.70   | 244.44   | 216.21   | 0.09 | 0.05 | 0.10 |
| novel_miR_233 | 118.87  | 445.80   | 173.16  | 286.76   | 641.37   | 646.07   | 402.35   | 166.66   | 154.44   | 0.38 | 0.39 | 0.05 |

|               |         |          |         |          |          |          |          |          |          |      |      |      |
|---------------|---------|----------|---------|----------|----------|----------|----------|----------|----------|------|------|------|
| novel_miR_234 | 28.99   | 64.61    | 29.40   | 16.29    | 45.01    | 65.86    | 41.27    | 37.04    | 30.89    | 0.05 | 0.07 | 0.06 |
| novel_miR_235 | 1145.19 | 2054.56  | 1182.72 | 1775.97  | 2329.18  | 1900.58  | 1540.63  | 1070.35  | 1369.33  | 0.32 | 0.46 | 0.07 |
| novel_miR_236 | 197.15  | 310.12   | 133.95  | 329.13   | 420.08   | 586.48   | 502.08   | 385.18   | 298.58   | 0.52 | 0.07 | 0.35 |
| novel_miR_237 | 434.88  | 949.75   | 437.80  | 583.30   | 843.90   | 646.07   | 845.97   | 688.88   | 586.85   | 0.09 | 0.05 | 0.10 |
| miR534b       | 110.17  | 155.06   | 29.40   | 55.40    | 90.02    | 232.08   | 82.53    | 70.37    | 61.77    | 0.09 | 0.19 | 0.08 |
| miR8007a_5p_1 | 258.03  | 755.92   | 225.43  | 417.11   | 746.39   | 548.85   | 570.86   | 444.44   | 628.04   | 0.17 | 0.05 | 0.14 |
| novel_miR_240 | 527.66  | 749.46   | 457.40  | 404.07   | 521.35   | 686.84   | 708.42   | 777.77   | 648.63   | 0.07 | 0.35 | 0.23 |
| miR166d_5p_4  | 153.66  | 226.13   | 186.23  | 299.80   | 363.82   | 288.54   | 264.80   | 285.18   | 205.91   | 0.67 | 0.23 | 0.22 |
| novel_miR_242 | 565.35  | 439.34   | 614.23  | 648.47   | 408.82   | 332.44   | 316.38   | 403.70   | 277.98   | 0.11 | 0.22 | 0.47 |
| novel_miR_243 | 156.56  | 187.37   | 111.08  | 218.33   | 232.54   | 210.13   | 199.46   | 177.78   | 164.73   | 0.62 | 0.26 | 0.16 |
| novel_miR_244 | 46.39   | 32.30    | 19.60   | 110.79   | 82.52    | 75.27    | 116.92   | 129.63   | 154.44   | 0.32 | 0.21 | 0.76 |
| miR7717c_3p   | 649.43  | 1111.27  | 699.18  | 1485.95  | 1616.55  | 1031.83  | 1207.06  | 1118.50  | 761.88   | 0.53 | 0.25 | 0.12 |
| novel_miR_246 | 185.55  | 381.19   | 120.89  | 241.14   | 337.56   | 366.94   | 268.23   | 155.55   | 133.84   | 0.18 | 0.35 | 0.08 |
| miR6105b      | 217.44  | 303.66   | 307.11  | 583.30   | 566.35   | 564.53   | 330.14   | 433.33   | 380.94   | 0.77 | 0.41 | 0.16 |
| miR447c_3p_4  | 179.75  | 290.74   | 251.57  | 293.28   | 502.59   | 354.40   | 364.52   | 300.00   | 298.58   | 0.50 | 0.14 | 0.20 |
| miR396b_3     | 2858.63 | 3327.35  | 3518.75 | 8560.52  | 6953.77  | 5341.07  | 5598.54  | 5577.70  | 5981.80  | 0.70 | 0.13 | 0.38 |
| novel_miR_25  | 1122.00 | 2093.32  | 1257.86 | 1658.66  | 2306.67  | 2176.57  | 2114.93  | 1874.05  | 1719.38  | 0.38 | 0.07 | 0.23 |
| miR533b_5p_4  | 72.48   | 122.76   | 127.42  | 133.61   | 168.78   | 163.09   | 99.73    | 103.70   | 144.14   | 0.47 | 0.34 | 0.06 |
| miR9563b_5p_2 | 623.33  | 936.83   | 470.47  | 1059.07  | 1436.51  | 934.61   | 1148.60  | 988.87   | 854.54   | 0.53 | 0.10 | 0.29 |
| novel_miR_252 | 310.22  | 316.58   | 114.35  | 312.83   | 506.34   | 341.85   | 261.36   | 418.51   | 226.51   | 0.34 | 0.15 | 0.09 |
| novel_miR_253 | 9990.72 | 12721.45 | 9229.76 | 14012.27 | 16315.48 | 14709.11 | 13081.61 | 12281.30 | 10326.58 | 0.63 | 0.37 | 0.10 |
| novel_miR_254 | 542.15  | 956.21   | 539.08  | 576.78   | 1053.94  | 862.47   | 852.85   | 703.69   | 700.11   | 0.17 | 0.08 | 0.08 |
| miR2873b      | 229.04  | 445.80   | 231.97  | 355.19   | 427.58   | 439.08   | 615.56   | 511.10   | 298.58   | 0.17 | 0.10 | 0.38 |
| novel_miR_256 | 371.10  | 471.64   | 329.98  | 319.35   | 390.07   | 435.94   | 550.23   | 570.36   | 555.97   | 0.05 | 0.60 | 0.55 |
| miR812o_5p_2  | 130.47  | 258.43   | 166.63  | 211.81   | 311.31   | 228.95   | 154.75   | 85.18    | 61.77    | 0.17 | 0.62 | 0.25 |
| miR9563b_5p_1 | 147.86  | 277.82   | 169.89  | 273.73   | 423.83   | 282.26   | 275.11   | 281.48   | 226.51   | 0.51 | 0.17 | 0.16 |
| miR6297a      | 110.17  | 129.22   | 107.82  | 146.64   | 217.54   | 203.86   | 130.68   | 107.41   | 41.18    | 0.40 | 0.60 | 0.08 |
| miR820c       | 197.15  | 232.59   | 294.05  | 325.87   | 416.33   | 467.30   | 398.91   | 292.59   | 267.69   | 0.60 | 0.21 | 0.19 |
| miR408_5p     | 49.29   | 142.14   | 179.69  | 104.28   | 41.26    | 31.36    | 141.00   | 207.40   | 154.44   | 0.24 | 0.55 | 0.13 |
| miR845a_5p_2  | 942.25  | 1427.85  | 973.62  | 1375.16  | 1432.76  | 2063.67  | 1571.58  | 1137.02  | 926.61   | 0.39 | 0.28 | 0.06 |
| novel_miR_262 | 576.95  | 239.05   | 686.11  | 42.36    | 22.50    | 56.45    | 34.39    | 37.04    | 102.96   | 0.60 | 0.05 | 0.57 |
| miR1520f_5p_7 | 434.88  | 704.23   | 428.00  | 576.78   | 626.36   | 586.48   | 484.89   | 885.17   | 658.92   | 0.10 | 0.10 | 0.26 |

|               |         |         |         |         |         |         |         |         |         |      |      |      |
|---------------|---------|---------|---------|---------|---------|---------|---------|---------|---------|------|------|------|
| novel_miR_264 | 431.98  | 639.63  | 447.60  | 1107.95 | 1391.50 | 1301.55 | 1272.40 | 1244.43 | 1204.60 | 0.68 | 0.05 | 0.65 |
| novel_miR_265 | 487.07  | 1027.28 | 375.72  | 762.53  | 971.43  | 564.53  | 512.40  | 762.95  | 504.49  | 0.11 | 0.15 | 0.05 |
| miR167a_3p    | 2522.32 | 3734.38 | 1921.10 | 2668.85 | 2978.04 | 2860.28 | 2579.18 | 3688.83 | 2769.54 | 0.06 | 0.07 | 0.09 |
| miR166d_5p_1  | 226.14  | 394.11  | 287.51  | 430.14  | 547.60  | 451.62  | 433.30  | 399.99  | 380.94  | 0.63 | 0.16 | 0.27 |
| novel_miR_268 | 750.90  | 1188.80 | 679.57  | 749.49  | 1057.69 | 1125.92 | 1348.05 | 1233.32 | 1338.44 | 0.08 | 0.34 | 0.53 |
| novel_miR_269 | 5.80    | 6.46    | 9.80    | 19.55   | 22.50   | 37.64   | 27.51   | 7.41    | 10.30   | 0.56 | 0.24 | 0.14 |
| miR7484c_4    | 516.06  | 768.84  | 372.46  | 899.39  | 1020.19 | 743.30  | 756.56  | 655.55  | 597.15  | 0.56 | 0.28 | 0.11 |
| novel_miR_270 | 194.25  | 251.97  | 169.89  | 374.75  | 378.82  | 228.95  | 271.67  | 399.99  | 267.69  | 0.43 | 0.06 | 0.35 |
| novel_miR_272 | 1794.62 | 2571.42 | 1770.81 | 2049.70 | 2347.93 | 1627.72 | 1578.46 | 2196.26 | 1739.97 | 0.05 | 0.09 | 0.11 |
| novel_miR_273 | 959.64  | 2073.94 | 1382.01 | 1205.71 | 1987.86 | 1289.01 | 1351.49 | 1255.54 | 1132.53 | 0.05 | 0.13 | 0.11 |
| miR533b_5p_2  | 287.02  | 452.26  | 254.84  | 495.32  | 465.08  | 517.48  | 409.23  | 399.99  | 411.83  | 0.61 | 0.22 | 0.18 |
| novel_miR_275 | 1110.40 | 1027.28 | 1003.02 | 1254.59 | 1391.50 | 1110.24 | 832.22  | 796.28  | 782.47  | 0.23 | 0.75 | 0.30 |
| novel_miR_276 | 968.34  | 2338.83 | 901.74  | 1202.45 | 2392.94 | 4133.61 | 2469.14 | 1351.83 | 1564.95 | 0.29 | 0.15 | 0.08 |
| miR5225b      | 1901.89 | 3127.06 | 1623.79 | 2385.34 | 3210.59 | 2703.47 | 2816.47 | 2996.25 | 2573.92 | 0.24 | 0.05 | 0.26 |
| miR7122a_3p_1 | 805.98  | 1195.26 | 712.24  | 1466.40 | 1616.55 | 1103.97 | 887.24  | 1403.68 | 957.50  | 0.48 | 0.23 | 0.11 |
| miR164e_5p_2  | 43.49   | 45.23   | 49.01   | 101.02  | 93.77   | 65.86   | 92.85   | 100.00  | 113.25  | 0.45 | 0.10 | 0.71 |
| novel_miR_28  | 675.52  | 826.99  | 568.49  | 866.81  | 1072.70 | 1182.37 | 1083.26 | 1055.54 | 1111.93 | 0.52 | 0.06 | 0.61 |
| novel_miR_280 | 1942.48 | 1473.08 | 2646.41 | 1906.32 | 967.68  | 1317.23 | 1217.37 | 1133.32 | 2491.56 | 0.24 | 0.07 | 0.13 |
| miR172d_3     | 139.16  | 122.76  | 179.69  | 687.58  | 270.05  | 191.31  | 251.04  | 303.70  | 257.39  | 0.40 | 0.13 | 0.15 |
| miR1520f_5p_1 | 768.29  | 1040.20 | 548.89  | 720.17  | 1035.19 | 1213.74 | 925.07  | 770.36  | 576.56  | 0.20 | 0.24 | 0.05 |
| novel_miR_283 | 1667.05 | 2500.36 | 1728.33 | 1912.84 | 2149.14 | 1511.68 | 1502.80 | 2107.38 | 1637.02 | 0.07 | 0.07 | 0.12 |
| miR396b_1     | 1991.77 | 2610.19 | 2633.34 | 6429.35 | 6079.86 | 4710.68 | 4879.81 | 4699.93 | 4838.98 | 0.74 | 0.11 | 0.47 |
| bantam_5p     | 5030.15 | 8063.16 | 4423.75 | 3402.05 | 5989.84 | 7818.72 | 7376.46 | 6251.76 | 6208.30 | 0.05 | 0.10 | 0.09 |
| miR5269b      | 371.10  | 846.37  | 300.58  | 329.13  | 630.11  | 815.43  | 732.49  | 622.21  | 463.31  | 0.08 | 0.05 | 0.09 |
| novel_miR_287 | 1110.40 | 1369.70 | 901.74  | 811.41  | 1050.19 | 1056.92 | 1017.92 | 1103.69 | 1008.98 | 0.23 | 0.09 | 0.10 |
| miR6151c      | 37.69   | 122.76  | 68.61   | 169.45  | 138.78  | 147.40  | 127.24  | 74.07   | 41.18   | 0.48 | 0.44 | 0.05 |
| miR164e_5p_1  | 43.49   | 45.23   | 49.01   | 101.02  | 97.52   | 65.86   | 89.41   | 100.00  | 113.25  | 0.47 | 0.09 | 0.69 |
| novel_miR_29  | 556.65  | 710.70  | 571.76  | 586.56  | 701.38  | 599.03  | 536.47  | 596.29  | 483.90  | 0.06 | 0.33 | 0.24 |
| miR399c       | 2365.77 | 2480.97 | 4492.36 | 6738.92 | 5093.43 | 4005.02 | 4618.45 | 4336.97 | 4149.16 | 0.52 | 0.14 | 0.22 |
| novel_miR_291 | 98.57   | 167.98  | 68.61   | 55.40   | 153.78  | 87.82   | 147.87  | 155.55  | 123.55  | 0.07 | 0.25 | 0.15 |
| miR1888b      | 284.12  | 503.95  | 209.10  | 263.95  | 393.82  | 664.89  | 330.14  | 233.33  | 277.98  | 0.15 | 0.26 | 0.07 |
| novel_miR_293 | 852.37  | 1356.78 | 1022.63 | 1570.68 | 2149.14 | 1746.90 | 1657.55 | 1603.68 | 1111.93 | 0.61 | 0.20 | 0.21 |

|               |         |          |         |         |         |          |         |         |         |      |      |      |
|---------------|---------|----------|---------|---------|---------|----------|---------|---------|---------|------|------|------|
| novel_miR_294 | 417.49  | 691.31   | 437.80  | 775.56  | 967.68  | 577.07   | 536.47  | 629.62  | 453.01  | 0.42 | 0.35 | 0.05 |
| novel_miR_295 | 429.09  | 452.26   | 444.34  | 668.03  | 483.84  | 561.39   | 660.27  | 577.77  | 535.38  | 0.42 | 0.06 | 0.53 |
| novel_miR_296 | 449.38  | 374.73   | 349.59  | 606.11  | 420.08  | 633.53   | 467.69  | 466.66  | 277.98  | 0.41 | 0.36 | 0.05 |
| novel_miR_297 | 185.55  | 310.12   | 238.50  | 228.11  | 363.82  | 385.76   | 388.60  | 259.26  | 277.98  | 0.27 | 0.06 | 0.19 |
| miR844_5p_2   | 86.98   | 187.37   | 101.28  | 218.33  | 180.03  | 116.04   | 158.19  | 122.22  | 92.66   | 0.23 | 0.23 | 0.05 |
| miR482d_5p    | 150.76  | 329.50   | 212.37  | 198.78  | 277.55  | 392.03   | 285.43  | 237.03  | 164.73  | 0.15 | 0.16 | 0.05 |
| miR951        | 162.36  | 290.74   | 107.82  | 143.38  | 191.28  | 232.08   | 154.75  | 107.41  | 133.84  | 0.05 | 0.21 | 0.20 |
| novel_miR_300 | 539.26  | 736.54   | 450.87  | 443.18  | 851.41  | 733.89   | 1059.18 | 840.73  | 823.66  | 0.09 | 0.28 | 0.51 |
| novel_miR_301 | 991.53  | 1802.58  | 901.74  | 1091.65 | 1361.50 | 1279.60  | 1619.73 | 1599.98 | 1338.44 | 0.05 | 0.20 | 0.21 |
| novel_miR_302 | 437.78  | 381.19   | 411.66  | 697.35  | 626.36  | 467.30   | 443.62  | 655.55  | 483.90  | 0.50 | 0.11 | 0.24 |
| novel_miR_303 | 307.32  | 251.97   | 316.92  | 413.85  | 502.59  | 335.58   | 333.57  | 351.85  | 308.87  | 0.56 | 0.31 | 0.10 |
| novel_miR_304 | 150.76  | 109.83   | 78.41   | 123.83  | 183.78  | 188.18   | 288.87  | 270.37  | 236.80  | 0.14 | 0.39 | 0.73 |
| miR3434_5p_4  | 304.42  | 323.04   | 163.36  | 241.14  | 240.04  | 304.22   | 226.97  | 229.63  | 205.91  | 0.05 | 0.16 | 0.17 |
| miR5167b_3p   | 101.47  | 193.83   | 140.49  | 143.38  | 210.04  | 232.08   | 165.07  | 162.96  | 92.66   | 0.26 | 0.30 | 0.05 |
| novel_miR_307 | 5.80    | 6.46     | 9.80    | 19.55   | 22.50   | 37.64    | 27.51   | 7.41    | 10.30   | 0.56 | 0.24 | 0.14 |
| novel_miR_308 | 371.10  | 471.64   | 329.98  | 319.35  | 390.07  | 435.94   | 550.23  | 570.36  | 555.97  | 0.05 | 0.60 | 0.55 |
| novel_miR_309 | 202.95  | 277.82   | 254.84  | 221.59  | 435.08  | 435.94   | 526.15  | 270.37  | 370.64  | 0.25 | 0.06 | 0.34 |
| miR8032f_3p   | 89.88   | 142.14   | 91.48   | 149.90  | 123.77  | 131.72   | 68.78   | 88.89   | 72.07   | 0.19 | 0.65 | 0.24 |
| miR533b_5p_5  | 405.89  | 633.16   | 382.26  | 710.39  | 675.12  | 624.12   | 598.37  | 622.21  | 648.63  | 0.55 | 0.08 | 0.35 |
| novel_miR_312 | 1620.67 | 2061.02  | 1558.44 | 1639.11 | 2171.65 | 1972.71  | 2290.31 | 2433.30 | 2172.39 | 0.11 | 0.30 | 0.57 |
| miR8762a      | 60.88   | 174.44   | 120.89  | 234.62  | 225.04  | 213.27   | 220.09  | 111.11  | 92.66   | 0.50 | 0.34 | 0.07 |
| novel_miR_314 | 37.69   | 103.37   | 52.27   | 52.14   | 78.76   | 103.50   | 106.61  | 96.29   | 113.25  | 0.09 | 0.22 | 0.42 |
| miR844_5p_3   | 86.98   | 187.37   | 101.28  | 218.33  | 180.03  | 116.04   | 158.19  | 118.52  | 92.66   | 0.22 | 0.24 | 0.05 |
| novel_miR_316 | 316.02  | 368.27   | 297.31  | 417.11  | 457.58  | 599.03   | 436.74  | 370.36  | 463.31  | 0.60 | 0.15 | 0.25 |
| novel_miR_317 | 556.65  | 710.70   | 575.02  | 586.56  | 697.63  | 599.03   | 536.47  | 581.47  | 483.90  | 0.06 | 0.36 | 0.27 |
| novel_miR_318 | 863.97  | 659.01   | 708.98  | 984.12  | 986.43  | 768.39   | 766.88  | 785.17  | 689.81  | 0.41 | 0.39 | 0.05 |
| miR166d_5p_3  | 255.13  | 432.88   | 251.57  | 426.89  | 633.87  | 388.90   | 392.04  | 318.51  | 308.87  | 0.43 | 0.32 | 0.06 |
| miR2636       | 229.04  | 381.19   | 310.38  | 439.92  | 618.86  | 423.40   | 467.69  | 300.00  | 329.46  | 0.51 | 0.28 | 0.10 |
| novel_miR_320 | 1704.74 | 2545.58  | 1770.81 | 1974.75 | 2205.40 | 1546.18  | 1557.83 | 2166.63 | 1698.79 | 0.06 | 0.07 | 0.11 |
| novel_miR_321 | 8054.04 | 12114.12 | 5622.80 | 5360.51 | 8078.97 | 12046.42 | 8855.19 | 8725.80 | 8926.37 | 0.05 | 0.05 | 0.05 |
| novel_miR_322 | 243.53  | 316.58   | 254.84  | 293.28  | 420.08  | 344.99   | 409.23  | 425.92  | 350.05  | 0.30 | 0.12 | 0.59 |
| novel_miR_323 | 188.45  | 161.52   | 147.02  | 332.38  | 307.56  | 260.31   | 151.31  | 196.29  | 195.62  | 0.67 | 0.57 | 0.06 |

|               |          |          |          |           |          |          |          |          |          |      |      |      |
|---------------|----------|----------|----------|-----------|----------|----------|----------|----------|----------|------|------|------|
| miR395m       | 21373.07 | 12295.03 | 20380.63 | 5533.22   | 5029.67  | 8427.16  | 2696.10  | 2666.63  | 1904.70  | 0.48 | 0.10 | 0.72 |
| novel_miR_325 | 431.98   | 704.23   | 437.80   | 798.37    | 982.68   | 602.16   | 553.66   | 640.73   | 463.31   | 0.44 | 0.37 | 0.05 |
| novel_miR_326 | 3519.66  | 5692.02  | 3711.51  | 5738.51   | 6661.22  | 6586.17  | 5430.04  | 5122.15  | 4293.30  | 0.58 | 0.31 | 0.11 |
| novel_miR_327 | 121.77   | 155.06   | 130.69   | 290.02    | 67.51    | 178.77   | 257.92   | 162.96   | 82.37    | 0.11 | 0.05 | 0.08 |
| novel_miR_328 | 1704.74  | 2545.58  | 1770.81  | 1974.75   | 2205.40  | 1546.18  | 1557.83  | 2166.63  | 1698.79  | 0.06 | 0.07 | 0.11 |
| novel_miR_329 | 542.15   | 956.21   | 529.28   | 563.75    | 1031.44  | 846.79   | 821.90   | 696.29   | 658.92   | 0.15 | 0.09 | 0.06 |
| miR171d       | 3835.67  | 3101.22  | 3424.00  | 3415.08   | 2771.76  | 3584.76  | 3882.53  | 3629.58  | 4118.28  | 0.09 | 0.45 | 0.24 |
| miR5181c_3p   | 1826.51  | 3185.21  | 1911.30  | 2489.62   | 2479.20  | 2361.61  | 2090.86  | 2144.41  | 1770.86  | 0.07 | 0.23 | 0.14 |
| novel_miR_331 | 785.69   | 755.92   | 555.42   | 615.89    | 573.85   | 1100.83  | 952.58   | 1114.80  | 978.09   | 0.06 | 0.29 | 0.42 |
| novel_miR_332 | 208.74   | 264.90   | 202.56   | 306.31    | 341.31   | 338.72   | 306.06   | 344.44   | 267.69   | 0.64 | 0.08 | 0.44 |
| novel_miR_333 | 75.38    | 90.45    | 58.81    | 74.95     | 165.03   | 141.13   | 106.61   | 74.07    | 123.55   | 0.43 | 0.14 | 0.15 |
| novel_miR_334 | 211.64   | 264.90   | 169.89   | 182.49    | 412.58   | 304.22   | 347.33   | 225.92   | 277.98   | 0.26 | 0.06 | 0.18 |
| miR162_1      | 7532.18  | 9510.40  | 10304.66 | 18883.97  | 15857.89 | 12654.85 | 15984.04 | 14396.08 | 13600.61 | 0.63 | 0.07 | 0.47 |
| novel_miR_336 | 182.65   | 251.97   | 173.16   | 110.79    | 303.81   | 376.35   | 299.18   | 240.74   | 144.14   | 0.14 | 0.08 | 0.07 |
| miR396b_3p    | 37284.01 | 36445.75 | 32717.47 | 141517.37 | 68082.43 | 65996.55 | 55902.89 | 55114.00 | 46783.63 | 0.55 | 0.31 | 0.10 |
| novel_miR_338 | 5.80     | 6.46     | 9.80     | 19.55     | 22.50    | 37.64    | 27.51    | 7.41     | 10.30    | 0.56 | 0.24 | 0.14 |
| miR7994a      | 246.43   | 368.27   | 235.24   | 524.65    | 491.34   | 558.26   | 605.25   | 633.32   | 288.28   | 0.47 | 0.05 | 0.42 |
| miR4383_1     | 168.15   | 277.82   | 186.23   | 166.19    | 285.05   | 269.72   | 281.99   | 362.96   | 360.35   | 0.08 | 0.34 | 0.53 |
| miR902j_5p    | 536.36   | 982.05   | 473.74   | 654.99    | 1065.19  | 837.38   | 828.78   | 844.43   | 833.95   | 0.22 | 0.05 | 0.19 |
| miR447c_3p_2  | 431.98   | 697.77   | 506.41   | 674.54    | 941.42   | 821.70   | 663.71   | 574.07   | 607.45   | 0.56 | 0.34 | 0.09 |
| novel_miR_343 | 2281.69  | 3055.99  | 3028.67  | 4493.70   | 5611.02  | 4600.91  | 5134.29  | 4440.67  | 3685.86  | 0.66 | 0.08 | 0.45 |
| novel_miR_344 | 115.97   | 239.05   | 127.42   | 254.18    | 273.80   | 254.04   | 223.53   | 181.48   | 185.32   | 0.57 | 0.28 | 0.12 |
| novel_miR_345 | 89.88    | 155.06   | 81.68    | 84.73     | 153.78   | 128.59   | 110.05   | 148.15   | 123.55   | 0.09 | 0.05 | 0.12 |
| miR7494f      | 2510.73  | 3624.55  | 2417.71  | 4249.30   | 5007.16  | 4616.59  | 5072.39  | 4636.97  | 4077.09  | 0.59 | 0.05 | 0.58 |
| novel_miR_347 | 40.59    | 90.45    | 49.01    | 97.76     | 131.27   | 122.31   | 120.36   | 107.41   | 82.37    | 0.59 | 0.08 | 0.39 |
| miR395d_3p_1  | 1733.74  | 2623.11  | 1444.09  | 1655.40   | 2535.46  | 2593.70  | 2114.93  | 2081.45  | 1688.49  | 0.15 | 0.13 | 0.05 |
| novel_miR_349 | 556.65   | 710.70   | 575.02   | 586.56    | 701.38   | 602.16   | 536.47   | 581.47   | 483.90   | 0.06 | 0.36 | 0.27 |
| miR319b_2     | 2020.76  | 1925.34  | 3564.49  | 2867.63   | 2130.39  | 3434.22  | 2331.58  | 2133.30  | 2872.50  | 0.09 | 0.11 | 0.05 |
| miR164e_5p_3  | 43.49    | 45.23    | 49.01    | 101.02    | 93.77    | 65.86    | 92.85    | 100.00   | 113.25   | 0.45 | 0.10 | 0.71 |
| novel_miR_351 | 3539.95  | 5956.92  | 2871.85  | 3395.53   | 4969.66  | 5250.12  | 4515.29  | 4192.53  | 3932.95  | 0.08 | 0.07 | 0.05 |
| miR7484m_3    | 78.28    | 193.83   | 137.22   | 260.69    | 236.29   | 194.45   | 209.77   | 166.66   | 205.91   | 0.56 | 0.13 | 0.26 |
| novel_miR_353 | 481.27   | 652.55   | 294.05   | 407.33    | 765.14   | 768.39   | 605.25   | 522.21   | 370.64   | 0.23 | 0.19 | 0.05 |

|               |          |          |          |          |          |          |          |          |          |      |      |      |
|---------------|----------|----------|----------|----------|----------|----------|----------|----------|----------|------|------|------|
| miR827_5p     | 153.66   | 206.75   | 163.36   | 202.04   | 255.05   | 313.63   | 326.70   | 248.14   | 216.21   | 0.39 | 0.05 | 0.44 |
| novel_miR_355 | 629.13   | 1078.96  | 454.14   | 524.65   | 877.66   | 743.30   | 639.64   | 777.77   | 710.40   | 0.05 | 0.05 | 0.05 |
| bantam_c      | 211.64   | 264.90   | 287.51   | 306.31   | 495.09   | 417.12   | 281.99   | 214.81   | 205.91   | 0.47 | 0.57 | 0.06 |
| miR9746g      | 626.23   | 891.60   | 392.06   | 472.51   | 656.37   | 708.80   | 674.03   | 662.95   | 535.38   | 0.05 | 0.05 | 0.05 |
| miR319a_3p_2  | 2020.76  | 1925.34  | 3564.49  | 2867.63  | 2130.39  | 3434.22  | 2331.58  | 2133.30  | 2872.50  | 0.09 | 0.11 | 0.05 |
| novel_miR_359 | 269.63   | 335.97   | 94.75    | 241.14   | 435.08   | 614.71   | 354.21   | 262.96   | 144.14   | 0.34 | 0.28 | 0.05 |
| novel_miR_36  | 197.15   | 129.22   | 173.16   | 198.78   | 135.02   | 138.00   | 285.43   | 225.92   | 1153.12  | 0.05 | 0.32 | 0.31 |
| novel_miR_360 | 530.56   | 923.90   | 460.67   | 599.59   | 855.16   | 859.34   | 643.08   | 777.77   | 555.97   | 0.16 | 0.13 | 0.05 |
| miR399t_3p    | 3722.60  | 1376.16  | 1715.27  | 5474.56  | 4474.57  | 4139.88  | 27738.23 | 41099.39 | 37393.95 | 0.05 | 0.63 | 0.70 |
| miR812o_5p_1  | 130.47   | 258.43   | 166.63   | 211.81   | 311.31   | 228.95   | 154.75   | 85.18    | 61.77    | 0.17 | 0.62 | 0.25 |
| miR5770a      | 211.64   | 355.35   | 124.15   | 312.83   | 416.33   | 746.43   | 491.76   | 288.88   | 442.71   | 0.43 | 0.09 | 0.23 |
| miR394a_3p    | 104.37   | 148.60   | 143.76   | 267.21   | 210.04   | 254.04   | 302.62   | 218.52   | 144.14   | 0.53 | 0.07 | 0.37 |
| novel_miR_365 | 150.76   | 206.75   | 212.37   | 290.02   | 255.05   | 272.86   | 199.46   | 185.18   | 185.32   | 0.60 | 0.60 | 0.05 |
| miR7494       | 10779.31 | 15570.69 | 9772.11  | 9492.50  | 14162.58 | 22195.39 | 15578.25 | 14429.42 | 15000.82 | 0.17 | 0.05 | 0.15 |
| miR844_5p_1   | 86.98    | 187.37   | 101.28   | 218.33   | 180.03   | 116.04   | 158.19   | 118.52   | 92.66    | 0.22 | 0.24 | 0.05 |
| novel_miR_368 | 176.85   | 219.67   | 241.77   | 172.71   | 363.82   | 263.45   | 199.46   | 192.59   | 247.10   | 0.20 | 0.20 | 0.05 |
| novel_miR_37  | 446.48   | 484.56   | 375.72   | 475.77   | 588.86   | 508.08   | 464.25   | 699.99   | 494.19   | 0.22 | 0.07 | 0.34 |
| miR6462f      | 727.70   | 1059.58  | 506.41   | 563.75   | 821.40   | 827.98   | 942.26   | 825.91   | 823.66   | 0.05 | 0.15 | 0.11 |
| miR2600c      | 1246.67  | 1731.51  | 1068.37  | 1616.30  | 1721.56  | 1467.77  | 1516.56  | 1825.90  | 1637.02  | 0.24 | 0.06 | 0.34 |
| miR172d_2     | 133.36   | 116.30   | 166.63   | 668.03   | 262.55   | 185.04   | 247.60   | 300.00   | 257.39   | 0.41 | 0.12 | 0.16 |
| miR5638b      | 133.36   | 245.51   | 98.02    | 110.79   | 116.27   | 188.18   | 147.87   | 133.33   | 277.98   | 0.07 | 0.15 | 0.08 |
| novel_miR_374 | 1629.36  | 969.13   | 1976.64  | 3402.05  | 2032.87  | 2857.14  | 2696.10  | 2303.67  | 2368.01  | 0.57 | 0.08 | 0.36 |
| novel_miR_375 | 101.47   | 361.81   | 147.02   | 276.99   | 401.32   | 410.85   | 281.99   | 155.55   | 175.03   | 0.39 | 0.38 | 0.05 |
| miR5084_5p    | 533.46   | 775.30   | 411.66   | 583.30   | 727.63   | 1041.24  | 1152.03  | 1118.50  | 710.40   | 0.16 | 0.16 | 0.49 |
| novel_miR_377 | 139.16   | 155.06   | 163.36   | 306.31   | 243.79   | 206.99   | 206.33   | 118.52   | 123.55   | 0.50 | 0.53 | 0.05 |
| novel_miR_378 | 785.69   | 2351.76  | 764.52   | 850.51   | 1350.25  | 1056.92  | 1227.69  | 996.28   | 1256.07  | 0.08 | 0.05 | 0.06 |
| novel_miR_379 | 316.02   | 652.55   | 509.68   | 772.30   | 918.92   | 658.62   | 515.84   | 429.62   | 401.53   | 0.46 | 0.57 | 0.06 |
| miR393b_3p    | 2272.99  | 3837.75  | 2192.27  | 5754.80  | 6548.70  | 5557.47  | 5928.68  | 5503.62  | 4519.81  | 0.69 | 0.08 | 0.50 |
| novel_miR_381 | 144.96   | 277.82   | 98.02    | 123.83   | 228.79   | 232.08   | 206.33   | 222.22   | 205.91   | 0.07 | 0.06 | 0.12 |
| miR5163a_3p   | 1954.08  | 3747.30  | 2035.45  | 2665.59  | 3983.23  | 5839.74  | 4838.54  | 3866.61  | 4221.23  | 0.33 | 0.05 | 0.38 |
| miR159k_3p_2  | 16183.46 | 12857.12 | 17397.70 | 11695.35 | 11998.44 | 15819.35 | 17308.02 | 16514.57 | 19572.11 | 0.18 | 0.55 | 0.18 |
| novel_miR_384 | 318.91   | 594.40   | 290.78   | 449.70   | 903.91   | 812.29   | 890.68   | 803.69   | 720.70   | 0.37 | 0.07 | 0.54 |

|               |          |          |          |          |          |          |          |          |          |      |      |      |
|---------------|----------|----------|----------|----------|----------|----------|----------|----------|----------|------|------|------|
| miR1509a_3p   | 426.19   | 768.84   | 457.40   | 742.98   | 1128.96  | 947.15   | 928.51   | 840.73   | 710.40   | 0.56 | 0.09 | 0.32 |
| miR159k_3p_1  | 16183.46 | 12857.12 | 17397.70 | 11695.35 | 11998.44 | 15819.35 | 17308.02 | 16514.57 | 19572.11 | 0.18 | 0.55 | 0.18 |
| miR1520f_5p_3 | 347.91   | 452.26   | 264.64   | 498.58   | 423.83   | 363.81   | 326.70   | 485.18   | 319.17   | 0.20 | 0.12 | 0.06 |
| miR1520f_5p_1 | 342.11   | 335.97   | 303.85   | 325.87   | 562.60   | 555.12   | 402.35   | 411.11   | 247.10   | 0.41 | 0.30 | 0.06 |
| miR474b_1     | 150.76   | 213.21   | 101.28   | 224.85   | 210.04   | 254.04   | 240.72   | 244.44   | 205.91   | 0.46 | 0.05 | 0.46 |
| miR5302b_3p   | 220.34   | 335.97   | 271.18   | 364.97   | 626.36   | 407.72   | 285.43   | 296.29   | 185.32   | 0.44 | 0.51 | 0.05 |
| novel_miR_390 | 576.95   | 239.05   | 686.11   | 42.36    | 22.50    | 56.45    | 34.39    | 37.04    | 102.96   | 0.60 | 0.05 | 0.57 |
| miR1520f_5p_2 | 974.14   | 1330.94  | 927.88   | 1316.50  | 1912.85  | 1621.45  | 1430.59  | 1337.02  | 1235.48  | 0.59 | 0.21 | 0.18 |
| novel_miR_392 | 1333.64  | 1789.66  | 937.68   | 1117.72  | 1616.55  | 1859.81  | 1719.45  | 1540.72  | 1492.88  | 0.11 | 0.06 | 0.15 |
| novel_miR_393 | 605.94   | 891.60   | 395.33   | 580.04   | 877.66   | 947.15   | 684.34   | 751.84   | 566.26   | 0.21 | 0.15 | 0.06 |
| novel_miR_394 | 487.07   | 898.06   | 581.56   | 423.63   | 607.61   | 768.39   | 443.62   | 581.47   | 525.08   | 0.07 | 0.10 | 0.20 |
| novel_miR_395 | 10990.95 | 16190.93 | 9703.50  | 17639.16 | 20302.46 | 16010.66 | 15234.36 | 18751.57 | 15515.61 | 0.53 | 0.08 | 0.33 |
| novel_miR_396 | 60.88    | 142.14   | 55.54    | 45.62    | 123.77   | 232.08   | 168.51   | 100.00   | 82.37    | 0.16 | 0.06 | 0.09 |
| novel_miR_397 | 1214.77  | 1557.07  | 1150.04  | 1541.35  | 1642.80  | 1671.63  | 1502.80  | 1759.23  | 1431.10  | 0.47 | 0.06 | 0.34 |
| miR2600b      | 1310.45  | 1854.27  | 1123.91  | 1785.75  | 1871.59  | 1555.59  | 1605.97  | 1844.42  | 1698.79  | 0.30 | 0.05 | 0.27 |
| novel_miR_399 | 243.53   | 510.41   | 192.76   | 267.21   | 375.07   | 504.94   | 371.40   | 370.36   | 298.58   | 0.12 | 0.07 | 0.06 |
| miR5038b      | 1203.18  | 1977.03  | 1176.18  | 1997.56  | 2471.70  | 1935.08  | 1980.81  | 2174.04  | 1606.13  | 0.49 | 0.09 | 0.27 |
| miR6137a      | 556.65   | 1040.20  | 568.49   | 723.42   | 832.65   | 987.93   | 918.19   | 781.47   | 638.33   | 0.14 | 0.08 | 0.07 |
| miR533b_5p_6  | 1165.49  | 1925.34  | 1261.13  | 1710.80  | 2779.26  | 2336.52  | 1791.67  | 1414.79  | 1111.93  | 0.44 | 0.44 | 0.05 |
| miR827        | 805.98   | 581.48   | 1228.46  | 1766.20  | 1447.76  | 1160.42  | 4704.43  | 4922.15  | 5827.36  | 0.06 | 0.60 | 0.73 |
| miR447c_3p_1  | 629.13   | 1001.43  | 774.32   | 1039.51  | 1369.00  | 1260.78  | 1100.45  | 966.65   | 833.95   | 0.60 | 0.27 | 0.14 |
| miR167d       | 37025.98 | 40399.80 | 50938.50 | 58251.92 | 54092.37 | 49070.10 | 47821.45 | 45895.62 | 45743.76 | 0.55 | 0.28 | 0.11 |
| novel_miR_404 | 936.45   | 1066.04  | 882.14   | 1450.11  | 1308.99  | 1351.73  | 997.28   | 970.36   | 885.43   | 0.63 | 0.66 | 0.05 |
| novel_miR_405 | 516.06   | 575.02   | 699.18   | 892.87   | 577.61   | 555.12   | 732.49   | 618.51   | 926.61   | 0.10 | 0.11 | 0.27 |
| miR1862c      | 350.81   | 652.55   | 287.51   | 332.38   | 457.58   | 558.26   | 636.20   | 607.40   | 514.78   | 0.05 | 0.23 | 0.28 |
| novel_miR_407 | 316.02   | 568.56   | 382.26   | 700.61   | 765.14   | 975.38   | 835.65   | 755.54   | 803.06   | 0.60 | 0.05 | 0.57 |
| novel_miR_408 | 40.59    | 51.69    | 58.81    | 81.47    | 67.51    | 90.95    | 51.58    | 85.18    | 41.18    | 0.48 | 0.27 | 0.09 |
| novel_miR_409 | 626.23   | 1085.43  | 382.26   | 472.51   | 862.66   | 900.11   | 594.93   | 611.10   | 432.42   | 0.06 | 0.18 | 0.12 |
| miR164e_5p_4  | 43.49    | 45.23    | 49.01    | 101.02   | 97.52    | 65.86    | 89.41    | 100.00   | 113.25   | 0.47 | 0.09 | 0.69 |
| novel_miR_410 | 423.29   | 542.71   | 267.91   | 208.55   | 390.07   | 454.76   | 395.47   | 333.33   | 339.76   | 0.11 | 0.05 | 0.10 |
| miR5565g_5p_1 | 188.45   | 219.67   | 147.02   | 215.07   | 165.03   | 178.77   | 171.95   | 222.22   | 236.80   | 0.05 | 0.16 | 0.17 |
| miR8762d      | 1406.12  | 2435.75  | 1016.09  | 1368.64  | 1995.36  | 2239.30  | 2751.13  | 2040.71  | 2192.98  | 0.08 | 0.17 | 0.34 |

|               |          |          |          |          |          |         |         |         |         |      |      |      |
|---------------|----------|----------|----------|----------|----------|---------|---------|---------|---------|------|------|------|
| novel_miR_413 | 5.80     | 6.46     | 9.80     | 19.55    | 22.50    | 37.64   | 27.51   | 7.41    | 10.30   | 0.56 | 0.24 | 0.14 |
| novel_miR_414 | 2502.03  | 3521.17  | 2287.02  | 3597.57  | 3428.13  | 3089.23 | 3119.09 | 3299.95 | 2707.77 | 0.35 | 0.14 | 0.11 |
| miR4383_2     | 121.77   | 316.58   | 111.08   | 172.71   | 161.28   | 238.36  | 202.90  | 174.07  | 113.25  | 0.05 | 0.08 | 0.07 |
| miR2087_5p    | 287.02   | 348.89   | 228.70   | 501.83   | 712.63   | 504.94  | 381.72  | 296.29  | 411.83  | 0.66 | 0.41 | 0.10 |
| novel_miR_417 | 411.69   | 516.87   | 463.94   | 1635.85  | 1425.26  | 859.34  | 804.70  | 829.62  | 638.33  | 0.68 | 0.35 | 0.13 |
| novel_miR_418 | 1704.74  | 2545.58  | 1770.81  | 1974.75  | 2205.40  | 1546.18 | 1557.83 | 2166.63 | 1698.79 | 0.06 | 0.07 | 0.11 |
| novel_miR_419 | 171.05   | 135.68   | 212.37   | 195.52   | 101.27   | 166.22  | 244.16  | 196.29  | 216.21  | 0.08 | 0.44 | 0.25 |
| miR1520f_5p_8 | 1919.29  | 2881.55  | 1558.44  | 2150.72  | 2918.03  | 2966.91 | 2345.34 | 2570.33 | 2295.94 | 0.29 | 0.11 | 0.11 |
| novel_miR_420 | 408.79   | 510.41   | 454.14   | 1622.82  | 1406.51  | 856.20  | 787.51  | 837.02  | 638.33  | 0.68 | 0.35 | 0.14 |
| miR171        | 156.56   | 167.98   | 205.83   | 175.97   | 150.03   | 203.86  | 409.23  | 255.55  | 247.10  | 0.05 | 0.49 | 0.49 |
| novel_miR_422 | 171.05   | 206.75   | 133.95   | 280.25   | 333.81   | 210.13  | 147.87  | 181.48  | 247.10  | 0.50 | 0.35 | 0.07 |
| novel_miR_423 | 60.88    | 277.82   | 68.61    | 166.19   | 180.03   | 272.86  | 202.90  | 148.15  | 144.14  | 0.20 | 0.10 | 0.08 |
| miR5079a      | 379.80   | 555.63   | 300.58   | 345.42   | 600.11   | 495.53  | 416.11  | 488.88  | 401.53  | 0.13 | 0.09 | 0.06 |
| novel_miR_425 | 287.02   | 368.27   | 186.23   | 492.06   | 705.13   | 539.44  | 464.25  | 496.29  | 267.69  | 0.62 | 0.25 | 0.17 |
| miR1024a      | 382.70   | 652.55   | 512.95   | 821.18   | 948.92   | 642.94  | 577.74  | 651.84  | 648.63  | 0.58 | 0.27 | 0.13 |
| novel_miR_427 | 208.74   | 297.20   | 173.16   | 293.28   | 360.07   | 360.67  | 447.06  | 392.59  | 319.17  | 0.35 | 0.11 | 0.62 |
| miR396b_2     | 2841.24  | 3346.73  | 3505.68  | 8518.15  | 6946.27  | 5278.34 | 5591.66 | 5562.88 | 5971.50 | 0.69 | 0.13 | 0.38 |
| miR845a_5p_3  | 933.55   | 1382.63  | 944.21   | 1323.02  | 1421.51  | 2029.17 | 1533.75 | 1077.76 | 895.73  | 0.39 | 0.29 | 0.06 |
| novel_miR_43  | 629.13   | 445.80   | 862.53   | 1296.95  | 712.63   | 1314.10 | 969.77  | 811.10  | 864.84  | 0.51 | 0.16 | 0.17 |
| novel_miR_430 | 643.63   | 1040.20  | 669.77   | 625.66   | 1312.74  | 1304.69 | 1072.94 | 1088.87 | 823.66  | 0.27 | 0.07 | 0.16 |
| novel_miR_431 | 173.95   | 277.82   | 81.68    | 270.47   | 337.56   | 301.08  | 299.18  | 388.88  | 308.87  | 0.39 | 0.07 | 0.54 |
| novel_miR_432 | 159.46   | 226.13   | 114.35   | 205.30   | 311.31   | 319.90  | 196.02  | 188.89  | 164.73  | 0.52 | 0.41 | 0.06 |
| novel_miR_433 | 1295.95  | 1279.25  | 1368.95  | 1199.19  | 1297.74  | 2007.21 | 2335.02 | 1796.27 | 2388.60 | 0.08 | 0.41 | 0.59 |
| novel_miR_434 | 913.26   | 1285.71  | 767.79   | 1130.76  | 1481.52  | 1273.33 | 904.43  | 792.58  | 700.11  | 0.28 | 0.60 | 0.14 |
| novel_miR_435 | 591.44   | 956.21   | 450.87   | 459.47   | 656.37   | 1034.97 | 856.29  | 796.28  | 823.66  | 0.06 | 0.10 | 0.15 |
| miR7484m_1    | 1727.94  | 2493.89  | 1290.53  | 2593.90  | 2794.26  | 2176.57 | 1777.92 | 2522.18 | 1966.48 | 0.40 | 0.19 | 0.10 |
| novel_miR_437 | 63.78    | 200.29   | 137.22   | 185.74   | 191.28   | 197.59  | 92.85   | 100.00  | 82.37   | 0.25 | 0.60 | 0.15 |
| novel_miR_438 | 1968.57  | 1873.65  | 2630.07  | 3030.56  | 2269.16  | 2816.37 | 3043.43 | 2770.33 | 2501.85 | 0.35 | 0.05 | 0.42 |
| novel_miR_439 | 478.37   | 568.56   | 414.93   | 622.41   | 1053.94  | 780.93  | 639.64  | 907.39  | 803.06  | 0.50 | 0.06 | 0.42 |
| novel_miR_44  | 40.59    | 90.45    | 49.01    | 104.28   | 131.27   | 122.31  | 120.36  | 118.52  | 82.37   | 0.60 | 0.07 | 0.42 |
| miR395b       | 78299.32 | 38952.56 | 61203.95 | 13966.64 | 17721.98 | 8721.97 | 7544.96 | 6633.24 | 3366.69 | 0.55 | 0.06 | 0.68 |
| miR1520f_5p_1 | 1510.50  | 2442.21  | 1022.63  | 2039.93  | 2404.19  | 1859.81 | 1764.16 | 2788.85 | 1822.34 | 0.17 | 0.05 | 0.19 |

|               |         |         |          |          |          |          |          |          |          |      |      |      |
|---------------|---------|---------|----------|----------|----------|----------|----------|----------|----------|------|------|------|
| novel_miR_442 | 1272.76 | 1272.79 | 1391.82  | 2026.89  | 1489.02  | 1326.64  | 1657.55  | 1848.12  | 1976.77  | 0.23 | 0.14 | 0.55 |
| miR857        | 318.91  | 445.80  | 542.35   | 423.63   | 412.58   | 241.49   | 478.01   | 329.62   | 453.01   | 0.17 | 0.13 | 0.05 |
| miR1919b      | 574.05  | 1066.04 | 627.30   | 857.03   | 847.65   | 1107.10  | 1114.21  | 1040.73  | 906.02   | 0.20 | 0.08 | 0.37 |
| novel_miR_445 | 1110.40 | 1369.70 | 901.74   | 811.41   | 1046.44  | 1041.24  | 1017.92  | 1099.98  | 1008.98  | 0.25 | 0.09 | 0.10 |
| miR845a_5p_4  | 321.81  | 568.56  | 222.17   | 133.61   | 341.31   | 508.08   | 422.99   | 388.88   | 370.64   | 0.07 | 0.09 | 0.06 |
| miR7532a      | 516.06  | 962.67  | 467.21   | 1551.13  | 2047.87  | 2095.03  | 1124.52  | 911.10   | 823.66   | 0.72 | 0.48 | 0.09 |
| novel_miR_448 | 142.06  | 187.37  | 107.82   | 215.07   | 240.04   | 225.81   | 199.46   | 200.00   | 164.73   | 0.66 | 0.20 | 0.23 |
| miR1222c      | 127.57  | 193.83  | 156.82   | 175.97   | 251.30   | 163.09   | 168.51   | 200.00   | 113.25   | 0.20 | 0.19 | 0.05 |
| novel_miR_45  | 81.18   | 122.76  | 49.01    | 162.93   | 195.04   | 250.90   | 361.09   | 292.59   | 123.55   | 0.29 | 0.10 | 0.55 |
| novel_miR_450 | 142.06  | 232.59  | 163.36   | 312.83   | 363.82   | 191.31   | 244.16   | 366.66   | 226.51   | 0.37 | 0.05 | 0.32 |
| novel_miR_451 | 1725.04 | 1977.03 | 1502.90  | 1000.41  | 1369.00  | 1555.59  | 1815.74  | 1855.53  | 1523.76  | 0.42 | 0.42 | 0.05 |
| miR7726a_5p   | 150.76  | 335.97  | 189.50   | 237.88   | 431.33   | 344.99   | 254.48   | 237.03   | 164.73   | 0.32 | 0.35 | 0.05 |
| novel_miR_453 | 1203.18 | 1318.02 | 931.14   | 1815.08  | 2389.19  | 2430.61  | 2386.60  | 2448.11  | 2234.17  | 0.57 | 0.06 | 0.68 |
| novel_miR_454 | 57.98   | 116.30  | 58.81    | 156.42   | 157.53   | 128.59   | 106.61   | 129.63   | 144.14   | 0.63 | 0.10 | 0.36 |
| novel_miR_455 | 5.80    | 6.46    | 9.80     | 19.55    | 22.50    | 37.64    | 27.51    | 7.41     | 10.30    | 0.56 | 0.24 | 0.14 |
| miR4360       | 130.47  | 122.76  | 101.28   | 143.38   | 202.54   | 297.95   | 123.80   | 137.04   | 195.62   | 0.49 | 0.24 | 0.10 |
| novel_miR_458 | 3255.83 | 4839.19 | 2688.88  | 5301.85  | 5325.97  | 4459.78  | 4081.98  | 5022.15  | 4087.39  | 0.49 | 0.14 | 0.19 |
| miR1520f_5p_6 | 600.14  | 691.31  | 483.54   | 703.87   | 967.68   | 862.47   | 835.65   | 840.73   | 689.81   | 0.55 | 0.07 | 0.37 |
| novel_miR_46  | 118.87  | 193.83  | 160.09   | 319.35   | 255.05   | 200.72   | 275.11   | 170.37   | 144.14   | 0.46 | 0.21 | 0.11 |
| miR1520f_5p_5 | 553.75  | 969.13  | 356.12   | 759.27   | 903.91   | 871.88   | 711.85   | 1233.32  | 751.59   | 0.19 | 0.06 | 0.27 |
| miR6019a      | 292.82  | 445.80  | 209.10   | 469.25   | 667.62   | 865.61   | 591.49   | 511.10   | 442.71   | 0.60 | 0.16 | 0.24 |
| miR4401a      | 516.06  | 768.84  | 450.87   | 798.37   | 825.15   | 846.79   | 735.93   | 688.88   | 597.15   | 0.57 | 0.25 | 0.13 |
| miR166l_5p    | 104.37  | 277.82  | 199.30   | 97.76    | 161.28   | 232.08   | 206.33   | 166.66   | 205.91   | 0.10 | 0.09 | 0.05 |
| miR528_5p     | 1139.39 | 3773.15 | 5126.19  | 1036.26  | 423.83   | 627.25   | 1478.73  | 2374.04  | 2090.03  | 0.55 | 0.17 | 0.19 |
| miR166_1      | 7546.68 | 7656.13 | 10928.69 | 16247.71 | 13262.42 | 14326.49 | 17321.78 | 12081.30 | 12498.97 | 0.57 | 0.06 | 0.48 |
| novel_miR_466 | 168.15  | 271.36  | 140.49   | 149.90   | 285.05   | 291.67   | 178.82   | 229.63   | 216.21   | 0.18 | 0.11 | 0.06 |
| miR160g_1     | 63.78   | 38.77   | 65.34    | 65.17    | 45.01    | 59.59    | 58.46    | 62.96    | 41.18    | 0.05 | 0.06 | 0.05 |
| miR4378a      | 1426.42 | 2390.52 | 1215.39  | 1049.29  | 1642.80  | 3227.22  | 2104.61  | 1940.71  | 1873.82  | 0.08 | 0.05 | 0.08 |
| novel_miR_469 | 371.10  | 471.64  | 329.98   | 319.35   | 390.07   | 435.94   | 550.23   | 570.36   | 555.97   | 0.05 | 0.60 | 0.55 |
| miR7122a_3p_2 | 805.98  | 1195.26 | 712.24   | 1466.40  | 1616.55  | 1103.97  | 887.24   | 1403.68  | 957.50   | 0.48 | 0.23 | 0.11 |
| miR157d_3p    | 66.68   | 64.61   | 94.75    | 221.59   | 63.76    | 169.36   | 27.51    | 44.44    | 61.77    | 0.31 | 0.54 | 0.09 |
| novel_miR_471 | 513.16  | 1053.12 | 532.55   | 589.82   | 993.93   | 984.79   | 725.61   | 503.70   | 453.01   | 0.12 | 0.32 | 0.11 |

|               |         |          |         |          |          |          |          |          |          |      |      |      |
|---------------|---------|----------|---------|----------|----------|----------|----------|----------|----------|------|------|------|
| novel_miR_472 | 913.26  | 1285.71  | 767.79  | 1130.76  | 1481.52  | 1273.33  | 904.43   | 792.58   | 700.11   | 0.28 | 0.60 | 0.14 |
| novel_miR_473 | 1823.61 | 2610.19  | 1819.82 | 2108.36  | 2396.69  | 1634.00  | 1633.48  | 2240.71  | 1760.56  | 0.05 | 0.09 | 0.11 |
| novel_miR_474 | 2481.73 | 3689.15  | 1927.63 | 3564.98  | 4568.33  | 3512.62  | 3304.79  | 3444.39  | 2748.95  | 0.47 | 0.21 | 0.12 |
| novel_miR_475 | 234.84  | 271.36   | 235.24  | 400.82   | 491.34   | 316.76   | 361.09   | 488.88   | 370.64   | 0.50 | 0.05 | 0.52 |
| novel_miR_476 | 5.80    | 6.46     | 9.80    | 19.55    | 22.50    | 37.64    | 27.51    | 7.41     | 10.30    | 0.56 | 0.24 | 0.14 |
| miR1520f_5p_1 | 1023.43 | 1440.77  | 999.75  | 1456.62  | 2002.87  | 1731.22  | 1530.31  | 1481.46  | 1235.48  | 0.60 | 0.23 | 0.17 |
| novel_miR_478 | 8054.04 | 12114.12 | 5622.80 | 5360.51  | 8078.97  | 12046.42 | 8855.19  | 8725.80  | 8926.37  | 0.05 | 0.05 | 0.05 |
| novel_miR_479 | 246.43  | 503.95   | 225.43  | 459.47   | 510.09   | 504.94   | 371.40   | 329.62   | 236.80   | 0.39 | 0.44 | 0.05 |
| novel_miR_48  | 307.32  | 529.79   | 323.45  | 439.92   | 435.08   | 470.44   | 481.45   | 555.55   | 339.76   | 0.13 | 0.05 | 0.17 |
| miR8007b_5p_2 | 791.49  | 1537.69  | 610.96  | 977.60   | 1459.02  | 1643.41  | 1348.05  | 1377.76  | 1328.14  | 0.26 | 0.05 | 0.25 |
| miR5225a_4    | 327.61  | 542.71   | 329.98  | 664.77   | 873.91   | 599.03   | 563.98   | 522.21   | 442.71   | 0.62 | 0.31 | 0.12 |
| novel_miR_482 | 28.99   | 64.61    | 29.40   | 16.29    | 45.01    | 65.86    | 41.27    | 37.04    | 30.89    | 0.05 | 0.07 | 0.06 |
| novel_miR_483 | 1116.20 | 814.07   | 604.43  | 1081.88  | 1106.45  | 1332.92  | 2114.93  | 2996.25  | 2913.68  | 0.07 | 0.54 | 0.71 |
| novel_miR_484 | #####   | 83881.43 | #####   | 11551.97 | 10651.94 | 13947.00 | 12957.80 | 14840.52 | 58294.21 | 0.64 | 0.06 | 0.54 |
| novel_miR_485 | 2139.63 | 3760.22  | 1620.52 | 1922.61  | 2659.24  | 2653.29  | 3332.30  | 3359.21  | 3232.85  | 0.05 | 0.32 | 0.27 |
| novel_miR_486 | 197.15  | 310.12   | 163.36  | 312.83   | 296.30   | 363.81   | 237.28   | 237.03   | 226.51   | 0.49 | 0.41 | 0.05 |
| miR399b_2     | 3951.64 | 2784.63  | 3469.74 | 5422.42  | 4264.53  | 3224.09  | 15760.51 | 21907.08 | 16370.15 | 0.05 | 0.63 | 0.69 |
| novel_miR_488 | 263.83  | 497.49   | 303.85  | 420.37   | 498.84   | 420.26   | 350.77   | 377.77   | 308.87   | 0.27 | 0.31 | 0.05 |
| novel_miR_489 | 252.23  | 374.73   | 231.97  | 172.71   | 345.06   | 348.13   | 367.96   | 255.55   | 339.76   | 0.05 | 0.09 | 0.09 |
| miR6445a_1    | 263.83  | 413.50   | 192.76  | 267.21   | 427.58   | 413.99   | 419.55   | 340.74   | 319.17   | 0.21 | 0.05 | 0.17 |
| novel_miR_490 | 687.12  | 1066.04  | 405.13  | 622.41   | 1091.45  | 840.52   | 804.70   | 1125.91  | 895.73   | 0.10 | 0.07 | 0.21 |
| novel_miR_491 | 591.44  | 904.52   | 395.33  | 1072.10  | 1005.18  | 1085.15  | 942.26   | 762.95   | 638.33   | 0.58 | 0.29 | 0.12 |
| novel_miR_492 | 629.13  | 445.80   | 865.80  | 1309.98  | 716.38   | 1326.64  | 980.09   | 822.21   | 864.84   | 0.51 | 0.16 | 0.18 |
| miR399e_5p_2  | 420.39  | 639.63   | 346.32  | 935.24   | 1654.05  | 1878.63  | 1413.39  | 929.62   | 761.88   | 0.64 | 0.18 | 0.25 |
| miR8007b_5p_1 | 791.49  | 1537.69  | 610.96  | 977.60   | 1459.02  | 1643.41  | 1348.05  | 1377.76  | 1328.14  | 0.26 | 0.05 | 0.25 |
| miR167f_2     | 147.86  | 142.14   | 202.56  | 329.13   | 356.32   | 169.36   | 268.23   | 151.85   | 175.03   | 0.44 | 0.25 | 0.08 |
| novel_miR_496 | 63.78   | 174.44   | 71.88   | 205.30   | 288.80   | 188.18   | 123.80   | 151.85   | 102.96   | 0.57 | 0.41 | 0.07 |
| miR7729a_3p   | 339.21  | 387.65   | 336.52  | 413.85   | 382.57   | 388.90   | 770.32   | 607.40   | 483.90   | 0.06 | 0.48 | 0.62 |
| miR4401b      | 318.91  | 400.57   | 454.14  | 609.37   | 472.59   | 708.80   | 766.88   | 599.99   | 648.63   | 0.39 | 0.09 | 0.63 |
| novel_miR_499 | 829.18  | 1544.15  | 722.05  | 1046.03  | 1391.50  | 1119.65  | 1234.57  | 1599.98  | 1389.92  | 0.09 | 0.14 | 0.33 |
| miR160g_5     | 81.18   | 51.69    | 75.14   | 94.50    | 60.01    | 94.09    | 72.22    | 62.96    | 51.48    | 0.17 | 0.34 | 0.08 |
| miR7484m_2    | 81.18   | 200.29   | 150.29  | 263.95   | 236.29   | 203.86   | 220.09   | 166.66   | 205.91   | 0.55 | 0.14 | 0.23 |

|                |          |          |          |          |          |          |          |          |          |      |      |      |
|----------------|----------|----------|----------|----------|----------|----------|----------|----------|----------|------|------|------|
| miR2907a       | 292.82   | 491.03   | 173.16   | 296.54   | 461.33   | 680.57   | 398.91   | 433.33   | 432.42   | 0.28 | 0.08 | 0.14 |
| novel_miR_501  | 231.94   | 303.66   | 267.91   | 658.25   | 547.60   | 498.67   | 481.45   | 362.96   | 216.21   | 0.65 | 0.39 | 0.10 |
| novel_miR_502  | 165.26   | 264.90   | 153.56   | 250.92   | 307.56   | 225.81   | 240.72   | 266.66   | 205.91   | 0.38 | 0.09 | 0.19 |
| novel_miR_503  | 800.19   | 1395.55  | 620.76   | 1186.15  | 1552.78  | 928.34   | 766.88   | 1114.80  | 1029.57  | 0.21 | 0.17 | 0.05 |
| miR1520f_5p_4  | 463.88   | 620.24   | 362.66   | 635.44   | 630.11   | 558.26   | 505.52   | 874.06   | 607.45   | 0.19 | 0.08 | 0.34 |
| novel_miR_505  | 147.86   | 271.36   | 156.82   | 166.19   | 438.83   | 404.58   | 319.82   | 218.52   | 133.84   | 0.34 | 0.22 | 0.06 |
| novel_miR_506  | 1942.48  | 1473.08  | 2646.41  | 1906.32  | 967.68   | 1317.23  | 1217.37  | 1133.32  | 2491.56  | 0.24 | 0.07 | 0.13 |
| miR2084        | 1481.50  | 2364.68  | 1558.44  | 2662.33  | 3405.62  | 2828.92  | 3005.61  | 2936.99  | 2913.68  | 0.58 | 0.05 | 0.57 |
| miR1919_5p     | 1272.76  | 1692.75  | 1218.66  | 3265.18  | 2925.53  | 1521.09  | 2077.10  | 2581.44  | 2172.39  | 0.51 | 0.08 | 0.32 |
| novel_miR_51   | 1548.19  | 2112.70  | 1215.39  | 2417.93  | 2674.24  | 2571.74  | 2228.41  | 1962.93  | 1842.93  | 0.66 | 0.29 | 0.17 |
| novel_miR_52   | 866.87   | 1027.28  | 937.68   | 1280.66  | 1357.75  | 1191.78  | 1076.38  | 1370.35  | 875.13   | 0.54 | 0.18 | 0.17 |
| novel_miR_53   | 50530.56 | 28130.61 | 43002.53 | 6670.49  | 5044.67  | 7276.15  | 6086.87  | 4459.19  | 27561.57 | 0.65 | 0.07 | 0.48 |
| miR773b_3p     | 374.00   | 523.33   | 274.44   | 342.16   | 540.10   | 715.07   | 529.59   | 570.36   | 483.90   | 0.25 | 0.05 | 0.24 |
| miR5208a_2     | 69.58    | 206.75   | 98.02    | 123.83   | 202.54   | 200.72   | 202.90   | 200.00   | 164.73   | 0.22 | 0.06 | 0.32 |
| novel_miR_56   | 8619.39  | 12262.72 | 7837.95  | 8570.29  | 11878.42 | 16192.57 | 15031.47 | 15318.29 | 12478.38 | 0.18 | 0.13 | 0.45 |
| miR4381        | 289.92   | 562.10   | 261.37   | 544.20   | 540.10   | 379.49   | 412.67   | 614.81   | 257.39   | 0.17 | 0.08 | 0.08 |
| miR1520f_5p_9  | 1490.20  | 2455.13  | 1130.44  | 1606.52  | 2325.42  | 2380.43  | 1619.73  | 1911.08  | 1472.28  | 0.19 | 0.21 | 0.05 |
| miR166k        | 7975.76  | 8114.85  | 11637.67 | 17150.36 | 14155.08 | 15279.91 | 18432.55 | 12673.89 | 13209.37 | 0.57 | 0.06 | 0.47 |
| miR533b_5p_1   | 481.27   | 678.39   | 362.66   | 857.03   | 750.14   | 708.80   | 560.54   | 799.99   | 525.08   | 0.51 | 0.19 | 0.15 |
| novel_miR_60   | 690.02   | 575.02   | 673.04   | 681.06   | 697.63   | 699.39   | 715.29   | 666.66   | 442.71   | 0.10 | 0.22 | 0.08 |
| miR1887        | 817.58   | 1240.49  | 565.22   | 586.56   | 1001.43  | 1282.73  | 1141.72  | 881.47   | 803.06   | 0.07 | 0.05 | 0.06 |
| miR399c_5p     | 185.55   | 71.07    | 147.02   | 547.46   | 131.27   | 72.13    | 440.18   | 966.65   | 669.22   | 0.07 | 0.40 | 0.58 |
| novel_miR_64   | 52.19    | 51.69    | 62.08    | 101.02   | 71.26    | 97.22    | 55.02    | 96.29    | 41.18    | 0.46 | 0.28 | 0.08 |
| miR160g_2      | 63.78    | 38.77    | 65.34    | 65.17    | 45.01    | 59.59    | 58.46    | 62.96    | 41.18    | 0.05 | 0.06 | 0.05 |
| novel_miR_66   | 788.59   | 1343.86  | 767.79   | 749.49   | 1005.18  | 1267.05  | 1031.67  | 985.17   | 1050.16  | 0.06 | 0.05 | 0.06 |
| miR1520f_5p_10 | 1090.11  | 1544.15  | 797.19   | 1137.27  | 1601.54  | 1762.58  | 1447.78  | 1618.49  | 1431.10  | 0.29 | 0.05 | 0.29 |
| miR162_3       | 7532.18  | 9510.40  | 10304.66 | 18883.97 | 15857.89 | 12654.85 | 15984.04 | 14396.08 | 13600.61 | 0.63 | 0.07 | 0.47 |
| novel_miR_7    | 753.80   | 1053.12  | 748.18   | 896.13   | 1226.47  | 1129.06  | 1375.56  | 1388.87  | 1111.93  | 0.22 | 0.19 | 0.62 |
| novel_miR_70   | 663.92   | 1020.82  | 646.90   | 870.06   | 1282.73  | 1038.11  | 1038.55  | 888.88   | 730.99   | 0.39 | 0.18 | 0.10 |
| novel_miR_71   | 46.39    | 32.30    | 19.60    | 110.79   | 82.52    | 75.27    | 116.92   | 129.63   | 154.44   | 0.32 | 0.21 | 0.76 |
| miR394d        | 301.52   | 193.83   | 411.66   | 540.94   | 225.04   | 338.72   | 1251.76  | 396.29   | 535.38   | 0.06 | 0.28 | 0.37 |
| novel_miR_73   | 118.87   | 142.14   | 39.21    | 78.21    | 105.02   | 128.59   | 185.70   | 155.55   | 113.25   | 0.05 | 0.27 | 0.31 |

|               |         |          |         |         |         |         |         |         |         |      |      |      |
|---------------|---------|----------|---------|---------|---------|---------|---------|---------|---------|------|------|------|
| miR5595a_2    | 7984.46 | 9251.96  | 7994.77 | 6634.64 | 7490.12 | 9603.26 | 7610.30 | 7910.99 | 7793.84 | 0.10 | 0.05 | 0.14 |
| novel_miR_76  | 556.65  | 710.70   | 575.02  | 586.56  | 701.38  | 602.16  | 536.47  | 581.47  | 483.90  | 0.06 | 0.36 | 0.27 |
| novel_miR_77  | 1716.34 | 2655.42  | 1610.72 | 1837.89 | 2685.49 | 2110.71 | 2331.58 | 2766.63 | 2388.60 | 0.09 | 0.13 | 0.29 |
| miR319        | 646.53  | 407.03   | 1016.09 | 759.27  | 442.58  | 733.89  | 550.23  | 688.88  | 730.99  | 0.06 | 0.05 | 0.06 |
| miR1516a_5p   | 159.46  | 465.18   | 130.69  | 394.30  | 551.35  | 780.93  | 632.76  | 344.44  | 380.94  | 0.47 | 0.11 | 0.22 |
| miR3434_5p_1  | 295.72  | 374.73   | 212.37  | 283.50  | 296.30  | 395.17  | 292.31  | 274.07  | 257.39  | 0.10 | 0.20 | 0.07 |
| miR8007a_5p_2 | 6401.48 | 10931.79 | 4871.36 | 4910.81 | 9102.91 | 9891.80 | 9756.18 | 8292.47 | 8895.48 | 0.06 | 0.09 | 0.14 |
| miR172d_1     | 133.36  | 116.30   | 166.63  | 668.03  | 262.55  | 185.04  | 247.60  | 300.00  | 257.39  | 0.41 | 0.12 | 0.16 |
| novel_miR_82  | 568.25  | 710.70   | 575.02  | 586.56  | 697.63  | 599.03  | 539.91  | 581.47  | 483.90  | 0.05 | 0.36 | 0.30 |
| novel_miR_83  | 817.58  | 788.23   | 754.72  | 1160.09 | 757.64  | 1050.65 | 1396.20 | 1674.05 | 1389.92 | 0.11 | 0.44 | 0.72 |
| novel_miR_84  | 1707.64 | 2061.02  | 1372.21 | 1397.97 | 2122.89 | 2392.97 | 1918.91 | 1896.27 | 1606.13 | 0.15 | 0.09 | 0.06 |
| novel_miR_85  | 37.69   | 103.37   | 52.27   | 52.14   | 78.76   | 103.50  | 106.61  | 96.29   | 113.25  | 0.09 | 0.22 | 0.42 |
| novel_miR_86  | 57.98   | 116.30   | 58.81   | 156.42  | 157.53  | 128.59  | 106.61  | 129.63  | 144.14  | 0.63 | 0.10 | 0.36 |
| novel_miR_87  | 1113.30 | 1382.63  | 905.01  | 821.18  | 1042.69 | 1047.51 | 1017.92 | 1111.09 | 1008.98 | 0.25 | 0.09 | 0.11 |
| miR4383_3     | 1756.93 | 2513.28  | 1061.83 | 1674.95 | 2351.68 | 2392.97 | 2561.99 | 2540.70 | 2316.53 | 0.14 | 0.12 | 0.38 |
| novel_miR_89  | 139.16  | 155.06   | 163.36  | 306.31  | 243.79  | 206.99  | 206.33  | 118.52  | 123.55  | 0.50 | 0.53 | 0.05 |
| miR319a_3p_1  | 2009.16 | 1918.88  | 3551.42 | 2861.11 | 2115.39 | 3434.22 | 2331.58 | 2133.30 | 2872.50 | 0.09 | 0.11 | 0.05 |
| miR6459a_3p   | 371.10  | 743.00   | 388.79  | 514.87  | 671.37  | 464.17  | 584.61  | 640.73  | 545.67  | 0.08 | 0.07 | 0.14 |
| novel_miR_91  | 318.91  | 226.13   | 196.03  | 267.21  | 251.30  | 269.72  | 206.33  | 325.92  | 236.80  | 0.07 | 0.05 | 0.06 |
| miR5285a      | 156.56  | 245.51   | 104.55  | 254.18  | 247.55  | 144.27  | 168.51  | 237.03  | 195.62  | 0.18 | 0.06 | 0.11 |
| novel_miR_93  | 287.02  | 471.64   | 274.44  | 364.97  | 510.09  | 379.49  | 450.50  | 340.74  | 339.76  | 0.20 | 0.09 | 0.08 |
| novel_miR_94  | 2502.03 | 3521.17  | 2287.02 | 3597.57 | 3428.13 | 3089.23 | 3119.09 | 3299.95 | 2707.77 | 0.35 | 0.14 | 0.11 |
| miR169c_3p    | 307.32  | 471.64   | 156.82  | 312.83  | 506.34  | 467.30  | 392.04  | 274.07  | 247.10  | 0.23 | 0.25 | 0.05 |
| novel_miR_96  | 443.58  | 775.30   | 346.32  | 446.44  | 772.64  | 693.12  | 433.30  | 544.44  | 514.78  | 0.15 | 0.19 | 0.05 |
| novel_miR_97  | 1962.77 | 2345.29  | 1672.79 | 1306.73 | 1920.35 | 1819.04 | 2101.17 | 2262.93 | 1832.63 | 0.23 | 0.32 | 0.06 |
| novel_miR_98  | 260.93  | 342.43   | 271.18  | 514.87  | 581.36  | 489.26  | 440.18  | 451.85  | 329.46  | 0.73 | 0.26 | 0.24 |
| novel miR_99  | 313.12  | 555.63   | 336.52  | 599.59  | 1267.73 | 655.48  | 677.46  | 737.03  | 576.56  | 0.49 | 0.12 | 0.21 |

Note: CK1-FR8-3 indicated TPM value of miRNA expression in different samples. CK1\_CK2\_CK3\_vs\_FR2-1\_FR2-2\_FR2-3, FR2-1\_FR2-2\_FR2-3\_vs\_FR8-1\_FR8-2\_FR8-3, CK1\_CK2\_CK3\_vs\_FR8-1\_FR8-2\_FR8-3 indicated The power value of miRNA expression between different treatments was compared, respectively.
