# Supplementary material for: RNA sequencing-based exploration of the effects of far-red light on microRNAs involved in the shade-avoidance response of D. officinale
Source: PeerJ journal article supplement (doi:10.7717/peerj.15001), 2023-03-20
Supplement: Table_S3.pdf [file Table_S3.pdf]

Table S3 miRNAs up- or downregulated in FR2-CK

| #ID            | CK1 TPM    | CK2 TPM    | CK3 TPM    | FR2-1 TPM  | FR2-2 TPM  | FR2-3 TPM  | Pvalue     | FDR        | log2FC      | regulated |
|----------------|------------|------------|------------|------------|------------|------------|------------|------------|-------------|-----------|
| novel_miR_189  | 4108.199   | 2829.85954 | 1535.57135 | 280.245312 | 266.2986   | 272.855575 | 1.32E-22   | 6.60E-20   | -3.82493503 | down      |
| novel_miR_484  | 191966.253 | 83881.4302 | 180681.206 | 11551.9725 | 10651.944  | 13946.997  | 1.52E-20   | 3.80E-18   | -4.20486469 | down      |
| novel_miR_53   | 50530.5578 | 28130.6129 | 43002.5321 | 6670.49017 | 5044.67065 | 7276.14866 | 9.96E-16   | 1.66E-13   | -3.19123694 | down      |
| novel_miR_262  | 576.945379 | 239.052062 | 686.106347 | 42.3626635 | 22.504107  | 56.4528775 | 4.71E-15   | 5.41E-13   | -4.15939936 | down      |
| novel_miR_390  | 576.945379 | 239.052062 | 686.106347 | 42.3626635 | 22.504107  | 56.4528775 | 5.42E-15   | 5.41E-13   | -4.15939723 | down      |
| miR399b_1      | 26794.619  | 28815.4647 | 37833.8643 | 9235.06064 | 9673.01533 | 11550.886  | 1.03E-10   | 8.54E-09   | -2.10309458 | down      |
| miR395b        | 78299.3158 | 38952.5643 | 61203.9533 | 13966.6443 | 17721.9843 | 8721.96958 | 1.42E-10   | 1.01E-08   | -2.67436258 | down      |
| miR395m        | 21373.072  | 12295.029  | 20380.6257 | 5533.21559 | 5029.66791 | 8427.16011 | 1.56E-07   | 8.72E-06   | -2.03510748 | down      |
| miR528_5p      | 1139.39464 | 3773.14605 | 5126.19456 | 1036.25592 | 423.827349 | 627.254195 | 1.57E-07   | 8.72E-06   | -2.67460242 | down      |
| miR399e_5p_2   | 420.387336 | 639.625787 | 346.320346 | 935.237264 | 1654.05186 | 1878.62631 | 1.89E-06   | 9.42E-05   | 1.249181458 | up        |
| miR7532a       | 516.061696 | 962.669113 | 467.20575  | 1551.12522 | 2047.87374 | 2095.02901 | 4.62E-06   | 0.00020938 | 1.168860011 | up        |
| novel_miR_264  | 431.984228 | 639.625787 | 447.602712 | 1107.94658 | 1391.50395 | 1301.55245 | 4.43E-05   | 0.0018408  | 0.897247319 | up        |
| novel_miR_204  | 437.782674 | 600.860587 | 483.541616 | 1818.33586 | 1601.54228 | 947.153834 | 0.00016149 | 0.00619887 | 1.10059286  | up        |
| novel_miR_420  | 408.790444 | 510.408456 | 454.137058 | 1622.81588 | 1406.50669 | 856.201976 | 0.00021664 | 0.00772178 | 1.066066015 | up        |
| novel_miR_417  | 411.689667 | 516.869323 | 463.938577 | 1635.85055 | 1425.26011 | 859.338247 | 0.00024511 | 0.00815392 | 1.058538515 | up        |
| novel_miR_192  | 301.519193 | 497.486723 | 326.717308 | 602.853288 | 1057.69303 | 969.107731 | 0.00073819 | 0.02302224 | 0.798895311 | up        |
| novel_miR_451  | 1725.03769 | 1977.02516 | 1502.89962 | 1000.41059 | 1368.99984 | 1555.5904  | 0.0010395  | 0.03051251 | -0.86075914 | down      |
| novel_miR_1    | 1113.30164 | 1369.70371 | 901.73977  | 811.407939 | 1046.44098 | 1041.24196 | 0.0046899  | 0.12057268 | -0.65888591 | down      |
| novel_miR_445  | 1110.40241 | 1369.70371 | 901.73977  | 811.407939 | 1046.44098 | 1041.24196 | 0.00476336 | 0.12057268 | -0.65744678 | down      |
| miR530a        | 95.6743593 | 122.756464 | 104.549539 | 286.762645 | 228.791755 | 297.945743 | 0.00492977 | 0.12057268 | 0.89183093  | up        |
| novel_miR_191  | 1113.30164 | 1369.70371 | 901.73977  | 811.407939 | 1046.44098 | 1041.24196 | 0.00528307 | 0.12057268 | -0.6588524  | down      |
| novel_miR_215  | 405.891221 | 562.095388 | 375.724904 | 338.901308 | 480.087616 | 316.763368 | 0.00531583 | 0.12057268 | -0.67421221 | down      |
| miR396b_1      | 1991.76621 | 2610.19008 | 2633.3415  | 6429.34885 | 6079.85957 | 4710.679   | 0.00603334 | 0.12399955 | 0.805439951 | up        |
| novel_miR_87   | 1113.30164 | 1382.62544 | 905.006943 | 821.183939 | 1042.69029 | 1047.51451 | 0.00625145 | 0.12399955 | -0.65781755 | down      |
| miR393b_3p     | 2272.99084 | 3837.75472 | 2192.27314 | 5754.8049  | 6548.69514 | 5557.47217 | 0.00644209 | 0.12399955 | 0.711314138 | up        |
| novel_miR_97   | 1962.77398 | 2345.29455 | 1672.79262 | 1306.72524 | 1920.35046 | 1819.03717 | 0.0064609  | 0.12399955 | -0.69321229 | down      |
| miR1520f_5p_11 | 1342.34025 | 2209.61635 | 1006.28931 | 1081.87725 | 1297.73684 | 1292.14364 | 0.00696369 | 0.12647831 | -0.6941246  | down      |

|               |            |            |            |            |            |            |            |            |             |      |
|---------------|------------|------------|------------|------------|------------|------------|------------|------------|-------------|------|
| novel_miR_280 | 1942.47942 | 1473.07757 | 2646.41019 | 1906.31986 | 967.676601 | 1317.23381 | 0.0075567  | 0.12647831 | -1.02076278 | down |
| novel_miR_287 | 1110.40241 | 1369.70371 | 901.73977  | 811.407939 | 1050.19166 | 1056.92332 | 0.00757106 | 0.12647831 | -0.64794768 | down |
| novel_miR_506 | 1942.47942 | 1473.07757 | 2646.41019 | 1906.31986 | 967.676601 | 1317.23381 | 0.00760391 | 0.12647831 | -1.02076046 | down |
| miR1516a_5p   | 159.457266 | 465.18239  | 130.686923 | 394.298637 | 551.350622 | 780.931473 | 0.00941992 | 0.14977144 | 0.896053117 | up   |
| miR408_5p     | 49.2867911 | 142.139064 | 179.694519 | 104.277326 | 41.2575295 | 31.3627097 | 0.00981683 | 0.14977144 | -1.45887466 | down |
| novel_miR_202 | 75.3797982 | 96.912998  | 65.3434616 | 211.813318 | 191.28491  | 175.631175 | 0.0100251  | 0.14977144 | 0.855751983 | up   |
| novel_miR_45  | 81.1782442 | 122.756464 | 49.0075962 | 162.933321 | 195.035594 | 250.901678 | 0.01029385 | 0.14977144 | 0.886643802 | up   |
| miR6019a      | 292.821524 | 445.799791 | 209.099077 | 469.247965 | 667.621841 | 865.610789 | 0.01050501 | 0.14977144 | 0.680547195 | up   |
| miR396b_3p    | 37284.0079 | 36445.7481 | 32717.4712 | 141517.365 | 68082.425  | 65996.5501 | 0.01113538 | 0.1543487  | 0.953858207 | up   |
| miR4387e      | 78.2790212 | 96.912998  | 120.885404 | 202.037318 | 168.780803 | 517.484711 | 0.01283683 | 0.17312378 | 1.098733759 | up   |
| novel_miR_220 | 582.743825 | 859.295249 | 483.541616 | 410.591969 | 528.846515 | 749.568763 | 0.01358069 | 0.17833591 | -0.59936991 | down |
| novel_miR_501 | 231.937841 | 303.660727 | 267.908192 | 658.250618 | 547.599937 | 498.667085 | 0.01582455 | 0.1947051  | 0.648918365 | up   |
| novel_miR_180 | 10518.3811 | 14142.8368 | 10360.2058 | 7631.79676 | 10561.9276 | 11820.6053 | 0.01605214 | 0.1947051  | -0.66310859 | down |
| novel_miR_115 | 495.767134 | 704.234452 | 450.869885 | 355.19464  | 476.336932 | 639.799279 | 0.01619067 | 0.1947051  | -0.590319   | down |
| novel_miR_425 | 287.023078 | 368.269392 | 186.228866 | 492.05863  | 705.128686 | 539.438608 | 0.01666733 | 0.1947051  | 0.62445181  | up   |
| novel_miR_99  | 313.116085 | 555.634522 | 336.518827 | 599.594622 | 1267.73136 | 655.480634 | 0.0167782  | 0.1947051  | 0.645554446 | up   |
| novel_miR_496 | 63.7829062 | 174.443396 | 71.8778077 | 205.295985 | 288.802707 | 188.176258 | 0.01955219 | 0.21681201 | 0.817053762 | up   |
| miR6105b      | 217.441726 | 303.660727 | 307.114269 | 583.30129  | 566.35336  | 564.528775 | 0.02050811 | 0.21941069 | 0.597730206 | up   |
| miR857        | 318.914531 | 445.799791 | 542.350731 | 423.626635 | 412.575295 | 241.492865 | 0.02121393 | 0.21941069 | -0.73941256 | down |
| novel_miR_159 | 649.425954 | 678.390986 | 676.304827 | 651.733285 | 483.838301 | 661.753176 | 0.02311816 | 0.2261905  | -0.61264256 | down |
| miR159k_3p_1  | 16183.4628 | 12857.1244 | 17397.6966 | 11695.3538 | 11998.4397 | 15819.3508 | 0.02357095 | 0.2261905  | -0.73495503 | down |
| miR159k_3p_2  | 16183.4628 | 12857.1244 | 17397.6966 | 11695.3538 | 11998.4397 | 15819.3508 | 0.02465879 | 0.22739438 | -0.7349526  | down |
| novel_miR_71  | 46.3875681 | 32.3043327 | 19.6030385 | 110.794658 | 82.515059  | 75.2705034 | 0.02795339 | 0.24321271 | 0.946415698 | up   |
| novel_miR_236 | 197.147165 | 310.121594 | 133.954096 | 329.125309 | 420.076664 | 586.482672 | 0.02810736 | 0.24321271 | 0.673287052 | up   |
| novel_miR_244 | 46.3875681 | 32.3043327 | 19.6030385 | 110.794658 | 82.515059  | 75.2705034 | 0.02826921 | 0.24321271 | 0.946575693 | up   |
| novel_miR_410 | 423.286559 | 542.712789 | 267.908192 | 208.554651 | 390.071188 | 454.759291 | 0.03001584 | 0.25386281 | -0.65444099 | down |
| novel_miR_176 | 110.170474 | 161.521663 | 120.885404 | 172.70932  | 300.05476  | 439.077936 | 0.03158816 | 0.26270823 | 0.769252124 | up   |
| novel_miR_23  | 287.023078 | 458.721524 | 209.099077 | 117.311991 | 273.799969 | 366.943704 | 0.03396834 | 0.27376884 | -0.73778696 | down |
| novel_miR_233 | 118.868143 | 445.799791 | 173.160173 | 286.762645 | 641.36705  | 646.071821 | 0.03421041 | 0.27376884 | 0.771104321 | up   |
| osa-miR5523   | 0          | 6.46086653 | 0          | 3.25866642 | 30.005476  | 12.5450839 | 0.034564   | 0.27376884 | 2.720618247 | up   |

|               |            |            |            |            |            |            |            |            |             |      |
|---------------|------------|------------|------------|------------|------------|------------|------------|------------|-------------|------|
| miR396b_3     | 2858.63389 | 3327.34626 | 3518.74541 | 8560.51669 | 6953.76906 | 5341.06947 | 0.0352718  | 0.27500981 | 0.656895787 | up   |
| miR396b_2     | 2841.23855 | 3346.72886 | 3505.67671 | 8518.15403 | 6946.26769 | 5278.34405 | 0.03597913 | 0.27620904 | 0.652023813 | up   |
| miR5770a      | 211.64328  | 355.347659 | 124.152577 | 312.831977 | 416.32598  | 746.432492 | 0.03770717 | 0.28508908 | 0.725492852 | up   |
| novel_miR_242 | 565.348487 | 439.338924 | 614.228539 | 648.474618 | 408.824611 | 332.444723 | 0.04156139 | 0.30498724 | -0.69923177 | down |
| miR172d_1     | 133.364258 | 116.295598 | 166.625827 | 668.026617 | 262.547915 | 185.039988 | 0.04391459 | 0.31441142 | 0.969357365 | up   |
| miR172d_2     | 133.364258 | 116.295598 | 166.625827 | 668.026617 | 262.547915 | 185.039988 | 0.04410581 | 0.31441142 | 0.969375799 | up   |
| miR172k       | 429.085005 | 348.886793 | 787.388712 | 3180.45843 | 1582.78886 | 310.490826 | 0.04673754 | 0.31600602 | 1.219742133 | up   |

---
