# Supplementary material for: RNA sequencing-based exploration of the effects of far-red light on microRNAs involved in the shade-avoidance response of D. officinale
Source: PeerJ journal article supplement (doi:10.7717/peerj.15001), 2023-03-20
Supplement: Table_S4.pdf [file Table_S4.pdf]

Table S4 miRNAs up- or downregulated in FR8-CK

| #ID           | CK1 TPM    | CK2 TPM    | CK3 TPM    | FR8-1 TPM  | FR8-2 TPM  | FR8-3 TPM  | Pvalue     | FDR        | log2FC      | regulated |
|---------------|------------|------------|------------|------------|------------|------------|------------|------------|-------------|-----------|
| miR395m       | 21373.072  | 12295.029  | 20380.6257 | 2696.10372 | 2666.62716 | 1904.70307 | 7.61E-18   | 2.10E-15   | -3.25772511 | down      |
| miR395b       | 78299.3158 | 38952.5643 | 61203.9533 | 7544.96372 | 6633.23506 | 3366.69138 | 8.41E-18   | 2.10E-15   | -3.72604981 | down      |
| miR399t_3p    | 3722.60234 | 1376.16457 | 1715.26587 | 27738.2303 | 41099.3911 | 37393.9544 | 3.59E-15   | 5.97E-13   | 3.606930859 | up        |
| novel_miR_189 | 4108.199   | 2829.85954 | 1535.57135 | 433.302383 | 529.621783 | 617.741537 | 5.23E-15   | 6.53E-13   | -2.71785953 | down      |
| novel_miR_390 | 576.945379 | 239.052062 | 686.106347 | 34.389078  | 37.0364884 | 102.956923 | 2.93E-11   | 2.53E-09   | -3.66901295 | down      |
| novel_miR_262 | 576.945379 | 239.052062 | 686.106347 | 34.389078  | 37.0364884 | 102.956923 | 3.05E-11   | 2.53E-09   | -3.66877199 | down      |
| miR399b_2     | 3951.64096 | 2784.63348 | 3469.73781 | 15760.5145 | 21907.0829 | 16370.1507 | 2.36E-10   | 1.69E-08   | 2.072480945 | up        |
| novel_miR_264 | 431.984228 | 639.625787 | 447.602712 | 1272.39589 | 1244.42601 | 1204.596   | 1.31E-09   | 8.20E-08   | 1.037907144 | up        |
| miR827        | 805.983996 | 581.477988 | 1228.45708 | 4704.42587 | 4922.1493  | 5827.36183 | 2.15E-09   | 1.19E-07   | 2.205017066 | up        |
| miR399c_5p    | 185.550273 | 71.0695319 | 147.022789 | 440.180199 | 966.652346 | 669.219998 | 5.40E-07   | 2.70E-05   | 1.954215127 | up        |
| novel_miR_483 | 1116.20086 | 814.069183 | 604.42702  | 2114.9283  | 2996.25191 | 2913.68092 | 9.88E-07   | 4.48E-05   | 1.363671654 | up        |
| novel_miR_484 | 191966.253 | 83881.4302 | 180681.206 | 12957.8046 | 14840.5209 | 58294.2097 | 5.85E-06   | 0.00024335 | -2.72166856 | down      |
| novel_miR_244 | 46.3875681 | 32.3043327 | 19.6030385 | 116.922865 | 129.627709 | 154.435384 | 1.29E-05   | 0.00049533 | 1.601838276 | up        |
| novel_miR_71  | 46.3875681 | 32.3043327 | 19.6030385 | 116.922865 | 129.627709 | 154.435384 | 1.41E-05   | 0.00050395 | 1.602882269 | up        |
| miR399e_5p_2  | 420.387336 | 639.625787 | 346.320346 | 1413.39111 | 929.615858 | 761.881229 | 2.65E-05   | 0.00088144 | 0.923894241 | up        |
| novel_miR_45  | 81.1782442 | 122.756464 | 49.0075962 | 361.085319 | 292.588258 | 123.548307 | 3.12E-05   | 0.0009735  | 1.461548561 | up        |
| novel_miR_384 | 318.914531 | 594.399721 | 290.778404 | 890.677121 | 803.691797 | 720.69846  | 4.60E-05   | 0.00134988 | 0.809933153 | up        |
| novel_miR_192 | 301.519193 | 497.486723 | 326.717308 | 880.360398 | 685.175034 | 730.994152 | 0.00015875 | 0.00440101 | 0.790235609 | up        |
| novel_miR_453 | 1203.17755 | 1318.01677 | 931.144327 | 2386.60202 | 2448.11188 | 2234.16523 | 0.00018804 | 0.00493861 | 0.761802771 | up        |
| novel_miR_159 | 649.425954 | 678.390986 | 676.304827 | 433.302383 | 555.547325 | 391.236307 | 0.00021725 | 0.00542048 | -0.83192569 | down      |
| miR530a       | 95.6743593 | 122.756464 | 104.549539 | 230.406823 | 303.699205 | 216.209538 | 0.00029505 | 0.00701105 | 0.940135919 | up        |
| novel_miR_242 | 565.348487 | 439.338924 | 614.228539 | 316.379518 | 403.697723 | 277.983692 | 0.00031837 | 0.00722124 | -1.03059885 | down      |
| novel_miR_407 | 316.015308 | 568.556255 | 382.25925  | 835.654596 | 755.544362 | 803.063998 | 0.0004921  | 0.01067646 | 0.679898141 | up        |
| miR812o_5p_2  | 130.465035 | 258.434661 | 166.625827 | 154.750851 | 85.1839232 | 61.7741537 | 0.00069089 | 0.01379054 | -1.01136364 | down      |
| miR812o_5p_1  | 130.465035 | 258.434661 | 166.625827 | 154.750851 | 85.1839232 | 61.7741537 | 0.00069091 | 0.01379054 | -1.0113639  | down      |
| novel_miR_53  | 50530.5578 | 28130.6129 | 43002.5321 | 6086.86681 | 4459.1932  | 27561.5682 | 0.00123217 | 0.02364822 | -1.95637273 | down      |
| novel_miR_304 | 150.759596 | 109.834731 | 78.4121539 | 288.868255 | 270.366365 | 236.800923 | 0.00162133 | 0.02996458 | 0.901669585 | up        |

|               |            |            |            |            |            |            |            |            |             |      |
|---------------|------------|------------|------------|------------|------------|------------|------------|------------|-------------|------|
| novel_miR_275 | 1110.40241 | 1027.27778 | 1003.02214 | 832.215688 | 796.2845   | 782.472614 | 0.00178505 | 0.0318122  | -0.69121516 | down |
| miR393b_3p    | 2272.99084 | 3837.75472 | 2192.27314 | 5928.67705 | 5503.62217 | 4519.80891 | 0.00372965 | 0.06003527 | 0.715544357 | up   |
| novel_miR_83  | 817.580888 | 788.225717 | 754.716981 | 1396.19657 | 1674.04927 | 1389.91846 | 0.00641173 | 0.09410155 | 0.614603692 | up   |
| novel_miR_141 | 1954.07631 | 2952.61601 | 1300.33489 | 4253.92895 | 3870.31303 | 3572.60522 | 0.00663337 | 0.09457284 | 0.701457284 | up   |
| miR396b_1     | 1991.76621 | 2610.19008 | 2633.3415  | 4879.81017 | 4699.93037 | 4838.97537 | 0.00687841 | 0.09534238 | 0.71194909  | up   |
| novel_miR_36  | 197.147165 | 129.217331 | 173.160173 | 285.429348 | 225.922579 | 1153.11754 | 0.00759419 | 0.10241896 | 1.415174644 | up   |
| novel_miR_223 | 86.9766903 | 193.825996 | 65.3434616 | 233.845731 | 185.182442 | 257.392307 | 0.00891167 | 0.11402373 | 0.785835068 | up   |
| novel_miR_236 | 197.147165 | 310.121594 | 133.954096 | 502.080539 | 385.179479 | 298.575076 | 0.00937661 | 0.11697317 | 0.700468644 | up   |
| miR157d_3p    | 66.6821292 | 64.6086653 | 94.7480193 | 27.5112624 | 44.443786  | 61.7741537 | 0.00962609 | 0.11715653 | -1.25610897 | down |
| miR528_5p     | 1139.39464 | 3773.14605 | 5126.19456 | 1478.73036 | 2374.0389  | 2090.02553 | 0.01628801 | 0.15630227 | -1.03459963 | down |
| novel_miR_431 | 173.953381 | 277.817261 | 81.679327  | 299.184979 | 388.883128 | 308.870769 | 0.0176173  | 0.15859478 | 0.722194154 | up   |
| miR8565d      | 1426.41772 | 2177.31202 | 1065.09842 | 3222.25661 | 2399.96445 | 2553.33169 | 0.01775842 | 0.15859478 | 0.589107991 | up   |
| miR8032f_3p   | 89.8759133 | 142.139064 | 91.4808462 | 68.7781561 | 88.887572  | 72.069846  | 0.0204301  | 0.17128081 | -0.73555345 | down |
| miR7994a      | 246.433956 | 368.269392 | 235.236462 | 605.247773 | 633.323951 | 288.279384 | 0.02099145 | 0.17171696 | 0.631452312 | up   |
| novel_miR_150 | 40.5891221 | 77.5303984 | 42.47325   | 127.239589 | 107.405816 | 72.069846  | 0.02421348 | 0.18495476 | 0.799435066 | up   |
| miR951        | 162.356489 | 290.738994 | 107.816712 | 154.750851 | 107.405816 | 133.844    | 0.02446296 | 0.18495476 | -0.69752873 | down |
| miR164e_5p_3  | 43.4883451 | 45.2260657 | 49.0075962 | 92.8505107 | 99.9985185 | 113.252615 | 0.02634025 | 0.19109398 | 0.756720901 | up   |
| miR164e_5p_2  | 43.4883451 | 45.2260657 | 49.0075962 | 92.8505107 | 99.9985185 | 113.252615 | 0.0268365  | 0.19109398 | 0.757229161 | up   |
| miR1516a_5p   | 159.457266 | 465.18239  | 130.686923 | 632.759036 | 344.439342 | 380.940614 | 0.0298945  | 0.20434733 | 0.737413215 | up   |
| novel_miR_437 | 63.7829062 | 200.286863 | 137.221269 | 92.8505107 | 99.9985185 | 82.3655383 | 0.03333428 | 0.20988663 | -0.72075913 | down |
| miR164e_5p_1  | 43.4883451 | 45.2260657 | 49.0075962 | 89.4116029 | 99.9985185 | 113.252615 | 0.03355521 | 0.20988663 | 0.73741028  | up   |
| miR164e_5p_4  | 43.4883451 | 45.2260657 | 49.0075962 | 89.4116029 | 99.9985185 | 113.252615 | 0.03364916 | 0.20988663 | 0.73749685  | up   |
| miR394d       | 301.519193 | 193.825996 | 411.663808 | 1251.76244 | 396.290425 | 535.375999 | 0.0349353  | 0.21126388 | 0.883926599 | up   |
| miR5770a      | 211.64328  | 355.347659 | 124.152577 | 491.763816 | 288.884609 | 442.714768 | 0.03678822 | 0.21853957 | 0.626160554 | up   |
| miR172d_2     | 133.364258 | 116.295598 | 166.625827 | 247.601362 | 299.995556 | 257.392307 | 0.04865205 | 0.25555128 | 0.593718429 | up   |
| miR172d_1     | 133.364258 | 116.295598 | 166.625827 | 247.601362 | 299.995556 | 257.392307 | 0.04916835 | 0.25557299 | 0.593829576 | up   |
