# Supplementary material for: RNA sequencing-based exploration of the effects of far-red light on microRNAs involved in the shade-avoidance response of D. officinale
Source: PeerJ journal article supplement (doi:10.7717/peerj.15001), 2023-03-20
Supplement: Table_S5.pdf [file Table_S5.pdf]

Table S5 The TPM value of differentially expressed miRNAs of *D. officinale* under different light treatments

| #ID           | CK1         | CK2         | CK3         | FR2-1       | FR2-2       | FR2-3       | FR8-1       | FR8-2       | FR8-3       |
|---------------|-------------|-------------|-------------|-------------|-------------|-------------|-------------|-------------|-------------|
| miR5523       | 0           | 6.460866531 | 0           | 3.258666423 | 30.005476   | 12.5450839  | 0           | 3.703648835 | 0           |
| miR399b_1     | 26794.61904 | 28815.46473 | 37833.86425 | 9235.060644 | 9673.015325 | 11550.886   | 29729.35796 | 38232.76692 | 36868.87406 |
| miR1520f_5p_1 | 1342.340253 | 2209.616354 | 1006.289308 | 1081.877253 | 1297.736837 | 1292.143641 | 1299.907149 | 1785.158738 | 1245.778766 |
| miR172k       | 429.0850052 | 348.8867927 | 787.3887119 | 3180.458429 | 1582.788859 | 310.4908264 | 918.1883834 | 744.4334158 | 648.6286138 |
| miR530a       | 95.67435927 | 122.7564641 | 104.5495385 | 286.7626453 | 228.7917545 | 297.9457425 | 230.4068228 | 303.6992045 | 216.2095379 |
| miR4387e      | 78.27902122 | 96.91299797 | 120.8854039 | 202.0373182 | 168.7808025 | 517.4847107 | 220.0900994 | 118.5167627 | 133.8439997 |
| miR6274a      | 434.8834512 | 620.243187  | 388.7935963 | 397.5573036 | 476.3369315 | 479.849459  | 598.3699577 | 859.2465297 | 689.8113829 |
| miR8565d      | 1426.41772  | 2177.312021 | 1065.098424 | 2127.909174 | 2921.783225 | 3299.357064 | 3222.256611 | 2399.964445 | 2553.331686 |
| miR6105b      | 217.4417256 | 303.660727  | 307.1142694 | 583.3012898 | 566.3533595 | 564.5287753 | 330.1351491 | 433.3269137 | 380.9406144 |
| miR396b_3     | 2858.633886 | 3327.346264 | 3518.745406 | 8560.516694 | 6953.769063 | 5341.069468 | 5598.541903 | 5577.695145 | 5981.797216 |
| miR812o_5p_2  | 130.4650354 | 258.4346613 | 166.625827  | 211.8133175 | 311.3068135 | 228.9477811 | 154.7508511 | 85.1839232  | 61.77415369 |
| miR6297a      | 110.1704743 | 129.2173306 | 107.8167116 | 146.6399891 | 217.539701  | 203.8576133 | 130.6784965 | 107.4058162 | 41.18276913 |
| miR408_5p     | 49.28679114 | 142.1390637 | 179.6945193 | 104.2773255 | 41.2575295  | 31.36270974 | 140.9952199 | 207.4043348 | 154.4353842 |
| miR164e_5p_2  | 43.48834512 | 45.22606572 | 49.00759618 | 101.0186591 | 93.7671125  | 65.86169045 | 92.85051068 | 99.99851854 | 113.2526151 |
| miR396b_1     | 1991.766207 | 2610.190079 | 2633.341501 | 6429.348853 | 6079.859574 | 4710.679003 | 4879.810172 | 4699.930371 | 4838.975373 |
| miR6151c      | 37.68989911 | 122.7564641 | 68.61063465 | 169.450654  | 138.7753265 | 147.4047358 | 127.2395887 | 74.0729767  | 41.18276913 |
| miR164e_5p_1  | 43.48834512 | 45.22606572 | 49.00759618 | 101.0186591 | 97.517797   | 65.86169045 | 89.41160287 | 99.99851854 | 113.2526151 |
| miR951        | 162.3564885 | 290.7389939 | 107.8167116 | 143.3813226 | 191.2849095 | 232.0840521 | 154.7508511 | 107.4058162 | 133.8439997 |
| miR8032f_3p   | 89.87591326 | 142.1390637 | 91.4808462  | 149.8986555 | 123.7725885 | 131.7233809 | 68.77815606 | 88.88757204 | 72.06984598 |
| miR395m       | 21373.07202 | 12295.02901 | 20380.62566 | 5533.215587 | 5029.667914 | 8427.160107 | 2696.103717 | 2666.627161 | 1904.703072 |
| miR396b_3p    | 37284.00789 | 36445.7481  | 32717.47121 | 141517.3654 | 68082.42504 | 65996.5501  | 55902.88524 | 55113.99831 | 46783.62573 |
| miR7994a      | 246.4339557 | 368.2693923 | 235.2364617 | 524.6452942 | 491.3396695 | 558.2562333 | 605.2477733 | 633.3239508 | 288.2793839 |
| miR4383_1     | 168.1549345 | 277.8172609 | 186.2288655 | 166.1919876 | 285.052022  | 269.7193037 | 281.9904398 | 362.9575858 | 360.3492299 |
| miR164e_5p_3  | 43.48834512 | 45.22606572 | 49.00759618 | 101.0186591 | 93.7671125  | 65.86169045 | 92.85051068 | 99.99851854 | 113.2526151 |
| miR399t_3p    | 3722.602343 | 1376.164571 | 1715.265866 | 5474.559591 | 4474.566608 | 4139.877685 | 27738.23034 | 41099.39112 | 37393.95437 |
| miR812o_5p_1  | 130.4650354 | 258.4346613 | 166.625827  | 211.8133175 | 311.3068135 | 228.9477811 | 154.7508511 | 85.1839232  | 61.77415369 |

|              |             |             |             |             |             |             |             |             |             |
|--------------|-------------|-------------|-------------|-------------|-------------|-------------|-------------|-------------|-------------|
| miR5770a     | 211.6432796 | 355.3476592 | 124.152577  | 312.8319766 | 416.3259795 | 746.4324918 | 491.7638158 | 288.8846091 | 442.7147681 |
| miR172d_2    | 133.3642584 | 116.2955976 | 166.625827  | 668.0266168 | 262.547915  | 185.0399875 | 247.6013618 | 299.9955556 | 257.3923071 |
| miR393b_3p   | 2272.990838 | 3837.75472  | 2192.273136 | 5754.804904 | 6548.695137 | 5557.472166 | 5928.677052 | 5503.622169 | 4519.808912 |
| miR159k_3p_2 | 16183.46283 | 12857.1244  | 17397.69664 | 11695.35379 | 11998.43972 | 15819.35079 | 17308.02297 | 16514.57015 | 19572.11103 |
| miR159k_3p_1 | 16183.46283 | 12857.1244  | 17397.69664 | 11695.35379 | 11998.43972 | 15819.35079 | 17308.02297 | 16514.57015 | 19572.11103 |
| miR5302b_3p  | 220.3409486 | 335.9650596 | 271.1753655 | 364.9706394 | 626.3643115 | 407.7152266 | 285.4293476 | 296.2919068 | 185.3224611 |
| miR827       | 805.9839963 | 581.4779878 | 1228.457078 | 1766.197201 | 1447.764217 | 1160.42026  | 4704.425874 | 4922.149301 | 5827.361832 |
| miR164e_5p_4 | 43.48834512 | 45.22606572 | 49.00759618 | 101.0186591 | 97.517797   | 65.86169045 | 89.41160287 | 99.99851854 | 113.2526151 |
| miR171       | 156.5580424 | 167.9825298 | 205.8319039 | 175.9679869 | 150.02738   | 203.8576133 | 409.2300285 | 255.5517696 | 247.0966148 |
| miR396b_2    | 2841.238548 | 3346.728863 | 3505.676713 | 8518.154031 | 6946.267694 | 5278.344049 | 5591.664087 | 5562.88055  | 5971.501524 |
| miR395b      | 78299.31578 | 38952.56432 | 61203.95328 | 13966.64429 | 17721.98426 | 8721.969578 | 7544.96372  | 6633.235063 | 3366.691376 |
| miR857       | 318.9145309 | 445.7997907 | 542.350731  | 423.626635  | 412.575295  | 241.492865  | 478.0081846 | 329.6247463 | 453.0104604 |
| miR7532a     | 516.0616955 | 962.6691132 | 467.2057502 | 1551.125218 | 2047.873737 | 2095.029011 | 1124.522852 | 911.0976134 | 823.6553826 |
| miR6019a     | 292.8215238 | 445.7997907 | 209.099077  | 469.247965  | 667.621841  | 865.6107888 | 591.4921421 | 511.1035392 | 442.7147681 |
| miR528_5p    | 1139.394642 | 3773.146054 | 5126.19456  | 1036.255923 | 423.8273485 | 627.2541948 | 1478.730355 | 2374.038903 | 2090.025533 |
| miR157d_3p   | 66.68212919 | 64.60866531 | 94.74801928 | 221.5893168 | 63.7616365  | 169.3586326 | 27.51126242 | 44.44378602 | 61.77415369 |
| miR399b_2    | 3951.64096  | 2784.633475 | 3469.737809 | 5422.420928 | 4264.528276 | 3224.086561 | 15760.51446 | 21907.08286 | 16370.15073 |
| miR399e_5p_2 | 420.3873362 | 639.6257866 | 346.3203463 | 935.2372635 | 1654.051864 | 1878.626313 | 1413.391107 | 929.6158575 | 761.8812289 |
| miR7729a_3p  | 339.209092  | 387.6519919 | 336.5188271 | 413.8506358 | 382.569819  | 388.8976008 | 770.3153478 | 607.3984089 | 483.8975373 |
| miR399c_5p   | 185.5502725 | 71.06953185 | 147.0227885 | 547.4559591 | 131.2739575 | 72.1342324  | 440.1801988 | 966.6523459 | 669.2199984 |
| miR394d      | 301.5191929 | 193.8259959 | 411.6638079 | 540.9386263 | 225.04107   | 338.7172652 | 1251.76244  | 396.2904253 | 535.3759987 |
| miR1516a_5p  | 159.4572655 | 465.1823903 | 130.6869231 | 394.2986372 | 551.3506215 | 780.9314725 | 632.7590357 | 344.4393416 | 380.9406144 |
| miR172d_1    | 133.3642584 | 116.2955976 | 166.625827  | 668.0266168 | 262.547915  | 185.0399875 | 247.6013618 | 299.9955556 | 257.3923071 |

---
