# Supplementary material for: RNA sequencing-based exploration of the effects of far-red light on microRNAs involved in the shade-avoidance response of D. officinale
Source: PeerJ journal article supplement (doi:10.7717/peerj.15001), 2023-03-20
Supplement: Table_S6.pdf [file Table_S6.pdf]

Table S6 The TPM value of differentially expressed novel miRNAs of *D. officinale* under different light treatments

| #ID          | CK1         | CK2         | CK3         | FR2-1       | FR2-2       | FR2-3       | FR8-1       | FR8-2       | FR8-3       |
|--------------|-------------|-------------|-------------|-------------|-------------|-------------|-------------|-------------|-------------|
| novel_miR_1  | 1113.301635 | 1369.703705 | 901.7397697 | 811.4079394 | 1046.440975 | 1041.241963 | 1017.91671  | 1103.687353 | 1008.977844 |
| novel_miR_10 | 205.8448336 | 161.5216633 | 150.2899616 | 348.6773073 | 341.3122895 | 254.0379489 | 151.3119433 | 207.4043348 | 205.9138456 |
| novel_miR_11 | 495.7671344 | 704.2344519 | 450.8698848 | 355.1946401 | 476.3369315 | 639.7992787 | 636.1979435 | 677.7677368 | 628.0372292 |
| novel_miR_14 | 872.6661255 | 839.9126491 | 810.2589235 | 1231.775908 | 836.4026435 | 1116.512467 | 1447.780185 | 1755.529548 | 1441.39692  |
| novel_miR_14 | 1954.076308 | 2952.616005 | 1300.334885 | 2290.842496 | 3544.396852 | 4212.011918 | 4253.928952 | 3870.313032 | 3572.605222 |
| novel_miR_14 | 246.4339557 | 303.660727  | 202.5647309 | 492.0586299 | 435.079402  | 401.4426846 | 240.7235462 | 348.1429905 | 195.6181534 |
| novel_miR_15 | 40.58912212 | 77.53039838 | 42.47325002 | 97.7599927  | 123.7725885 | 125.450839  | 127.2395887 | 107.4058162 | 72.06984598 |
| novel_miR_15 | 649.4259538 | 678.3909858 | 676.3048272 | 651.7332847 | 483.8383005 | 661.7531755 | 433.3023832 | 555.5473252 | 391.2363067 |
| novel_miR_16 | 185.5502725 | 316.58246   | 127.4197501 | 316.0906431 | 363.8163965 | 310.4908264 | 147.8730355 | 211.1079836 | 185.3224611 |
| novel_miR_16 | 171.0541575 | 135.6781972 | 212.3662501 | 195.5199854 | 101.2684815 | 166.2223616 | 244.162454  | 196.2933882 | 216.2095379 |
| novel_miR_17 | 110.1704743 | 161.5216633 | 120.8854039 | 172.7093204 | 300.05476   | 439.0779363 | 302.6238867 | 177.7751441 | 113.2526151 |
| novel_miR_18 | 10518.38107 | 14142.83684 | 10360.20583 | 7631.796763 | 10561.92755 | 11820.6053  | 12032.7384  | 10647.9904  | 15144.96335 |
| novel_miR_18 | 4108.199003 | 2829.859541 | 1535.571347 | 280.2453124 | 266.2985995 | 272.8555747 | 433.3023832 | 529.6217834 | 617.7415369 |
| novel_miR_19 | 1113.301635 | 1369.703705 | 901.7397697 | 811.4079394 | 1046.440975 | 1041.241963 | 1017.91671  | 1103.687353 | 1008.977844 |
| novel_miR_19 | 301.5191929 | 497.4867229 | 326.7173078 | 602.8532883 | 1057.693029 | 969.1077309 | 880.3603975 | 685.1750344 | 730.994152  |
| novel_miR_20 | 75.37979821 | 96.91299797 | 65.34346157 | 211.8133175 | 191.2849095 | 175.6311745 | 123.8006809 | 92.59122087 | 72.06984598 |
| novel_miR_20 | 437.7826742 | 600.8605874 | 483.5416156 | 1818.335864 | 1601.542281 | 947.1538341 | 839.0935039 | 907.3939645 | 689.8113829 |
| novel_miR_20 | 371.1005451 | 885.1387148 | 490.0759618 | 443.1786336 | 618.8629425 | 495.5308139 | 639.6368513 | 774.0626065 | 751.5855366 |
| novel_miR_21 | 405.8912212 | 562.0953882 | 375.724904  | 338.901308  | 480.087616  | 316.7633684 | 326.6962413 | 381.47583   | 391.2363067 |
| novel_miR_22 | 582.7438247 | 859.2952487 | 483.5416156 | 410.5919693 | 528.8465145 | 749.5687627 | 739.3651776 | 759.2480111 | 700.1070752 |
| novel_miR_22 | 86.97669025 | 193.8259959 | 65.34346157 | 149.8986555 | 232.542439  | 332.4447232 | 233.8457306 | 185.1824417 | 257.3923071 |
| novel_miR_23 | 287.0230778 | 458.7215237 | 209.099077  | 117.3119912 | 273.7999685 | 366.9437039 | 371.4020427 | 244.4408231 | 494.1932296 |
| novel_miR_23 | 118.8681433 | 445.7997907 | 173.1601732 | 286.7626453 | 641.3670495 | 646.0718206 | 402.3522129 | 166.6641976 | 154.4353842 |
| novel_miR_23 | 197.1471646 | 310.1215935 | 133.9540962 | 329.1253088 | 420.076664  | 586.4826721 | 502.0805392 | 385.1794788 | 298.5750762 |
| novel_miR_24 | 565.3484866 | 439.3389241 | 614.2285388 | 648.4746182 | 408.8246105 | 332.4447232 | 316.3795179 | 403.697723  | 277.9836916 |
| novel_miR_24 | 46.38756813 | 32.30433266 | 19.60303847 | 110.7946584 | 82.515059   | 75.27050337 | 116.9228653 | 129.6277092 | 154.4353842 |

|              |             |             |             |             |             |             |             |             |             |
|--------------|-------------|-------------|-------------|-------------|-------------|-------------|-------------|-------------|-------------|
| novel_miR_25 | 371.1005451 | 471.6432568 | 329.9844809 | 319.3493095 | 390.071188  | 435.9416654 | 550.2252485 | 570.3619206 | 555.9673832 |
| novel_miR_26 | 576.9453786 | 239.0520617 | 686.1063465 | 42.3626635  | 22.504107   | 56.45287753 | 34.38907803 | 37.03648835 | 102.9569228 |
| novel_miR_26 | 431.9842282 | 639.6257866 | 447.6027118 | 1107.946584 | 1391.503949 | 1301.552454 | 1272.395887 | 1244.426009 | 1204.595997 |
| novel_miR_27 | 1110.402412 | 1027.277778 | 1003.022135 | 1254.586573 | 1391.503949 | 1110.239925 | 832.2156883 | 796.2844995 | 782.4726135 |
| novel_miR_28 | 1942.479416 | 1473.077569 | 2646.410194 | 1906.319858 | 967.676601  | 1317.233809 | 1217.373362 | 1133.316543 | 2491.557532 |
| novel_miR_28 | 1110.402412 | 1369.703705 | 901.7397697 | 811.4079394 | 1050.19166  | 1056.923318 | 1017.91671  | 1103.687353 | 1008.977844 |
| novel_miR_29 | 98.57358228 | 167.9825298 | 68.61063465 | 55.3973292  | 153.7780645 | 87.81558727 | 147.8730355 | 155.5532511 | 123.5483074 |
| novel_miR_30 | 539.2554795 | 736.5387846 | 450.8698848 | 443.1786336 | 851.4053815 | 733.8874079 | 1059.183603 | 840.7282855 | 823.6553826 |
| novel_miR_30 | 150.7595964 | 109.834731  | 78.41215388 | 123.8293241 | 183.7835405 | 188.1762584 | 288.8682554 | 270.3663649 | 236.8009225 |
| novel_miR_30 | 371.1005451 | 471.6432568 | 329.9844809 | 319.3493095 | 390.071188  | 435.9416654 | 550.2252485 | 570.3619206 | 555.9673832 |
| novel_miR_32 | 188.4494955 | 161.5216633 | 147.0227885 | 332.3839752 | 307.556129  | 260.3104908 | 151.3119433 | 196.2933882 | 195.6181534 |
| novel_miR_36 | 197.1471646 | 129.2173306 | 173.1601732 | 198.7786518 | 135.024642  | 137.9959228 | 285.4293476 | 225.9225789 | 1153.117536 |
| novel_miR_37 | 101.4728053 | 361.8085258 | 147.0227885 | 276.986646  | 401.3232415 | 410.8514976 | 281.9904398 | 155.5532511 | 175.0267688 |
| novel_miR_37 | 316.0153079 | 652.5475197 | 509.6790002 | 772.3039423 | 918.9177025 | 658.6169045 | 515.8361704 | 429.6232648 | 401.531999  |
| novel_miR_38 | 318.9145309 | 594.3997209 | 290.778404  | 449.6959664 | 903.9149645 | 812.2941822 | 890.6771209 | 803.6917972 | 720.6984598 |
| novel_miR_39 | 576.9453786 | 239.0520617 | 686.1063465 | 42.3626635  | 22.504107   | 56.45287753 | 34.38907803 | 37.03648835 | 102.9569228 |
| novel_miR_40 | 316.0153079 | 568.5562548 | 382.2592502 | 700.613281  | 765.139638  | 975.3802729 | 835.6545961 | 755.5443623 | 803.063998  |
| novel_miR_41 | 423.2865592 | 542.7127886 | 267.9081924 | 208.5546511 | 390.071188  | 454.7592912 | 395.4743973 | 333.3283951 | 339.7578453 |
| novel_miR_41 | 411.6896672 | 516.8693225 | 463.9385771 | 1635.850545 | 1425.26011  | 859.3382468 | 804.7044259 | 829.617339  | 638.3329215 |
| novel_miR_41 | 171.0541575 | 135.6781972 | 212.3662501 | 195.5199854 | 101.2684815 | 166.2223616 | 244.162454  | 196.2933882 | 216.2095379 |
| novel_miR_42 | 408.7904442 | 510.408456  | 454.1370579 | 1622.815879 | 1406.506687 | 856.2019759 | 787.5098869 | 837.0246367 | 638.3329215 |
| novel_miR_42 | 287.0230778 | 368.2693923 | 186.2288655 | 492.0586299 | 705.128686  | 539.4386075 | 464.2525534 | 496.2889439 | 267.6879993 |
| novel_miR_43 | 173.9533805 | 277.8172609 | 81.67932696 | 270.4693131 | 337.561605  | 301.0820135 | 299.1849789 | 388.8831277 | 308.8707685 |
| novel_miR_43 | 1295.952685 | 1279.251573 | 1368.94552  | 1199.189244 | 1297.736837 | 2007.213423 | 2335.018398 | 1796.269685 | 2388.60061  |
| novel_miR_43 | 63.78290618 | 200.2868625 | 137.2212693 | 185.7439861 | 191.2849095 | 197.5850714 | 92.85051068 | 99.99851854 | 82.36553826 |
| novel_miR_44 | 1110.402412 | 1369.703705 | 901.7397697 | 811.4079394 | 1046.440975 | 1041.241963 | 1017.91671  | 1099.983704 | 1008.977844 |
| novel_miR_45 | 81.17824423 | 122.7564641 | 49.00759618 | 162.9333212 | 195.035594  | 250.9016779 | 361.0853193 | 292.588258  | 123.5483074 |
| novel_miR_45 | 1725.03769  | 1977.025159 | 1502.899616 | 1000.410592 | 1368.999842 | 1555.590403 | 1815.74332  | 1855.528066 | 1523.762458 |

|              |             |             |             |             |             |             |             |             |             |
|--------------|-------------|-------------|-------------|-------------|-------------|-------------|-------------|-------------|-------------|
| novel_miR_45 | 1203.177548 | 1318.016772 | 931.1443274 | 1815.077198 | 2389.186026 | 2430.610005 | 2386.602015 | 2448.11188  | 2234.165225 |
| novel_miR_46 | 371.1005451 | 471.6432568 | 329.9844809 | 319.3493095 | 390.071188  | 435.9416654 | 550.2252485 | 570.3619206 | 555.9673832 |
| novel_miR_48 | 1116.200858 | 814.069183  | 604.4270195 | 1081.877253 | 1106.451927 | 1332.915164 | 2114.928299 | 2996.251907 | 2913.680916 |
| novel_miR_48 | 191966.253  | 83881.43018 | 180681.2056 | 11551.97247 | 10651.94398 | 13946.99702 | 12957.8046  | 14840.52088 | 58294.2097  |
| novel_miR_48 | 2139.62658  | 3760.224321 | 1620.517847 | 1922.61319  | 2659.23531  | 2653.285244 | 3332.301661 | 3359.209493 | 3232.847377 |
| novel_miR_49 | 63.78290618 | 174.4433963 | 71.87780773 | 205.2959847 | 288.8027065 | 188.1762584 | 123.8006809 | 151.8496022 | 102.9569228 |
| novel_miR_50 | 231.9378407 | 303.660727  | 267.9081924 | 658.2506175 | 547.599937  | 498.6670848 | 481.4470924 | 362.9575858 | 216.2095379 |
| novel_miR_50 | 1942.479416 | 1473.077569 | 2646.410194 | 1906.319858 | 967.676601  | 1317.233809 | 1217.373362 | 1133.316543 | 2491.557532 |
| novel_miR_53 | 50530.55781 | 28130.61288 | 43002.53206 | 6670.490169 | 5044.670652 | 7276.148659 | 6086.866811 | 4459.193197 | 27561.56824 |
| novel_miR_71 | 46.38756813 | 32.30433266 | 19.60303847 | 110.7946584 | 82.515059   | 75.27050337 | 116.9228653 | 129.6277092 | 154.4353842 |
| novel_miR_73 | 118.8681433 | 142.1390637 | 39.20607694 | 78.20799416 | 105.019166  | 128.5871099 | 185.7010214 | 155.5532511 | 113.2526151 |
| novel_miR_83 | 817.5808883 | 788.2257168 | 754.7169811 | 1160.085247 | 757.638269  | 1050.650776 | 1396.196568 | 1674.049273 | 1389.918458 |
| novel_miR_87 | 1113.301635 | 1382.625438 | 905.0069427 | 821.1839387 | 1042.690291 | 1047.514505 | 1017.91671  | 1111.09465  | 1008.977844 |
| novel_miR_97 | 1962.773977 | 2345.294551 | 1672.792616 | 1306.725236 | 1920.350464 | 1819.037165 | 2101.172668 | 2262.929438 | 1832.633226 |
| novel_miR_99 | 313.1160849 | 555.6345217 | 336.5188271 | 599.5946219 | 1267.731361 | 655.4806335 | 677.4648372 | 737.0261181 | 576.5587678 |
