# Supplementary material for: RNA sequencing-based exploration of the effects of far-red light on microRNAs involved in the shade-avoidance response of D. officinale
Source: PeerJ journal article supplement (doi:10.7717/peerj.15001), 2023-03-20
Supplement: Table_S7.pdf [file Table_S7.pdf]

Table S7 Interaction miRNAs and mRNAs of FR2-CK

| miRNA ID      | log <sub>2</sub> FC | Targets             |
|---------------|---------------------|---------------------|
| novel_miR_189 | -3.824935034        | gene-MA16_Dca023326 |
| novel_miR_189 | -3.824935034        | gene-MA16_Dca011459 |
| novel_miR_189 | -3.824935034        | gene-MA16_Dca010804 |
| novel_miR_189 | -3.824935034        | gene-MA16_Dca024400 |
| novel_miR_189 | -3.824935034        | gene-MA16_Dca022787 |
| novel_miR_189 | -3.824935034        | gene-MA16_Dca025882 |
| novel_miR_189 | -3.824935034        | gene-MA16_Dca015722 |
| novel_miR_189 | -3.824935034        | gene-MA16_Dca014786 |
| novel_miR_189 | -3.824935034        | gene-MA16_Dca026995 |
| novel_miR_189 | -3.824935034        | gene-MA16_Dca004836 |
| novel_miR_189 | -3.824935034        | gene-MA16_Dca001649 |
| novel_miR_189 | -3.824935034        | gene-MA16_Dca018219 |
| novel_miR_189 | -3.824935034        | gene-MA16_Dca010516 |
| novel_miR_189 | -3.824935034        | gene-MA16_Dca024704 |
| novel_miR_189 | -3.824935034        | gene-MA16_Dca024902 |
| novel_miR_189 | -3.824935034        | gene-MA16_Dca001622 |
| novel_miR_189 | -3.824935034        | gene-MA16_Dca021278 |
| novel_miR_189 | -3.824935034        | gene-MA16_Dca022838 |
| novel_miR_189 | -3.824935034        | gene-MA16_Dca022812 |
| novel_miR_189 | -3.824935034        | gene-MA16_Dca005118 |
| novel_miR_189 | -3.824935034        | gene-MA16_Dca011344 |
| novel_miR_189 | -3.824935034        | gene-MA16_Dca017709 |
| novel_miR_189 | -3.824935034        | gene-MA16_Dca018325 |
| novel_miR_189 | -3.824935034        | gene-MA16_Dca003816 |
| novel_miR_189 | -3.824935034        | gene-MA16_Dca014554 |
| novel_miR_189 | -3.824935034        | gene-MA16_Dca018212 |
| novel_miR_189 | -3.824935034        | gene-MA16_Dca010241 |
| novel_miR_189 | -3.824935034        | gene-MA16_Dca005791 |
| novel_miR_189 | -3.824935034        | gene-MA16_Dca002499 |
| novel_miR_189 | -3.824935034        | gene-MA16_Dca013892 |
| novel_miR_189 | -3.824935034        | gene-MA16_Dca000024 |
| novel_miR_189 | -3.824935034        | gene-MA16_Dca009944 |
| novel_miR_189 | -3.824935034        | gene-MA16_Dca003956 |
| novel_miR_189 | -3.824935034        | gene-MA16_Dca028126 |
| novel_miR_189 | -3.824935034        | gene-MA16_Dca024385 |
| novel_miR_189 | -3.824935034        | gene-MA16_Dca014761 |
| novel_miR_189 | -3.824935034        | gene-MA16_Dca021441 |
| novel_miR_189 | -3.824935034        | gene-MA16_Dca009034 |
| novel_miR_189 | -3.824935034        | gene-MA16_Dca003052 |
| novel_miR_189 | -3.824935034        | gene-MA16_Dca027145 |
| novel_miR_189 | -3.824935034        | gene-MA16_Dca014804 |
| novel_miR_189 | -3.824935034        | gene-MA16_Dca021649 |
| novel_miR_189 | -3.824935034        | gene-MA16_Dca010408 |
| novel_miR_189 | -3.824935034        | gene-MA16_Dca011938 |

|               |              |                     |
|---------------|--------------|---------------------|
| novel_miR_189 | -3.824935034 | gene-MA16_Dca003122 |
| novel_miR_189 | -3.824935034 | gene-MA16_Dca010402 |
| novel_miR_189 | -3.824935034 | gene-MA16_Dca016865 |
| novel_miR_189 | -3.824935034 | gene-MA16_Dca011525 |
| novel_miR_189 | -3.824935034 | gene-MA16_Dca001400 |
| novel_miR_189 | -3.824935034 | gene-MA16_Dca007799 |
| novel_miR_189 | -3.824935034 | gene-MA16_Dca010456 |
| novel_miR_189 | -3.824935034 | gene-MA16_Dca013722 |
| novel_miR_189 | -3.824935034 | gene-MA16_Dca005175 |
| novel_miR_189 | -3.824935034 | gene-MA16_Dca008000 |
| novel_miR_189 | -3.824935034 | gene-MA16_Dca013243 |
| novel_miR_189 | -3.824935034 | gene-MA16_Dca026494 |
| novel_miR_484 | -4.204864689 | gene-MA16_Dca013703 |
| novel_miR_484 | -4.204864689 | gene-MA16_Dca011847 |
| novel_miR_484 | -4.204864689 | gene-MA16_Dca028665 |
| novel_miR_484 | -4.204864689 | gene-MA16_Dca022384 |
| novel_miR_484 | -4.204864689 | gene-MA16_Dca018928 |
| novel_miR_484 | -4.204864689 | gene-MA16_Dca013338 |
| novel_miR_484 | -4.204864689 | gene-MA16_Dca009144 |
| novel_miR_484 | -4.204864689 | gene-MA16_Dca015180 |
| novel_miR_484 | -4.204864689 | gene-MA16_Dca027734 |
| novel_miR_484 | -4.204864689 | gene-MA16_Dca019875 |
| novel_miR_484 | -4.204864689 | gene-MA16_Dca016458 |
| novel_miR_484 | -4.204864689 | gene-MA16_Dca016490 |
| novel_miR_484 | -4.204864689 | gene-MA16_Dca019561 |
| novel_miR_484 | -4.204864689 | gene-MA16_Dca006494 |
| novel_miR_484 | -4.204864689 | gene-MA16_Dca015083 |
| novel_miR_484 | -4.204864689 | gene-MA16_Dca011199 |
| novel_miR_484 | -4.204864689 | gene-MA16_Dca022649 |
| novel_miR_484 | -4.204864689 | gene-MA16_Dca014915 |
| novel_miR_484 | -4.204864689 | gene-MA16_Dca010212 |
| novel_miR_484 | -4.204864689 | gene-MA16_Dca008125 |
| novel_miR_484 | -4.204864689 | gene-MA16_Dca017780 |
| novel_miR_484 | -4.204864689 | gene-MA16_Dca019194 |
| novel_miR_484 | -4.204864689 | gene-MA16_Dca008674 |
| novel_miR_484 | -4.204864689 | gene-MA16_Dca016409 |
| novel_miR_484 | -4.204864689 | gene-MA16_Dca017451 |
| novel_miR_484 | -4.204864689 | gene-MA16_Dca021955 |
| novel_miR_484 | -4.204864689 | gene-MA16_Dca021243 |
| novel_miR_484 | -4.204864689 | gene-MA16_Dca027391 |
| novel_miR_484 | -4.204864689 | gene-MA16_Dca018115 |
| novel_miR_484 | -4.204864689 | gene-MA16_Dca000965 |
| novel_miR_484 | -4.204864689 | gene-MA16_Dca006776 |
| novel_miR_484 | -4.204864689 | gene-MA16_Dca007667 |
| novel_miR_484 | -4.204864689 | gene-MA16_Dca003224 |
| novel_miR_484 | -4.204864689 | gene-MA16_Dca004503 |

|               |              |                     |
|---------------|--------------|---------------------|
| novel_miR_484 | -4.204864689 | gene-MA16_Dca023412 |
| novel_miR_484 | -4.204864689 | gene-MA16_Dca012030 |
| novel_miR_484 | -4.204864689 | gene-MA16_Dca020389 |
| novel_miR_484 | -4.204864689 | gene-MA16_Dca028340 |
| novel_miR_484 | -4.204864689 | gene-MA16_Dca002133 |
| novel_miR_484 | -4.204864689 | gene-MA16_Dca007417 |
| novel_miR_484 | -4.204864689 | gene-MA16_Dca012435 |
| novel_miR_484 | -4.204864689 | gene-MA16_Dca015045 |
| novel_miR_484 | -4.204864689 | gene-MA16_Dca019567 |
| novel_miR_484 | -4.204864689 | gene-MA16_Dca001581 |
| novel_miR_484 | -4.204864689 | gene-MA16_Dca022185 |
| novel_miR_484 | -4.204864689 | gene-MA16_Dca009281 |
| novel_miR_484 | -4.204864689 | gene-MA16_Dca028824 |
| novel_miR_484 | -4.204864689 | gene-MA16_Dca011516 |
| novel_miR_484 | -4.204864689 | gene-MA16_Dca011253 |
| novel_miR_484 | -4.204864689 | gene-MA16_Dca015359 |
| novel_miR_484 | -4.204864689 | gene-MA16_Dca002926 |
| novel_miR_484 | -4.204864689 | gene-MA16_Dca005762 |
| novel_miR_484 | -4.204864689 | gene-MA16_Dca017160 |
| novel_miR_484 | -4.204864689 | gene-MA16_Dca022638 |
| novel_miR_484 | -4.204864689 | gene-MA16_Dca015933 |
| novel_miR_484 | -4.204864689 | gene-MA16_Dca016882 |
| novel_miR_484 | -4.204864689 | gene-MA16_Dca025576 |
| novel_miR_484 | -4.204864689 | gene-MA16_Dca008661 |
| novel_miR_484 | -4.204864689 | gene-MA16_Dca010144 |
| novel_miR_484 | -4.204864689 | gene-MA16_Dca008955 |
| novel_miR_484 | -4.204864689 | gene-MA16_Dca013055 |
| novel_miR_484 | -4.204864689 | gene-MA16_Dca016304 |
| novel_miR_484 | -4.204864689 | gene-MA16_Dca024277 |
| novel_miR_484 | -4.204864689 | gene-MA16_Dca019975 |
| novel_miR_484 | -4.204864689 | gene-MA16_Dca003651 |
| novel_miR_484 | -4.204864689 | gene-MA16_Dca017446 |
| novel_miR_484 | -4.204864689 | gene-MA16_Dca013631 |
| novel_miR_484 | -4.204864689 | gene-MA16_Dca000685 |
| novel_miR_484 | -4.204864689 | gene-MA16_Dca014673 |
| novel_miR_484 | -4.204864689 | gene-MA16_Dca018194 |
| novel_miR_484 | -4.204864689 | gene-MA16_Dca006033 |
| novel_miR_484 | -4.204864689 | gene-MA16_Dca001538 |
| novel_miR_484 | -4.204864689 | gene-MA16_Dca026681 |
| novel_miR_484 | -4.204864689 | gene-MA16_Dca025504 |
| novel_miR_484 | -4.204864689 | gene-MA16_Dca006006 |
| novel_miR_484 | -4.204864689 | gene-MA16_Dca019891 |
| novel_miR_484 | -4.204864689 | gene-MA16_Dca020179 |
| novel_miR_484 | -4.204864689 | gene-MA16_Dca015057 |
| novel_miR_484 | -4.204864689 | gene-MA16_Dca012781 |
| novel_miR_484 | -4.204864689 | gene-MA16_Dca004540 |

|               |              |                     |
|---------------|--------------|---------------------|
| novel_miR_484 | -4.204864689 | gene-MA16_Dca018330 |
| novel_miR_484 | -4.204864689 | gene-MA16_Dca001333 |
| novel_miR_484 | -4.204864689 | gene-MA16_Dca014007 |
| novel_miR_484 | -4.204864689 | gene-MA16_Dca028410 |
| novel_miR_484 | -4.204864689 | gene-MA16_Dca028352 |
| novel_miR_484 | -4.204864689 | gene-MA16_Dca010058 |
| novel_miR_484 | -4.204864689 | gene-MA16_Dca000100 |
| novel_miR_484 | -4.204864689 | gene-MA16_Dca021773 |
| novel_miR_484 | -4.204864689 | gene-MA16_Dca001992 |
| novel_miR_484 | -4.204864689 | gene-MA16_Dca008877 |
| novel_miR_484 | -4.204864689 | gene-MA16_Dca028562 |
| novel_miR_484 | -4.204864689 | gene-MA16_Dca021141 |
| novel_miR_484 | -4.204864689 | gene-MA16_Dca024139 |
| novel_miR_484 | -4.204864689 | gene-MA16_Dca005319 |
| novel_miR_484 | -4.204864689 | gene-MA16_Dca011443 |
| novel_miR_484 | -4.204864689 | gene-MA16_Dca022957 |
| novel_miR_484 | -4.204864689 | gene-MA16_Dca014398 |
| novel_miR_484 | -4.204864689 | gene-MA16_Dca003585 |
| novel_miR_484 | -4.204864689 | gene-MA16_Dca008889 |
| novel_miR_484 | -4.204864689 | gene-MA16_Dca026047 |
| novel_miR_484 | -4.204864689 | gene-MA16_Dca019039 |
| novel_miR_484 | -4.204864689 | gene-MA16_Dca012296 |
| novel_miR_484 | -4.204864689 | gene-MA16_Dca011298 |
| novel_miR_484 | -4.204864689 | gene-MA16_Dca023407 |
| novel_miR_484 | -4.204864689 | gene-MA16_Dca017598 |
| novel_miR_484 | -4.204864689 | gene-MA16_Dca023855 |
| novel_miR_484 | -4.204864689 | gene-MA16_Dca004340 |
| novel_miR_484 | -4.204864689 | gene-MA16_Dca007240 |
| novel_miR_484 | -4.204864689 | gene-MA16_Dca005346 |
| novel_miR_484 | -4.204864689 | gene-MA16_Dca009990 |
| novel_miR_484 | -4.204864689 | gene-MA16_Dca014237 |
| novel_miR_484 | -4.204864689 | gene-MA16_Dca024325 |
| novel_miR_484 | -4.204864689 | gene-MA16_Dca022905 |
| novel_miR_484 | -4.204864689 | gene-MA16_Dca019790 |
| novel_miR_484 | -4.204864689 | gene-MA16_Dca010093 |
| novel_miR_484 | -4.204864689 | gene-MA16_Dca015921 |
| novel_miR_484 | -4.204864689 | gene-MA16_Dca017338 |
| novel_miR_484 | -4.204864689 | gene-MA16_Dca027164 |
| novel_miR_484 | -4.204864689 | gene-MA16_Dca022795 |
| novel_miR_484 | -4.204864689 | gene-MA16_Dca012251 |
| novel_miR_53  | -3.191236942 | gene-MA16_Dca005089 |
| novel_miR_53  | -3.191236942 | gene-MA16_Dca020713 |
| novel_miR_53  | -3.191236942 | gene-MA16_Dca022778 |
| novel_miR_53  | -3.191236942 | gene-MA16_Dca001003 |
| novel_miR_53  | -3.191236942 | gene-MA16_Dca007171 |
| novel_miR_53  | -3.191236942 | gene-MA16_Dca014115 |

|               |              |                     |
|---------------|--------------|---------------------|
| novel_miR_53  | -3.191236942 | gene-MA16_Dca000122 |
| novel_miR_53  | -3.191236942 | gene-MA16_Dca012806 |
| novel_miR_53  | -3.191236942 | gene-MA16_Dca003261 |
| novel_miR_53  | -3.191236942 | gene-MA16_Dca000505 |
| novel_miR_53  | -3.191236942 | gene-MA16_Dca009084 |
| novel_miR_53  | -3.191236942 | gene-MA16_Dca012781 |
| novel_miR_53  | -3.191236942 | gene-MA16_Dca010665 |
| novel_miR_53  | -3.191236942 | gene-MA16_Dca018178 |
| novel_miR_53  | -3.191236942 | gene-MA16_Dca011106 |
| novel_miR_53  | -3.191236942 | gene-MA16_Dca023559 |
| novel_miR_53  | -3.191236942 | gene-MA16_Dca017541 |
| novel_miR_53  | -3.191236942 | gene-MA16_Dca002207 |
| novel_miR_53  | -3.191236942 | gene-MA16_Dca017663 |
| novel_miR_53  | -3.191236942 | gene-MA16_Dca017043 |
| novel_miR_53  | -3.191236942 | gene-MA16_Dca010639 |
| novel_miR_53  | -3.191236942 | gene-MA16_Dca000121 |
| novel_miR_53  | -3.191236942 | gene-MA16_Dca023432 |
| novel_miR_53  | -3.191236942 | gene-MA16_Dca015909 |
| novel_miR_53  | -3.191236942 | gene-MA16_Dca002218 |
| novel_miR_53  | -3.191236942 | gene-MA16_Dca011246 |
| novel_miR_53  | -3.191236942 | gene-MA16_Dca003197 |
| novel_miR_53  | -3.191236942 | gene-MA16_Dca012420 |
| novel_miR_53  | -3.191236942 | gene-MA16_Dca001258 |
| novel_miR_53  | -3.191236942 | gene-MA16_Dca006414 |
| novel_miR_53  | -3.191236942 | gene-MA16_Dca021885 |
| novel_miR_53  | -3.191236942 | gene-MA16_Dca023972 |
| novel_miR_53  | -3.191236942 | gene-MA16_Dca014156 |
| novel_miR_53  | -3.191236942 | gene-MA16_Dca007605 |
| novel_miR_53  | -3.191236942 | gene-MA16_Dca022196 |
| novel_miR_53  | -3.191236942 | gene-MA16_Dca015291 |
| novel_miR_262 | -4.159399363 | gene-MA16_Dca011294 |
| novel_miR_262 | -4.159399363 | gene-MA16_Dca002242 |
| novel_miR_262 | -4.159399363 | gene-MA16_Dca001955 |
| novel_miR_262 | -4.159399363 | gene-MA16_Dca010163 |
| novel_miR_262 | -4.159399363 | gene-MA16_Dca010619 |
| novel_miR_262 | -4.159399363 | gene-MA16_Dca020583 |
| novel_miR_262 | -4.159399363 | gene-MA16_Dca012128 |
| novel_miR_262 | -4.159399363 | gene-MA16_Dca026927 |
| novel_miR_262 | -4.159399363 | gene-MA16_Dca006631 |
| novel_miR_262 | -4.159399363 | gene-MA16_Dca004093 |
| novel_miR_262 | -4.159399363 | gene-MA16_Dca002377 |
| novel_miR_262 | -4.159399363 | gene-MA16_Dca001199 |
| novel_miR_262 | -4.159399363 | gene-MA16_Dca006179 |
| novel_miR_262 | -4.159399363 | gene-MA16_Dca024442 |
| novel_miR_262 | -4.159399363 | gene-MA16_Dca001936 |
| novel_miR_262 | -4.159399363 | gene-MA16_Dca001785 |

|               |              |                     |
|---------------|--------------|---------------------|
| novel_miR_262 | -4.159399363 | gene-MA16_Dca001920 |
| novel_miR_262 | -4.159399363 | gene-MA16_Dca024581 |
| novel_miR_262 | -4.159399363 | gene-MA16_Dca018172 |
| novel_miR_262 | -4.159399363 | gene-MA16_Dca012093 |
| novel_miR_262 | -4.159399363 | gene-MA16_Dca000754 |
| novel_miR_262 | -4.159399363 | gene-MA16_Dca018548 |
| novel_miR_262 | -4.159399363 | gene-MA16_Dca013497 |
| novel_miR_262 | -4.159399363 | gene-MA16_Dca023379 |
| novel_miR_262 | -4.159399363 | gene-MA16_Dca019943 |
| novel_miR_262 | -4.159399363 | gene-MA16_Dca006898 |
| novel_miR_262 | -4.159399363 | gene-MA16_Dca019207 |
| novel_miR_262 | -4.159399363 | gene-MA16_Dca019153 |
| novel_miR_262 | -4.159399363 | gene-MA16_Dca010222 |
| novel_miR_262 | -4.159399363 | gene-MA16_Dca021850 |
| novel_miR_262 | -4.159399363 | gene-MA16_Dca000152 |
| novel_miR_262 | -4.159399363 | gene-MA16_Dca022211 |
| novel_miR_262 | -4.159399363 | gene-MA16_Dca010315 |
| novel_miR_262 | -4.159399363 | gene-MA16_Dca023840 |
| novel_miR_262 | -4.159399363 | gene-MA16_Dca006059 |
| novel_miR_262 | -4.159399363 | gene-MA16_Dca018725 |
| novel_miR_262 | -4.159399363 | gene-MA16_Dca023691 |
| novel_miR_262 | -4.159399363 | gene-MA16_Dca005799 |
| novel_miR_262 | -4.159399363 | gene-MA16_Dca021863 |
| novel_miR_262 | -4.159399363 | gene-MA16_Dca022508 |
| novel_miR_262 | -4.159399363 | gene-MA16_Dca012576 |
| novel_miR_262 | -4.159399363 | gene-MA16_Dca003694 |
| novel_miR_262 | -4.159399363 | gene-MA16_Dca004139 |
| novel_miR_262 | -4.159399363 | gene-MA16_Dca014631 |
| novel_miR_262 | -4.159399363 | gene-MA16_Dca021860 |
| novel_miR_262 | -4.159399363 | gene-MA16_Dca018722 |
| novel_miR_262 | -4.159399363 | gene-MA16_Dca008028 |
| novel_miR_262 | -4.159399363 | gene-MA16_Dca004158 |
| novel_miR_262 | -4.159399363 | gene-MA16_Dca023002 |
| novel_miR_262 | -4.159399363 | gene-MA16_Dca004133 |
| novel_miR_262 | -4.159399363 | gene-MA16_Dca025782 |
| novel_miR_262 | -4.159399363 | gene-MA16_Dca024909 |
| novel_miR_262 | -4.159399363 | gene-MA16_Dca022287 |
| novel_miR_262 | -4.159399363 | gene-MA16_Dca016598 |
| novel_miR_262 | -4.159399363 | gene-MA16_Dca014260 |
| novel_miR_262 | -4.159399363 | gene-MA16_Dca001930 |
| novel_miR_262 | -4.159399363 | gene-MA16_Dca014266 |
| novel_miR_262 | -4.159399363 | gene-MA16_Dca017977 |
| novel_miR_262 | -4.159399363 | gene-MA16_Dca007307 |
| novel_miR_262 | -4.159399363 | gene-MA16_Dca005596 |
| novel_miR_262 | -4.159399363 | gene-MA16_Dca016354 |
| novel_miR_262 | -4.159399363 | gene-MA16_Dca013418 |

|               |              |                     |
|---------------|--------------|---------------------|
| novel_miR_262 | -4.159399363 | gene-MA16_Dca005154 |
| novel_miR_262 | -4.159399363 | gene-MA16_Dca011751 |
| novel_miR_262 | -4.159399363 | gene-MA16_Dca015263 |
| novel_miR_262 | -4.159399363 | gene-MA16_Dca011523 |
| novel_miR_262 | -4.159399363 | gene-MA16_Dca011783 |
| novel_miR_262 | -4.159399363 | gene-MA16_Dca005151 |
| novel_miR_262 | -4.159399363 | gene-MA16_Dca011967 |
| novel_miR_262 | -4.159399363 | gene-MA16_Dca008222 |
| novel_miR_262 | -4.159399363 | gene-MA16_Dca007694 |
| novel_miR_262 | -4.159399363 | gene-MA16_Dca000885 |
| novel_miR_262 | -4.159399363 | gene-MA16_Dca006666 |
| novel_miR_262 | -4.159399363 | gene-MA16_Dca020166 |
| novel_miR_262 | -4.159399363 | gene-MA16_Dca018345 |
| novel_miR_262 | -4.159399363 | gene-MA16_Dca002241 |
| novel_miR_262 | -4.159399363 | gene-MA16_Dca019707 |
| novel_miR_262 | -4.159399363 | gene-MA16_Dca012938 |
| novel_miR_262 | -4.159399363 | gene-MA16_Dca020801 |
| novel_miR_262 | -4.159399363 | gene-MA16_Dca007955 |
| novel_miR_262 | -4.159399363 | gene-MA16_Dca022302 |
| novel_miR_262 | -4.159399363 | gene-MA16_Dca005617 |
| novel_miR_262 | -4.159399363 | gene-MA16_Dca000619 |
| novel_miR_262 | -4.159399363 | gene-MA16_Dca002697 |
| novel_miR_262 | -4.159399363 | gene-MA16_Dca024737 |
| novel_miR_262 | -4.159399363 | gene-MA16_Dca019222 |
| novel_miR_262 | -4.159399363 | gene-MA16_Dca014751 |
| novel_miR_262 | -4.159399363 | gene-MA16_Dca023601 |
| novel_miR_262 | -4.159399363 | gene-MA16_Dca004403 |
| novel_miR_262 | -4.159399363 | gene-MA16_Dca024281 |
| novel_miR_262 | -4.159399363 | gene-MA16_Dca015409 |
| novel_miR_262 | -4.159399363 | gene-MA16_Dca025223 |
| novel_miR_262 | -4.159399363 | gene-MA16_Dca009226 |
| novel_miR_262 | -4.159399363 | gene-MA16_Dca013322 |
| novel_miR_262 | -4.159399363 | gene-MA16_Dca016956 |
| novel_miR_262 | -4.159399363 | gene-MA16_Dca011603 |
| novel_miR_262 | -4.159399363 | gene-MA16_Dca007949 |
| novel_miR_262 | -4.159399363 | gene-MA16_Dca020207 |
| novel_miR_262 | -4.159399363 | gene-MA16_Dca021446 |
| novel_miR_262 | -4.159399363 | gene-MA16_Dca024988 |
| novel_miR_262 | -4.159399363 | gene-MA16_Dca003177 |
| novel_miR_262 | -4.159399363 | gene-MA16_Dca027492 |
| novel_miR_262 | -4.159399363 | gene-MA16_Dca011959 |
| novel_miR_262 | -4.159399363 | gene-MA16_Dca011627 |
| novel_miR_262 | -4.159399363 | gene-MA16_Dca020910 |
| novel_miR_262 | -4.159399363 | gene-MA16_Dca004692 |
| novel_miR_262 | -4.159399363 | gene-MA16_Dca010708 |
| novel_miR_262 | -4.159399363 | gene-MA16_Dca012099 |

|               |              |                     |
|---------------|--------------|---------------------|
| novel_miR_262 | -4.159399363 | gene-MA16_Dca011382 |
| novel_miR_262 | -4.159399363 | gene-MA16_Dca025262 |
| novel_miR_262 | -4.159399363 | gene-MA16_Dca028471 |
| novel_miR_262 | -4.159399363 | gene-MA16_Dca003911 |
| novel_miR_390 | -4.159397226 | gene-MA16_Dca014079 |
| novel_miR_390 | -4.159397226 | gene-MA16_Dca010045 |
| novel_miR_390 | -4.159397226 | gene-MA16_Dca016601 |
| novel_miR_390 | -4.159397226 | gene-MA16_Dca028500 |
| novel_miR_390 | -4.159397226 | gene-MA16_Dca008125 |
| novel_miR_390 | -4.159397226 | gene-MA16_Dca010799 |
| novel_miR_390 | -4.159397226 | gene-MA16_Dca028410 |
| novel_miR_390 | -4.159397226 | gene-MA16_Dca018794 |
| novel_miR_390 | -4.159397226 | gene-MA16_Dca005769 |
| novel_miR_390 | -4.159397226 | gene-MA16_Dca003585 |
| novel_miR_390 | -4.159397226 | gene-MA16_Dca021544 |
| novel_miR_390 | -4.159397226 | gene-MA16_Dca013966 |
| novel_miR_390 | -4.159397226 | gene-MA16_Dca014033 |
| novel_miR_390 | -4.159397226 | gene-MA16_Dca027734 |
| novel_miR_390 | -4.159397226 | gene-MA16_Dca014296 |
| novel_miR_390 | -4.159397226 | gene-MA16_Dca024277 |
| novel_miR_390 | -4.159397226 | gene-MA16_Dca011847 |
| novel_miR_390 | -4.159397226 | gene-MA16_Dca013703 |
| novel_miR_390 | -4.159397226 | gene-MA16_Dca014007 |
| novel_miR_390 | -4.159397226 | gene-MA16_Dca014915 |
| novel_miR_390 | -4.159397226 | gene-MA16_Dca004540 |
| novel_miR_390 | -4.159397226 | gene-MA16_Dca011199 |
| novel_miR_390 | -4.159397226 | gene-MA16_Dca022649 |
| novel_miR_390 | -4.159397226 | gene-MA16_Dca018160 |
| novel_miR_390 | -4.159397226 | gene-MA16_Dca002338 |
| novel_miR_390 | -4.159397226 | gene-MA16_Dca015057 |
| novel_miR_390 | -4.159397226 | gene-MA16_Dca016490 |
| novel_miR_390 | -4.159397226 | gene-MA16_Dca025504 |
| novel_miR_390 | -4.159397226 | gene-MA16_Dca016699 |
| novel_miR_390 | -4.159397226 | gene-MA16_Dca014673 |
| novel_miR_390 | -4.159397226 | gene-MA16_Dca022905 |
| novel_miR_390 | -4.159397226 | gene-MA16_Dca015359 |
| novel_miR_390 | -4.159397226 | gene-MA16_Dca011253 |
| novel_miR_390 | -4.159397226 | gene-MA16_Dca014237 |
| novel_miR_390 | -4.159397226 | gene-MA16_Dca021241 |
| novel_miR_390 | -4.159397226 | gene-MA16_Dca000483 |
| novel_miR_390 | -4.159397226 | gene-MA16_Dca009990 |
| novel_miR_390 | -4.159397226 | gene-MA16_Dca005346 |
| novel_miR_390 | -4.159397226 | gene-MA16_Dca022795 |
| novel_miR_390 | -4.159397226 | gene-MA16_Dca008661 |
| novel_miR_390 | -4.159397226 | gene-MA16_Dca017160 |
| novel_miR_390 | -4.159397226 | gene-MA16_Dca022638 |

|               |              |                     |
|---------------|--------------|---------------------|
| novel_miR_390 | -4.159397226 | gene-MA16_Dca013961 |
| novel_miR_390 | -4.159397226 | gene-MA16_Dca010093 |
| novel_miR_390 | -4.159397226 | gene-MA16_Dca002089 |
| novel_miR_390 | -4.159397226 | gene-MA16_Dca021165 |
| novel_miR_390 | -4.159397226 | gene-MA16_Dca004503 |
| novel_miR_390 | -4.159397226 | gene-MA16_Dca007957 |
| novel_miR_390 | -4.159397226 | gene-MA16_Dca020534 |
| novel_miR_390 | -4.159397226 | gene-MA16_Dca004340 |
| novel_miR_390 | -4.159397226 | gene-MA16_Dca017598 |
| novel_miR_390 | -4.159397226 | gene-MA16_Dca012435 |
| novel_miR_390 | -4.159397226 | gene-MA16_Dca007417 |
| novel_miR_390 | -4.159397226 | gene-MA16_Dca010932 |
| novel_miR_390 | -4.159397226 | gene-MA16_Dca023407 |
| novel_miR_390 | -4.159397226 | gene-MA16_Dca002781 |
| novel_miR_390 | -4.159397226 | gene-MA16_Dca008350 |
| novel_miR_390 | -4.159397226 | gene-MA16_Dca002133 |
| novel_miR_390 | -4.159397226 | gene-MA16_Dca015811 |
| novel_miR_390 | -4.159397226 | gene-MA16_Dca023276 |
| miR399b_1     | -2.103094579 | gene-MA16_Dca015394 |
| miR399b_1     | -2.103094579 | gene-MA16_Dca002693 |
| miR399b_1     | -2.103094579 | gene-MA16_Dca009131 |
| miR399b_1     | -2.103094579 | gene-MA16_Dca010687 |
| miR399b_1     | -2.103094579 | gene-MA16_Dca028429 |
| miR399b_1     | -2.103094579 | gene-MA16_Dca015044 |
| miR399b_1     | -2.103094579 | gene-MA16_Dca008850 |
| miR399b_1     | -2.103094579 | gene-MA16_Dca013506 |
| miR399b_1     | -2.103094579 | gene-MA16_Dca001351 |
| miR399b_1     | -2.103094579 | gene-MA16_Dca001177 |
| miR399b_1     | -2.103094579 | gene-MA16_Dca011813 |
| miR399b_1     | -2.103094579 | gene-MA16_Dca010182 |
| miR399b_1     | -2.103094579 | gene-MA16_Dca010688 |
| miR399b_1     | -2.103094579 | gene-MA16_Dca026575 |
| miR395b       | -2.674362584 | gene-MA16_Dca015429 |
| miR395b       | -2.674362584 | gene-MA16_Dca003297 |
| miR395b       | -2.674362584 | gene-MA16_Dca007732 |
| miR395b       | -2.674362584 | gene-MA16_Dca011968 |
| miR395b       | -2.674362584 | gene-MA16_Dca003285 |
| miR395b       | -2.674362584 | gene-MA16_Dca007731 |
| miR395b       | -2.674362584 | gene-MA16_Dca004386 |
| miR395b       | -2.674362584 | gene-MA16_Dca009355 |
| miR395b       | -2.674362584 | gene-MA16_Dca019636 |
| miR395b       | -2.674362584 | gene-MA16_Dca001411 |
| miR395b       | -2.674362584 | gene-MA16_Dca025511 |
| miR395m       | -2.035107482 | gene-MA16_Dca017889 |
| miR395m       | -2.035107482 | gene-MA16_Dca007732 |
| miR395m       | -2.035107482 | gene-MA16_Dca021033 |

|               |              |                     |
|---------------|--------------|---------------------|
| miR395m       | -2.035107482 | gene-MA16_Dca007646 |
| miR395m       | -2.035107482 | gene-MA16_Dca026271 |
| miR395m       | -2.035107482 | gene-MA16_Dca003297 |
| miR395m       | -2.035107482 | gene-MA16_Dca025511 |
| miR395m       | -2.035107482 | gene-MA16_Dca001411 |
| miR395m       | -2.035107482 | gene-MA16_Dca007731 |
| miR395m       | -2.035107482 | gene-MA16_Dca004386 |
| miR395m       | -2.035107482 | gene-MA16_Dca009355 |
| miR395m       | -2.035107482 | gene-MA16_Dca003285 |
| miR395m       | -2.035107482 | gene-MA16_Dca005635 |
| miR395m       | -2.035107482 | gene-MA16_Dca011968 |
| miR528_5p     | -2.674602419 | gene-MA16_Dca020077 |
| miR528_5p     | -2.674602419 | gene-MA16_Dca010331 |
| miR528_5p     | -2.674602419 | gene-MA16_Dca002770 |
| miR528_5p     | -2.674602419 | gene-MA16_Dca004667 |
| miR528_5p     | -2.674602419 | gene-MA16_Dca000891 |
| miR528_5p     | -2.674602419 | gene-MA16_Dca027730 |
| miR528_5p     | -2.674602419 | gene-MA16_Dca012338 |
| miR528_5p     | -2.674602419 | gene-MA16_Dca015008 |
| miR528_5p     | -2.674602419 | gene-MA16_Dca021334 |
| miR528_5p     | -2.674602419 | gene-MA16_Dca013643 |
| miR528_5p     | -2.674602419 | gene-MA16_Dca022587 |
| miR528_5p     | -2.674602419 | gene-MA16_Dca014181 |
| miR528_5p     | -2.674602419 | gene-MA16_Dca015948 |
| miR528_5p     | -2.674602419 | gene-MA16_Dca013418 |
| miR528_5p     | -2.674602419 | gene-MA16_Dca028734 |
| miR528_5p     | -2.674602419 | gene-MA16_Dca020299 |
| miR528_5p     | -2.674602419 | gene-MA16_Dca009198 |
| miR528_5p     | -2.674602419 | gene-MA16_Dca021947 |
| miR528_5p     | -2.674602419 | gene-MA16_Dca026005 |
| miR528_5p     | -2.674602419 | gene-MA16_Dca011035 |
| miR528_5p     | -2.674602419 | gene-MA16_Dca010931 |
| miR528_5p     | -2.674602419 | gene-MA16_Dca019975 |
| miR528_5p     | -2.674602419 | gene-MA16_Dca001951 |
| miR528_5p     | -2.674602419 | gene-MA16_Dca000698 |
| miR528_5p     | -2.674602419 | gene-MA16_Dca011273 |
| miR528_5p     | -2.674602419 | gene-MA16_Dca002672 |
| miR528_5p     | -2.674602419 | gene-MA16_Dca026199 |
| miR528_5p     | -2.674602419 | gene-MA16_Dca020850 |
| miR528_5p     | -2.674602419 | gene-MA16_Dca003559 |
| miR528_5p     | -2.674602419 | gene-MA16_Dca026841 |
| miR528_5p     | -2.674602419 | gene-MA16_Dca026559 |
| miR399e_5p_2  | 1.249181458  | gene-MA16_Dca007637 |
| miR7532a      | 1.168860011  | gene-MA16_Dca009494 |
| novel_miR_264 | 0.897247319  | gene-MA16_Dca017476 |
| novel_miR_264 | 0.897247319  | gene-MA16_Dca018659 |

|               |             |                     |
|---------------|-------------|---------------------|
| novel_miR_264 | 0.897247319 | gene-MA16_Dca019290 |
| novel_miR_264 | 0.897247319 | gene-MA16_Dca015518 |
| novel_miR_204 | 1.10059286  | gene-MA16_Dca028017 |
| novel_miR_204 | 1.10059286  | gene-MA16_Dca010066 |
| novel_miR_204 | 1.10059286  | gene-MA16_Dca028670 |
| novel_miR_204 | 1.10059286  | gene-MA16_Dca025840 |
| novel_miR_204 | 1.10059286  | gene-MA16_Dca028781 |
| novel_miR_204 | 1.10059286  | gene-MA16_Dca009114 |
| novel_miR_204 | 1.10059286  | gene-MA16_Dca002142 |
| novel_miR_204 | 1.10059286  | gene-MA16_Dca010312 |
| novel_miR_204 | 1.10059286  | gene-MA16_Dca022915 |
| novel_miR_204 | 1.10059286  | gene-MA16_Dca025628 |
| novel_miR_204 | 1.10059286  | gene-MA16_Dca006665 |
| novel_miR_204 | 1.10059286  | gene-MA16_Dca002985 |
| novel_miR_204 | 1.10059286  | gene-MA16_Dca004156 |
| novel_miR_204 | 1.10059286  | gene-MA16_Dca015210 |
| novel_miR_204 | 1.10059286  | gene-MA16_Dca022493 |
| novel_miR_204 | 1.10059286  | gene-MA16_Dca020190 |
| novel_miR_204 | 1.10059286  | gene-MA16_Dca024943 |
| novel_miR_204 | 1.10059286  | gene-MA16_Dca027918 |
| novel_miR_204 | 1.10059286  | gene-MA16_Dca028785 |
| novel_miR_204 | 1.10059286  | gene-MA16_Dca028825 |
| novel_miR_204 | 1.10059286  | gene-MA16_Dca017679 |
| novel_miR_204 | 1.10059286  | gene-MA16_Dca009386 |
| novel_miR_204 | 1.10059286  | gene-MA16_Dca015874 |
| novel_miR_204 | 1.10059286  | gene-MA16_Dca021724 |
| novel_miR_204 | 1.10059286  | gene-MA16_Dca028230 |
| novel_miR_204 | 1.10059286  | gene-MA16_Dca017511 |
| novel_miR_204 | 1.10059286  | gene-MA16_Dca004131 |
| novel_miR_204 | 1.10059286  | gene-MA16_Dca010485 |
| novel_miR_204 | 1.10059286  | gene-MA16_Dca018453 |
| novel_miR_204 | 1.10059286  | gene-MA16_Dca019753 |
| novel_miR_204 | 1.10059286  | gene-MA16_Dca017455 |
| novel_miR_204 | 1.10059286  | gene-MA16_Dca000613 |
| novel_miR_204 | 1.10059286  | gene-MA16_Dca022492 |
| novel_miR_204 | 1.10059286  | gene-MA16_Dca004721 |
| novel_miR_204 | 1.10059286  | gene-MA16_Dca028949 |
| novel_miR_204 | 1.10059286  | gene-MA16_Dca003873 |
| novel_miR_204 | 1.10059286  | gene-MA16_Dca000766 |
| novel_miR_204 | 1.10059286  | gene-MA16_Dca003896 |
| novel_miR_204 | 1.10059286  | gene-MA16_Dca021252 |
| novel_miR_420 | 1.066066015 | gene-MA16_Dca024943 |
| novel_miR_420 | 1.066066015 | gene-MA16_Dca027918 |
| novel_miR_420 | 1.066066015 | gene-MA16_Dca028785 |
| novel_miR_420 | 1.066066015 | gene-MA16_Dca017679 |
| novel_miR_420 | 1.066066015 | gene-MA16_Dca028825 |

|               |             |                     |
|---------------|-------------|---------------------|
| novel_miR_420 | 1.066066015 | gene-MA16_Dca004156 |
| novel_miR_420 | 1.066066015 | gene-MA16_Dca015210 |
| novel_miR_420 | 1.066066015 | gene-MA16_Dca022493 |
| novel_miR_420 | 1.066066015 | gene-MA16_Dca020190 |
| novel_miR_420 | 1.066066015 | gene-MA16_Dca002142 |
| novel_miR_420 | 1.066066015 | gene-MA16_Dca010312 |
| novel_miR_420 | 1.066066015 | gene-MA16_Dca022915 |
| novel_miR_420 | 1.066066015 | gene-MA16_Dca025628 |
| novel_miR_420 | 1.066066015 | gene-MA16_Dca002985 |
| novel_miR_420 | 1.066066015 | gene-MA16_Dca006665 |
| novel_miR_420 | 1.066066015 | gene-MA16_Dca010066 |
| novel_miR_420 | 1.066066015 | gene-MA16_Dca028017 |
| novel_miR_420 | 1.066066015 | gene-MA16_Dca028670 |
| novel_miR_420 | 1.066066015 | gene-MA16_Dca025840 |
| novel_miR_420 | 1.066066015 | gene-MA16_Dca028781 |
| novel_miR_420 | 1.066066015 | gene-MA16_Dca009114 |
| novel_miR_420 | 1.066066015 | gene-MA16_Dca000766 |
| novel_miR_420 | 1.066066015 | gene-MA16_Dca003873 |
| novel_miR_420 | 1.066066015 | gene-MA16_Dca003896 |
| novel_miR_420 | 1.066066015 | gene-MA16_Dca021252 |
| novel_miR_420 | 1.066066015 | gene-MA16_Dca000613 |
| novel_miR_420 | 1.066066015 | gene-MA16_Dca017455 |
| novel_miR_420 | 1.066066015 | gene-MA16_Dca022492 |
| novel_miR_420 | 1.066066015 | gene-MA16_Dca004721 |
| novel_miR_420 | 1.066066015 | gene-MA16_Dca028949 |
| novel_miR_420 | 1.066066015 | gene-MA16_Dca004131 |
| novel_miR_420 | 1.066066015 | gene-MA16_Dca010485 |
| novel_miR_420 | 1.066066015 | gene-MA16_Dca018453 |
| novel_miR_420 | 1.066066015 | gene-MA16_Dca019753 |
| novel_miR_420 | 1.066066015 | gene-MA16_Dca009386 |
| novel_miR_420 | 1.066066015 | gene-MA16_Dca015874 |
| novel_miR_420 | 1.066066015 | gene-MA16_Dca021724 |
| novel_miR_420 | 1.066066015 | gene-MA16_Dca028230 |
| novel_miR_420 | 1.066066015 | gene-MA16_Dca017511 |
| novel_miR_417 | 1.058538515 | gene-MA16_Dca028949 |
| novel_miR_417 | 1.058538515 | gene-MA16_Dca004721 |
| novel_miR_417 | 1.058538515 | gene-MA16_Dca017455 |
| novel_miR_417 | 1.058538515 | gene-MA16_Dca000613 |
| novel_miR_417 | 1.058538515 | gene-MA16_Dca022492 |
| novel_miR_417 | 1.058538515 | gene-MA16_Dca000766 |
| novel_miR_417 | 1.058538515 | gene-MA16_Dca003873 |
| novel_miR_417 | 1.058538515 | gene-MA16_Dca021252 |
| novel_miR_417 | 1.058538515 | gene-MA16_Dca003896 |
| novel_miR_417 | 1.058538515 | gene-MA16_Dca021724 |
| novel_miR_417 | 1.058538515 | gene-MA16_Dca017511 |
| novel_miR_417 | 1.058538515 | gene-MA16_Dca028230 |

|               |              |                     |
|---------------|--------------|---------------------|
| novel_miR_417 | 1.058538515  | gene-MA16_Dca009386 |
| novel_miR_417 | 1.058538515  | gene-MA16_Dca015874 |
| novel_miR_417 | 1.058538515  | gene-MA16_Dca010485 |
| novel_miR_417 | 1.058538515  | gene-MA16_Dca018453 |
| novel_miR_417 | 1.058538515  | gene-MA16_Dca019753 |
| novel_miR_417 | 1.058538515  | gene-MA16_Dca004131 |
| novel_miR_417 | 1.058538515  | gene-MA16_Dca022493 |
| novel_miR_417 | 1.058538515  | gene-MA16_Dca015210 |
| novel_miR_417 | 1.058538515  | gene-MA16_Dca020190 |
| novel_miR_417 | 1.058538515  | gene-MA16_Dca004156 |
| novel_miR_417 | 1.058538515  | gene-MA16_Dca028785 |
| novel_miR_417 | 1.058538515  | gene-MA16_Dca017679 |
| novel_miR_417 | 1.058538515  | gene-MA16_Dca028825 |
| novel_miR_417 | 1.058538515  | gene-MA16_Dca024943 |
| novel_miR_417 | 1.058538515  | gene-MA16_Dca027918 |
| novel_miR_417 | 1.058538515  | gene-MA16_Dca009114 |
| novel_miR_417 | 1.058538515  | gene-MA16_Dca028781 |
| novel_miR_417 | 1.058538515  | gene-MA16_Dca028670 |
| novel_miR_417 | 1.058538515  | gene-MA16_Dca010066 |
| novel_miR_417 | 1.058538515  | gene-MA16_Dca028017 |
| novel_miR_417 | 1.058538515  | gene-MA16_Dca025840 |
| novel_miR_417 | 1.058538515  | gene-MA16_Dca025628 |
| novel_miR_417 | 1.058538515  | gene-MA16_Dca006665 |
| novel_miR_417 | 1.058538515  | gene-MA16_Dca002985 |
| novel_miR_417 | 1.058538515  | gene-MA16_Dca002142 |
| novel_miR_417 | 1.058538515  | gene-MA16_Dca022915 |
| novel_miR_417 | 1.058538515  | gene-MA16_Dca010312 |
| novel_miR_192 | 0.798895311  | gene-MA16_Dca010818 |
| novel_miR_192 | 0.798895311  | gene-MA16_Dca005939 |
| novel_miR_451 | -0.860759143 | gene-MA16_Dca004841 |
| novel_miR_451 | -0.860759143 | gene-MA16_Dca009490 |
| novel_miR_451 | -0.860759143 | gene-MA16_Dca003193 |
| novel_miR_1   | -0.658885913 | gene-MA16_Dca006730 |
| novel_miR_1   | -0.658885913 | gene-MA16_Dca011627 |
| novel_miR_1   | -0.658885913 | gene-MA16_Dca023929 |
| novel_miR_1   | -0.658885913 | gene-MA16_Dca024649 |
| novel_miR_1   | -0.658885913 | gene-MA16_Dca009490 |
| novel_miR_1   | -0.658885913 | gene-MA16_Dca000440 |
| novel_miR_1   | -0.658885913 | gene-MA16_Dca006916 |
| novel_miR_1   | -0.658885913 | gene-MA16_Dca024036 |
| novel_miR_1   | -0.658885913 | gene-MA16_Dca021780 |
| novel_miR_445 | -0.657446775 | gene-MA16_Dca021780 |
| novel_miR_445 | -0.657446775 | gene-MA16_Dca024036 |
| novel_miR_445 | -0.657446775 | gene-MA16_Dca006916 |
| novel_miR_445 | -0.657446775 | gene-MA16_Dca000440 |
| novel_miR_445 | -0.657446775 | gene-MA16_Dca009490 |

|               |              |                     |
|---------------|--------------|---------------------|
| novel_miR_445 | -0.657446775 | gene-MA16_Dca024649 |
| novel_miR_445 | -0.657446775 | gene-MA16_Dca023929 |
| novel_miR_445 | -0.657446775 | gene-MA16_Dca006730 |
| novel_miR_445 | -0.657446775 | gene-MA16_Dca011627 |
| miR530a       | 0.89183093   | gene-MA16_Dca022268 |
| miR530a       | 0.89183093   | gene-MA16_Dca019882 |
| miR530a       | 0.89183093   | gene-MA16_Dca013836 |
| miR530a       | 0.89183093   | gene-MA16_Dca011594 |
| miR530a       | 0.89183093   | gene-MA16_Dca010385 |
| novel_miR_191 | -0.658852397 | gene-MA16_Dca006916 |
| novel_miR_191 | -0.658852397 | gene-MA16_Dca021780 |
| novel_miR_191 | -0.658852397 | gene-MA16_Dca024036 |
| novel_miR_191 | -0.658852397 | gene-MA16_Dca011627 |
| novel_miR_191 | -0.658852397 | gene-MA16_Dca023929 |
| novel_miR_191 | -0.658852397 | gene-MA16_Dca006730 |
| novel_miR_191 | -0.658852397 | gene-MA16_Dca024649 |
| novel_miR_191 | -0.658852397 | gene-MA16_Dca000440 |
| novel_miR_191 | -0.658852397 | gene-MA16_Dca009490 |
| novel_miR_215 | -0.674212206 | gene-MA16_Dca023237 |
| novel_miR_215 | -0.674212206 | gene-MA16_Dca021366 |
| novel_miR_215 | -0.674212206 | gene-MA16_Dca009502 |
| novel_miR_215 | -0.674212206 | gene-MA16_Dca020878 |
| novel_miR_215 | -0.674212206 | gene-MA16_Dca011564 |
| novel_miR_215 | -0.674212206 | gene-MA16_Dca005261 |
| novel_miR_215 | -0.674212206 | gene-MA16_Dca006086 |
| novel_miR_215 | -0.674212206 | gene-MA16_Dca008215 |
| novel_miR_215 | -0.674212206 | gene-MA16_Dca003056 |
| miR396b_1     | 0.805439951  | gene-MA16_Dca005596 |
| miR396b_1     | 0.805439951  | gene-MA16_Dca016354 |
| miR396b_1     | 0.805439951  | gene-MA16_Dca013418 |
| miR396b_1     | 0.805439951  | gene-MA16_Dca007307 |
| miR396b_1     | 0.805439951  | gene-MA16_Dca017977 |
| miR396b_1     | 0.805439951  | gene-MA16_Dca014266 |
| miR396b_1     | 0.805439951  | gene-MA16_Dca016598 |
| miR396b_1     | 0.805439951  | gene-MA16_Dca001930 |
| miR396b_1     | 0.805439951  | gene-MA16_Dca014260 |
| miR396b_1     | 0.805439951  | gene-MA16_Dca022287 |
| miR396b_1     | 0.805439951  | gene-MA16_Dca024909 |
| miR396b_1     | 0.805439951  | gene-MA16_Dca004133 |
| miR396b_1     | 0.805439951  | gene-MA16_Dca025782 |
| miR396b_1     | 0.805439951  | gene-MA16_Dca004158 |
| miR396b_1     | 0.805439951  | gene-MA16_Dca023002 |
| miR396b_1     | 0.805439951  | gene-MA16_Dca008028 |
| miR396b_1     | 0.805439951  | gene-MA16_Dca014631 |
| miR396b_1     | 0.805439951  | gene-MA16_Dca004139 |
| miR396b_1     | 0.805439951  | gene-MA16_Dca018722 |

|           |             |                     |
|-----------|-------------|---------------------|
| miR396b_1 | 0.805439951 | gene-MA16_Dca021860 |
| miR396b_1 | 0.805439951 | gene-MA16_Dca012576 |
| miR396b_1 | 0.805439951 | gene-MA16_Dca003694 |
| miR396b_1 | 0.805439951 | gene-MA16_Dca021863 |
| miR396b_1 | 0.805439951 | gene-MA16_Dca005799 |
| miR396b_1 | 0.805439951 | gene-MA16_Dca022508 |
| miR396b_1 | 0.805439951 | gene-MA16_Dca018725 |
| miR396b_1 | 0.805439951 | gene-MA16_Dca023691 |
| miR396b_1 | 0.805439951 | gene-MA16_Dca023840 |
| miR396b_1 | 0.805439951 | gene-MA16_Dca010315 |
| miR396b_1 | 0.805439951 | gene-MA16_Dca006059 |
| miR396b_1 | 0.805439951 | gene-MA16_Dca022211 |
| miR396b_1 | 0.805439951 | gene-MA16_Dca000152 |
| miR396b_1 | 0.805439951 | gene-MA16_Dca021850 |
| miR396b_1 | 0.805439951 | gene-MA16_Dca006898 |
| miR396b_1 | 0.805439951 | gene-MA16_Dca019153 |
| miR396b_1 | 0.805439951 | gene-MA16_Dca019207 |
| miR396b_1 | 0.805439951 | gene-MA16_Dca010222 |
| miR396b_1 | 0.805439951 | gene-MA16_Dca023379 |
| miR396b_1 | 0.805439951 | gene-MA16_Dca019943 |
| miR396b_1 | 0.805439951 | gene-MA16_Dca000754 |
| miR396b_1 | 0.805439951 | gene-MA16_Dca013497 |
| miR396b_1 | 0.805439951 | gene-MA16_Dca018548 |
| miR396b_1 | 0.805439951 | gene-MA16_Dca018172 |
| miR396b_1 | 0.805439951 | gene-MA16_Dca001920 |
| miR396b_1 | 0.805439951 | gene-MA16_Dca012093 |
| miR396b_1 | 0.805439951 | gene-MA16_Dca024581 |
| miR396b_1 | 0.805439951 | gene-MA16_Dca001936 |
| miR396b_1 | 0.805439951 | gene-MA16_Dca024442 |
| miR396b_1 | 0.805439951 | gene-MA16_Dca001785 |
| miR396b_1 | 0.805439951 | gene-MA16_Dca006179 |
| miR396b_1 | 0.805439951 | gene-MA16_Dca001199 |
| miR396b_1 | 0.805439951 | gene-MA16_Dca004093 |
| miR396b_1 | 0.805439951 | gene-MA16_Dca002377 |
| miR396b_1 | 0.805439951 | gene-MA16_Dca026927 |
| miR396b_1 | 0.805439951 | gene-MA16_Dca006631 |
| miR396b_1 | 0.805439951 | gene-MA16_Dca012128 |
| miR396b_1 | 0.805439951 | gene-MA16_Dca002242 |
| miR396b_1 | 0.805439951 | gene-MA16_Dca011294 |
| miR396b_1 | 0.805439951 | gene-MA16_Dca001955 |
| miR396b_1 | 0.805439951 | gene-MA16_Dca010163 |
| miR396b_1 | 0.805439951 | gene-MA16_Dca010619 |
| miR396b_1 | 0.805439951 | gene-MA16_Dca020583 |
| miR396b_1 | 0.805439951 | gene-MA16_Dca003911 |
| miR396b_1 | 0.805439951 | gene-MA16_Dca028471 |
| miR396b_1 | 0.805439951 | gene-MA16_Dca025262 |

|           |             |                     |
|-----------|-------------|---------------------|
| miR396b_1 | 0.805439951 | gene-MA16_Dca011382 |
| miR396b_1 | 0.805439951 | gene-MA16_Dca012099 |
| miR396b_1 | 0.805439951 | gene-MA16_Dca020910 |
| miR396b_1 | 0.805439951 | gene-MA16_Dca010708 |
| miR396b_1 | 0.805439951 | gene-MA16_Dca004692 |
| miR396b_1 | 0.805439951 | gene-MA16_Dca003177 |
| miR396b_1 | 0.805439951 | gene-MA16_Dca024988 |
| miR396b_1 | 0.805439951 | gene-MA16_Dca027492 |
| miR396b_1 | 0.805439951 | gene-MA16_Dca011959 |
| miR396b_1 | 0.805439951 | gene-MA16_Dca011627 |
| miR396b_1 | 0.805439951 | gene-MA16_Dca021446 |
| miR396b_1 | 0.805439951 | gene-MA16_Dca020207 |
| miR396b_1 | 0.805439951 | gene-MA16_Dca007949 |
| miR396b_1 | 0.805439951 | gene-MA16_Dca016956 |
| miR396b_1 | 0.805439951 | gene-MA16_Dca011603 |
| miR396b_1 | 0.805439951 | gene-MA16_Dca013322 |
| miR396b_1 | 0.805439951 | gene-MA16_Dca025223 |
| miR396b_1 | 0.805439951 | gene-MA16_Dca009226 |
| miR396b_1 | 0.805439951 | gene-MA16_Dca024281 |
| miR396b_1 | 0.805439951 | gene-MA16_Dca015409 |
| miR396b_1 | 0.805439951 | gene-MA16_Dca023601 |
| miR396b_1 | 0.805439951 | gene-MA16_Dca004403 |
| miR396b_1 | 0.805439951 | gene-MA16_Dca019222 |
| miR396b_1 | 0.805439951 | gene-MA16_Dca024737 |
| miR396b_1 | 0.805439951 | gene-MA16_Dca014751 |
| miR396b_1 | 0.805439951 | gene-MA16_Dca022302 |
| miR396b_1 | 0.805439951 | gene-MA16_Dca005617 |
| miR396b_1 | 0.805439951 | gene-MA16_Dca000619 |
| miR396b_1 | 0.805439951 | gene-MA16_Dca002697 |
| miR396b_1 | 0.805439951 | gene-MA16_Dca007955 |
| miR396b_1 | 0.805439951 | gene-MA16_Dca020801 |
| miR396b_1 | 0.805439951 | gene-MA16_Dca012938 |
| miR396b_1 | 0.805439951 | gene-MA16_Dca002241 |
| miR396b_1 | 0.805439951 | gene-MA16_Dca019707 |
| miR396b_1 | 0.805439951 | gene-MA16_Dca020166 |
| miR396b_1 | 0.805439951 | gene-MA16_Dca018345 |
| miR396b_1 | 0.805439951 | gene-MA16_Dca008222 |
| miR396b_1 | 0.805439951 | gene-MA16_Dca006666 |
| miR396b_1 | 0.805439951 | gene-MA16_Dca007694 |
| miR396b_1 | 0.805439951 | gene-MA16_Dca000885 |
| miR396b_1 | 0.805439951 | gene-MA16_Dca011783 |
| miR396b_1 | 0.805439951 | gene-MA16_Dca005151 |
| miR396b_1 | 0.805439951 | gene-MA16_Dca011967 |
| miR396b_1 | 0.805439951 | gene-MA16_Dca011523 |
| miR396b_1 | 0.805439951 | gene-MA16_Dca011751 |
| miR396b_1 | 0.805439951 | gene-MA16_Dca015263 |

|                |              |                     |
|----------------|--------------|---------------------|
| miR396b_1      | 0.805439951  | gene-MA16_Dca005154 |
| novel_miR_87   | -0.657817551 | gene-MA16_Dca011627 |
| novel_miR_87   | -0.657817551 | gene-MA16_Dca006730 |
| novel_miR_87   | -0.657817551 | gene-MA16_Dca023929 |
| novel_miR_87   | -0.657817551 | gene-MA16_Dca024649 |
| novel_miR_87   | -0.657817551 | gene-MA16_Dca000440 |
| novel_miR_87   | -0.657817551 | gene-MA16_Dca009490 |
| novel_miR_87   | -0.657817551 | gene-MA16_Dca006916 |
| novel_miR_87   | -0.657817551 | gene-MA16_Dca024036 |
| novel_miR_87   | -0.657817551 | gene-MA16_Dca021780 |
| miR393b_3p     | 0.711314138  | gene-MA16_Dca024562 |
| novel_miR_97   | -0.69321229  | gene-MA16_Dca009490 |
| novel_miR_97   | -0.69321229  | gene-MA16_Dca004841 |
| novel_miR_97   | -0.69321229  | gene-MA16_Dca003193 |
| miR1520f_5p_11 | -0.694124597 | gene-MA16_Dca004841 |
| novel_miR_280  | -1.020762776 | gene-MA16_Dca023581 |
| novel_miR_280  | -1.020762776 | gene-MA16_Dca026290 |
| novel_miR_280  | -1.020762776 | gene-MA16_Dca006234 |
| novel_miR_280  | -1.020762776 | gene-MA16_Dca019870 |
| novel_miR_280  | -1.020762776 | gene-MA16_Dca022292 |
| novel_miR_280  | -1.020762776 | gene-MA16_Dca019243 |
| novel_miR_280  | -1.020762776 | gene-MA16_Dca021320 |
| novel_miR_280  | -1.020762776 | gene-MA16_Dca008936 |
| novel_miR_280  | -1.020762776 | gene-MA16_Dca023290 |
| novel_miR_280  | -1.020762776 | gene-MA16_Dca008635 |
| novel_miR_280  | -1.020762776 | gene-MA16_Dca000122 |
| novel_miR_280  | -1.020762776 | gene-MA16_Dca000505 |
| novel_miR_280  | -1.020762776 | gene-MA16_Dca014483 |
| novel_miR_280  | -1.020762776 | gene-MA16_Dca012806 |
| novel_miR_280  | -1.020762776 | gene-MA16_Dca006228 |
| novel_miR_280  | -1.020762776 | gene-MA16_Dca005089 |
| novel_miR_280  | -1.020762776 | gene-MA16_Dca022914 |
| novel_miR_280  | -1.020762776 | gene-MA16_Dca009985 |
| novel_miR_280  | -1.020762776 | gene-MA16_Dca009642 |
| novel_miR_280  | -1.020762776 | gene-MA16_Dca013592 |
| novel_miR_280  | -1.020762776 | gene-MA16_Dca019648 |
| novel_miR_280  | -1.020762776 | gene-MA16_Dca020263 |
| novel_miR_280  | -1.020762776 | gene-MA16_Dca005939 |
| novel_miR_280  | -1.020762776 | gene-MA16_Dca003381 |
| novel_miR_280  | -1.020762776 | gene-MA16_Dca004513 |
| novel_miR_280  | -1.020762776 | gene-MA16_Dca025963 |
| novel_miR_280  | -1.020762776 | gene-MA16_Dca012896 |
| novel_miR_280  | -1.020762776 | gene-MA16_Dca021885 |
| novel_miR_280  | -1.020762776 | gene-MA16_Dca007184 |
| novel_miR_280  | -1.020762776 | gene-MA16_Dca007682 |
| novel_miR_280  | -1.020762776 | gene-MA16_Dca003096 |

|               |              |                     |
|---------------|--------------|---------------------|
| novel_miR_280 | -1.020762776 | gene-MA16_Dca010390 |
| novel_miR_280 | -1.020762776 | gene-MA16_Dca022181 |
| novel_miR_280 | -1.020762776 | gene-MA16_Dca004775 |
| novel_miR_280 | -1.020762776 | gene-MA16_Dca023756 |
| novel_miR_280 | -1.020762776 | gene-MA16_Dca007605 |
| novel_miR_280 | -1.020762776 | gene-MA16_Dca005159 |
| novel_miR_280 | -1.020762776 | gene-MA16_Dca023943 |
| novel_miR_280 | -1.020762776 | gene-MA16_Dca020860 |
| novel_miR_280 | -1.020762776 | gene-MA16_Dca026072 |
| novel_miR_280 | -1.020762776 | gene-MA16_Dca012781 |
| novel_miR_280 | -1.020762776 | gene-MA16_Dca003665 |
| novel_miR_280 | -1.020762776 | gene-MA16_Dca001757 |
| novel_miR_280 | -1.020762776 | gene-MA16_Dca010749 |
| novel_miR_280 | -1.020762776 | gene-MA16_Dca020671 |
| novel_miR_280 | -1.020762776 | gene-MA16_Dca017663 |
| novel_miR_280 | -1.020762776 | gene-MA16_Dca012780 |
| novel_miR_280 | -1.020762776 | gene-MA16_Dca004095 |
| novel_miR_280 | -1.020762776 | gene-MA16_Dca023432 |
| novel_miR_280 | -1.020762776 | gene-MA16_Dca018979 |
| novel_miR_280 | -1.020762776 | gene-MA16_Dca002218 |
| novel_miR_280 | -1.020762776 | gene-MA16_Dca011246 |
| novel_miR_280 | -1.020762776 | gene-MA16_Dca003404 |
| novel_miR_280 | -1.020762776 | gene-MA16_Dca007171 |
| novel_miR_280 | -1.020762776 | gene-MA16_Dca019854 |
| novel_miR_280 | -1.020762776 | gene-MA16_Dca010102 |
| novel_miR_280 | -1.020762776 | gene-MA16_Dca009576 |
| novel_miR_280 | -1.020762776 | gene-MA16_Dca019643 |
| novel_miR_280 | -1.020762776 | gene-MA16_Dca009701 |
| novel_miR_280 | -1.020762776 | gene-MA16_Dca003212 |
| novel_miR_280 | -1.020762776 | gene-MA16_Dca015741 |
| novel_miR_280 | -1.020762776 | gene-MA16_Dca011329 |
| novel_miR_280 | -1.020762776 | gene-MA16_Dca008190 |
| novel_miR_280 | -1.020762776 | gene-MA16_Dca009084 |
| novel_miR_280 | -1.020762776 | gene-MA16_Dca013734 |
| novel_miR_280 | -1.020762776 | gene-MA16_Dca002597 |
| novel_miR_280 | -1.020762776 | gene-MA16_Dca002337 |
| novel_miR_280 | -1.020762776 | gene-MA16_Dca004293 |
| novel_miR_280 | -1.020762776 | gene-MA16_Dca003118 |
| novel_miR_280 | -1.020762776 | gene-MA16_Dca016948 |
| novel_miR_280 | -1.020762776 | gene-MA16_Dca015250 |
| novel_miR_280 | -1.020762776 | gene-MA16_Dca005798 |
| novel_miR_280 | -1.020762776 | gene-MA16_Dca001003 |
| novel_miR_280 | -1.020762776 | gene-MA16_Dca016504 |
| novel_miR_280 | -1.020762776 | gene-MA16_Dca009267 |
| novel_miR_280 | -1.020762776 | gene-MA16_Dca013779 |
| novel_miR_280 | -1.020762776 | gene-MA16_Dca006414 |

|               |              |                     |
|---------------|--------------|---------------------|
| novel_miR_280 | -1.020762776 | gene-MA16_Dca019173 |
| novel_miR_280 | -1.020762776 | gene-MA16_Dca017709 |
| novel_miR_280 | -1.020762776 | gene-MA16_Dca016510 |
| novel_miR_280 | -1.020762776 | gene-MA16_Dca015291 |
| novel_miR_280 | -1.020762776 | gene-MA16_Dca005992 |
| novel_miR_280 | -1.020762776 | gene-MA16_Dca013294 |
| novel_miR_280 | -1.020762776 | gene-MA16_Dca022196 |
| novel_miR_280 | -1.020762776 | gene-MA16_Dca018178 |
| novel_miR_280 | -1.020762776 | gene-MA16_Dca010665 |
| novel_miR_280 | -1.020762776 | gene-MA16_Dca002756 |
| novel_miR_280 | -1.020762776 | gene-MA16_Dca011027 |
| novel_miR_280 | -1.020762776 | gene-MA16_Dca017043 |
| novel_miR_280 | -1.020762776 | gene-MA16_Dca004102 |
| novel_miR_280 | -1.020762776 | gene-MA16_Dca027631 |
| novel_miR_280 | -1.020762776 | gene-MA16_Dca023559 |
| novel_miR_280 | -1.020762776 | gene-MA16_Dca011106 |
| novel_miR_280 | -1.020762776 | gene-MA16_Dca017541 |
| novel_miR_280 | -1.020762776 | gene-MA16_Dca000121 |
| novel_miR_280 | -1.020762776 | gene-MA16_Dca016374 |
| novel_miR_280 | -1.020762776 | gene-MA16_Dca008843 |
| novel_miR_280 | -1.020762776 | gene-MA16_Dca018560 |
| novel_miR_280 | -1.020762776 | gene-MA16_Dca001258 |
| novel_miR_280 | -1.020762776 | gene-MA16_Dca003197 |
| novel_miR_280 | -1.020762776 | gene-MA16_Dca012420 |
| novel_miR_287 | -0.647947681 | gene-MA16_Dca021780 |
| novel_miR_287 | -0.647947681 | gene-MA16_Dca024036 |
| novel_miR_287 | -0.647947681 | gene-MA16_Dca006916 |
| novel_miR_287 | -0.647947681 | gene-MA16_Dca024649 |
| novel_miR_287 | -0.647947681 | gene-MA16_Dca000440 |
| novel_miR_287 | -0.647947681 | gene-MA16_Dca009490 |
| novel_miR_287 | -0.647947681 | gene-MA16_Dca011627 |
| novel_miR_287 | -0.647947681 | gene-MA16_Dca006730 |
| novel_miR_287 | -0.647947681 | gene-MA16_Dca023929 |
| novel_miR_506 | -1.020760459 | gene-MA16_Dca003212 |
| novel_miR_506 | -1.020760459 | gene-MA16_Dca015741 |
| novel_miR_506 | -1.020760459 | gene-MA16_Dca011329 |
| novel_miR_506 | -1.020760459 | gene-MA16_Dca008190 |
| novel_miR_506 | -1.020760459 | gene-MA16_Dca009084 |
| novel_miR_506 | -1.020760459 | gene-MA16_Dca003404 |
| novel_miR_506 | -1.020760459 | gene-MA16_Dca007171 |
| novel_miR_506 | -1.020760459 | gene-MA16_Dca019854 |
| novel_miR_506 | -1.020760459 | gene-MA16_Dca010102 |
| novel_miR_506 | -1.020760459 | gene-MA16_Dca009576 |
| novel_miR_506 | -1.020760459 | gene-MA16_Dca009701 |
| novel_miR_506 | -1.020760459 | gene-MA16_Dca019643 |
| novel_miR_506 | -1.020760459 | gene-MA16_Dca016948 |

|               |              |                     |
|---------------|--------------|---------------------|
| novel_miR_506 | -1.020760459 | gene-MA16_Dca015250 |
| novel_miR_506 | -1.020760459 | gene-MA16_Dca005798 |
| novel_miR_506 | -1.020760459 | gene-MA16_Dca016504 |
| novel_miR_506 | -1.020760459 | gene-MA16_Dca001003 |
| novel_miR_506 | -1.020760459 | gene-MA16_Dca013779 |
| novel_miR_506 | -1.020760459 | gene-MA16_Dca009267 |
| novel_miR_506 | -1.020760459 | gene-MA16_Dca002597 |
| novel_miR_506 | -1.020760459 | gene-MA16_Dca013734 |
| novel_miR_506 | -1.020760459 | gene-MA16_Dca004293 |
| novel_miR_506 | -1.020760459 | gene-MA16_Dca002337 |
| novel_miR_506 | -1.020760459 | gene-MA16_Dca003118 |
| novel_miR_506 | -1.020760459 | gene-MA16_Dca016510 |
| novel_miR_506 | -1.020760459 | gene-MA16_Dca017709 |
| novel_miR_506 | -1.020760459 | gene-MA16_Dca015291 |
| novel_miR_506 | -1.020760459 | gene-MA16_Dca013294 |
| novel_miR_506 | -1.020760459 | gene-MA16_Dca005992 |
| novel_miR_506 | -1.020760459 | gene-MA16_Dca022196 |
| novel_miR_506 | -1.020760459 | gene-MA16_Dca006414 |
| novel_miR_506 | -1.020760459 | gene-MA16_Dca019173 |
| novel_miR_506 | -1.020760459 | gene-MA16_Dca000121 |
| novel_miR_506 | -1.020760459 | gene-MA16_Dca016374 |
| novel_miR_506 | -1.020760459 | gene-MA16_Dca008843 |
| novel_miR_506 | -1.020760459 | gene-MA16_Dca018560 |
| novel_miR_506 | -1.020760459 | gene-MA16_Dca001258 |
| novel_miR_506 | -1.020760459 | gene-MA16_Dca003197 |
| novel_miR_506 | -1.020760459 | gene-MA16_Dca012420 |
| novel_miR_506 | -1.020760459 | gene-MA16_Dca018178 |
| novel_miR_506 | -1.020760459 | gene-MA16_Dca010665 |
| novel_miR_506 | -1.020760459 | gene-MA16_Dca002756 |
| novel_miR_506 | -1.020760459 | gene-MA16_Dca011027 |
| novel_miR_506 | -1.020760459 | gene-MA16_Dca017043 |
| novel_miR_506 | -1.020760459 | gene-MA16_Dca004102 |
| novel_miR_506 | -1.020760459 | gene-MA16_Dca011106 |
| novel_miR_506 | -1.020760459 | gene-MA16_Dca027631 |
| novel_miR_506 | -1.020760459 | gene-MA16_Dca023559 |
| novel_miR_506 | -1.020760459 | gene-MA16_Dca017541 |
| novel_miR_506 | -1.020760459 | gene-MA16_Dca023290 |
| novel_miR_506 | -1.020760459 | gene-MA16_Dca008635 |
| novel_miR_506 | -1.020760459 | gene-MA16_Dca000122 |
| novel_miR_506 | -1.020760459 | gene-MA16_Dca000505 |
| novel_miR_506 | -1.020760459 | gene-MA16_Dca014483 |
| novel_miR_506 | -1.020760459 | gene-MA16_Dca012806 |
| novel_miR_506 | -1.020760459 | gene-MA16_Dca023581 |
| novel_miR_506 | -1.020760459 | gene-MA16_Dca026290 |
| novel_miR_506 | -1.020760459 | gene-MA16_Dca006234 |
| novel_miR_506 | -1.020760459 | gene-MA16_Dca019870 |

|               |              |                     |
|---------------|--------------|---------------------|
| novel_miR_506 | -1.020760459 | gene-MA16_Dca019243 |
| novel_miR_506 | -1.020760459 | gene-MA16_Dca022292 |
| novel_miR_506 | -1.020760459 | gene-MA16_Dca008936 |
| novel_miR_506 | -1.020760459 | gene-MA16_Dca021320 |
| novel_miR_506 | -1.020760459 | gene-MA16_Dca006228 |
| novel_miR_506 | -1.020760459 | gene-MA16_Dca005089 |
| novel_miR_506 | -1.020760459 | gene-MA16_Dca022914 |
| novel_miR_506 | -1.020760459 | gene-MA16_Dca009985 |
| novel_miR_506 | -1.020760459 | gene-MA16_Dca007184 |
| novel_miR_506 | -1.020760459 | gene-MA16_Dca003096 |
| novel_miR_506 | -1.020760459 | gene-MA16_Dca007682 |
| novel_miR_506 | -1.020760459 | gene-MA16_Dca010390 |
| novel_miR_506 | -1.020760459 | gene-MA16_Dca022181 |
| novel_miR_506 | -1.020760459 | gene-MA16_Dca004775 |
| novel_miR_506 | -1.020760459 | gene-MA16_Dca023756 |
| novel_miR_506 | -1.020760459 | gene-MA16_Dca007605 |
| novel_miR_506 | -1.020760459 | gene-MA16_Dca009642 |
| novel_miR_506 | -1.020760459 | gene-MA16_Dca020263 |
| novel_miR_506 | -1.020760459 | gene-MA16_Dca019648 |
| novel_miR_506 | -1.020760459 | gene-MA16_Dca013592 |
| novel_miR_506 | -1.020760459 | gene-MA16_Dca005939 |
| novel_miR_506 | -1.020760459 | gene-MA16_Dca003381 |
| novel_miR_506 | -1.020760459 | gene-MA16_Dca004513 |
| novel_miR_506 | -1.020760459 | gene-MA16_Dca012896 |
| novel_miR_506 | -1.020760459 | gene-MA16_Dca025963 |
| novel_miR_506 | -1.020760459 | gene-MA16_Dca021885 |
| novel_miR_506 | -1.020760459 | gene-MA16_Dca018979 |
| novel_miR_506 | -1.020760459 | gene-MA16_Dca023432 |
| novel_miR_506 | -1.020760459 | gene-MA16_Dca011246 |
| novel_miR_506 | -1.020760459 | gene-MA16_Dca002218 |
| novel_miR_506 | -1.020760459 | gene-MA16_Dca005159 |
| novel_miR_506 | -1.020760459 | gene-MA16_Dca023943 |
| novel_miR_506 | -1.020760459 | gene-MA16_Dca020860 |
| novel_miR_506 | -1.020760459 | gene-MA16_Dca026072 |
| novel_miR_506 | -1.020760459 | gene-MA16_Dca012781 |
| novel_miR_506 | -1.020760459 | gene-MA16_Dca010749 |
| novel_miR_506 | -1.020760459 | gene-MA16_Dca003665 |
| novel_miR_506 | -1.020760459 | gene-MA16_Dca001757 |
| novel_miR_506 | -1.020760459 | gene-MA16_Dca017663 |
| novel_miR_506 | -1.020760459 | gene-MA16_Dca020671 |
| novel_miR_506 | -1.020760459 | gene-MA16_Dca012780 |
| novel_miR_506 | -1.020760459 | gene-MA16_Dca004095 |
| miR408_5p     | -1.45887466  | gene-MA16_Dca006187 |
| miR408_5p     | -1.45887466  | gene-MA16_Dca025324 |
| miR408_5p     | -1.45887466  | gene-MA16_Dca020801 |
| miR408_5p     | -1.45887466  | gene-MA16_Dca018282 |

|               |             |                     |
|---------------|-------------|---------------------|
| miR408_5p     | -1.45887466 | gene-MA16_Dca007809 |
| miR408_5p     | -1.45887466 | gene-MA16_Dca002968 |
| miR408_5p     | -1.45887466 | gene-MA16_Dca014182 |
| miR408_5p     | -1.45887466 | gene-MA16_Dca013452 |
| miR408_5p     | -1.45887466 | gene-MA16_Dca023283 |
| miR408_5p     | -1.45887466 | gene-MA16_Dca022320 |
| miR408_5p     | -1.45887466 | gene-MA16_Dca022503 |
| miR408_5p     | -1.45887466 | gene-MA16_Dca012776 |
| miR408_5p     | -1.45887466 | gene-MA16_Dca021620 |
|               |             | novel_miR_202       |
|               |             | 0.855751983         |
| novel_miR_202 | 0.855751983 | gene-MA16_Dca003551 |
| novel_miR_202 | 0.855751983 | gene-MA16_Dca023726 |
| novel_miR_202 | 0.855751983 | gene-MA16_Dca027179 |
| novel_miR_202 | 0.855751983 | gene-MA16_Dca015527 |
| novel_miR_202 | 0.855751983 | gene-MA16_Dca025989 |
| novel_miR_202 | 0.855751983 | gene-MA16_Dca027946 |
| novel_miR_202 | 0.855751983 | gene-MA16_Dca015912 |
| novel_miR_202 | 0.855751983 | gene-MA16_Dca027976 |
| novel_miR_202 | 0.855751983 | gene-MA16_Dca003689 |
| novel_miR_202 | 0.855751983 | gene-MA16_Dca012698 |
| novel_miR_202 | 0.855751983 | gene-MA16_Dca004912 |
| novel_miR_202 | 0.855751983 | gene-MA16_Dca016948 |
| novel_miR_202 | 0.855751983 | gene-MA16_Dca005929 |
| novel_miR_202 | 0.855751983 | gene-MA16_Dca017812 |
| novel_miR_202 | 0.855751983 | gene-MA16_Dca005529 |
| novel_miR_202 | 0.855751983 | gene-MA16_Dca028117 |
| novel_miR_202 | 0.855751983 | gene-MA16_Dca015720 |
| novel_miR_202 | 0.855751983 | gene-MA16_Dca016419 |
| novel_miR_202 | 0.855751983 | gene-MA16_Dca026801 |
| novel_miR_202 | 0.855751983 | gene-MA16_Dca019346 |
| novel_miR_202 | 0.855751983 | gene-MA16_Dca022009 |
| novel_miR_202 | 0.855751983 | gene-MA16_Dca026108 |
| novel_miR_202 | 0.855751983 | gene-MA16_Dca028824 |
| novel_miR_202 | 0.855751983 | gene-MA16_Dca017373 |
| novel_miR_202 | 0.855751983 | gene-MA16_Dca017912 |
| novel_miR_202 | 0.855751983 | gene-MA16_Dca024245 |
| novel_miR_202 | 0.855751983 | gene-MA16_Dca011928 |
| novel_miR_202 | 0.855751983 | gene-MA16_Dca021654 |
| novel_miR_45  | 0.886643802 | gene-MA16_Dca005043 |
| novel_miR_45  | 0.886643802 | gene-MA16_Dca019234 |
| novel_miR_45  | 0.886643802 | gene-MA16_Dca024771 |
| novel_miR_45  | 0.886643802 | gene-MA16_Dca009889 |
| novel_miR_45  | 0.886643802 | gene-MA16_Dca007090 |
| novel_miR_45  | 0.886643802 | gene-MA16_Dca003489 |
| novel_miR_45  | 0.886643802 | gene-MA16_Dca008938 |

|              |             |                     |
|--------------|-------------|---------------------|
| novel_miR_45 | 0.886643802 | gene-MA16_Dca011854 |
| novel_miR_45 | 0.886643802 | gene-MA16_Dca012991 |
| novel_miR_45 | 0.886643802 | gene-MA16_Dca025486 |
| novel_miR_45 | 0.886643802 | gene-MA16_Dca001590 |
| novel_miR_45 | 0.886643802 | gene-MA16_Dca012774 |
| novel_miR_45 | 0.886643802 | gene-MA16_Dca010838 |
| novel_miR_45 | 0.886643802 | gene-MA16_Dca008335 |
| miR396b_3p   | 0.953858207 | gene-MA16_Dca026208 |
| miR396b_3p   | 0.953858207 | gene-MA16_Dca008181 |
| miR396b_3p   | 0.953858207 | gene-MA16_Dca015968 |
| miR396b_3p   | 0.953858207 | gene-MA16_Dca006688 |
| miR396b_3p   | 0.953858207 | gene-MA16_Dca018822 |
| miR396b_3p   | 0.953858207 | gene-MA16_Dca014117 |
| miR396b_3p   | 0.953858207 | gene-MA16_Dca015480 |
| miR396b_3p   | 0.953858207 | gene-MA16_Dca001294 |
| miR396b_3p   | 0.953858207 | gene-MA16_Dca003662 |
| miR396b_3p   | 0.953858207 | gene-MA16_Dca022078 |
| miR396b_3p   | 0.953858207 | gene-MA16_Dca020272 |
| miR396b_3p   | 0.953858207 | gene-MA16_Dca017621 |
| miR396b_3p   | 0.953858207 | gene-MA16_Dca009793 |
| miR396b_3p   | 0.953858207 | gene-MA16_Dca003664 |
| miR396b_3p   | 0.953858207 | gene-MA16_Dca010894 |
| miR396b_3p   | 0.953858207 | gene-MA16_Dca010653 |
| miR396b_3p   | 0.953858207 | gene-MA16_Dca022876 |
| miR396b_3p   | 0.953858207 | gene-MA16_Dca005699 |
| miR396b_3p   | 0.953858207 | gene-MA16_Dca027789 |
| miR396b_3p   | 0.953858207 | gene-MA16_Dca005341 |
| miR396b_3p   | 0.953858207 | gene-MA16_Dca012062 |
| miR396b_3p   | 0.953858207 | gene-MA16_Dca004712 |
| miR396b_3p   | 0.953858207 | gene-MA16_Dca013400 |
| miR396b_3p   | 0.953858207 | gene-MA16_Dca007582 |
| miR396b_3p   | 0.953858207 | gene-MA16_Dca023402 |
| miR396b_3p   | 0.953858207 | gene-MA16_Dca003014 |
| miR396b_3p   | 0.953858207 | gene-MA16_Dca006076 |
| miR396b_3p   | 0.953858207 | gene-MA16_Dca014625 |
| miR396b_3p   | 0.953858207 | gene-MA16_Dca020802 |
| miR396b_3p   | 0.953858207 | gene-MA16_Dca001239 |
| miR396b_3p   | 0.953858207 | gene-MA16_Dca027486 |
| miR396b_3p   | 0.953858207 | gene-MA16_Dca001761 |
| miR396b_3p   | 0.953858207 | gene-MA16_Dca022596 |
| miR396b_3p   | 0.953858207 | gene-MA16_Dca005778 |
| miR396b_3p   | 0.953858207 | gene-MA16_Dca024206 |
| miR396b_3p   | 0.953858207 | gene-MA16_Dca017707 |
| miR396b_3p   | 0.953858207 | gene-MA16_Dca013600 |
| miR4387e     | 1.098733759 | gene-MA16_Dca010295 |
| miR4387e     | 1.098733759 | gene-MA16_Dca012689 |

|               |              |                     |
|---------------|--------------|---------------------|
| novel_miR_220 | -0.59936991  | gene-MA16_Dca017059 |
| novel_miR_220 | -0.59936991  | gene-MA16_Dca013211 |
| novel_miR_501 | 0.648918365  | gene-MA16_Dca023667 |
| novel_miR_501 | 0.648918365  | gene-MA16_Dca020360 |
| novel_miR_501 | 0.648918365  | gene-MA16_Dca021751 |
| novel_miR_501 | 0.648918365  | gene-MA16_Dca020021 |
| novel_miR_501 | 0.648918365  | gene-MA16_Dca026376 |
| novel_miR_501 | 0.648918365  | gene-MA16_Dca020924 |
| novel_miR_501 | 0.648918365  | gene-MA16_Dca024999 |
| novel_miR_501 | 0.648918365  | gene-MA16_Dca005077 |
| novel_miR_501 | 0.648918365  | gene-MA16_Dca022668 |
| novel_miR_501 | 0.648918365  | gene-MA16_Dca010934 |
| novel_miR_501 | 0.648918365  | gene-MA16_Dca023672 |
| novel_miR_501 | 0.648918365  | gene-MA16_Dca022482 |
| novel_miR_501 | 0.648918365  | gene-MA16_Dca015559 |
| novel_miR_501 | 0.648918365  | gene-MA16_Dca020386 |
| novel_miR_501 | 0.648918365  | gene-MA16_Dca014238 |
| novel_miR_501 | 0.648918365  | gene-MA16_Dca005251 |
| novel_miR_501 | 0.648918365  | gene-MA16_Dca017447 |
| novel_miR_180 | -0.663108588 | gene-MA16_Dca009629 |
| novel_miR_180 | -0.663108588 | gene-MA16_Dca009628 |
| novel_miR_180 | -0.663108588 | gene-MA16_Dca023796 |
| novel_miR_180 | -0.663108588 | gene-MA16_Dca002782 |
| novel_miR_180 | -0.663108588 | gene-MA16_Dca020882 |
| novel_miR_180 | -0.663108588 | gene-MA16_Dca011590 |
| novel_miR_180 | -0.663108588 | gene-MA16_Dca013202 |
| novel_miR_180 | -0.663108588 | gene-MA16_Dca021909 |
| novel_miR_180 | -0.663108588 | gene-MA16_Dca021285 |
| novel_miR_180 | -0.663108588 | gene-MA16_Dca026967 |
| novel_miR_180 | -0.663108588 | gene-MA16_Dca016402 |
| novel_miR_180 | -0.663108588 | gene-MA16_Dca015434 |
| novel_miR_180 | -0.663108588 | gene-MA16_Dca024328 |
| novel_miR_180 | -0.663108588 | gene-MA16_Dca017666 |
| novel_miR_180 | -0.663108588 | gene-MA16_Dca017578 |
| novel_miR_180 | -0.663108588 | gene-MA16_Dca001496 |
| novel_miR_180 | -0.663108588 | gene-MA16_Dca024154 |
| novel_miR_180 | -0.663108588 | gene-MA16_Dca021423 |
| novel_miR_180 | -0.663108588 | gene-MA16_Dca000889 |
| novel_miR_180 | -0.663108588 | gene-MA16_Dca005161 |
| novel_miR_180 | -0.663108588 | gene-MA16_Dca025505 |
| novel_miR_180 | -0.663108588 | gene-MA16_Dca009052 |
| novel_miR_180 | -0.663108588 | gene-MA16_Dca000422 |
| novel_miR_180 | -0.663108588 | gene-MA16_Dca001153 |
| novel_miR_180 | -0.663108588 | gene-MA16_Dca013631 |
| novel_miR_180 | -0.663108588 | gene-MA16_Dca007347 |
| novel_miR_180 | -0.663108588 | gene-MA16_Dca011965 |

|               |              |                     |
|---------------|--------------|---------------------|
| novel_miR_180 | -0.663108588 | gene-MA16_Dca027199 |
| novel_miR_180 | -0.663108588 | gene-MA16_Dca005930 |
| novel_miR_180 | -0.663108588 | gene-MA16_Dca011869 |
| novel_miR_180 | -0.663108588 | gene-MA16_Dca020020 |
| novel_miR_180 | -0.663108588 | gene-MA16_Dca020331 |
| novel_miR_180 | -0.663108588 | gene-MA16_Dca008388 |
| novel_miR_180 | -0.663108588 | gene-MA16_Dca017689 |
| novel_miR_180 | -0.663108588 | gene-MA16_Dca011409 |
| novel_miR_180 | -0.663108588 | gene-MA16_Dca003158 |
| novel_miR_180 | -0.663108588 | gene-MA16_Dca009868 |
| novel_miR_180 | -0.663108588 | gene-MA16_Dca011489 |
| novel_miR_180 | -0.663108588 | gene-MA16_Dca003339 |
| novel_miR_180 | -0.663108588 | gene-MA16_Dca011481 |
| novel_miR_180 | -0.663108588 | gene-MA16_Dca007171 |
| novel_miR_180 | -0.663108588 | gene-MA16_Dca024966 |
| novel_miR_180 | -0.663108588 | gene-MA16_Dca003354 |
| novel_miR_180 | -0.663108588 | gene-MA16_Dca007191 |
| novel_miR_180 | -0.663108588 | gene-MA16_Dca026850 |
| novel_miR_180 | -0.663108588 | gene-MA16_Dca003270 |
| novel_miR_180 | -0.663108588 | gene-MA16_Dca000617 |
| novel_miR_180 | -0.663108588 | gene-MA16_Dca006230 |
| novel_miR_180 | -0.663108588 | gene-MA16_Dca023911 |
| novel_miR_180 | -0.663108588 | gene-MA16_Dca016806 |
| novel_miR_180 | -0.663108588 | gene-MA16_Dca021754 |
| novel_miR_180 | -0.663108588 | gene-MA16_Dca003102 |
| novel_miR_180 | -0.663108588 | gene-MA16_Dca016487 |
| novel_miR_180 | -0.663108588 | gene-MA16_Dca008238 |
| novel_miR_180 | -0.663108588 | gene-MA16_Dca008911 |
| novel_miR_180 | -0.663108588 | gene-MA16_Dca011166 |
| novel_miR_180 | -0.663108588 | gene-MA16_Dca007583 |
| novel_miR_180 | -0.663108588 | gene-MA16_Dca021760 |
| novel_miR_180 | -0.663108588 | gene-MA16_Dca020137 |
| novel_miR_180 | -0.663108588 | gene-MA16_Dca015677 |
| novel_miR_180 | -0.663108588 | gene-MA16_Dca017986 |
| novel_miR_180 | -0.663108588 | gene-MA16_Dca007177 |
| novel_miR_180 | -0.663108588 | gene-MA16_Dca006167 |
| novel_miR_180 | -0.663108588 | gene-MA16_Dca016488 |
| novel_miR_180 | -0.663108588 | gene-MA16_Dca018635 |
| novel_miR_180 | -0.663108588 | gene-MA16_Dca006505 |
| novel_miR_180 | -0.663108588 | gene-MA16_Dca027198 |
| novel_miR_180 | -0.663108588 | gene-MA16_Dca014467 |
| novel_miR_180 | -0.663108588 | gene-MA16_Dca011374 |
| novel_miR_180 | -0.663108588 | gene-MA16_Dca002239 |
| novel_miR_115 | -0.590319003 | gene-MA16_Dca013211 |
| novel_miR_115 | -0.590319003 | gene-MA16_Dca017059 |
| novel_miR_425 | 0.62445181   | gene-MA16_Dca012177 |

|               |              |                     |
|---------------|--------------|---------------------|
| novel_miR_425 | 0.62445181   | gene-MA16_Dca021600 |
| novel_miR_425 | 0.62445181   | gene-MA16_Dca022152 |
| novel_miR_425 | 0.62445181   | gene-MA16_Dca022444 |
| novel_miR_425 | 0.62445181   | gene-MA16_Dca024641 |
| novel_miR_99  | 0.645554446  | gene-MA16_Dca021498 |
| novel_miR_99  | 0.645554446  | gene-MA16_Dca011199 |
| novel_miR_496 | 0.817053762  | gene-MA16_Dca011647 |
| miR857        | -0.739412556 | gene-MA16_Dca011056 |
| miR857        | -0.739412556 | gene-MA16_Dca023413 |
| miR857        | -0.739412556 | gene-MA16_Dca013080 |
| miR857        | -0.739412556 | gene-MA16_Dca021249 |
| miR857        | -0.739412556 | gene-MA16_Dca011207 |
| miR857        | -0.739412556 | gene-MA16_Dca007591 |
| miR857        | -0.739412556 | gene-MA16_Dca005380 |
| miR857        | -0.739412556 | gene-MA16_Dca027103 |
| novel_miR_159 | -0.612642562 | gene-MA16_Dca013669 |
| novel_miR_159 | -0.612642562 | gene-MA16_Dca015045 |
| novel_miR_159 | -0.612642562 | gene-MA16_Dca016284 |
| novel_miR_159 | -0.612642562 | gene-MA16_Dca018922 |
| novel_miR_159 | -0.612642562 | gene-MA16_Dca007765 |
| novel_miR_159 | -0.612642562 | gene-MA16_Dca007257 |
| novel_miR_159 | -0.612642562 | gene-MA16_Dca026264 |
| novel_miR_159 | -0.612642562 | gene-MA16_Dca020115 |
| novel_miR_159 | -0.612642562 | gene-MA16_Dca001020 |
| novel_miR_159 | -0.612642562 | gene-MA16_Dca001828 |
| novel_miR_159 | -0.612642562 | gene-MA16_Dca016652 |
| novel_miR_159 | -0.612642562 | gene-MA16_Dca027076 |
| novel_miR_159 | -0.612642562 | gene-MA16_Dca013843 |
| novel_miR_159 | -0.612642562 | gene-MA16_Dca008856 |
| novel_miR_159 | -0.612642562 | gene-MA16_Dca006592 |
| novel_miR_159 | -0.612642562 | gene-MA16_Dca021824 |
| novel_miR_159 | -0.612642562 | gene-MA16_Dca006324 |
| novel_miR_159 | -0.612642562 | gene-MA16_Dca014974 |
| novel_miR_159 | -0.612642562 | gene-MA16_Dca022392 |
| novel_miR_159 | -0.612642562 | gene-MA16_Dca010817 |
| novel_miR_159 | -0.612642562 | gene-MA16_Dca007613 |
| novel_miR_159 | -0.612642562 | gene-MA16_Dca017065 |
| novel_miR_159 | -0.612642562 | gene-MA16_Dca007050 |
| novel_miR_159 | -0.612642562 | gene-MA16_Dca005372 |
| novel_miR_159 | -0.612642562 | gene-MA16_Dca022401 |
| novel_miR_159 | -0.612642562 | gene-MA16_Dca007408 |
| novel_miR_159 | -0.612642562 | gene-MA16_Dca016389 |
| novel_miR_159 | -0.612642562 | gene-MA16_Dca016013 |
| novel_miR_159 | -0.612642562 | gene-MA16_Dca012490 |
| novel_miR_159 | -0.612642562 | gene-MA16_Dca021414 |
| novel_miR_159 | -0.612642562 | gene-MA16_Dca011522 |

|               |              |                     |
|---------------|--------------|---------------------|
| novel_miR_159 | -0.612642562 | gene-MA16_Dca015083 |
| novel_miR_159 | -0.612642562 | gene-MA16_Dca006829 |
| novel_miR_159 | -0.612642562 | gene-MA16_Dca014007 |
| novel_miR_159 | -0.612642562 | gene-MA16_Dca006179 |
| novel_miR_159 | -0.612642562 | gene-MA16_Dca019278 |
| novel_miR_159 | -0.612642562 | gene-MA16_Dca001444 |
| novel_miR_159 | -0.612642562 | gene-MA16_Dca014143 |
| novel_miR_159 | -0.612642562 | gene-MA16_Dca019818 |
| novel_miR_159 | -0.612642562 | gene-MA16_Dca015975 |
| novel_miR_159 | -0.612642562 | gene-MA16_Dca006828 |
| novel_miR_159 | -0.612642562 | gene-MA16_Dca023636 |
| novel_miR_159 | -0.612642562 | gene-MA16_Dca027407 |
| novel_miR_159 | -0.612642562 | gene-MA16_Dca002029 |
| novel_miR_159 | -0.612642562 | gene-MA16_Dca001924 |
| novel_miR_159 | -0.612642562 | gene-MA16_Dca022572 |
| novel_miR_159 | -0.612642562 | gene-MA16_Dca010252 |
| novel_miR_159 | -0.612642562 | gene-MA16_Dca023553 |
| novel_miR_159 | -0.612642562 | gene-MA16_Dca005107 |
| novel_miR_159 | -0.612642562 | gene-MA16_Dca024023 |
| novel_miR_159 | -0.612642562 | gene-MA16_Dca024366 |
| novel_miR_159 | -0.612642562 | gene-MA16_Dca002789 |
| novel_miR_159 | -0.612642562 | gene-MA16_Dca019273 |
| novel_miR_159 | -0.612642562 | gene-MA16_Dca011278 |
| novel_miR_159 | -0.612642562 | gene-MA16_Dca018789 |
| novel_miR_159 | -0.612642562 | gene-MA16_Dca018071 |
| novel_miR_159 | -0.612642562 | gene-MA16_Dca021047 |
| novel_miR_159 | -0.612642562 | gene-MA16_Dca003342 |
| novel_miR_159 | -0.612642562 | gene-MA16_Dca005616 |
| novel_miR_159 | -0.612642562 | gene-MA16_Dca025367 |
| novel_miR_159 | -0.612642562 | gene-MA16_Dca028626 |
| novel_miR_159 | -0.612642562 | gene-MA16_Dca012922 |
| miR159k_3p_1  | -0.734955031 | gene-MA16_Dca006397 |
| miR159k_3p_1  | -0.734955031 | gene-MA16_Dca010165 |
| miR159k_3p_1  | -0.734955031 | gene-MA16_Dca001340 |
| miR159k_3p_1  | -0.734955031 | gene-MA16_Dca011035 |
| miR159k_3p_1  | -0.734955031 | gene-MA16_Dca024728 |
| miR159k_3p_1  | -0.734955031 | gene-MA16_Dca027107 |
| miR159k_3p_1  | -0.734955031 | gene-MA16_Dca015701 |
| miR159k_3p_1  | -0.734955031 | gene-MA16_Dca023804 |
| miR159k_3p_1  | -0.734955031 | gene-MA16_Dca007257 |
| miR159k_3p_1  | -0.734955031 | gene-MA16_Dca012195 |
| miR159k_3p_1  | -0.734955031 | gene-MA16_Dca022241 |
| miR159k_3p_1  | -0.734955031 | gene-MA16_Dca012890 |
| miR159k_3p_1  | -0.734955031 | gene-MA16_Dca016851 |
| miR159k_3p_1  | -0.734955031 | gene-MA16_Dca014760 |
| miR159k_3p_1  | -0.734955031 | gene-MA16_Dca016112 |

|              |              |                     |
|--------------|--------------|---------------------|
| miR159k_3p_1 | -0.734955031 | gene-MA16_Dca027066 |
| miR159k_3p_1 | -0.734955031 | gene-MA16_Dca019334 |
| miR159k_3p_1 | -0.734955031 | gene-MA16_Dca008623 |
| miR159k_3p_1 | -0.734955031 | gene-MA16_Dca018586 |
| miR159k_3p_1 | -0.734955031 | gene-MA16_Dca000984 |
| miR159k_3p_1 | -0.734955031 | gene-MA16_Dca028065 |
| miR159k_3p_1 | -0.734955031 | gene-MA16_Dca025400 |
| miR159k_3p_1 | -0.734955031 | gene-MA16_Dca020624 |
| miR159k_3p_1 | -0.734955031 | gene-MA16_Dca024208 |
| miR159k_3p_1 | -0.734955031 | gene-MA16_Dca000350 |
| miR159k_3p_1 | -0.734955031 | gene-MA16_Dca005171 |
| miR159k_3p_1 | -0.734955031 | gene-MA16_Dca008624 |
| miR159k_3p_1 | -0.734955031 | gene-MA16_Dca011457 |
| miR159k_3p_1 | -0.734955031 | gene-MA16_Dca019561 |
| miR159k_3p_1 | -0.734955031 | gene-MA16_Dca026772 |
| miR159k_3p_1 | -0.734955031 | gene-MA16_Dca019205 |
| miR159k_3p_1 | -0.734955031 | gene-MA16_Dca028002 |
| miR159k_3p_1 | -0.734955031 | gene-MA16_Dca001826 |
| miR159k_3p_1 | -0.734955031 | gene-MA16_Dca024127 |
| miR159k_3p_1 | -0.734955031 | gene-MA16_Dca000803 |
| miR159k_3p_1 | -0.734955031 | gene-MA16_Dca007034 |
| miR159k_3p_1 | -0.734955031 | gene-MA16_Dca024152 |
| miR159k_3p_1 | -0.734955031 | gene-MA16_Dca019932 |
| miR159k_3p_1 | -0.734955031 | gene-MA16_Dca010603 |
| miR159k_3p_1 | -0.734955031 | gene-MA16_Dca019600 |
| miR159k_3p_1 | -0.734955031 | gene-MA16_Dca024876 |
| miR159k_3p_1 | -0.734955031 | gene-MA16_Dca012038 |
| miR159k_3p_1 | -0.734955031 | gene-MA16_Dca020483 |
| miR159k_3p_1 | -0.734955031 | gene-MA16_Dca003039 |
| miR159k_3p_1 | -0.734955031 | gene-MA16_Dca027323 |
| miR159k_3p_1 | -0.734955031 | gene-MA16_Dca020254 |
| miR159k_3p_1 | -0.734955031 | gene-MA16_Dca025429 |
| miR159k_3p_2 | -0.734952601 | gene-MA16_Dca008624 |
| miR159k_3p_2 | -0.734952601 | gene-MA16_Dca000350 |
| miR159k_3p_2 | -0.734952601 | gene-MA16_Dca005171 |
| miR159k_3p_2 | -0.734952601 | gene-MA16_Dca001826 |
| miR159k_3p_2 | -0.734952601 | gene-MA16_Dca028002 |
| miR159k_3p_2 | -0.734952601 | gene-MA16_Dca019561 |
| miR159k_3p_2 | -0.734952601 | gene-MA16_Dca011457 |
| miR159k_3p_2 | -0.734952601 | gene-MA16_Dca019205 |
| miR159k_3p_2 | -0.734952601 | gene-MA16_Dca026772 |
| miR159k_3p_2 | -0.734952601 | gene-MA16_Dca019600 |
| miR159k_3p_2 | -0.734952601 | gene-MA16_Dca010603 |
| miR159k_3p_2 | -0.734952601 | gene-MA16_Dca000803 |
| miR159k_3p_2 | -0.734952601 | gene-MA16_Dca024127 |
| miR159k_3p_2 | -0.734952601 | gene-MA16_Dca019932 |

|               |              |                     |
|---------------|--------------|---------------------|
| miR159k_3p_2  | -0.734952601 | gene-MA16_Dca024152 |
| miR159k_3p_2  | -0.734952601 | gene-MA16_Dca007034 |
| miR159k_3p_2  | -0.734952601 | gene-MA16_Dca027323 |
| miR159k_3p_2  | -0.734952601 | gene-MA16_Dca003039 |
| miR159k_3p_2  | -0.734952601 | gene-MA16_Dca025429 |
| miR159k_3p_2  | -0.734952601 | gene-MA16_Dca020254 |
| miR159k_3p_2  | -0.734952601 | gene-MA16_Dca012038 |
| miR159k_3p_2  | -0.734952601 | gene-MA16_Dca024876 |
| miR159k_3p_2  | -0.734952601 | gene-MA16_Dca020483 |
| miR159k_3p_2  | -0.734952601 | gene-MA16_Dca027107 |
| miR159k_3p_2  | -0.734952601 | gene-MA16_Dca024728 |
| miR159k_3p_2  | -0.734952601 | gene-MA16_Dca011035 |
| miR159k_3p_2  | -0.734952601 | gene-MA16_Dca023804 |
| miR159k_3p_2  | -0.734952601 | gene-MA16_Dca015701 |
| miR159k_3p_2  | -0.734952601 | gene-MA16_Dca010165 |
| miR159k_3p_2  | -0.734952601 | gene-MA16_Dca006397 |
| miR159k_3p_2  | -0.734952601 | gene-MA16_Dca001340 |
| miR159k_3p_2  | -0.734952601 | gene-MA16_Dca012890 |
| miR159k_3p_2  | -0.734952601 | gene-MA16_Dca014760 |
| miR159k_3p_2  | -0.734952601 | gene-MA16_Dca016851 |
| miR159k_3p_2  | -0.734952601 | gene-MA16_Dca012195 |
| miR159k_3p_2  | -0.734952601 | gene-MA16_Dca007257 |
| miR159k_3p_2  | -0.734952601 | gene-MA16_Dca022241 |
| miR159k_3p_2  | -0.734952601 | gene-MA16_Dca008623 |
| miR159k_3p_2  | -0.734952601 | gene-MA16_Dca018586 |
| miR159k_3p_2  | -0.734952601 | gene-MA16_Dca016112 |
| miR159k_3p_2  | -0.734952601 | gene-MA16_Dca019334 |
| miR159k_3p_2  | -0.734952601 | gene-MA16_Dca027066 |
| miR159k_3p_2  | -0.734952601 | gene-MA16_Dca025400 |
| miR159k_3p_2  | -0.734952601 | gene-MA16_Dca020624 |
| miR159k_3p_2  | -0.734952601 | gene-MA16_Dca024208 |
| miR159k_3p_2  | -0.734952601 | gene-MA16_Dca028065 |
| miR159k_3p_2  | -0.734952601 | gene-MA16_Dca000984 |
| novel_miR_71  | 0.946415698  | gene-MA16_Dca025956 |
| novel_miR_236 | 0.673287052  | gene-MA16_Dca026583 |
| novel_miR_236 | 0.673287052  | gene-MA16_Dca017549 |
| novel_miR_236 | 0.673287052  | gene-MA16_Dca002308 |
| novel_miR_236 | 0.673287052  | gene-MA16_Dca004606 |
| novel_miR_236 | 0.673287052  | gene-MA16_Dca007852 |
| novel_miR_236 | 0.673287052  | gene-MA16_Dca011099 |
| novel_miR_236 | 0.673287052  | gene-MA16_Dca007249 |
| novel_miR_236 | 0.673287052  | gene-MA16_Dca003804 |
| novel_miR_236 | 0.673287052  | gene-MA16_Dca014769 |
| novel_miR_244 | 0.946575693  | gene-MA16_Dca025956 |
| novel_miR_23  | -0.737786958 | gene-MA16_Dca021085 |
| novel_miR_23  | -0.737786958 | gene-MA16_Dca006313 |

|               |             |                     |
|---------------|-------------|---------------------|
| novel_miR_233 | 0.771104321 | gene-MA16_Dca009077 |
| novel_miR_233 | 0.771104321 | gene-MA16_Dca003862 |
| novel_miR_233 | 0.771104321 | gene-MA16_Dca016068 |
| novel_miR_233 | 0.771104321 | gene-MA16_Dca002910 |
| miR5523       | 2.720618247 | gene-MA16_Dca014098 |
| miR5523       | 2.720618247 | gene-MA16_Dca026585 |
| miR5523       | 2.720618247 | gene-MA16_Dca021919 |
| miR5523       | 2.720618247 | gene-MA16_Dca015175 |
| miR5523       | 2.720618247 | gene-MA16_Dca004307 |
| miR5523       | 2.720618247 | gene-MA16_Dca006944 |
| miR5523       | 2.720618247 | gene-MA16_Dca007917 |
| miR5523       | 2.720618247 | gene-MA16_Dca028513 |
| miR5523       | 2.720618247 | gene-MA16_Dca012642 |
| miR5523       | 2.720618247 | gene-MA16_Dca026781 |
| miR5523       | 2.720618247 | gene-MA16_Dca022690 |
| miR396b_3     | 0.656895787 | gene-MA16_Dca011294 |
| miR396b_3     | 0.656895787 | gene-MA16_Dca002242 |
| miR396b_3     | 0.656895787 | gene-MA16_Dca001955 |
| miR396b_3     | 0.656895787 | gene-MA16_Dca010163 |
| miR396b_3     | 0.656895787 | gene-MA16_Dca010619 |
| miR396b_3     | 0.656895787 | gene-MA16_Dca020583 |
| miR396b_3     | 0.656895787 | gene-MA16_Dca012128 |
| miR396b_3     | 0.656895787 | gene-MA16_Dca026927 |
| miR396b_3     | 0.656895787 | gene-MA16_Dca006631 |
| miR396b_3     | 0.656895787 | gene-MA16_Dca004093 |
| miR396b_3     | 0.656895787 | gene-MA16_Dca002377 |
| miR396b_3     | 0.656895787 | gene-MA16_Dca001199 |
| miR396b_3     | 0.656895787 | gene-MA16_Dca006179 |
| miR396b_3     | 0.656895787 | gene-MA16_Dca024442 |
| miR396b_3     | 0.656895787 | gene-MA16_Dca001936 |
| miR396b_3     | 0.656895787 | gene-MA16_Dca001785 |
| miR396b_3     | 0.656895787 | gene-MA16_Dca001920 |
| miR396b_3     | 0.656895787 | gene-MA16_Dca024581 |
| miR396b_3     | 0.656895787 | gene-MA16_Dca018172 |
| miR396b_3     | 0.656895787 | gene-MA16_Dca012093 |
| miR396b_3     | 0.656895787 | gene-MA16_Dca000754 |
| miR396b_3     | 0.656895787 | gene-MA16_Dca018548 |
| miR396b_3     | 0.656895787 | gene-MA16_Dca013497 |
| miR396b_3     | 0.656895787 | gene-MA16_Dca023379 |
| miR396b_3     | 0.656895787 | gene-MA16_Dca019943 |
| miR396b_3     | 0.656895787 | gene-MA16_Dca006898 |
| miR396b_3     | 0.656895787 | gene-MA16_Dca019207 |
| miR396b_3     | 0.656895787 | gene-MA16_Dca019153 |
| miR396b_3     | 0.656895787 | gene-MA16_Dca010222 |
| miR396b_3     | 0.656895787 | gene-MA16_Dca021850 |
| miR396b_3     | 0.656895787 | gene-MA16_Dca000152 |

|           |             |                     |
|-----------|-------------|---------------------|
| miR396b_3 | 0.656895787 | gene-MA16_Dca022211 |
| miR396b_3 | 0.656895787 | gene-MA16_Dca010315 |
| miR396b_3 | 0.656895787 | gene-MA16_Dca023840 |
| miR396b_3 | 0.656895787 | gene-MA16_Dca006059 |
| miR396b_3 | 0.656895787 | gene-MA16_Dca018725 |
| miR396b_3 | 0.656895787 | gene-MA16_Dca023691 |
| miR396b_3 | 0.656895787 | gene-MA16_Dca005799 |
| miR396b_3 | 0.656895787 | gene-MA16_Dca021863 |
| miR396b_3 | 0.656895787 | gene-MA16_Dca022508 |
| miR396b_3 | 0.656895787 | gene-MA16_Dca012576 |
| miR396b_3 | 0.656895787 | gene-MA16_Dca003694 |
| miR396b_3 | 0.656895787 | gene-MA16_Dca004139 |
| miR396b_3 | 0.656895787 | gene-MA16_Dca014631 |
| miR396b_3 | 0.656895787 | gene-MA16_Dca021860 |
| miR396b_3 | 0.656895787 | gene-MA16_Dca018722 |
| miR396b_3 | 0.656895787 | gene-MA16_Dca008028 |
| miR396b_3 | 0.656895787 | gene-MA16_Dca004158 |
| miR396b_3 | 0.656895787 | gene-MA16_Dca023002 |
| miR396b_3 | 0.656895787 | gene-MA16_Dca004133 |
| miR396b_3 | 0.656895787 | gene-MA16_Dca025782 |
| miR396b_3 | 0.656895787 | gene-MA16_Dca024909 |
| miR396b_3 | 0.656895787 | gene-MA16_Dca022287 |
| miR396b_3 | 0.656895787 | gene-MA16_Dca016598 |
| miR396b_3 | 0.656895787 | gene-MA16_Dca014260 |
| miR396b_3 | 0.656895787 | gene-MA16_Dca001930 |
| miR396b_3 | 0.656895787 | gene-MA16_Dca014266 |
| miR396b_3 | 0.656895787 | gene-MA16_Dca017977 |
| miR396b_3 | 0.656895787 | gene-MA16_Dca007307 |
| miR396b_3 | 0.656895787 | gene-MA16_Dca005596 |
| miR396b_3 | 0.656895787 | gene-MA16_Dca016354 |
| miR396b_3 | 0.656895787 | gene-MA16_Dca013418 |
| miR396b_3 | 0.656895787 | gene-MA16_Dca005154 |
| miR396b_3 | 0.656895787 | gene-MA16_Dca011751 |
| miR396b_3 | 0.656895787 | gene-MA16_Dca015263 |
| miR396b_3 | 0.656895787 | gene-MA16_Dca011523 |
| miR396b_3 | 0.656895787 | gene-MA16_Dca011783 |
| miR396b_3 | 0.656895787 | gene-MA16_Dca005151 |
| miR396b_3 | 0.656895787 | gene-MA16_Dca011967 |
| miR396b_3 | 0.656895787 | gene-MA16_Dca008222 |
| miR396b_3 | 0.656895787 | gene-MA16_Dca007694 |
| miR396b_3 | 0.656895787 | gene-MA16_Dca000885 |
| miR396b_3 | 0.656895787 | gene-MA16_Dca006666 |
| miR396b_3 | 0.656895787 | gene-MA16_Dca020166 |
| miR396b_3 | 0.656895787 | gene-MA16_Dca018345 |
| miR396b_3 | 0.656895787 | gene-MA16_Dca002241 |
| miR396b_3 | 0.656895787 | gene-MA16_Dca019707 |

|           |             |                     |
|-----------|-------------|---------------------|
| miR396b_3 | 0.656895787 | gene-MA16_Dca012938 |
| miR396b_3 | 0.656895787 | gene-MA16_Dca020801 |
| miR396b_3 | 0.656895787 | gene-MA16_Dca007955 |
| miR396b_3 | 0.656895787 | gene-MA16_Dca022302 |
| miR396b_3 | 0.656895787 | gene-MA16_Dca005617 |
| miR396b_3 | 0.656895787 | gene-MA16_Dca000619 |
| miR396b_3 | 0.656895787 | gene-MA16_Dca002697 |
| miR396b_3 | 0.656895787 | gene-MA16_Dca024737 |
| miR396b_3 | 0.656895787 | gene-MA16_Dca019222 |
| miR396b_3 | 0.656895787 | gene-MA16_Dca014751 |
| miR396b_3 | 0.656895787 | gene-MA16_Dca023601 |
| miR396b_3 | 0.656895787 | gene-MA16_Dca004403 |
| miR396b_3 | 0.656895787 | gene-MA16_Dca024281 |
| miR396b_3 | 0.656895787 | gene-MA16_Dca015409 |
| miR396b_3 | 0.656895787 | gene-MA16_Dca025223 |
| miR396b_3 | 0.656895787 | gene-MA16_Dca009226 |
| miR396b_3 | 0.656895787 | gene-MA16_Dca013322 |
| miR396b_3 | 0.656895787 | gene-MA16_Dca016956 |
| miR396b_3 | 0.656895787 | gene-MA16_Dca011603 |
| miR396b_3 | 0.656895787 | gene-MA16_Dca007949 |
| miR396b_3 | 0.656895787 | gene-MA16_Dca020207 |
| miR396b_3 | 0.656895787 | gene-MA16_Dca021446 |
| miR396b_3 | 0.656895787 | gene-MA16_Dca024988 |
| miR396b_3 | 0.656895787 | gene-MA16_Dca003177 |
| miR396b_3 | 0.656895787 | gene-MA16_Dca027492 |
| miR396b_3 | 0.656895787 | gene-MA16_Dca011959 |
| miR396b_3 | 0.656895787 | gene-MA16_Dca011627 |
| miR396b_3 | 0.656895787 | gene-MA16_Dca020910 |
| miR396b_3 | 0.656895787 | gene-MA16_Dca004692 |
| miR396b_3 | 0.656895787 | gene-MA16_Dca010708 |
| miR396b_3 | 0.656895787 | gene-MA16_Dca012099 |
| miR396b_3 | 0.656895787 | gene-MA16_Dca011382 |
| miR396b_3 | 0.656895787 | gene-MA16_Dca025262 |
| miR396b_3 | 0.656895787 | gene-MA16_Dca028471 |
| miR396b_3 | 0.656895787 | gene-MA16_Dca003911 |
| miR396b_2 | 0.652023813 | gene-MA16_Dca004093 |
| miR396b_2 | 0.652023813 | gene-MA16_Dca002377 |
| miR396b_2 | 0.652023813 | gene-MA16_Dca006179 |
| miR396b_2 | 0.652023813 | gene-MA16_Dca001199 |
| miR396b_2 | 0.652023813 | gene-MA16_Dca001936 |
| miR396b_2 | 0.652023813 | gene-MA16_Dca024442 |
| miR396b_2 | 0.652023813 | gene-MA16_Dca001785 |
| miR396b_2 | 0.652023813 | gene-MA16_Dca002242 |
| miR396b_2 | 0.652023813 | gene-MA16_Dca011294 |
| miR396b_2 | 0.652023813 | gene-MA16_Dca010163 |
| miR396b_2 | 0.652023813 | gene-MA16_Dca010619 |

|           |             |                     |
|-----------|-------------|---------------------|
| miR396b_2 | 0.652023813 | gene-MA16_Dca020583 |
| miR396b_2 | 0.652023813 | gene-MA16_Dca001955 |
| miR396b_2 | 0.652023813 | gene-MA16_Dca012128 |
| miR396b_2 | 0.652023813 | gene-MA16_Dca026927 |
| miR396b_2 | 0.652023813 | gene-MA16_Dca006631 |
| miR396b_2 | 0.652023813 | gene-MA16_Dca021850 |
| miR396b_2 | 0.652023813 | gene-MA16_Dca000152 |
| miR396b_2 | 0.652023813 | gene-MA16_Dca022211 |
| miR396b_2 | 0.652023813 | gene-MA16_Dca010315 |
| miR396b_2 | 0.652023813 | gene-MA16_Dca023840 |
| miR396b_2 | 0.652023813 | gene-MA16_Dca006059 |
| miR396b_2 | 0.652023813 | gene-MA16_Dca001920 |
| miR396b_2 | 0.652023813 | gene-MA16_Dca018172 |
| miR396b_2 | 0.652023813 | gene-MA16_Dca024581 |
| miR396b_2 | 0.652023813 | gene-MA16_Dca012093 |
| miR396b_2 | 0.652023813 | gene-MA16_Dca000754 |
| miR396b_2 | 0.652023813 | gene-MA16_Dca018548 |
| miR396b_2 | 0.652023813 | gene-MA16_Dca013497 |
| miR396b_2 | 0.652023813 | gene-MA16_Dca023379 |
| miR396b_2 | 0.652023813 | gene-MA16_Dca019943 |
| miR396b_2 | 0.652023813 | gene-MA16_Dca006898 |
| miR396b_2 | 0.652023813 | gene-MA16_Dca010222 |
| miR396b_2 | 0.652023813 | gene-MA16_Dca019153 |
| miR396b_2 | 0.652023813 | gene-MA16_Dca019207 |
| miR396b_2 | 0.652023813 | gene-MA16_Dca008028 |
| miR396b_2 | 0.652023813 | gene-MA16_Dca004158 |
| miR396b_2 | 0.652023813 | gene-MA16_Dca023002 |
| miR396b_2 | 0.652023813 | gene-MA16_Dca004133 |
| miR396b_2 | 0.652023813 | gene-MA16_Dca025782 |
| miR396b_2 | 0.652023813 | gene-MA16_Dca024909 |
| miR396b_2 | 0.652023813 | gene-MA16_Dca023691 |
| miR396b_2 | 0.652023813 | gene-MA16_Dca018725 |
| miR396b_2 | 0.652023813 | gene-MA16_Dca005799 |
| miR396b_2 | 0.652023813 | gene-MA16_Dca021863 |
| miR396b_2 | 0.652023813 | gene-MA16_Dca022508 |
| miR396b_2 | 0.652023813 | gene-MA16_Dca003694 |
| miR396b_2 | 0.652023813 | gene-MA16_Dca012576 |
| miR396b_2 | 0.652023813 | gene-MA16_Dca014631 |
| miR396b_2 | 0.652023813 | gene-MA16_Dca004139 |
| miR396b_2 | 0.652023813 | gene-MA16_Dca021860 |
| miR396b_2 | 0.652023813 | gene-MA16_Dca018722 |
| miR396b_2 | 0.652023813 | gene-MA16_Dca014266 |
| miR396b_2 | 0.652023813 | gene-MA16_Dca017977 |
| miR396b_2 | 0.652023813 | gene-MA16_Dca007307 |
| miR396b_2 | 0.652023813 | gene-MA16_Dca016354 |
| miR396b_2 | 0.652023813 | gene-MA16_Dca005596 |

|           |             |                     |
|-----------|-------------|---------------------|
| miR396b_2 | 0.652023813 | gene-MA16_Dca013418 |
| miR396b_2 | 0.652023813 | gene-MA16_Dca022287 |
| miR396b_2 | 0.652023813 | gene-MA16_Dca016598 |
| miR396b_2 | 0.652023813 | gene-MA16_Dca014260 |
| miR396b_2 | 0.652023813 | gene-MA16_Dca001930 |
| miR396b_2 | 0.652023813 | gene-MA16_Dca011523 |
| miR396b_2 | 0.652023813 | gene-MA16_Dca011783 |
| miR396b_2 | 0.652023813 | gene-MA16_Dca011967 |
| miR396b_2 | 0.652023813 | gene-MA16_Dca005151 |
| miR396b_2 | 0.652023813 | gene-MA16_Dca008222 |
| miR396b_2 | 0.652023813 | gene-MA16_Dca007694 |
| miR396b_2 | 0.652023813 | gene-MA16_Dca000885 |
| miR396b_2 | 0.652023813 | gene-MA16_Dca006666 |
| miR396b_2 | 0.652023813 | gene-MA16_Dca005154 |
| miR396b_2 | 0.652023813 | gene-MA16_Dca011751 |
| miR396b_2 | 0.652023813 | gene-MA16_Dca015263 |
| miR396b_2 | 0.652023813 | gene-MA16_Dca007955 |
| miR396b_2 | 0.652023813 | gene-MA16_Dca005617 |
| miR396b_2 | 0.652023813 | gene-MA16_Dca000619 |
| miR396b_2 | 0.652023813 | gene-MA16_Dca022302 |
| miR396b_2 | 0.652023813 | gene-MA16_Dca002697 |
| miR396b_2 | 0.652023813 | gene-MA16_Dca019222 |
| miR396b_2 | 0.652023813 | gene-MA16_Dca024737 |
| miR396b_2 | 0.652023813 | gene-MA16_Dca014751 |
| miR396b_2 | 0.652023813 | gene-MA16_Dca023601 |
| miR396b_2 | 0.652023813 | gene-MA16_Dca004403 |
| miR396b_2 | 0.652023813 | gene-MA16_Dca020166 |
| miR396b_2 | 0.652023813 | gene-MA16_Dca018345 |
| miR396b_2 | 0.652023813 | gene-MA16_Dca002241 |
| miR396b_2 | 0.652023813 | gene-MA16_Dca019707 |
| miR396b_2 | 0.652023813 | gene-MA16_Dca012938 |
| miR396b_2 | 0.652023813 | gene-MA16_Dca020801 |
| miR396b_2 | 0.652023813 | gene-MA16_Dca011603 |
| miR396b_2 | 0.652023813 | gene-MA16_Dca016956 |
| miR396b_2 | 0.652023813 | gene-MA16_Dca007949 |
| miR396b_2 | 0.652023813 | gene-MA16_Dca020207 |
| miR396b_2 | 0.652023813 | gene-MA16_Dca021446 |
| miR396b_2 | 0.652023813 | gene-MA16_Dca024281 |
| miR396b_2 | 0.652023813 | gene-MA16_Dca015409 |
| miR396b_2 | 0.652023813 | gene-MA16_Dca025223 |
| miR396b_2 | 0.652023813 | gene-MA16_Dca009226 |
| miR396b_2 | 0.652023813 | gene-MA16_Dca013322 |
| miR396b_2 | 0.652023813 | gene-MA16_Dca011382 |
| miR396b_2 | 0.652023813 | gene-MA16_Dca025262 |
| miR396b_2 | 0.652023813 | gene-MA16_Dca028471 |
| miR396b_2 | 0.652023813 | gene-MA16_Dca003911 |

|               |              |                     |
|---------------|--------------|---------------------|
| miR396b_2     | 0.652023813  | gene-MA16_Dca024988 |
| miR396b_2     | 0.652023813  | gene-MA16_Dca003177 |
| miR396b_2     | 0.652023813  | gene-MA16_Dca027492 |
| miR396b_2     | 0.652023813  | gene-MA16_Dca011627 |
| miR396b_2     | 0.652023813  | gene-MA16_Dca011959 |
| miR396b_2     | 0.652023813  | gene-MA16_Dca020910 |
| miR396b_2     | 0.652023813  | gene-MA16_Dca004692 |
| miR396b_2     | 0.652023813  | gene-MA16_Dca010708 |
| miR396b_2     | 0.652023813  | gene-MA16_Dca012099 |
| novel_miR_242 | -0.699231768 | gene-MA16_Dca015938 |
| novel_miR_242 | -0.699231768 | gene-MA16_Dca002874 |
| novel_miR_242 | -0.699231768 | gene-MA16_Dca020985 |
| novel_miR_242 | -0.699231768 | gene-MA16_Dca006366 |
| novel_miR_242 | -0.699231768 | gene-MA16_Dca013024 |
| novel_miR_242 | -0.699231768 | gene-MA16_Dca023978 |
| novel_miR_242 | -0.699231768 | gene-MA16_Dca003396 |
| miR172d_1     | 0.969357365  | gene-MA16_Dca021336 |
| miR172d_1     | 0.969357365  | gene-MA16_Dca022520 |
| miR172d_1     | 0.969357365  | gene-MA16_Dca006530 |
| miR172d_1     | 0.969357365  | gene-MA16_Dca016851 |
| miR172d_1     | 0.969357365  | gene-MA16_Dca022452 |
| miR172d_1     | 0.969357365  | gene-MA16_Dca013460 |
| miR172d_1     | 0.969357365  | gene-MA16_Dca022454 |
| miR172d_1     | 0.969357365  | gene-MA16_Dca009661 |
| miR172d_1     | 0.969357365  | gene-MA16_Dca013779 |
| miR172d_1     | 0.969357365  | gene-MA16_Dca008031 |
| miR172d_1     | 0.969357365  | gene-MA16_Dca002934 |
| miR172d_1     | 0.969357365  | gene-MA16_Dca022453 |
| miR172d_1     | 0.969357365  | gene-MA16_Dca020018 |
| miR172d_1     | 0.969357365  | gene-MA16_Dca000260 |
| miR172d_1     | 0.969357365  | gene-MA16_Dca010160 |
| miR172d_1     | 0.969357365  | gene-MA16_Dca017222 |
| miR172d_1     | 0.969357365  | gene-MA16_Dca002039 |
| miR172d_1     | 0.969357365  | gene-MA16_Dca018756 |
| miR172d_1     | 0.969357365  | gene-MA16_Dca013337 |
| miR172d_1     | 0.969357365  | gene-MA16_Dca016049 |
| miR172d_1     | 0.969357365  | gene-MA16_Dca015839 |
| miR172d_1     | 0.969357365  | gene-MA16_Dca020825 |
| miR172d_1     | 0.969357365  | gene-MA16_Dca020826 |
| miR172d_1     | 0.969357365  | gene-MA16_Dca018027 |
| miR172d_1     | 0.969357365  | gene-MA16_Dca020870 |
| miR172d_1     | 0.969357365  | gene-MA16_Dca020793 |
| miR172d_1     | 0.969357365  | gene-MA16_Dca011850 |
| miR172d_1     | 0.969357365  | gene-MA16_Dca001782 |
| miR172d_1     | 0.969357365  | gene-MA16_Dca013902 |
| miR172d_1     | 0.969357365  | gene-MA16_Dca018995 |

|           |             |                     |
|-----------|-------------|---------------------|
| miR172d_1 | 0.969357365 | gene-MA16_Dca004101 |
| miR172d_1 | 0.969357365 | gene-MA16_Dca017910 |
| miR172d_1 | 0.969357365 | gene-MA16_Dca007639 |
| miR172d_1 | 0.969357365 | gene-MA16_Dca012666 |
| miR172d_1 | 0.969357365 | gene-MA16_Dca022455 |
| miR172d_2 | 0.969375799 | gene-MA16_Dca010160 |
| miR172d_2 | 0.969375799 | gene-MA16_Dca017222 |
| miR172d_2 | 0.969375799 | gene-MA16_Dca002039 |
| miR172d_2 | 0.969375799 | gene-MA16_Dca018756 |
| miR172d_2 | 0.969375799 | gene-MA16_Dca008031 |
| miR172d_2 | 0.969375799 | gene-MA16_Dca020018 |
| miR172d_2 | 0.969375799 | gene-MA16_Dca000260 |
| miR172d_2 | 0.969375799 | gene-MA16_Dca002934 |
| miR172d_2 | 0.969375799 | gene-MA16_Dca022453 |
| miR172d_2 | 0.969375799 | gene-MA16_Dca009661 |
| miR172d_2 | 0.969375799 | gene-MA16_Dca013779 |
| miR172d_2 | 0.969375799 | gene-MA16_Dca022454 |
| miR172d_2 | 0.969375799 | gene-MA16_Dca021336 |
| miR172d_2 | 0.969375799 | gene-MA16_Dca022520 |
| miR172d_2 | 0.969375799 | gene-MA16_Dca016851 |
| miR172d_2 | 0.969375799 | gene-MA16_Dca013460 |
| miR172d_2 | 0.969375799 | gene-MA16_Dca022452 |
| miR172d_2 | 0.969375799 | gene-MA16_Dca006530 |
| miR172d_2 | 0.969375799 | gene-MA16_Dca017910 |
| miR172d_2 | 0.969375799 | gene-MA16_Dca022455 |
| miR172d_2 | 0.969375799 | gene-MA16_Dca007639 |
| miR172d_2 | 0.969375799 | gene-MA16_Dca012666 |
| miR172d_2 | 0.969375799 | gene-MA16_Dca004101 |
| miR172d_2 | 0.969375799 | gene-MA16_Dca001782 |
| miR172d_2 | 0.969375799 | gene-MA16_Dca018995 |
| miR172d_2 | 0.969375799 | gene-MA16_Dca013902 |
| miR172d_2 | 0.969375799 | gene-MA16_Dca020870 |
| miR172d_2 | 0.969375799 | gene-MA16_Dca020793 |
| miR172d_2 | 0.969375799 | gene-MA16_Dca011850 |
| miR172d_2 | 0.969375799 | gene-MA16_Dca016049 |
| miR172d_2 | 0.969375799 | gene-MA16_Dca015839 |
| miR172d_2 | 0.969375799 | gene-MA16_Dca013337 |
| miR172d_2 | 0.969375799 | gene-MA16_Dca018027 |
| miR172d_2 | 0.969375799 | gene-MA16_Dca020826 |
| miR172d_2 | 0.969375799 | gene-MA16_Dca020825 |
| miR172k   | 1.219742133 | gene-MA16_Dca013337 |
| miR172k   | 1.219742133 | gene-MA16_Dca016049 |
| miR172k   | 1.219742133 | gene-MA16_Dca021336 |
| miR172k   | 1.219742133 | gene-MA16_Dca006530 |
| miR172k   | 1.219742133 | gene-MA16_Dca020825 |
| miR172k   | 1.219742133 | gene-MA16_Dca016851 |

|         |             |                     |
|---------|-------------|---------------------|
| miR172k | 1.219742133 | gene-MA16_Dca018027 |
| miR172k | 1.219742133 | gene-MA16_Dca020826 |
| miR172k | 1.219742133 | gene-MA16_Dca005551 |
| miR172k | 1.219742133 | gene-MA16_Dca012560 |
| miR172k | 1.219742133 | gene-MA16_Dca002321 |
| miR172k | 1.219742133 | gene-MA16_Dca022451 |
| miR172k | 1.219742133 | gene-MA16_Dca003098 |
| miR172k | 1.219742133 | gene-MA16_Dca022454 |
| miR172k | 1.219742133 | gene-MA16_Dca009661 |
| miR172k | 1.219742133 | gene-MA16_Dca008031 |
| miR172k | 1.219742133 | gene-MA16_Dca000603 |
| miR172k | 1.219742133 | gene-MA16_Dca018703 |
| miR172k | 1.219742133 | gene-MA16_Dca013902 |
| miR172k | 1.219742133 | gene-MA16_Dca013886 |
| miR172k | 1.219742133 | gene-MA16_Dca017910 |
| miR172k | 1.219742133 | gene-MA16_Dca022962 |
| miR172k | 1.219742133 | gene-MA16_Dca005153 |
| miR172k | 1.219742133 | gene-MA16_Dca012598 |
| miR172k | 1.219742133 | gene-MA16_Dca002039 |
| miR172k | 1.219742133 | gene-MA16_Dca010160 |
| miR172k | 1.219742133 | gene-MA16_Dca018756 |
| miR172k | 1.219742133 | gene-MA16_Dca001078 |

---

Note: FC indicate TPM value of miRNA in FR2/TPM value of miRNA in CK
