# Supplementary material for: RNA sequencing-based exploration of the effects of far-red light on microRNAs involved in the shade-avoidance response of D. officinale
Source: PeerJ journal article supplement (doi:10.7717/peerj.15001), 2023-03-20
Supplement: Table_S8.pdf [file Table_S8.pdf]

Table S8 Interaction miRNAs and mRNAs of FR8-CK

| miRNA ID   | log <sub>2</sub> FC | Targets             |
|------------|---------------------|---------------------|
| miR395m    | -3.257725112        | gene-MA16_Dca017889 |
| miR395m    | -3.257725112        | gene-MA16_Dca007732 |
| miR395m    | -3.257725112        | gene-MA16_Dca021033 |
| miR395m    | -3.257725112        | gene-MA16_Dca007646 |
| miR395m    | -3.257725112        | gene-MA16_Dca026271 |
| miR395m    | -3.257725112        | gene-MA16_Dca003297 |
| miR395m    | -3.257725112        | gene-MA16_Dca025511 |
| miR395m    | -3.257725112        | gene-MA16_Dca001411 |
| miR395m    | -3.257725112        | gene-MA16_Dca007731 |
| miR395m    | -3.257725112        | gene-MA16_Dca004386 |
| miR395m    | -3.257725112        | gene-MA16_Dca009355 |
| miR395m    | -3.257725112        | gene-MA16_Dca003285 |
| miR395m    | -3.257725112        | gene-MA16_Dca005635 |
| miR395m    | -3.257725112        | gene-MA16_Dca011968 |
| miR395b    | -3.726049807        | gene-MA16_Dca015429 |
| miR395b    | -3.726049807        | gene-MA16_Dca003297 |
| miR395b    | -3.726049807        | gene-MA16_Dca007732 |
| miR395b    | -3.726049807        | gene-MA16_Dca011968 |
| miR395b    | -3.726049807        | gene-MA16_Dca003285 |
| miR395b    | -3.726049807        | gene-MA16_Dca007731 |
| miR395b    | -3.726049807        | gene-MA16_Dca004386 |
| miR395b    | -3.726049807        | gene-MA16_Dca009355 |
| miR395b    | -3.726049807        | gene-MA16_Dca019636 |
| miR395b    | -3.726049807        | gene-MA16_Dca001411 |
| miR395b    | -3.726049807        | gene-MA16_Dca025511 |
| miR399t_3p | 3.606930859         | gene-MA16_Dca021268 |
| miR399t_3p | 3.606930859         | gene-MA16_Dca011813 |
| miR399t_3p | 3.606930859         | gene-MA16_Dca008399 |
| miR399t_3p | 3.606930859         | gene-MA16_Dca002672 |
| miR399t_3p | 3.606930859         | gene-MA16_Dca015271 |
| miR399t_3p | 3.606930859         | gene-MA16_Dca008935 |
| miR399t_3p | 3.606930859         | gene-MA16_Dca022711 |

|               |             |                     |
|---------------|-------------|---------------------|
| miR399t_3p    | 3.606930859 | gene-MA16_Dca008220 |
| miR399t_3p    | 3.606930859 | gene-MA16_Dca008496 |
| miR399t_3p    | 3.606930859 | gene-MA16_Dca021979 |
| miR399t_3p    | 3.606930859 | gene-MA16_Dca016176 |
| novel_miR_189 | -2.71785953 | gene-MA16_Dca023326 |
| novel_miR_189 | -2.71785953 | gene-MA16_Dca011459 |
| novel_miR_189 | -2.71785953 | gene-MA16_Dca010804 |
| novel_miR_189 | -2.71785953 | gene-MA16_Dca024400 |
| novel_miR_189 | -2.71785953 | gene-MA16_Dca022787 |
| novel_miR_189 | -2.71785953 | gene-MA16_Dca025882 |
| novel_miR_189 | -2.71785953 | gene-MA16_Dca015722 |
| novel_miR_189 | -2.71785953 | gene-MA16_Dca014786 |
| novel_miR_189 | -2.71785953 | gene-MA16_Dca026995 |
| novel_miR_189 | -2.71785953 | gene-MA16_Dca004836 |
| novel_miR_189 | -2.71785953 | gene-MA16_Dca001649 |
| novel_miR_189 | -2.71785953 | gene-MA16_Dca018219 |
| novel_miR_189 | -2.71785953 | gene-MA16_Dca010516 |
| novel_miR_189 | -2.71785953 | gene-MA16_Dca024704 |
| novel_miR_189 | -2.71785953 | gene-MA16_Dca024902 |
| novel_miR_189 | -2.71785953 | gene-MA16_Dca001622 |
| novel_miR_189 | -2.71785953 | gene-MA16_Dca021278 |
| novel_miR_189 | -2.71785953 | gene-MA16_Dca022838 |
| novel_miR_189 | -2.71785953 | gene-MA16_Dca022812 |
| novel_miR_189 | -2.71785953 | gene-MA16_Dca005118 |
| novel_miR_189 | -2.71785953 | gene-MA16_Dca011344 |
| novel_miR_189 | -2.71785953 | gene-MA16_Dca017709 |
| novel_miR_189 | -2.71785953 | gene-MA16_Dca018325 |
| novel_miR_189 | -2.71785953 | gene-MA16_Dca003816 |
| novel_miR_189 | -2.71785953 | gene-MA16_Dca014554 |
| novel_miR_189 | -2.71785953 | gene-MA16_Dca018212 |
| novel_miR_189 | -2.71785953 | gene-MA16_Dca010241 |
| novel_miR_189 | -2.71785953 | gene-MA16_Dca005791 |
| novel_miR_189 | -2.71785953 | gene-MA16_Dca002499 |
| novel_miR_189 | -2.71785953 | gene-MA16_Dca013892 |

|               |              |                     |
|---------------|--------------|---------------------|
| novel_miR_189 | -2.71785953  | gene-MA16_Dca000024 |
| novel_miR_189 | -2.71785953  | gene-MA16_Dca009944 |
| novel_miR_189 | -2.71785953  | gene-MA16_Dca003956 |
| novel_miR_189 | -2.71785953  | gene-MA16_Dca028126 |
| novel_miR_189 | -2.71785953  | gene-MA16_Dca024385 |
| novel_miR_189 | -2.71785953  | gene-MA16_Dca014761 |
| novel_miR_189 | -2.71785953  | gene-MA16_Dca021441 |
| novel_miR_189 | -2.71785953  | gene-MA16_Dca009034 |
| novel_miR_189 | -2.71785953  | gene-MA16_Dca003052 |
| novel_miR_189 | -2.71785953  | gene-MA16_Dca027145 |
| novel_miR_189 | -2.71785953  | gene-MA16_Dca014804 |
| novel_miR_189 | -2.71785953  | gene-MA16_Dca021649 |
| novel_miR_189 | -2.71785953  | gene-MA16_Dca010408 |
| novel_miR_189 | -2.71785953  | gene-MA16_Dca011938 |
| novel_miR_189 | -2.71785953  | gene-MA16_Dca003122 |
| novel_miR_189 | -2.71785953  | gene-MA16_Dca010402 |
| novel_miR_189 | -2.71785953  | gene-MA16_Dca016865 |
| novel_miR_189 | -2.71785953  | gene-MA16_Dca011525 |
| novel_miR_189 | -2.71785953  | gene-MA16_Dca001400 |
| novel_miR_189 | -2.71785953  | gene-MA16_Dca007799 |
| novel_miR_189 | -2.71785953  | gene-MA16_Dca010456 |
| novel_miR_189 | -2.71785953  | gene-MA16_Dca013722 |
| novel_miR_189 | -2.71785953  | gene-MA16_Dca005175 |
| novel_miR_189 | -2.71785953  | gene-MA16_Dca008000 |
| novel_miR_189 | -2.71785953  | gene-MA16_Dca013243 |
| novel_miR_189 | -2.71785953  | gene-MA16_Dca026494 |
| novel_miR_390 | -3.669012947 | gene-MA16_Dca014079 |
| novel_miR_390 | -3.669012947 | gene-MA16_Dca010045 |
| novel_miR_390 | -3.669012947 | gene-MA16_Dca016601 |
| novel_miR_390 | -3.669012947 | gene-MA16_Dca028500 |
| novel_miR_390 | -3.669012947 | gene-MA16_Dca008125 |
| novel_miR_390 | -3.669012947 | gene-MA16_Dca010799 |
| novel_miR_390 | -3.669012947 | gene-MA16_Dca028410 |
| novel_miR_390 | -3.669012947 | gene-MA16_Dca018794 |

|               |              |                     |
|---------------|--------------|---------------------|
| novel_miR_390 | -3.669012947 | gene-MA16_Dca005769 |
| novel_miR_390 | -3.669012947 | gene-MA16_Dca003585 |
| novel_miR_390 | -3.669012947 | gene-MA16_Dca021544 |
| novel_miR_390 | -3.669012947 | gene-MA16_Dca013966 |
| novel_miR_390 | -3.669012947 | gene-MA16_Dca014033 |
| novel_miR_390 | -3.669012947 | gene-MA16_Dca027734 |
| novel_miR_390 | -3.669012947 | gene-MA16_Dca014296 |
| novel_miR_390 | -3.669012947 | gene-MA16_Dca024277 |
| novel_miR_390 | -3.669012947 | gene-MA16_Dca011847 |
| novel_miR_390 | -3.669012947 | gene-MA16_Dca013703 |
| novel_miR_390 | -3.669012947 | gene-MA16_Dca014007 |
| novel_miR_390 | -3.669012947 | gene-MA16_Dca014915 |
| novel_miR_390 | -3.669012947 | gene-MA16_Dca004540 |
| novel_miR_390 | -3.669012947 | gene-MA16_Dca011199 |
| novel_miR_390 | -3.669012947 | gene-MA16_Dca022649 |
| novel_miR_390 | -3.669012947 | gene-MA16_Dca018160 |
| novel_miR_390 | -3.669012947 | gene-MA16_Dca002338 |
| novel_miR_390 | -3.669012947 | gene-MA16_Dca015057 |
| novel_miR_390 | -3.669012947 | gene-MA16_Dca016490 |
| novel_miR_390 | -3.669012947 | gene-MA16_Dca025504 |
| novel_miR_390 | -3.669012947 | gene-MA16_Dca016699 |
| novel_miR_390 | -3.669012947 | gene-MA16_Dca014673 |
| novel_miR_390 | -3.669012947 | gene-MA16_Dca022905 |
| novel_miR_390 | -3.669012947 | gene-MA16_Dca015359 |
| novel_miR_390 | -3.669012947 | gene-MA16_Dca011253 |
| novel_miR_390 | -3.669012947 | gene-MA16_Dca014237 |
| novel_miR_390 | -3.669012947 | gene-MA16_Dca021241 |
| novel_miR_390 | -3.669012947 | gene-MA16_Dca000483 |
| novel_miR_390 | -3.669012947 | gene-MA16_Dca009990 |
| novel_miR_390 | -3.669012947 | gene-MA16_Dca005346 |
| novel_miR_390 | -3.669012947 | gene-MA16_Dca022795 |
| novel_miR_390 | -3.669012947 | gene-MA16_Dca008661 |
| novel_miR_390 | -3.669012947 | gene-MA16_Dca017160 |
| novel_miR_390 | -3.669012947 | gene-MA16_Dca022638 |

|               |              |                     |
|---------------|--------------|---------------------|
| novel_miR_390 | -3.669012947 | gene-MA16_Dca013961 |
| novel_miR_390 | -3.669012947 | gene-MA16_Dca010093 |
| novel_miR_390 | -3.669012947 | gene-MA16_Dca002089 |
| novel_miR_390 | -3.669012947 | gene-MA16_Dca021165 |
| novel_miR_390 | -3.669012947 | gene-MA16_Dca004503 |
| novel_miR_390 | -3.669012947 | gene-MA16_Dca007957 |
| novel_miR_390 | -3.669012947 | gene-MA16_Dca020534 |
| novel_miR_390 | -3.669012947 | gene-MA16_Dca004340 |
| novel_miR_390 | -3.669012947 | gene-MA16_Dca017598 |
| novel_miR_390 | -3.669012947 | gene-MA16_Dca012435 |
| novel_miR_390 | -3.669012947 | gene-MA16_Dca007417 |
| novel_miR_390 | -3.669012947 | gene-MA16_Dca010932 |
| novel_miR_390 | -3.669012947 | gene-MA16_Dca023407 |
| novel_miR_390 | -3.669012947 | gene-MA16_Dca002781 |
| novel_miR_390 | -3.669012947 | gene-MA16_Dca008350 |
| novel_miR_390 | -3.669012947 | gene-MA16_Dca002133 |
| novel_miR_390 | -3.669012947 | gene-MA16_Dca015811 |
| novel_miR_390 | -3.669012947 | gene-MA16_Dca023276 |
| novel_miR_262 | -3.668771987 | gene-MA16_Dca023276 |
| novel_miR_262 | -3.668771987 | gene-MA16_Dca015811 |
| novel_miR_262 | -3.668771987 | gene-MA16_Dca002133 |
| novel_miR_262 | -3.668771987 | gene-MA16_Dca002781 |
| novel_miR_262 | -3.668771987 | gene-MA16_Dca008350 |
| novel_miR_262 | -3.668771987 | gene-MA16_Dca007417 |
| novel_miR_262 | -3.668771987 | gene-MA16_Dca010932 |
| novel_miR_262 | -3.668771987 | gene-MA16_Dca023407 |
| novel_miR_262 | -3.668771987 | gene-MA16_Dca012435 |
| novel_miR_262 | -3.668771987 | gene-MA16_Dca017598 |
| novel_miR_262 | -3.668771987 | gene-MA16_Dca004340 |
| novel_miR_262 | -3.668771987 | gene-MA16_Dca020534 |
| novel_miR_262 | -3.668771987 | gene-MA16_Dca007957 |
| novel_miR_262 | -3.668771987 | gene-MA16_Dca004503 |
| novel_miR_262 | -3.668771987 | gene-MA16_Dca021165 |
| novel_miR_262 | -3.668771987 | gene-MA16_Dca002089 |

|               |              |                     |
|---------------|--------------|---------------------|
| novel_miR_262 | -3.668771987 | gene-MA16_Dca010093 |
| novel_miR_262 | -3.668771987 | gene-MA16_Dca013961 |
| novel_miR_262 | -3.668771987 | gene-MA16_Dca022638 |
| novel_miR_262 | -3.668771987 | gene-MA16_Dca017160 |
| novel_miR_262 | -3.668771987 | gene-MA16_Dca008661 |
| novel_miR_262 | -3.668771987 | gene-MA16_Dca022795 |
| novel_miR_262 | -3.668771987 | gene-MA16_Dca005346 |
| novel_miR_262 | -3.668771987 | gene-MA16_Dca009990 |
| novel_miR_262 | -3.668771987 | gene-MA16_Dca000483 |
| novel_miR_262 | -3.668771987 | gene-MA16_Dca021241 |
| novel_miR_262 | -3.668771987 | gene-MA16_Dca014237 |
| novel_miR_262 | -3.668771987 | gene-MA16_Dca011253 |
| novel_miR_262 | -3.668771987 | gene-MA16_Dca015359 |
| novel_miR_262 | -3.668771987 | gene-MA16_Dca022905 |
| novel_miR_262 | -3.668771987 | gene-MA16_Dca014673 |
| novel_miR_262 | -3.668771987 | gene-MA16_Dca016699 |
| novel_miR_262 | -3.668771987 | gene-MA16_Dca025504 |
| novel_miR_262 | -3.668771987 | gene-MA16_Dca016490 |
| novel_miR_262 | -3.668771987 | gene-MA16_Dca015057 |
| novel_miR_262 | -3.668771987 | gene-MA16_Dca002338 |
| novel_miR_262 | -3.668771987 | gene-MA16_Dca018160 |
| novel_miR_262 | -3.668771987 | gene-MA16_Dca011199 |
| novel_miR_262 | -3.668771987 | gene-MA16_Dca004540 |
| novel_miR_262 | -3.668771987 | gene-MA16_Dca022649 |
| novel_miR_262 | -3.668771987 | gene-MA16_Dca014007 |
| novel_miR_262 | -3.668771987 | gene-MA16_Dca014915 |
| novel_miR_262 | -3.668771987 | gene-MA16_Dca011847 |
| novel_miR_262 | -3.668771987 | gene-MA16_Dca013703 |
| novel_miR_262 | -3.668771987 | gene-MA16_Dca024277 |
| novel_miR_262 | -3.668771987 | gene-MA16_Dca027734 |
| novel_miR_262 | -3.668771987 | gene-MA16_Dca014296 |
| novel_miR_262 | -3.668771987 | gene-MA16_Dca014033 |
| novel_miR_262 | -3.668771987 | gene-MA16_Dca013966 |
| novel_miR_262 | -3.668771987 | gene-MA16_Dca003585 |

|               |              |                     |
|---------------|--------------|---------------------|
| novel_miR_262 | -3.668771987 | gene-MA16_Dca021544 |
| novel_miR_262 | -3.668771987 | gene-MA16_Dca005769 |
| novel_miR_262 | -3.668771987 | gene-MA16_Dca018794 |
| novel_miR_262 | -3.668771987 | gene-MA16_Dca028410 |
| novel_miR_262 | -3.668771987 | gene-MA16_Dca010799 |
| novel_miR_262 | -3.668771987 | gene-MA16_Dca028500 |
| novel_miR_262 | -3.668771987 | gene-MA16_Dca008125 |
| novel_miR_262 | -3.668771987 | gene-MA16_Dca016601 |
| novel_miR_262 | -3.668771987 | gene-MA16_Dca010045 |
| novel_miR_262 | -3.668771987 | gene-MA16_Dca014079 |
| miR399b_2     | 2.072480945  | gene-MA16_Dca001351 |
| miR399b_2     | 2.072480945  | gene-MA16_Dca003017 |
| miR399b_2     | 2.072480945  | gene-MA16_Dca018409 |
| novel_miR_264 | 1.037907144  | gene-MA16_Dca017476 |
| novel_miR_264 | 1.037907144  | gene-MA16_Dca018659 |
| novel_miR_264 | 1.037907144  | gene-MA16_Dca019290 |
| novel_miR_264 | 1.037907144  | gene-MA16_Dca015518 |
| miR827        | 2.205017066  | gene-MA16_Dca021565 |
| miR827        | 2.205017066  | gene-MA16_Dca024417 |
| miR827        | 2.205017066  | gene-MA16_Dca002484 |
| miR827        | 2.205017066  | gene-MA16_Dca008822 |
| miR827        | 2.205017066  | gene-MA16_Dca024114 |
| miR827        | 2.205017066  | gene-MA16_Dca022005 |
| miR399c_5p    | 1.954215127  | gene-MA16_Dca002003 |
| miR399c_5p    | 1.954215127  | gene-MA16_Dca019401 |
| miR399c_5p    | 1.954215127  | gene-MA16_Dca023610 |
| miR399c_5p    | 1.954215127  | gene-MA16_Dca006616 |
| miR399c_5p    | 1.954215127  | gene-MA16_Dca023997 |
| miR399c_5p    | 1.954215127  | gene-MA16_Dca025118 |
| miR399c_5p    | 1.954215127  | gene-MA16_Dca005971 |
| miR399c_5p    | 1.954215127  | gene-MA16_Dca027017 |
| miR399c_5p    | 1.954215127  | gene-MA16_Dca022511 |
| miR399c_5p    | 1.954215127  | gene-MA16_Dca021261 |
| miR399c_5p    | 1.954215127  | gene-MA16_Dca016271 |

|               |             |                     |
|---------------|-------------|---------------------|
| miR399c_5p    | 1.954215127 | gene-MA16_Dca000468 |
| miR399c_5p    | 1.954215127 | gene-MA16_Dca006711 |
| miR399c_5p    | 1.954215127 | gene-MA16_Dca025768 |
| miR399c_5p    | 1.954215127 | gene-MA16_Dca020196 |
| miR399c_5p    | 1.954215127 | gene-MA16_Dca005699 |
| miR399c_5p    | 1.954215127 | gene-MA16_Dca019405 |
| miR399c_5p    | 1.954215127 | gene-MA16_Dca007810 |
| miR399c_5p    | 1.954215127 | gene-MA16_Dca010441 |
| miR399c_5p    | 1.954215127 | gene-MA16_Dca024450 |
| miR399c_5p    | 1.954215127 | gene-MA16_Dca026041 |
| miR399c_5p    | 1.954215127 | gene-MA16_Dca016402 |
| miR399c_5p    | 1.954215127 | gene-MA16_Dca015690 |
| miR399c_5p    | 1.954215127 | gene-MA16_Dca028386 |
| miR399c_5p    | 1.954215127 | gene-MA16_Dca000976 |
| miR399c_5p    | 1.954215127 | gene-MA16_Dca004695 |
| miR399c_5p    | 1.954215127 | gene-MA16_Dca003355 |
| miR399c_5p    | 1.954215127 | gene-MA16_Dca018337 |
| miR399c_5p    | 1.954215127 | gene-MA16_Dca001276 |
| miR399c_5p    | 1.954215127 | gene-MA16_Dca018325 |
| miR399c_5p    | 1.954215127 | gene-MA16_Dca018237 |
| miR399c_5p    | 1.954215127 | gene-MA16_Dca001986 |
| miR399c_5p    | 1.954215127 | gene-MA16_Dca025044 |
| miR399c_5p    | 1.954215127 | gene-MA16_Dca002055 |
| miR399c_5p    | 1.954215127 | gene-MA16_Dca006221 |
| miR399c_5p    | 1.954215127 | gene-MA16_Dca011500 |
| miR399c_5p    | 1.954215127 | gene-MA16_Dca012031 |
| miR399c_5p    | 1.954215127 | gene-MA16_Dca022465 |
| miR399c_5p    | 1.954215127 | gene-MA16_Dca009831 |
| miR399c_5p    | 1.954215127 | gene-MA16_Dca026145 |
| miR399c_5p    | 1.954215127 | gene-MA16_Dca021763 |
| novel_miR_483 | 1.363671654 | gene-MA16_Dca001585 |
| novel_miR_483 | 1.363671654 | gene-MA16_Dca008798 |
| novel_miR_483 | 1.363671654 | gene-MA16_Dca011586 |
| novel_miR_483 | 1.363671654 | gene-MA16_Dca008229 |



|               |              |                     |
|---------------|--------------|---------------------|
| novel_miR_483 | 1.363671654  | gene-MA16_Dca001748 |
| novel_miR_483 | 1.363671654  | gene-MA16_Dca004547 |
| novel_miR_483 | 1.363671654  | gene-MA16_Dca024638 |
| novel_miR_483 | 1.363671654  | gene-MA16_Dca008180 |
| novel_miR_483 | 1.363671654  | gene-MA16_Dca012903 |
| novel_miR_483 | 1.363671654  | gene-MA16_Dca023073 |
| novel_miR_483 | 1.363671654  | gene-MA16_Dca001413 |
| novel_miR_483 | 1.363671654  | gene-MA16_Dca003302 |
| novel_miR_483 | 1.363671654  | gene-MA16_Dca014470 |
| novel_miR_483 | 1.363671654  | gene-MA16_Dca002554 |
| novel_miR_483 | 1.363671654  | gene-MA16_Dca021949 |
| novel_miR_483 | 1.363671654  | gene-MA16_Dca000383 |
| novel_miR_483 | 1.363671654  | gene-MA16_Dca017330 |
| novel_miR_483 | 1.363671654  | gene-MA16_Dca019516 |
| novel_miR_483 | 1.363671654  | gene-MA16_Dca014566 |
| novel_miR_483 | 1.363671654  | gene-MA16_Dca021950 |
| novel_miR_483 | 1.363671654  | gene-MA16_Dca023983 |
| novel_miR_483 | 1.363671654  | gene-MA16_Dca022074 |
| novel_miR_483 | 1.363671654  | gene-MA16_Dca012104 |
| novel_miR_483 | 1.363671654  | gene-MA16_Dca011997 |
| novel_miR_483 | 1.363671654  | gene-MA16_Dca013128 |
| novel_miR_483 | 1.363671654  | gene-MA16_Dca010674 |
| novel_miR_483 | 1.363671654  | gene-MA16_Dca007315 |
| novel_miR_483 | 1.363671654  | gene-MA16_Dca015910 |
| novel_miR_484 | -2.721668558 | gene-MA16_Dca013703 |
| novel_miR_484 | -2.721668558 | gene-MA16_Dca011847 |
| novel_miR_484 | -2.721668558 | gene-MA16_Dca028665 |
| novel_miR_484 | -2.721668558 | gene-MA16_Dca022384 |
| novel_miR_484 | -2.721668558 | gene-MA16_Dca018928 |
| novel_miR_484 | -2.721668558 | gene-MA16_Dca013338 |
| novel_miR_484 | -2.721668558 | gene-MA16_Dca009144 |
| novel_miR_484 | -2.721668558 | gene-MA16_Dca015180 |
| novel_miR_484 | -2.721668558 | gene-MA16_Dca027734 |
| novel_miR_484 | -2.721668558 | gene-MA16_Dca019875 |

|               |              |                     |
|---------------|--------------|---------------------|
| novel_miR_484 | -2.721668558 | gene-MA16_Dca016458 |
| novel_miR_484 | -2.721668558 | gene-MA16_Dca016490 |
| novel_miR_484 | -2.721668558 | gene-MA16_Dca019561 |
| novel_miR_484 | -2.721668558 | gene-MA16_Dca006494 |
| novel_miR_484 | -2.721668558 | gene-MA16_Dca015083 |
| novel_miR_484 | -2.721668558 | gene-MA16_Dca011199 |
| novel_miR_484 | -2.721668558 | gene-MA16_Dca022649 |
| novel_miR_484 | -2.721668558 | gene-MA16_Dca014915 |
| novel_miR_484 | -2.721668558 | gene-MA16_Dca010212 |
| novel_miR_484 | -2.721668558 | gene-MA16_Dca008125 |
| novel_miR_484 | -2.721668558 | gene-MA16_Dca017780 |
| novel_miR_484 | -2.721668558 | gene-MA16_Dca019194 |
| novel_miR_484 | -2.721668558 | gene-MA16_Dca008674 |
| novel_miR_484 | -2.721668558 | gene-MA16_Dca016409 |
| novel_miR_484 | -2.721668558 | gene-MA16_Dca017451 |
| novel_miR_484 | -2.721668558 | gene-MA16_Dca021955 |
| novel_miR_484 | -2.721668558 | gene-MA16_Dca021243 |
| novel_miR_484 | -2.721668558 | gene-MA16_Dca027391 |
| novel_miR_484 | -2.721668558 | gene-MA16_Dca018115 |
| novel_miR_484 | -2.721668558 | gene-MA16_Dca000965 |
| novel_miR_484 | -2.721668558 | gene-MA16_Dca006776 |
| novel_miR_484 | -2.721668558 | gene-MA16_Dca007667 |
| novel_miR_484 | -2.721668558 | gene-MA16_Dca003224 |
| novel_miR_484 | -2.721668558 | gene-MA16_Dca004503 |
| novel_miR_484 | -2.721668558 | gene-MA16_Dca023412 |
| novel_miR_484 | -2.721668558 | gene-MA16_Dca012030 |
| novel_miR_484 | -2.721668558 | gene-MA16_Dca020389 |
| novel_miR_484 | -2.721668558 | gene-MA16_Dca028340 |
| novel_miR_484 | -2.721668558 | gene-MA16_Dca002133 |
| novel_miR_484 | -2.721668558 | gene-MA16_Dca007417 |
| novel_miR_484 | -2.721668558 | gene-MA16_Dca012435 |
| novel_miR_484 | -2.721668558 | gene-MA16_Dca015045 |
| novel_miR_484 | -2.721668558 | gene-MA16_Dca019567 |
| novel_miR_484 | -2.721668558 | gene-MA16_Dca001581 |

|               |              |                     |
|---------------|--------------|---------------------|
| novel_miR_484 | -2.721668558 | gene-MA16_Dca022185 |
| novel_miR_484 | -2.721668558 | gene-MA16_Dca009281 |
| novel_miR_484 | -2.721668558 | gene-MA16_Dca028824 |
| novel_miR_484 | -2.721668558 | gene-MA16_Dca011516 |
| novel_miR_484 | -2.721668558 | gene-MA16_Dca011253 |
| novel_miR_484 | -2.721668558 | gene-MA16_Dca015359 |
| novel_miR_484 | -2.721668558 | gene-MA16_Dca002926 |
| novel_miR_484 | -2.721668558 | gene-MA16_Dca005762 |
| novel_miR_484 | -2.721668558 | gene-MA16_Dca017160 |
| novel_miR_484 | -2.721668558 | gene-MA16_Dca022638 |
| novel_miR_484 | -2.721668558 | gene-MA16_Dca015933 |
| novel_miR_484 | -2.721668558 | gene-MA16_Dca016882 |
| novel_miR_484 | -2.721668558 | gene-MA16_Dca025576 |
| novel_miR_484 | -2.721668558 | gene-MA16_Dca008661 |
| novel_miR_484 | -2.721668558 | gene-MA16_Dca010144 |
| novel_miR_484 | -2.721668558 | gene-MA16_Dca008955 |
| novel_miR_484 | -2.721668558 | gene-MA16_Dca013055 |
| novel_miR_484 | -2.721668558 | gene-MA16_Dca016304 |
| novel_miR_484 | -2.721668558 | gene-MA16_Dca024277 |
| novel_miR_484 | -2.721668558 | gene-MA16_Dca019975 |
| novel_miR_484 | -2.721668558 | gene-MA16_Dca003651 |
| novel_miR_484 | -2.721668558 | gene-MA16_Dca017446 |
| novel_miR_484 | -2.721668558 | gene-MA16_Dca013631 |
| novel_miR_484 | -2.721668558 | gene-MA16_Dca000685 |
| novel_miR_484 | -2.721668558 | gene-MA16_Dca014673 |
| novel_miR_484 | -2.721668558 | gene-MA16_Dca018194 |
| novel_miR_484 | -2.721668558 | gene-MA16_Dca006033 |
| novel_miR_484 | -2.721668558 | gene-MA16_Dca001538 |
| novel_miR_484 | -2.721668558 | gene-MA16_Dca026681 |
| novel_miR_484 | -2.721668558 | gene-MA16_Dca025504 |
| novel_miR_484 | -2.721668558 | gene-MA16_Dca006006 |
| novel_miR_484 | -2.721668558 | gene-MA16_Dca019891 |
| novel_miR_484 | -2.721668558 | gene-MA16_Dca020179 |
| novel_miR_484 | -2.721668558 | gene-MA16_Dca015057 |

|               |              |                     |
|---------------|--------------|---------------------|
| novel_miR_484 | -2.721668558 | gene-MA16_Dca012781 |
| novel_miR_484 | -2.721668558 | gene-MA16_Dca004540 |
| novel_miR_484 | -2.721668558 | gene-MA16_Dca018330 |
| novel_miR_484 | -2.721668558 | gene-MA16_Dca001333 |
| novel_miR_484 | -2.721668558 | gene-MA16_Dca014007 |
| novel_miR_484 | -2.721668558 | gene-MA16_Dca028410 |
| novel_miR_484 | -2.721668558 | gene-MA16_Dca028352 |
| novel_miR_484 | -2.721668558 | gene-MA16_Dca010058 |
| novel_miR_484 | -2.721668558 | gene-MA16_Dca000100 |
| novel_miR_484 | -2.721668558 | gene-MA16_Dca021773 |
| novel_miR_484 | -2.721668558 | gene-MA16_Dca001992 |
| novel_miR_484 | -2.721668558 | gene-MA16_Dca008877 |
| novel_miR_484 | -2.721668558 | gene-MA16_Dca028562 |
| novel_miR_484 | -2.721668558 | gene-MA16_Dca021141 |
| novel_miR_484 | -2.721668558 | gene-MA16_Dca024139 |
| novel_miR_484 | -2.721668558 | gene-MA16_Dca005319 |
| novel_miR_484 | -2.721668558 | gene-MA16_Dca011443 |
| novel_miR_484 | -2.721668558 | gene-MA16_Dca022957 |
| novel_miR_484 | -2.721668558 | gene-MA16_Dca014398 |
| novel_miR_484 | -2.721668558 | gene-MA16_Dca003585 |
| novel_miR_484 | -2.721668558 | gene-MA16_Dca008889 |
| novel_miR_484 | -2.721668558 | gene-MA16_Dca026047 |
| novel_miR_484 | -2.721668558 | gene-MA16_Dca019039 |
| novel_miR_484 | -2.721668558 | gene-MA16_Dca012296 |
| novel_miR_484 | -2.721668558 | gene-MA16_Dca011298 |
| novel_miR_484 | -2.721668558 | gene-MA16_Dca023407 |
| novel_miR_484 | -2.721668558 | gene-MA16_Dca017598 |
| novel_miR_484 | -2.721668558 | gene-MA16_Dca023855 |
| novel_miR_484 | -2.721668558 | gene-MA16_Dca004340 |
| novel_miR_484 | -2.721668558 | gene-MA16_Dca007240 |
| novel_miR_484 | -2.721668558 | gene-MA16_Dca005346 |
| novel_miR_484 | -2.721668558 | gene-MA16_Dca009990 |
| novel_miR_484 | -2.721668558 | gene-MA16_Dca014237 |
| novel_miR_484 | -2.721668558 | gene-MA16_Dca024325 |

|               |              |                     |
|---------------|--------------|---------------------|
| novel_miR_484 | -2.721668558 | gene-MA16_Dca022905 |
| novel_miR_484 | -2.721668558 | gene-MA16_Dca019790 |
| novel_miR_484 | -2.721668558 | gene-MA16_Dca010093 |
| novel_miR_484 | -2.721668558 | gene-MA16_Dca015921 |
| novel_miR_484 | -2.721668558 | gene-MA16_Dca017338 |
| novel_miR_484 | -2.721668558 | gene-MA16_Dca027164 |
| novel_miR_484 | -2.721668558 | gene-MA16_Dca022795 |
| novel_miR_484 | -2.721668558 | gene-MA16_Dca012251 |
| novel_miR_244 | 1.601838276  | gene-MA16_Dca025956 |
| novel_miR_71  | 1.602882269  | gene-MA16_Dca025956 |
| miR399e_5p_2  | 0.923894241  | gene-MA16_Dca007637 |
| novel_miR_45  | 1.461548561  | gene-MA16_Dca005043 |
| novel_miR_45  | 1.461548561  | gene-MA16_Dca019234 |
| novel_miR_45  | 1.461548561  | gene-MA16_Dca024771 |
| novel_miR_45  | 1.461548561  | gene-MA16_Dca009889 |
| novel_miR_45  | 1.461548561  | gene-MA16_Dca007090 |
| novel_miR_45  | 1.461548561  | gene-MA16_Dca003489 |
| novel_miR_45  | 1.461548561  | gene-MA16_Dca008938 |
| novel_miR_45  | 1.461548561  | gene-MA16_Dca011854 |
| novel_miR_45  | 1.461548561  | gene-MA16_Dca012991 |
| novel_miR_45  | 1.461548561  | gene-MA16_Dca025486 |
| novel_miR_45  | 1.461548561  | gene-MA16_Dca001590 |
| novel_miR_45  | 1.461548561  | gene-MA16_Dca012774 |
| novel_miR_45  | 1.461548561  | gene-MA16_Dca010838 |
| novel_miR_45  | 1.461548561  | gene-MA16_Dca008335 |
| novel_miR_384 | 0.809933153  | gene-MA16_Dca022279 |
| novel_miR_384 | 0.809933153  | gene-MA16_Dca013574 |
| novel_miR_192 | 0.790235609  | gene-MA16_Dca010818 |
| novel_miR_192 | 0.790235609  | gene-MA16_Dca005939 |
| novel_miR_453 | 0.761802771  | gene-MA16_Dca002332 |
| novel_miR_453 | 0.761802771  | gene-MA16_Dca015927 |
| novel_miR_453 | 0.761802771  | gene-MA16_Dca020219 |
| novel_miR_453 | 0.761802771  | gene-MA16_Dca014772 |
| novel_miR_453 | 0.761802771  | gene-MA16_Dca008206 |

|               |              |                     |
|---------------|--------------|---------------------|
| novel_miR_159 | -0.831925691 | gene-MA16_Dca013669 |
| novel_miR_159 | -0.831925691 | gene-MA16_Dca015045 |
| novel_miR_159 | -0.831925691 | gene-MA16_Dca016284 |
| novel_miR_159 | -0.831925691 | gene-MA16_Dca018922 |
| novel_miR_159 | -0.831925691 | gene-MA16_Dca007765 |
| novel_miR_159 | -0.831925691 | gene-MA16_Dca007257 |
| novel_miR_159 | -0.831925691 | gene-MA16_Dca026264 |
| novel_miR_159 | -0.831925691 | gene-MA16_Dca020115 |
| novel_miR_159 | -0.831925691 | gene-MA16_Dca001020 |
| novel_miR_159 | -0.831925691 | gene-MA16_Dca001828 |
| novel_miR_159 | -0.831925691 | gene-MA16_Dca016652 |
| novel_miR_159 | -0.831925691 | gene-MA16_Dca027076 |
| novel_miR_159 | -0.831925691 | gene-MA16_Dca013843 |
| novel_miR_159 | -0.831925691 | gene-MA16_Dca008856 |
| novel_miR_159 | -0.831925691 | gene-MA16_Dca006592 |
| novel_miR_159 | -0.831925691 | gene-MA16_Dca021824 |
| novel_miR_159 | -0.831925691 | gene-MA16_Dca006324 |
| novel_miR_159 | -0.831925691 | gene-MA16_Dca014974 |
| novel_miR_159 | -0.831925691 | gene-MA16_Dca022392 |
| novel_miR_159 | -0.831925691 | gene-MA16_Dca010817 |
| novel_miR_159 | -0.831925691 | gene-MA16_Dca007613 |
| novel_miR_159 | -0.831925691 | gene-MA16_Dca017065 |
| novel_miR_159 | -0.831925691 | gene-MA16_Dca007050 |
| novel_miR_159 | -0.831925691 | gene-MA16_Dca005372 |
| novel_miR_159 | -0.831925691 | gene-MA16_Dca022401 |
| novel_miR_159 | -0.831925691 | gene-MA16_Dca007408 |
| novel_miR_159 | -0.831925691 | gene-MA16_Dca016389 |
| novel_miR_159 | -0.831925691 | gene-MA16_Dca016013 |
| novel_miR_159 | -0.831925691 | gene-MA16_Dca012490 |
| novel_miR_159 | -0.831925691 | gene-MA16_Dca021414 |
| novel_miR_159 | -0.831925691 | gene-MA16_Dca011522 |
| novel_miR_159 | -0.831925691 | gene-MA16_Dca015083 |
| novel_miR_159 | -0.831925691 | gene-MA16_Dca006829 |
| novel_miR_159 | -0.831925691 | gene-MA16_Dca014007 |

|               |              |                     |
|---------------|--------------|---------------------|
| novel_miR_159 | -0.831925691 | gene-MA16_Dca006179 |
| novel_miR_159 | -0.831925691 | gene-MA16_Dca019278 |
| novel_miR_159 | -0.831925691 | gene-MA16_Dca001444 |
| novel_miR_159 | -0.831925691 | gene-MA16_Dca014143 |
| novel_miR_159 | -0.831925691 | gene-MA16_Dca019818 |
| novel_miR_159 | -0.831925691 | gene-MA16_Dca015975 |
| novel_miR_159 | -0.831925691 | gene-MA16_Dca006828 |
| novel_miR_159 | -0.831925691 | gene-MA16_Dca023636 |
| novel_miR_159 | -0.831925691 | gene-MA16_Dca027407 |
| novel_miR_159 | -0.831925691 | gene-MA16_Dca002029 |
| novel_miR_159 | -0.831925691 | gene-MA16_Dca001924 |
| novel_miR_159 | -0.831925691 | gene-MA16_Dca022572 |
| novel_miR_159 | -0.831925691 | gene-MA16_Dca010252 |
| novel_miR_159 | -0.831925691 | gene-MA16_Dca023553 |
| novel_miR_159 | -0.831925691 | gene-MA16_Dca005107 |
| novel_miR_159 | -0.831925691 | gene-MA16_Dca024023 |
| novel_miR_159 | -0.831925691 | gene-MA16_Dca024366 |
| novel_miR_159 | -0.831925691 | gene-MA16_Dca002789 |
| novel_miR_159 | -0.831925691 | gene-MA16_Dca019273 |
| novel_miR_159 | -0.831925691 | gene-MA16_Dca011278 |
| novel_miR_159 | -0.831925691 | gene-MA16_Dca018789 |
| novel_miR_159 | -0.831925691 | gene-MA16_Dca018071 |
| novel_miR_159 | -0.831925691 | gene-MA16_Dca021047 |
| novel_miR_159 | -0.831925691 | gene-MA16_Dca003342 |
| novel_miR_159 | -0.831925691 | gene-MA16_Dca005616 |
| novel_miR_159 | -0.831925691 | gene-MA16_Dca025367 |
| novel_miR_159 | -0.831925691 | gene-MA16_Dca028626 |
| novel_miR_159 | -0.831925691 | gene-MA16_Dca012922 |
| miR530a       | 0.940135919  | gene-MA16_Dca022268 |
| miR530a       | 0.940135919  | gene-MA16_Dca019882 |
| miR530a       | 0.940135919  | gene-MA16_Dca013836 |
| miR530a       | 0.940135919  | gene-MA16_Dca011594 |
| miR530a       | 0.940135919  | gene-MA16_Dca010385 |
| novel_miR_242 | -1.030598853 | gene-MA16_Dca015938 |

|               |              |                     |
|---------------|--------------|---------------------|
| novel_miR_242 | -1.030598853 | gene-MA16_Dca002874 |
| novel_miR_242 | -1.030598853 | gene-MA16_Dca020985 |
| novel_miR_242 | -1.030598853 | gene-MA16_Dca006366 |
| novel_miR_242 | -1.030598853 | gene-MA16_Dca013024 |
| novel_miR_242 | -1.030598853 | gene-MA16_Dca023978 |
| novel_miR_242 | -1.030598853 | gene-MA16_Dca003396 |
| novel_miR_407 | 0.679898141  | gene-MA16_Dca007135 |
| miR812o_5p_2  | -1.01136364  | gene-MA16_Dca015731 |
| miR812o_5p_1  | -1.011363902 | gene-MA16_Dca015731 |
| novel_miR_53  | -1.956372727 | gene-MA16_Dca005089 |
| novel_miR_53  | -1.956372727 | gene-MA16_Dca020713 |
| novel_miR_53  | -1.956372727 | gene-MA16_Dca022778 |
| novel_miR_53  | -1.956372727 | gene-MA16_Dca001003 |
| novel_miR_53  | -1.956372727 | gene-MA16_Dca007171 |
| novel_miR_53  | -1.956372727 | gene-MA16_Dca014115 |
| novel_miR_53  | -1.956372727 | gene-MA16_Dca000122 |
| novel_miR_53  | -1.956372727 | gene-MA16_Dca012806 |
| novel_miR_53  | -1.956372727 | gene-MA16_Dca003261 |
| novel_miR_53  | -1.956372727 | gene-MA16_Dca000505 |
| novel_miR_53  | -1.956372727 | gene-MA16_Dca009084 |
| novel_miR_53  | -1.956372727 | gene-MA16_Dca012781 |
| novel_miR_53  | -1.956372727 | gene-MA16_Dca010665 |
| novel_miR_53  | -1.956372727 | gene-MA16_Dca018178 |
| novel_miR_53  | -1.956372727 | gene-MA16_Dca011106 |
| novel_miR_53  | -1.956372727 | gene-MA16_Dca023559 |
| novel_miR_53  | -1.956372727 | gene-MA16_Dca017541 |
| novel_miR_53  | -1.956372727 | gene-MA16_Dca002207 |
| novel_miR_53  | -1.956372727 | gene-MA16_Dca017663 |
| novel_miR_53  | -1.956372727 | gene-MA16_Dca017043 |
| novel_miR_53  | -1.956372727 | gene-MA16_Dca010639 |
| novel_miR_53  | -1.956372727 | gene-MA16_Dca000121 |
| novel_miR_53  | -1.956372727 | gene-MA16_Dca023432 |
| novel_miR_53  | -1.956372727 | gene-MA16_Dca015909 |
| novel_miR_53  | -1.956372727 | gene-MA16_Dca002218 |



|               |              |                     |
|---------------|--------------|---------------------|
| novel_miR_53  | -1.956372727 | gene-MA16_Dca011246 |
| novel_miR_53  | -1.956372727 | gene-MA16_Dca003197 |
| novel_miR_53  | -1.956372727 | gene-MA16_Dca012420 |
| novel_miR_53  | -1.956372727 | gene-MA16_Dca001258 |
| novel_miR_53  | -1.956372727 | gene-MA16_Dca006414 |
| novel_miR_53  | -1.956372727 | gene-MA16_Dca021885 |
| novel_miR_53  | -1.956372727 | gene-MA16_Dca023972 |
| novel_miR_53  | -1.956372727 | gene-MA16_Dca014156 |
| novel_miR_53  | -1.956372727 | gene-MA16_Dca007605 |
| novel_miR_53  | -1.956372727 | gene-MA16_Dca022196 |
| novel_miR_53  | -1.956372727 | gene-MA16_Dca015291 |
| novel_miR_304 | 0.901669585  | gene-MA16_Dca023243 |
| novel_miR_304 | 0.901669585  | gene-MA16_Dca026084 |
| novel_miR_304 | 0.901669585  | gene-MA16_Dca019935 |
| novel_miR_304 | 0.901669585  | gene-MA16_Dca014822 |
| novel_miR_304 | 0.901669585  | gene-MA16_Dca015763 |
| novel_miR_304 | 0.901669585  | gene-MA16_Dca005051 |
| novel_miR_304 | 0.901669585  | gene-MA16_Dca014450 |
| novel_miR_304 | 0.901669585  | gene-MA16_Dca027654 |
| novel_miR_304 | 0.901669585  | gene-MA16_Dca007509 |
| novel_miR_304 | 0.901669585  | gene-MA16_Dca005183 |
| novel_miR_304 | 0.901669585  | gene-MA16_Dca014980 |
| novel_miR_304 | 0.901669585  | gene-MA16_Dca014981 |
| novel_miR_304 | 0.901669585  | gene-MA16_Dca022317 |
| novel_miR_304 | 0.901669585  | gene-MA16_Dca014820 |
| novel_miR_304 | 0.901669585  | gene-MA16_Dca016634 |
| novel_miR_275 | -0.691215158 | gene-MA16_Dca002588 |
| novel_miR_275 | -0.691215158 | gene-MA16_Dca018663 |
| novel_miR_275 | -0.691215158 | gene-MA16_Dca015366 |
| novel_miR_275 | -0.691215158 | gene-MA16_Dca013677 |
| novel_miR_275 | -0.691215158 | gene-MA16_Dca002895 |
| novel_miR_275 | -0.691215158 | gene-MA16_Dca010185 |
| novel_miR_275 | -0.691215158 | gene-MA16_Dca014504 |
| novel_miR_275 | -0.691215158 | gene-MA16_Dca008901 |

|               |              |                     |
|---------------|--------------|---------------------|
| novel_miR_275 | -0.691215158 | gene-MA16_Dca009632 |
| novel_miR_275 | -0.691215158 | gene-MA16_Dca020488 |
| miR393b_3p    | 0.715544357  | gene-MA16_Dca024562 |
| novel_miR_83  | 0.614603692  | gene-MA16_Dca010287 |
| novel_miR_83  | 0.614603692  | gene-MA16_Dca008310 |
| novel_miR_83  | 0.614603692  | gene-MA16_Dca006555 |
| novel_miR_83  | 0.614603692  | gene-MA16_Dca023565 |
| novel_miR_83  | 0.614603692  | gene-MA16_Dca008336 |
| novel_miR_83  | 0.614603692  | gene-MA16_Dca026847 |
| novel_miR_83  | 0.614603692  | gene-MA16_Dca016013 |
| novel_miR_83  | 0.614603692  | gene-MA16_Dca010769 |
| novel_miR_83  | 0.614603692  | gene-MA16_Dca024729 |
| novel_miR_83  | 0.614603692  | gene-MA16_Dca001201 |
| novel_miR_83  | 0.614603692  | gene-MA16_Dca000143 |
| novel_miR_83  | 0.614603692  | gene-MA16_Dca000721 |
| novel_miR_83  | 0.614603692  | gene-MA16_Dca006432 |
| novel_miR_141 | 0.701457284  | gene-MA16_Dca026118 |
| novel_miR_141 | 0.701457284  | gene-MA16_Dca007698 |
| miR396b_1     | 0.71194909   | gene-MA16_Dca005596 |
| miR396b_1     | 0.71194909   | gene-MA16_Dca016354 |
| miR396b_1     | 0.71194909   | gene-MA16_Dca013418 |
| miR396b_1     | 0.71194909   | gene-MA16_Dca007307 |
| miR396b_1     | 0.71194909   | gene-MA16_Dca017977 |
| miR396b_1     | 0.71194909   | gene-MA16_Dca014266 |
| miR396b_1     | 0.71194909   | gene-MA16_Dca016598 |
| miR396b_1     | 0.71194909   | gene-MA16_Dca001930 |
| miR396b_1     | 0.71194909   | gene-MA16_Dca014260 |
| miR396b_1     | 0.71194909   | gene-MA16_Dca022287 |
| miR396b_1     | 0.71194909   | gene-MA16_Dca024909 |
| miR396b_1     | 0.71194909   | gene-MA16_Dca004133 |
| miR396b_1     | 0.71194909   | gene-MA16_Dca025782 |
| miR396b_1     | 0.71194909   | gene-MA16_Dca004158 |
| miR396b_1     | 0.71194909   | gene-MA16_Dca023002 |
| miR396b_1     | 0.71194909   | gene-MA16_Dca008028 |
| miR396b_1     | 0.71194909   | gene-MA16_Dca014631 |
| miR396b_1     | 0.71194909   | gene-MA16_Dca004139 |
| miR396b_1     | 0.71194909   | gene-MA16_Dca018722 |
| miR396b_1     | 0.71194909   | gene-MA16_Dca021860 |

|           |            |                     |
|-----------|------------|---------------------|
| miR396b_1 | 0.71194909 | gene-MA16_Dca012576 |
| miR396b_1 | 0.71194909 | gene-MA16_Dca003694 |
| miR396b_1 | 0.71194909 | gene-MA16_Dca021863 |
| miR396b_1 | 0.71194909 | gene-MA16_Dca005799 |
| miR396b_1 | 0.71194909 | gene-MA16_Dca022508 |
| miR396b_1 | 0.71194909 | gene-MA16_Dca018725 |
| miR396b_1 | 0.71194909 | gene-MA16_Dca023691 |
| miR396b_1 | 0.71194909 | gene-MA16_Dca023840 |
| miR396b_1 | 0.71194909 | gene-MA16_Dca010315 |
| miR396b_1 | 0.71194909 | gene-MA16_Dca006059 |
| miR396b_1 | 0.71194909 | gene-MA16_Dca022211 |
| miR396b_1 | 0.71194909 | gene-MA16_Dca000152 |
| miR396b_1 | 0.71194909 | gene-MA16_Dca021850 |
| miR396b_1 | 0.71194909 | gene-MA16_Dca006898 |
| miR396b_1 | 0.71194909 | gene-MA16_Dca019153 |
| miR396b_1 | 0.71194909 | gene-MA16_Dca019207 |
| miR396b_1 | 0.71194909 | gene-MA16_Dca010222 |
| miR396b_1 | 0.71194909 | gene-MA16_Dca023379 |
| miR396b_1 | 0.71194909 | gene-MA16_Dca019943 |
| miR396b_1 | 0.71194909 | gene-MA16_Dca000754 |
| miR396b_1 | 0.71194909 | gene-MA16_Dca013497 |
| miR396b_1 | 0.71194909 | gene-MA16_Dca018548 |
| miR396b_1 | 0.71194909 | gene-MA16_Dca018172 |
| miR396b_1 | 0.71194909 | gene-MA16_Dca001920 |
| miR396b_1 | 0.71194909 | gene-MA16_Dca012093 |
| miR396b_1 | 0.71194909 | gene-MA16_Dca024581 |
| miR396b_1 | 0.71194909 | gene-MA16_Dca001936 |
| miR396b_1 | 0.71194909 | gene-MA16_Dca024442 |
| miR396b_1 | 0.71194909 | gene-MA16_Dca001785 |
| miR396b_1 | 0.71194909 | gene-MA16_Dca006179 |
| miR396b_1 | 0.71194909 | gene-MA16_Dca001199 |
| miR396b_1 | 0.71194909 | gene-MA16_Dca004093 |
| miR396b_1 | 0.71194909 | gene-MA16_Dca002377 |
| miR396b_1 | 0.71194909 | gene-MA16_Dca026927 |
| miR396b_1 | 0.71194909 | gene-MA16_Dca006631 |
| miR396b_1 | 0.71194909 | gene-MA16_Dca012128 |
| miR396b_1 | 0.71194909 | gene-MA16_Dca002242 |
| miR396b_1 | 0.71194909 | gene-MA16_Dca011294 |
| miR396b_1 | 0.71194909 | gene-MA16_Dca001955 |
| miR396b_1 | 0.71194909 | gene-MA16_Dca010163 |
| miR396b_1 | 0.71194909 | gene-MA16_Dca010619 |
| miR396b_1 | 0.71194909 | gene-MA16_Dca020583 |
| miR396b_1 | 0.71194909 | gene-MA16_Dca003911 |
| miR396b_1 | 0.71194909 | gene-MA16_Dca028471 |

|           |            |                     |
|-----------|------------|---------------------|
| miR396b_1 | 0.71194909 | gene-MA16_Dca025262 |
| miR396b_1 | 0.71194909 | gene-MA16_Dca011382 |
| miR396b_1 | 0.71194909 | gene-MA16_Dca012099 |
| miR396b_1 | 0.71194909 | gene-MA16_Dca020910 |
| miR396b_1 | 0.71194909 | gene-MA16_Dca010708 |
| miR396b_1 | 0.71194909 | gene-MA16_Dca004692 |
| miR396b_1 | 0.71194909 | gene-MA16_Dca003177 |
| miR396b_1 | 0.71194909 | gene-MA16_Dca024988 |
| miR396b_1 | 0.71194909 | gene-MA16_Dca027492 |
| miR396b_1 | 0.71194909 | gene-MA16_Dca011959 |
| miR396b_1 | 0.71194909 | gene-MA16_Dca011627 |
| miR396b_1 | 0.71194909 | gene-MA16_Dca021446 |
| miR396b_1 | 0.71194909 | gene-MA16_Dca020207 |
| miR396b_1 | 0.71194909 | gene-MA16_Dca007949 |
| miR396b_1 | 0.71194909 | gene-MA16_Dca016956 |
| miR396b_1 | 0.71194909 | gene-MA16_Dca011603 |
| miR396b_1 | 0.71194909 | gene-MA16_Dca013322 |
| miR396b_1 | 0.71194909 | gene-MA16_Dca025223 |
| miR396b_1 | 0.71194909 | gene-MA16_Dca009226 |
| miR396b_1 | 0.71194909 | gene-MA16_Dca024281 |
| miR396b_1 | 0.71194909 | gene-MA16_Dca015409 |
| miR396b_1 | 0.71194909 | gene-MA16_Dca023601 |
| miR396b_1 | 0.71194909 | gene-MA16_Dca004403 |
| miR396b_1 | 0.71194909 | gene-MA16_Dca019222 |
| miR396b_1 | 0.71194909 | gene-MA16_Dca024737 |
| miR396b_1 | 0.71194909 | gene-MA16_Dca014751 |
| miR396b_1 | 0.71194909 | gene-MA16_Dca022302 |
| miR396b_1 | 0.71194909 | gene-MA16_Dca005617 |
| miR396b_1 | 0.71194909 | gene-MA16_Dca000619 |
| miR396b_1 | 0.71194909 | gene-MA16_Dca002697 |
| miR396b_1 | 0.71194909 | gene-MA16_Dca007955 |
| miR396b_1 | 0.71194909 | gene-MA16_Dca020801 |
| miR396b_1 | 0.71194909 | gene-MA16_Dca012938 |
| miR396b_1 | 0.71194909 | gene-MA16_Dca002241 |
| miR396b_1 | 0.71194909 | gene-MA16_Dca019707 |
| miR396b_1 | 0.71194909 | gene-MA16_Dca020166 |
| miR396b_1 | 0.71194909 | gene-MA16_Dca018345 |
| miR396b_1 | 0.71194909 | gene-MA16_Dca008222 |
| miR396b_1 | 0.71194909 | gene-MA16_Dca006666 |
| miR396b_1 | 0.71194909 | gene-MA16_Dca007694 |
| miR396b_1 | 0.71194909 | gene-MA16_Dca000885 |
| miR396b_1 | 0.71194909 | gene-MA16_Dca011783 |
| miR396b_1 | 0.71194909 | gene-MA16_Dca005151 |
| miR396b_1 | 0.71194909 | gene-MA16_Dca011967 |

|              |             |                     |
|--------------|-------------|---------------------|
| miR396b_1    | 0.71194909  | gene-MA16_Dca011523 |
| miR396b_1    | 0.71194909  | gene-MA16_Dca011751 |
| miR396b_1    | 0.71194909  | gene-MA16_Dca015263 |
| miR396b_1    | 0.71194909  | gene-MA16_Dca005154 |
| novel_miR_36 | 1.415174644 | gene-MA16_Dca019065 |
| novel_miR_36 | 1.415174644 | gene-MA16_Dca020471 |
| novel_miR_36 | 1.415174644 | gene-MA16_Dca000545 |
| novel_miR_36 | 1.415174644 | gene-MA16_Dca021431 |
| novel_miR_36 | 1.415174644 | gene-MA16_Dca012725 |
| novel_miR_36 | 1.415174644 | gene-MA16_Dca014216 |
| novel_miR_36 | 1.415174644 | gene-MA16_Dca011134 |
| novel_miR_36 | 1.415174644 | gene-MA16_Dca000756 |
| novel_miR_36 | 1.415174644 | gene-MA16_Dca000998 |
| novel_miR_36 | 1.415174644 | gene-MA16_Dca018248 |
| novel_miR_36 | 1.415174644 | gene-MA16_Dca000532 |
| novel_miR_36 | 1.415174644 | gene-MA16_Dca027962 |
| novel_miR_36 | 1.415174644 | gene-MA16_Dca010554 |
| novel_miR_36 | 1.415174644 | gene-MA16_Dca001894 |
| novel_miR_36 | 1.415174644 | gene-MA16_Dca013923 |
| novel_miR_36 | 1.415174644 | gene-MA16_Dca005787 |
| novel_miR_36 | 1.415174644 | gene-MA16_Dca007864 |
| novel_miR_36 | 1.415174644 | gene-MA16_Dca016860 |
| novel_miR_36 | 1.415174644 | gene-MA16_Dca024909 |
| novel_miR_36 | 1.415174644 | gene-MA16_Dca009506 |
| novel_miR_36 | 1.415174644 | gene-MA16_Dca002451 |
| novel_miR_36 | 1.415174644 | gene-MA16_Dca000981 |
| novel_miR_36 | 1.415174644 | gene-MA16_Dca002514 |
| novel_miR_36 | 1.415174644 | gene-MA16_Dca028508 |
| novel_miR_36 | 1.415174644 | gene-MA16_Dca003966 |
| novel_miR_36 | 1.415174644 | gene-MA16_Dca020080 |
| novel_miR_36 | 1.415174644 | gene-MA16_Dca018457 |
| novel_miR_36 | 1.415174644 | gene-MA16_Dca019557 |
| novel_miR_36 | 1.415174644 | gene-MA16_Dca023835 |
| novel_miR_36 | 1.415174644 | gene-MA16_Dca010684 |
| novel_miR_36 | 1.415174644 | gene-MA16_Dca024050 |
| novel_miR_36 | 1.415174644 | gene-MA16_Dca014331 |
| novel_miR_36 | 1.415174644 | gene-MA16_Dca012607 |
| novel_miR_36 | 1.415174644 | gene-MA16_Dca000014 |
| novel_miR_36 | 1.415174644 | gene-MA16_Dca021283 |
| novel_miR_36 | 1.415174644 | gene-MA16_Dca003117 |
| novel_miR_36 | 1.415174644 | gene-MA16_Dca003709 |
| novel_miR_36 | 1.415174644 | gene-MA16_Dca000891 |
| novel_miR_36 | 1.415174644 | gene-MA16_Dca006786 |

|              |             |                     |
|--------------|-------------|---------------------|
| novel_miR_36 | 1.415174644 | gene-MA16_Dca004003 |
| novel_miR_36 | 1.415174644 | gene-MA16_Dca021158 |
| novel_miR_36 | 1.415174644 | gene-MA16_Dca010535 |
| novel_miR_36 | 1.415174644 | gene-MA16_Dca013981 |
| novel_miR_36 | 1.415174644 | gene-MA16_Dca006650 |
| novel_miR_36 | 1.415174644 | gene-MA16_Dca019758 |
| novel_miR_36 | 1.415174644 | gene-MA16_Dca024982 |
| novel_miR_36 | 1.415174644 | gene-MA16_Dca009980 |
| novel_miR_36 | 1.415174644 | gene-MA16_Dca001915 |
| novel_miR_36 | 1.415174644 | gene-MA16_Dca027576 |
| novel_miR_36 | 1.415174644 | gene-MA16_Dca014756 |
| novel_miR_36 | 1.415174644 | gene-MA16_Dca004014 |
| novel_miR_36 | 1.415174644 | gene-MA16_Dca004713 |
| novel_miR_36 | 1.415174644 | gene-MA16_Dca014400 |
| novel_miR_36 | 1.415174644 | gene-MA16_Dca025030 |
| novel_miR_36 | 1.415174644 | gene-MA16_Dca006821 |
| novel_miR_36 | 1.415174644 | gene-MA16_Dca007063 |
| novel_miR_36 | 1.415174644 | gene-MA16_Dca021282 |
| novel_miR_36 | 1.415174644 | gene-MA16_Dca010505 |
| novel_miR_36 | 1.415174644 | gene-MA16_Dca006834 |
| novel_miR_36 | 1.415174644 | gene-MA16_Dca006592 |
| novel_miR_36 | 1.415174644 | gene-MA16_Dca016085 |
| novel_miR_36 | 1.415174644 | gene-MA16_Dca020908 |
| novel_miR_36 | 1.415174644 | gene-MA16_Dca008320 |
| novel_miR_36 | 1.415174644 | gene-MA16_Dca025409 |
| novel_miR_36 | 1.415174644 | gene-MA16_Dca027301 |
| novel_miR_36 | 1.415174644 | gene-MA16_Dca025553 |
| novel_miR_36 | 1.415174644 | gene-MA16_Dca024504 |
| novel_miR_36 | 1.415174644 | gene-MA16_Dca000308 |
| novel_miR_36 | 1.415174644 | gene-MA16_Dca016262 |
| novel_miR_36 | 1.415174644 | gene-MA16_Dca018766 |
| novel_miR_36 | 1.415174644 | gene-MA16_Dca009185 |
| novel_miR_36 | 1.415174644 | gene-MA16_Dca007565 |
| novel_miR_36 | 1.415174644 | gene-MA16_Dca006362 |
| novel_miR_36 | 1.415174644 | gene-MA16_Dca016370 |
| novel_miR_36 | 1.415174644 | gene-MA16_Dca021043 |
| novel_miR_36 | 1.415174644 | gene-MA16_Dca026698 |
| novel_miR_36 | 1.415174644 | gene-MA16_Dca020464 |
| novel_miR_36 | 1.415174644 | gene-MA16_Dca002971 |
| novel_miR_36 | 1.415174644 | gene-MA16_Dca004287 |
| novel_miR_36 | 1.415174644 | gene-MA16_Dca019933 |
| novel_miR_36 | 1.415174644 | gene-MA16_Dca023526 |
| novel_miR_36 | 1.415174644 | gene-MA16_Dca026606 |
| novel_miR_36 | 1.415174644 | gene-MA16_Dca021281 |

|              |             |                     |
|--------------|-------------|---------------------|
| novel_miR_36 | 1.415174644 | gene-MA16_Dca004093 |
| novel_miR_36 | 1.415174644 | gene-MA16_Dca021264 |
| novel_miR_36 | 1.415174644 | gene-MA16_Dca019418 |
| novel_miR_36 | 1.415174644 | gene-MA16_Dca024861 |
| novel_miR_36 | 1.415174644 | gene-MA16_Dca023178 |
| novel_miR_36 | 1.415174644 | gene-MA16_Dca018127 |
| novel_miR_36 | 1.415174644 | gene-MA16_Dca016809 |
| novel_miR_36 | 1.415174644 | gene-MA16_Dca023572 |
| novel_miR_36 | 1.415174644 | gene-MA16_Dca003059 |
| novel_miR_36 | 1.415174644 | gene-MA16_Dca021850 |
| novel_miR_36 | 1.415174644 | gene-MA16_Dca005952 |
| novel_miR_36 | 1.415174644 | gene-MA16_Dca007629 |
| novel_miR_36 | 1.415174644 | gene-MA16_Dca000832 |
| novel_miR_36 | 1.415174644 | gene-MA16_Dca014211 |
| novel_miR_36 | 1.415174644 | gene-MA16_Dca011125 |
| novel_miR_36 | 1.415174644 | gene-MA16_Dca010287 |
| novel_miR_36 | 1.415174644 | gene-MA16_Dca022643 |
| novel_miR_36 | 1.415174644 | gene-MA16_Dca005341 |
| novel_miR_36 | 1.415174644 | gene-MA16_Dca015149 |
| novel_miR_36 | 1.415174644 | gene-MA16_Dca009014 |
| novel_miR_36 | 1.415174644 | gene-MA16_Dca007413 |
| novel_miR_36 | 1.415174644 | gene-MA16_Dca009995 |
| novel_miR_36 | 1.415174644 | gene-MA16_Dca003869 |
| novel_miR_36 | 1.415174644 | gene-MA16_Dca006386 |
| novel_miR_36 | 1.415174644 | gene-MA16_Dca002837 |
| novel_miR_36 | 1.415174644 | gene-MA16_Dca000558 |
| novel_miR_36 | 1.415174644 | gene-MA16_Dca003718 |
| novel_miR_36 | 1.415174644 | gene-MA16_Dca023524 |
| novel_miR_36 | 1.415174644 | gene-MA16_Dca023411 |
| novel_miR_36 | 1.415174644 | gene-MA16_Dca006773 |
| novel_miR_36 | 1.415174644 | gene-MA16_Dca009122 |
| novel_miR_36 | 1.415174644 | gene-MA16_Dca019385 |
| novel_miR_36 | 1.415174644 | gene-MA16_Dca021058 |
| novel_miR_36 | 1.415174644 | gene-MA16_Dca008399 |
| novel_miR_36 | 1.415174644 | gene-MA16_Dca002388 |
| novel_miR_36 | 1.415174644 | gene-MA16_Dca000925 |
| novel_miR_36 | 1.415174644 | gene-MA16_Dca002118 |
| novel_miR_36 | 1.415174644 | gene-MA16_Dca022280 |
| novel_miR_36 | 1.415174644 | gene-MA16_Dca016304 |
| novel_miR_36 | 1.415174644 | gene-MA16_Dca017029 |
| novel_miR_36 | 1.415174644 | gene-MA16_Dca007845 |
| novel_miR_36 | 1.415174644 | gene-MA16_Dca002586 |
| novel_miR_36 | 1.415174644 | gene-MA16_Dca000247 |
| novel_miR_36 | 1.415174644 | gene-MA16_Dca016371 |

|               |              |                     |
|---------------|--------------|---------------------|
| novel_miR_36  | 1.415174644  | gene-MA16_Dca010730 |
| novel_miR_36  | 1.415174644  | gene-MA16_Dca025840 |
| novel_miR_36  | 1.415174644  | gene-MA16_Dca004007 |
| novel_miR_36  | 1.415174644  | gene-MA16_Dca015376 |
| novel_miR_36  | 1.415174644  | gene-MA16_Dca002952 |
| novel_miR_36  | 1.415174644  | gene-MA16_Dca012778 |
| novel_miR_36  | 1.415174644  | gene-MA16_Dca010799 |
| novel_miR_36  | 1.415174644  | gene-MA16_Dca001427 |
| novel_miR_36  | 1.415174644  | gene-MA16_Dca023966 |
| novel_miR_36  | 1.415174644  | gene-MA16_Dca023056 |
| novel_miR_36  | 1.415174644  | gene-MA16_Dca003169 |
| novel_miR_36  | 1.415174644  | gene-MA16_Dca011335 |
| novel_miR_36  | 1.415174644  | gene-MA16_Dca004266 |
| novel_miR_36  | 1.415174644  | gene-MA16_Dca006091 |
| novel_miR_36  | 1.415174644  | gene-MA16_Dca013596 |
| novel_miR_36  | 1.415174644  | gene-MA16_Dca027711 |
| novel_miR_36  | 1.415174644  | gene-MA16_Dca017554 |
| novel_miR_36  | 1.415174644  | gene-MA16_Dca026346 |
| novel_miR_36  | 1.415174644  | gene-MA16_Dca016864 |
| novel_miR_36  | 1.415174644  | gene-MA16_Dca016800 |
| novel_miR_36  | 1.415174644  | gene-MA16_Dca024809 |
| novel_miR_36  | 1.415174644  | gene-MA16_Dca021203 |
| novel_miR_36  | 1.415174644  | gene-MA16_Dca006479 |
| novel_miR_36  | 1.415174644  | gene-MA16_Dca004957 |
| novel_miR_36  | 1.415174644  | gene-MA16_Dca000326 |
| novel_miR_36  | 1.415174644  | gene-MA16_Dca020366 |
| novel_miR_36  | 1.415174644  | gene-MA16_Dca003650 |
| novel_miR_223 | 0.785835068  | gene-MA16_Dca022487 |
| novel_miR_236 | 0.700468644  | gene-MA16_Dca026583 |
| novel_miR_236 | 0.700468644  | gene-MA16_Dca017549 |
| novel_miR_236 | 0.700468644  | gene-MA16_Dca002308 |
| novel_miR_236 | 0.700468644  | gene-MA16_Dca004606 |
| novel_miR_236 | 0.700468644  | gene-MA16_Dca007852 |
| novel_miR_236 | 0.700468644  | gene-MA16_Dca011099 |
| novel_miR_236 | 0.700468644  | gene-MA16_Dca007249 |
| novel_miR_236 | 0.700468644  | gene-MA16_Dca003804 |
| novel_miR_236 | 0.700468644  | gene-MA16_Dca014769 |
| miR157d_3p    | -1.256108966 | gene-MA16_Dca001937 |
| miR157d_3p    | -1.256108966 | gene-MA16_Dca021175 |
| miR157d_3p    | -1.256108966 | gene-MA16_Dca010207 |
| miR157d_3p    | -1.256108966 | gene-MA16_Dca008286 |
| miR157d_3p    | -1.256108966 | gene-MA16_Dca006136 |
| miR157d_3p    | -1.256108966 | gene-MA16_Dca026671 |



|               |              |                     |
|---------------|--------------|---------------------|
| miR157d_3p    | -1.256108966 | gene-MA16_Dca015720 |
| miR157d_3p    | -1.256108966 | gene-MA16_Dca004199 |
| miR157d_3p    | -1.256108966 | gene-MA16_Dca011973 |
| miR157d_3p    | -1.256108966 | gene-MA16_Dca012946 |
| miR157d_3p    | -1.256108966 | gene-MA16_Dca022543 |
| miR157d_3p    | -1.256108966 | gene-MA16_Dca002954 |
| miR157d_3p    | -1.256108966 | gene-MA16_Dca009889 |
| miR157d_3p    | -1.256108966 | gene-MA16_Dca025192 |
| miR157d_3p    | -1.256108966 | gene-MA16_Dca015957 |
| miR528_5p     | -1.034599625 | gene-MA16_Dca020077 |
| miR528_5p     | -1.034599625 | gene-MA16_Dca010331 |
| miR528_5p     | -1.034599625 | gene-MA16_Dca002770 |
| miR528_5p     | -1.034599625 | gene-MA16_Dca004667 |
| miR528_5p     | -1.034599625 | gene-MA16_Dca000891 |
| miR528_5p     | -1.034599625 | gene-MA16_Dca027730 |
| miR528_5p     | -1.034599625 | gene-MA16_Dca012338 |
| miR528_5p     | -1.034599625 | gene-MA16_Dca015008 |
| miR528_5p     | -1.034599625 | gene-MA16_Dca021334 |
| miR528_5p     | -1.034599625 | gene-MA16_Dca013643 |
| miR528_5p     | -1.034599625 | gene-MA16_Dca022587 |
| miR528_5p     | -1.034599625 | gene-MA16_Dca014181 |
| miR528_5p     | -1.034599625 | gene-MA16_Dca015948 |
| miR528_5p     | -1.034599625 | gene-MA16_Dca013418 |
| miR528_5p     | -1.034599625 | gene-MA16_Dca028734 |
| miR528_5p     | -1.034599625 | gene-MA16_Dca020299 |
| miR528_5p     | -1.034599625 | gene-MA16_Dca009198 |
| miR528_5p     | -1.034599625 | gene-MA16_Dca021947 |
| miR528_5p     | -1.034599625 | gene-MA16_Dca026005 |
| miR528_5p     | -1.034599625 | gene-MA16_Dca011035 |
| miR528_5p     | -1.034599625 | gene-MA16_Dca010931 |
| miR528_5p     | -1.034599625 | gene-MA16_Dca019975 |
| miR528_5p     | -1.034599625 | gene-MA16_Dca001951 |
| miR528_5p     | -1.034599625 | gene-MA16_Dca000698 |
| miR528_5p     | -1.034599625 | gene-MA16_Dca011273 |
| miR528_5p     | -1.034599625 | gene-MA16_Dca002672 |
| miR528_5p     | -1.034599625 | gene-MA16_Dca026199 |
| miR528_5p     | -1.034599625 | gene-MA16_Dca020850 |
| miR528_5p     | -1.034599625 | gene-MA16_Dca003559 |
| miR528_5p     | -1.034599625 | gene-MA16_Dca026841 |
| miR528_5p     | -1.034599625 | gene-MA16_Dca026559 |
| novel_miR_431 | 0.722194154  | gene-MA16_Dca019557 |
| miR8565d      | 0.589107991  | gene-MA16_Dca009952 |
| miR8032f_3p   | -0.735553454 | gene-MA16_Dca000347 |

|              |              |                     |
|--------------|--------------|---------------------|
| miR7994a     | 0.631452312  | gene-MA16_Dca009302 |
| miR7994a     | 0.631452312  | gene-MA16_Dca001651 |
| miR7994a     | 0.631452312  | gene-MA16_Dca024189 |
| miR7994a     | 0.631452312  | gene-MA16_Dca015708 |
| miR7994a     | 0.631452312  | gene-MA16_Dca027522 |
| miR951       | -0.697528726 | gene-MA16_Dca004416 |
| miR164e_5p_3 | 0.756720901  | gene-MA16_Dca002744 |
| miR164e_5p_3 | 0.756720901  | gene-MA16_Dca021600 |
| miR164e_5p_3 | 0.756720901  | gene-MA16_Dca023179 |
| miR164e_5p_3 | 0.756720901  | gene-MA16_Dca016023 |
| miR164e_5p_3 | 0.756720901  | gene-MA16_Dca008993 |
| miR164e_5p_3 | 0.756720901  | gene-MA16_Dca005860 |
| miR164e_5p_3 | 0.756720901  | gene-MA16_Dca006933 |
| miR164e_5p_3 | 0.756720901  | gene-MA16_Dca000173 |
| miR164e_5p_3 | 0.756720901  | gene-MA16_Dca004236 |
| miR164e_5p_3 | 0.756720901  | gene-MA16_Dca015801 |
| miR164e_5p_3 | 0.756720901  | gene-MA16_Dca015159 |
| miR164e_5p_3 | 0.756720901  | gene-MA16_Dca022156 |
| miR164e_5p_3 | 0.756720901  | gene-MA16_Dca020570 |
| miR164e_5p_3 | 0.756720901  | gene-MA16_Dca004955 |
| miR164e_5p_3 | 0.756720901  | gene-MA16_Dca027794 |
| miR164e_5p_3 | 0.756720901  | gene-MA16_Dca020338 |
| miR164e_5p_3 | 0.756720901  | gene-MA16_Dca026959 |
| miR164e_5p_3 | 0.756720901  | gene-MA16_Dca025776 |
| miR164e_5p_3 | 0.756720901  | gene-MA16_Dca009952 |
| miR164e_5p_3 | 0.756720901  | gene-MA16_Dca021318 |
| miR164e_5p_3 | 0.756720901  | gene-MA16_Dca013976 |
| miR164e_5p_3 | 0.756720901  | gene-MA16_Dca020264 |
| miR164e_5p_3 | 0.756720901  | gene-MA16_Dca012661 |
| miR164e_5p_2 | 0.757229161  | gene-MA16_Dca015801 |
| miR164e_5p_2 | 0.757229161  | gene-MA16_Dca008993 |
| miR164e_5p_2 | 0.757229161  | gene-MA16_Dca016023 |
| miR164e_5p_2 | 0.757229161  | gene-MA16_Dca005860 |
| miR164e_5p_2 | 0.757229161  | gene-MA16_Dca006933 |
| miR164e_5p_2 | 0.757229161  | gene-MA16_Dca004236 |
| miR164e_5p_2 | 0.757229161  | gene-MA16_Dca000173 |
| miR164e_5p_2 | 0.757229161  | gene-MA16_Dca023179 |
| miR164e_5p_2 | 0.757229161  | gene-MA16_Dca002744 |
| miR164e_5p_2 | 0.757229161  | gene-MA16_Dca021600 |
| miR164e_5p_2 | 0.757229161  | gene-MA16_Dca013976 |
| miR164e_5p_2 | 0.757229161  | gene-MA16_Dca020264 |
| miR164e_5p_2 | 0.757229161  | gene-MA16_Dca012661 |

|              |             |                     |
|--------------|-------------|---------------------|
| miR164e_5p_2 | 0.757229161 | gene-MA16_Dca020338 |
| miR164e_5p_2 | 0.757229161 | gene-MA16_Dca026959 |
| miR164e_5p_2 | 0.757229161 | gene-MA16_Dca025776 |
| miR164e_5p_2 | 0.757229161 | gene-MA16_Dca021318 |
| miR164e_5p_2 | 0.757229161 | gene-MA16_Dca009952 |
| miR164e_5p_2 | 0.757229161 | gene-MA16_Dca020570 |
| miR164e_5p_2 | 0.757229161 | gene-MA16_Dca004955 |
| miR164e_5p_2 | 0.757229161 | gene-MA16_Dca027794 |
| miR164e_5p_2 | 0.757229161 | gene-MA16_Dca015159 |
| miR164e_5p_2 | 0.757229161 | gene-MA16_Dca022156 |
| miR164e_5p_1 | 0.73741028  | gene-MA16_Dca015159 |
| miR164e_5p_1 | 0.73741028  | gene-MA16_Dca022156 |
| miR164e_5p_1 | 0.73741028  | gene-MA16_Dca020570 |
| miR164e_5p_1 | 0.73741028  | gene-MA16_Dca004955 |
| miR164e_5p_1 | 0.73741028  | gene-MA16_Dca027794 |
| miR164e_5p_1 | 0.73741028  | gene-MA16_Dca026959 |
| miR164e_5p_1 | 0.73741028  | gene-MA16_Dca020338 |
| miR164e_5p_1 | 0.73741028  | gene-MA16_Dca025776 |
| miR164e_5p_1 | 0.73741028  | gene-MA16_Dca009952 |
| miR164e_5p_1 | 0.73741028  | gene-MA16_Dca021318 |
| miR164e_5p_1 | 0.73741028  | gene-MA16_Dca013976 |
| miR164e_5p_1 | 0.73741028  | gene-MA16_Dca012661 |
| miR164e_5p_1 | 0.73741028  | gene-MA16_Dca020264 |
| miR164e_5p_1 | 0.73741028  | gene-MA16_Dca002744 |
| miR164e_5p_1 | 0.73741028  | gene-MA16_Dca021600 |
| miR164e_5p_1 | 0.73741028  | gene-MA16_Dca023179 |
| miR164e_5p_1 | 0.73741028  | gene-MA16_Dca008993 |
| miR164e_5p_1 | 0.73741028  | gene-MA16_Dca016023 |
| miR164e_5p_1 | 0.73741028  | gene-MA16_Dca005860 |
| miR164e_5p_1 | 0.73741028  | gene-MA16_Dca006933 |
| miR164e_5p_1 | 0.73741028  | gene-MA16_Dca004236 |
| miR164e_5p_1 | 0.73741028  | gene-MA16_Dca000173 |
| miR164e_5p_1 | 0.73741028  | gene-MA16_Dca015801 |
| miR164e_5p_4 | 0.73749685  | gene-MA16_Dca023179 |
| miR164e_5p_4 | 0.73749685  | gene-MA16_Dca021600 |
| miR164e_5p_4 | 0.73749685  | gene-MA16_Dca002744 |
| miR164e_5p_4 | 0.73749685  | gene-MA16_Dca015801 |
| miR164e_5p_4 | 0.73749685  | gene-MA16_Dca006933 |
| miR164e_5p_4 | 0.73749685  | gene-MA16_Dca004236 |
| miR164e_5p_4 | 0.73749685  | gene-MA16_Dca000173 |
| miR164e_5p_4 | 0.73749685  | gene-MA16_Dca008993 |
| miR164e_5p_4 | 0.73749685  | gene-MA16_Dca016023 |
| miR164e_5p_4 | 0.73749685  | gene-MA16_Dca005860 |

|              |             |                     |
|--------------|-------------|---------------------|
| miR164e_5p_4 | 0.73749685  | gene-MA16_Dca027794 |
| miR164e_5p_4 | 0.73749685  | gene-MA16_Dca020570 |
| miR164e_5p_4 | 0.73749685  | gene-MA16_Dca004955 |
| miR164e_5p_4 | 0.73749685  | gene-MA16_Dca015159 |
| miR164e_5p_4 | 0.73749685  | gene-MA16_Dca022156 |
| miR164e_5p_4 | 0.73749685  | gene-MA16_Dca013976 |
| miR164e_5p_4 | 0.73749685  | gene-MA16_Dca012661 |
| miR164e_5p_4 | 0.73749685  | gene-MA16_Dca020264 |
| miR164e_5p_4 | 0.73749685  | gene-MA16_Dca021318 |
| miR164e_5p_4 | 0.73749685  | gene-MA16_Dca009952 |
| miR164e_5p_4 | 0.73749685  | gene-MA16_Dca020338 |
| miR164e_5p_4 | 0.73749685  | gene-MA16_Dca026959 |
| miR164e_5p_4 | 0.73749685  | gene-MA16_Dca025776 |
| miR394d      | 0.883926599 | gene-MA16_Dca010123 |
| miR394d      | 0.883926599 | gene-MA16_Dca020985 |
| miR394d      | 0.883926599 | gene-MA16_Dca004056 |
| miR394d      | 0.883926599 | gene-MA16_Dca009669 |
| miR394d      | 0.883926599 | gene-MA16_Dca007071 |
| miR394d      | 0.883926599 | gene-MA16_Dca012102 |
| miR394d      | 0.883926599 | gene-MA16_Dca014211 |
| miR394d      | 0.883926599 | gene-MA16_Dca011616 |
| miR394d      | 0.883926599 | gene-MA16_Dca002476 |
| miR394d      | 0.883926599 | gene-MA16_Dca006481 |
| miR394d      | 0.883926599 | gene-MA16_Dca015255 |
| miR394d      | 0.883926599 | gene-MA16_Dca014991 |
| miR394d      | 0.883926599 | gene-MA16_Dca011228 |
| miR394d      | 0.883926599 | gene-MA16_Dca008070 |
| miR394d      | 0.883926599 | gene-MA16_Dca024716 |
| miR394d      | 0.883926599 | gene-MA16_Dca003173 |
| miR394d      | 0.883926599 | gene-MA16_Dca021852 |
| miR394d      | 0.883926599 | gene-MA16_Dca024947 |
| miR394d      | 0.883926599 | gene-MA16_Dca003369 |
| miR394d      | 0.883926599 | gene-MA16_Dca009679 |
| miR394d      | 0.883926599 | gene-MA16_Dca011533 |
| miR172d_2    | 0.593718429 | gene-MA16_Dca010160 |
| miR172d_2    | 0.593718429 | gene-MA16_Dca017222 |
| miR172d_2    | 0.593718429 | gene-MA16_Dca002039 |
| miR172d_2    | 0.593718429 | gene-MA16_Dca018756 |
| miR172d_2    | 0.593718429 | gene-MA16_Dca008031 |
| miR172d_2    | 0.593718429 | gene-MA16_Dca020018 |
| miR172d_2    | 0.593718429 | gene-MA16_Dca000260 |
| miR172d_2    | 0.593718429 | gene-MA16_Dca002934 |
| miR172d_2    | 0.593718429 | gene-MA16_Dca022453 |

|           |             |                     |
|-----------|-------------|---------------------|
| miR172d_2 | 0.593718429 | gene-MA16_Dca009661 |
| miR172d_2 | 0.593718429 | gene-MA16_Dca013779 |
| miR172d_2 | 0.593718429 | gene-MA16_Dca022454 |
| miR172d_2 | 0.593718429 | gene-MA16_Dca021336 |
| miR172d_2 | 0.593718429 | gene-MA16_Dca022520 |
| miR172d_2 | 0.593718429 | gene-MA16_Dca016851 |
| miR172d_2 | 0.593718429 | gene-MA16_Dca013460 |
| miR172d_2 | 0.593718429 | gene-MA16_Dca022452 |
| miR172d_2 | 0.593718429 | gene-MA16_Dca006530 |
| miR172d_2 | 0.593718429 | gene-MA16_Dca017910 |
| miR172d_2 | 0.593718429 | gene-MA16_Dca022455 |
| miR172d_2 | 0.593718429 | gene-MA16_Dca007639 |
| miR172d_2 | 0.593718429 | gene-MA16_Dca012666 |
| miR172d_2 | 0.593718429 | gene-MA16_Dca004101 |
| miR172d_2 | 0.593718429 | gene-MA16_Dca001782 |
| miR172d_2 | 0.593718429 | gene-MA16_Dca018995 |
| miR172d_2 | 0.593718429 | gene-MA16_Dca013902 |
| miR172d_2 | 0.593718429 | gene-MA16_Dca020870 |
| miR172d_2 | 0.593718429 | gene-MA16_Dca020793 |
| miR172d_2 | 0.593718429 | gene-MA16_Dca011850 |
| miR172d_2 | 0.593718429 | gene-MA16_Dca016049 |
| miR172d_2 | 0.593718429 | gene-MA16_Dca015839 |
| miR172d_2 | 0.593718429 | gene-MA16_Dca013337 |
| miR172d_2 | 0.593718429 | gene-MA16_Dca018027 |
| miR172d_2 | 0.593718429 | gene-MA16_Dca020826 |
| miR172d_2 | 0.593718429 | gene-MA16_Dca020825 |
| miR172d_1 | 0.593829576 | gene-MA16_Dca021336 |
| miR172d_1 | 0.593829576 | gene-MA16_Dca022520 |
| miR172d_1 | 0.593829576 | gene-MA16_Dca006530 |
| miR172d_1 | 0.593829576 | gene-MA16_Dca016851 |
| miR172d_1 | 0.593829576 | gene-MA16_Dca022452 |
| miR172d_1 | 0.593829576 | gene-MA16_Dca013460 |
| miR172d_1 | 0.593829576 | gene-MA16_Dca022454 |
| miR172d_1 | 0.593829576 | gene-MA16_Dca009661 |
| miR172d_1 | 0.593829576 | gene-MA16_Dca013779 |
| miR172d_1 | 0.593829576 | gene-MA16_Dca008031 |
| miR172d_1 | 0.593829576 | gene-MA16_Dca002934 |
| miR172d_1 | 0.593829576 | gene-MA16_Dca022453 |
| miR172d_1 | 0.593829576 | gene-MA16_Dca020018 |
| miR172d_1 | 0.593829576 | gene-MA16_Dca000260 |
| miR172d_1 | 0.593829576 | gene-MA16_Dca010160 |
| miR172d_1 | 0.593829576 | gene-MA16_Dca017222 |
| miR172d_1 | 0.593829576 | gene-MA16_Dca002039 |
| miR172d_1 | 0.593829576 | gene-MA16_Dca018756 |

|           |             |                     |
|-----------|-------------|---------------------|
| miR172d_1 | 0.593829576 | gene-MA16_Dca013337 |
| miR172d_1 | 0.593829576 | gene-MA16_Dca016049 |
| miR172d_1 | 0.593829576 | gene-MA16_Dca015839 |
| miR172d_1 | 0.593829576 | gene-MA16_Dca020825 |
| miR172d_1 | 0.593829576 | gene-MA16_Dca020826 |
| miR172d_1 | 0.593829576 | gene-MA16_Dca018027 |
| miR172d_1 | 0.593829576 | gene-MA16_Dca020870 |
| miR172d_1 | 0.593829576 | gene-MA16_Dca020793 |
| miR172d_1 | 0.593829576 | gene-MA16_Dca011850 |
| miR172d_1 | 0.593829576 | gene-MA16_Dca001782 |
| miR172d_1 | 0.593829576 | gene-MA16_Dca013902 |
| miR172d_1 | 0.593829576 | gene-MA16_Dca018995 |
| miR172d_1 | 0.593829576 | gene-MA16_Dca004101 |
| miR172d_1 | 0.593829576 | gene-MA16_Dca017910 |
| miR172d_1 | 0.593829576 | gene-MA16_Dca007639 |
| miR172d_1 | 0.593829576 | gene-MA16_Dca012666 |
| miR172d_1 | 0.593829576 | gene-MA16_Dca022455 |

---

Note: FC indicate TPM value of miRNA in FR8/TPM value of miRNA in CK
