# Supplementary material for: RNA sequencing-based exploration of the effects of far-red light on microRNAs involved in the shade-avoidance response of D. officinale
Source: PeerJ journal article supplement (doi:10.7717/peerj.15001), 2023-03-20
Supplement: Table_S9.pdf [file Table_S9.pdf]

Table S9 Annotation of far-red light-responsive targets

| #GeneID             | Nr annotation                                                                                   |
|---------------------|-------------------------------------------------------------------------------------------------|
| gene-MA16_Dca015431 | Premnaspirodien oxygenase [Dendrobium catenatum]                                                |
| gene-MA16_Dca000301 | methyl-CpG-binding domain-containing protein 9 [Dendrobium catenatum]                           |
| gene-MA16_Dca024127 | hypothetical protein MA16_Dca024127 [Dendrobium catenatum]                                      |
| gene-MA16_Dca010769 | Cleavage and polyadenylation specificity factor subunit 3-I [Dendrobium catenatum]              |
| gene-MA16_Dca019438 | hypothetical protein MA16_Dca019438 [Dendrobium catenatum]                                      |
| gene-MA16_Dca026041 | Retrovirus-related Pol polyprotein from transposon TNT 1-94 [Dendrobium catenatum]              |
| gene-MA16_Dca027813 | ATP synthase subunit a [Dendrobium catenatum]                                                   |
| gene-MA16_Dca014899 | putative mitochondrial protein [Dendrobium catenatum]                                           |
| gene-MA16_Dca005380 | Receptor-like serine/threonine-protein kinase ALE2 [Dendrobium catenatum]                       |
| gene-MA16_Dca011056 | alpha,alpha-trehalose-phosphate synthase [UDP-forming] 5-like isoform X1 [Dendrobium catenatum] |
| gene-MA16_Dca019109 | Putative disease resistance RPP13-like protein 1 [Dendrobium catenatum]                         |
| gene-MA16_Dca011273 | LONP2 [Dendrobium catenatum]                                                                    |
| gene-MA16_Dca015801 | Putative WEB family protein [Dendrobium catenatum]                                              |
| gene-MA16_Dca022093 | cysteine proteinase inhibitor 1-like [Dendrobium catenatum]                                     |
| gene-MA16_Dca005153 | transcription factor bHLH49-like isoform X1 [Dendrobium catenatum]                              |
| gene-MA16_Dca003177 | protein LURP-one-related 8-like [Dendrobium catenatum]                                          |
| gene-MA16_Dca008305 | S-adenosylmethionine decarboxylase proenzyme-like [Dendrobium catenatum]                        |
| gene-MA16_Dca009226 | hypothetical protein MA16_Dca009226 [Dendrobium catenatum]                                      |
| gene-MA16_Dca027017 | uncharacterized protein LOC110112043 [Dendrobium catenatum]                                     |
| gene-MA16_Dca025277 | Putative F-box protein [Dendrobium catenatum]                                                   |
| gene-MA16_Dca012405 | hypothetical protein MA16_Dca012405 [Dendrobium catenatum]                                      |
| gene-MA16_Dca009889 | DEAD-box ATP-dependent RNA helicase 13 isoform X1 [Dendrobium catenatum]                        |
| gene-MA16_Dca003356 | hypothetical protein MA16_Dca003356 [Dendrobium catenatum]                                      |
| gene-MA16_Dca019449 | hypothetical protein MA16_Dca019449 [Dendrobium catenatum]                                      |
| gene-MA16_Dca001651 | isoamylase 2, chloroplastic [Dendrobium catenatum]                                              |
| gene-MA16_Dca008190 | BTB/POZ domain-containing protein At5g03250 [Dendrobium catenatum]                              |
| gene-MA16_Dca009632 | Glutamate dehydrogenase 2 [Dendrobium catenatum]                                                |

|                     |                                                                                                      |
|---------------------|------------------------------------------------------------------------------------------------------|
| gene-MA16_Dca022962 | putative E3 ubiquitin-protein ligase LIN-1 [Dendrobium catenatum]                                    |
| gene-MA16_Dca017913 | Serine/threonine-protein phosphatase 7 long form like [Dendrobium catenatum]                         |
| gene-MA16_Dca019929 | RGG repeats nuclear RNA binding protein A-like [Dendrobium catenatum]                                |
| gene-MA16_Dca014804 | peroxisomal fatty acid beta-oxidation multifunctional protein-like isoform X2 [Dendrobium catenatum] |
| gene-MA16_Dca008662 | NAC domain-containing protein 7 [Dendrobium catenatum]                                               |
| gene-MA16_Dca005183 | uncharacterized protein LOC110114487 [Dendrobium catenatum]                                          |
| gene-MA16_Dca021320 | putative ADP-ribosylation factor GTPase-activating protein AGD5 [Dendrobium catenatum]               |
| gene-MA16_Dca008936 | uncharacterized protein LOC110102608 [Dendrobium catenatum]                                          |
| gene-MA16_Dca005929 | Retrovirus-related Pol polyprotein from transposon TNT 1-94 [Dendrobium catenatum]                   |
| gene-MA16_Dca011025 | hypothetical protein MA16_Dca011025 [Dendrobium catenatum]                                           |
| gene-MA16_Dca013677 | putative mitochondrial protein [Dendrobium catenatum]                                                |
| gene-MA16_Dca000652 | hypothetical protein MA16_Dca000652 [Dendrobium catenatum]                                           |
| gene-MA16_Dca029006 | Putative disease resistance protein RGA3 [Dendrobium catenatum]                                      |
| gene-MA16_Dca015802 | callose synthase 10 isoform X2 [Dendrobium catenatum]                                                |
| gene-MA16_Dca024512 | uncharacterized protein LOC110103038 isoform X1 [Dendrobium catenatum]                               |
| gene-MA16_Dca010924 | choline-phosphate cytidylyltransferase 2-like [Dendrobium catenatum]                                 |
| gene-MA16_Dca014444 | beta-glucuronosyltransferase GlcAT14A [Dendrobium catenatum]                                         |
| gene-MA16_Dca015677 | putative transcription factor bHLH041 isoform X1 [Dendrobium catenatum]                              |
| gene-MA16_Dca021951 | hypothetical protein MA16_Dca021951 [Dendrobium catenatum]                                           |
| gene-MA16_Dca006858 | lactation elevated protein 1 isoform X1 [Dendrobium catenatum]                                       |
| gene-MA16_Dca021243 | U-box domain-containing protein 33 [Dendrobium catenatum]                                            |
| gene-MA16_Dca001757 | probable tocopherol cyclase, chloroplastic isoform X1 [Dendrobium catenatum]                         |
| gene-MA16_Dca015808 | Dynamin-related protein 1E [Dendrobium catenatum]                                                    |
| gene-MA16_Dca020366 | hypothetical protein MA16_Dca020366 [Dendrobium catenatum]                                           |
| gene-MA16_Dca012653 | hypothetical protein MA16_Dca012653 [Dendrobium catenatum]                                           |
| gene-MA16_Dca015758 | putative mitochondrial protein [Dendrobium catenatum]                                                |
| gene-MA16_Dca017025 | Rop guanine nucleotide exchange factor 1 [Dendrobium catenatum]                                      |
| gene-MA16_Dca017867 | uncharacterized protein LOC110095911 [Dendrobium catenatum]                                          |
| gene-MA16_Dca009494 | Glutamate receptor 2.7 [Dendrobium catenatum]                                                        |
| gene-MA16_Dca024866 | protein FAR1-RELATED SEQUENCE 11-like [Dendrobium catenatum]                                         |

|                     |                                                                                    |
|---------------------|------------------------------------------------------------------------------------|
| gene-MA16_Dca024847 | hypothetical protein MA16_Dca024847 [Dendrobium catenatum]                         |
| gene-MA16_Dca014760 | uncharacterized protein LOC110103117 [Dendrobium catenatum]                        |
| gene-MA16_Dca008963 | ARF guanine-nucleotide exchange factor GNOM-like [Dendrobium catenatum]            |
| gene-MA16_Dca017908 | probable trehalose-phosphate phosphatase 6 isoform X2 [Dendrobium catenatum]       |
| gene-MA16_Dca007955 | Protein ROOT HAIR DEFECTIVE 3 [Dendrobium catenatum]                               |
| gene-MA16_Dca002200 | hypothetical protein MA16_Dca002200 [Dendrobium catenatum]                         |
| gene-MA16_Dca004014 | Retrovirus-related Pol polyprotein from transposon TNT 1-94 [Dendrobium catenatum] |
| gene-MA16_Dca027485 | hypothetical protein MA16_Dca027485 [Dendrobium catenatum]                         |
| gene-MA16_Dca008845 | reticulon-like protein B2 [Dendrobium catenatum]                                   |
| gene-MA16_Dca001177 | dof zinc finger protein DOF5.7-like [Dendrobium catenatum]                         |
| gene-MA16_Dca024909 | Growth-regulating factor 5 [Dendrobium catenatum]                                  |
| gene-MA16_Dca009811 | Actin-depolymerizing factor 4 [Dendrobium catenatum]                               |
| gene-MA16_Dca001231 | Outer envelope pore protein 24, chloroplastic [Dendrobium catenatum]               |
| gene-MA16_Dca005762 | gibberellin 20-oxidase-like protein [Dendrobium catenatum]                         |
| gene-MA16_Dca019102 | Organic cation/carnitine transporter 2 [Dendrobium catenatum]                      |
| gene-MA16_Dca014665 | SNAP25 likeous protein SNAP33 [Dendrobium catenatum]                               |
| gene-MA16_Dca010245 | transcription factor TCP4-like [Dendrobium catenatum]                              |
| gene-MA16_Dca006555 | protein NRT1/ PTR FAMILY 5.8-like [Dendrobium catenatum]                           |
| gene-MA16_Dca019311 | rRNA-processing protein UTP23 homolog [Dendrobium catenatum]                       |
| gene-MA16_Dca016490 | hypothetical protein MA16_Dca016490 [Dendrobium catenatum]                         |
| gene-MA16_Dca006386 | probable serine/threonine-protein kinase At1g54610 [Dendrobium catenatum]          |
| gene-MA16_Dca003694 | serine carboxypeptidase-like 45 [Dendrobium catenatum]                             |
| gene-MA16_Dca009651 | uncharacterized protein LOC110115649 [Dendrobium catenatum]                        |
| gene-MA16_Dca022596 | L-gulonolactone oxidase 2-like [Dendrobium catenatum]                              |
| gene-MA16_Dca003304 | Retrovirus-related Pol polyprotein from transposon TNT 1-94 [Dendrobium catenatum] |
| gene-MA16_Dca009952 | DNA-damage-repair/toleration protein DRT100 [Dendrobium catenatum]                 |
| gene-MA16_Dca020860 | hypothetical protein MA16_Dca020860 [Dendrobium catenatum]                         |
| gene-MA16_Dca027407 | hypothetical protein MA16_Dca027407 [Dendrobium catenatum]                         |
| gene-MA16_Dca010827 | Aspartic proteinase Asp1 [Dendrobium catenatum]                                    |
| gene-MA16_Dca014237 | classical arabinogalactan protein 9-like [Dendrobium catenatum]                    |

|                     |                                                                              |
|---------------------|------------------------------------------------------------------------------|
| gene-MA16_Dca024947 | Formin-like protein 6 [Dendrobium catenatum]                                 |
| gene-MA16_Dca008993 | Isoflavone 2'-hydroxylase [Dendrobium catenatum]                             |
| gene-MA16_Dca010838 | putative zinc finger protein [Dendrobium catenatum]                          |
| gene-MA16_Dca013148 | hypothetical protein MA16_Dca013148 [Dendrobium catenatum]                   |
| gene-MA16_Dca005161 | syntaxin-32-like isoform X1 [Dendrobium catenatum]                           |
| gene-MA16_Dca016304 | 65-kDa microtubule-associated protein 7 [Dendrobium catenatum]               |
| gene-MA16_Dca008496 | Putative disease resistance protein RGA4 [Dendrobium catenatum]              |
| gene-MA16_Dca022302 | uncharacterized protein LOC110097256 [Dendrobium catenatum]                  |
| gene-MA16_Dca025299 | protein IQ-DOMAIN 32-like [Dendrobium catenatum]                             |
| gene-MA16_Dca014786 | uncharacterized protein LOC110095165 [Dendrobium catenatum]                  |
| gene-MA16_Dca027164 | pentatricopeptide repeat-containing protein At1g71490 [Dendrobium catenatum] |
| gene-MA16_Dca005596 | protein DETOXIFICATION 35 isoform X1 [Dendrobium catenatum]                  |
| gene-MA16_Dca015149 | protein transport protein SEC23-like [Dendrobium catenatum]                  |
| gene-MA16_Dca019307 | uncharacterized protein At1g04910-like isoform X2 [Dendrobium catenatum]     |
| gene-MA16_Dca002529 | binding partner of ACD11 1-like isoform X1 [Dendrobium catenatum]            |
| gene-MA16_Dca005305 | hypothetical protein MA16_Dca005305 [Dendrobium catenatum]                   |
| gene-MA16_Dca004093 | Mitogen-activated protein kinase kinase kinase 1 [Dendrobium catenatum]      |
| gene-MA16_Dca013209 | CCR4-NOT transcription complex subunit 1 isoform X1 [Dendrobium catenatum]   |
| gene-MA16_Dca025112 | hypothetical protein MA16_Dca025112 [Dendrobium catenatum]                   |
| gene-MA16_Dca010365 | Guanine nucleotide-binding protein subunit beta [Dendrobium catenatum]       |
| gene-MA16_Dca022320 | receptor-like protein kinase FERONIA [Dendrobium catenatum]                  |
| gene-MA16_Dca000787 | Serine/threonine-protein phosphatase 7 long form like [Dendrobium catenatum] |
| gene-MA16_Dca021624 | hypothetical protein MA16_Dca021624 [Dendrobium catenatum]                   |
| gene-MA16_Dca000146 | probable ethylene response sensor 1 [Dendrobium catenatum]                   |
| gene-MA16_Dca015539 | 40S ribosomal protein S6-like [Dendrobium catenatum]                         |
| gene-MA16_Dca015287 | transcription factor TCP4-like [Dendrobium catenatum]                        |
| gene-MA16_Dca000081 | hypothetical protein MA16_Dca000081 [Dendrobium catenatum]                   |
| gene-MA16_Dca005043 | probable WRKY transcription factor 70 isoform X2 [Dendrobium catenatum]      |
| gene-MA16_Dca002985 | hypothetical protein MA16_Dca002985 [Dendrobium catenatum]                   |
| gene-MA16_Dca017382 | hypothetical protein MA16_Dca017382 [Dendrobium catenatum]                   |

|                     |                                                                                             |
|---------------------|---------------------------------------------------------------------------------------------|
| gene-MA16_Dca007808 | Retrovirus-related Pol polyprotein from transposon TNT 1-94 [Dendrobium catenatum]          |
| gene-MA16_Dca015381 | uncharacterized protein LOC110101588 isoform X2 [Dendrobium catenatum]                      |
| gene-MA16_Dca008350 | probable protein phosphatase 2C 11 isoform X1 [Dendrobium catenatum]                        |
| gene-MA16_Dca009267 | hypothetical protein MA16_Dca009267 [Dendrobium catenatum]                                  |
| gene-MA16_Dca021423 | lysine-specific demethylase JMJ25 isoform X2 [Dendrobium catenatum]                         |
| gene-MA16_Dca023411 | Protein AIG1 [Dendrobium catenatum]                                                         |
| gene-MA16_Dca011928 | Retrovirus-related Pol polyprotein from transposon TNT 1-94 [Dendrobium catenatum]          |
| gene-MA16_Dca010093 | Protein AIG1 [Dendrobium catenatum]                                                         |
| gene-MA16_Dca028734 | uncharacterized protein LOC110097469 [Dendrobium catenatum]                                 |
| gene-MA16_Dca028117 | Retrovirus-related Pol polyprotein from transposon TNT 1-94 [Dendrobium catenatum]          |
| gene-MA16_Dca007395 | S-adenosylmethionine decarboxylase proenzyme [Dendrobium catenatum]                         |
| gene-MA16_Dca004056 | pentatricopeptide repeat-containing protein At1g11290, chloroplastic [Dendrobium catenatum] |
| gene-MA16_Dca003704 | translocon-associated protein subunit beta [Dendrobium catenatum]                           |
| gene-MA16_Dca010016 | hypothetical protein MA16_Dca010016 [Dendrobium catenatum]                                  |
| gene-MA16_Dca006179 | WAT1-related protein [Dendrobium catenatum]                                                 |
| gene-MA16_Dca000732 | serine/threonine-protein kinase HT1-like isoform X1 [Dendrobium catenatum]                  |
| gene-MA16_Dca023779 | UNC93-like protein 2 [Dendrobium catenatum]                                                 |
| gene-MA16_Dca001351 | Protein PRD1 [Dendrobium catenatum]                                                         |
| gene-MA16_Dca022880 | hypothetical protein MA16_Dca022880 [Dendrobium catenatum]                                  |
| gene-MA16_Dca012643 | Cation/calcium exchanger 1 [Dendrobium catenatum]                                           |
| gene-MA16_Dca005906 | 125 kDa kinesin-related protein [Dendrobium catenatum]                                      |
| gene-MA16_Dca014632 | probable cellulose synthase A catalytic subunit 5 [UDP-forming] [Dendrobium catenatum]      |
| gene-MA16_Dca009980 | transcriptional adapter ADA2-like [Dendrobium catenatum]                                    |
| gene-MA16_Dca006730 | protein RNA-directed DNA methylation 3 [Dendrobium catenatum]                               |
| gene-MA16_Dca002420 | CMP-sialic acid transporter 4 [Dendrobium catenatum]                                        |
| gene-MA16_Dca002388 | hypothetical protein MA16_Dca002388 [Dendrobium catenatum]                                  |
| gene-MA16_Dca017151 | Deoxyribodipyrimidine photo-lyase [Dendrobium catenatum]                                    |
| gene-MA16_Dca014284 | translocase of chloroplast 159, chloroplastic [Dendrobium catenatum]                        |
| gene-MA16_Dca020166 | WEB family protein At2g38370-like [Dendrobium catenatum]                                    |
| gene-MA16_Dca000685 | probable ubiquitin-conjugating enzyme E2 37 isoform X1 [Dendrobium catenatum]               |

|                     |                                                                                    |
|---------------------|------------------------------------------------------------------------------------|
| gene-MA16_Dca001826 | peroxidase 40 [Dendrobium catenatum]                                               |
| gene-MA16_Dca020372 | putative mitochondrial protein [Dendrobium catenatum]                              |
| gene-MA16_Dca010139 | mechanosensitive ion channel protein 6-like [Dendrobium catenatum]                 |
| gene-MA16_Dca022653 | putative mitochondrial protein [Dendrobium catenatum]                              |
| gene-MA16_Dca014225 | hypothetical protein MA16_Dca014225 [Dendrobium catenatum]                         |
| gene-MA16_Dca009935 | SNARE-interacting protein KEULE [Dendrobium catenatum]                             |
| gene-MA16_Dca002055 | hypothetical protein MA16_Dca002055 [Dendrobium catenatum]                         |
| gene-MA16_Dca021663 | pectinesterase-like [Dendrobium catenatum]                                         |
| gene-MA16_Dca021825 | Petal death protein [Dendrobium catenatum]                                         |
| gene-MA16_Dca027654 | hypothetical protein MA16_Dca027654 [Dendrobium catenatum]                         |
| gene-MA16_Dca024366 | hypothetical protein MA16_Dca024366 [Dendrobium catenatum]                         |
| gene-MA16_Dca000708 | Autophagy-related protein 8g [Dendrobium catenatum]                                |
| gene-MA16_Dca009642 | Retrovirus-related Pol polyprotein from transposon TNT 1-94 [Dendrobium catenatum] |
| gene-MA16_Dca018321 | hypothetical protein MA16_Dca018321 [Dendrobium catenatum]                         |
| gene-MA16_Dca020021 | mitogen-activated protein kinase kinase kinase 5-like [Dendrobium catenatum]       |
| gene-MA16_Dca009619 | hypothetical protein MA16_Dca009619 [Dendrobium catenatum]                         |
| gene-MA16_Dca020304 | probable purine permease 11 [Dendrobium catenatum]                                 |
| gene-MA16_Dca014769 | Retrovirus-related Pol polyprotein from transposon TNT 1-94 [Dendrobium catenatum] |
| gene-MA16_Dca014182 | UDP-glycosyltransferase 73C4 [Dendrobium catenatum]                                |
| gene-MA16_Dca023983 | aspartyl protease family protein 1-like isoform X1 [Dendrobium catenatum]          |
| gene-MA16_Dca002239 | Abscisic stress-ripening protein 1 [Dendrobium catenatum]                          |
| gene-MA16_Dca001711 | mannose-specific lectin 2-like [Dendrobium catenatum]                              |
| gene-MA16_Dca009629 | RING-H2 finger protein ATL80 [Dendrobium catenatum]                                |
| gene-MA16_Dca011166 | hypothetical protein MA16_Dca011166 [Dendrobium catenatum]                         |
| gene-MA16_Dca009386 | hypothetical protein MA16_Dca009386 [Dendrobium catenatum]                         |
| gene-MA16_Dca007509 | hypothetical protein MA16_Dca007509 [Dendrobium catenatum]                         |
| gene-MA16_Dca016099 | Eukaryotic translation initiation factor 5A-4 [Dendrobium catenatum]               |
| gene-MA16_Dca018835 | hypothetical protein MA16_Dca018835 [Dendrobium catenatum]                         |
| gene-MA16_Dca014311 | RNA-directed DNA polymerase [Dendrobium catenatum]                                 |
| gene-MA16_Dca002354 | stromal cell-derived factor 2-like protein [Dendrobium catenatum]                  |

|                     |                                                                                                                                                  |
|---------------------|--------------------------------------------------------------------------------------------------------------------------------------------------|
| gene-MA16_Dca014211 | hypothetical protein MA16_Dca014211 [Dendrobium catenatum]                                                                                       |
| gene-MA16_Dca018562 | transcription factor MYB44-like [Dendrobium catenatum]                                                                                           |
| gene-MA16_Dca026102 | Starch synthase 1, chloroplastic/amyloplastic [Dendrobium catenatum]                                                                             |
| gene-MA16_Dca006432 | galactoside 2-alpha-L-fucosyltransferase-like [Dendrobium catenatum]                                                                             |
| gene-MA16_Dca002323 | Piriformospora indica-insensitive protein 2 [Dendrobium catenatum]                                                                               |
| gene-MA16_Dca012960 | pectinesterase-like [Dendrobium catenatum]                                                                                                       |
| gene-MA16_Dca001986 | pentatricopeptide repeat-containing protein At2g27800, mitochondrial [Dendrobium catenatum]                                                      |
| gene-MA16_Dca026603 | hypothetical protein MA16_Dca026603 [Dendrobium catenatum]                                                                                       |
| gene-MA16_Dca007071 | hypothetical protein MA16_Dca007071 [Dendrobium catenatum]                                                                                       |
| gene-MA16_Dca019591 | probable protein phosphatase 2C 12 [Dendrobium catenatum]                                                                                        |
| gene-MA16_Dca018434 | hypothetical protein MA16_Dca018434 [Dendrobium catenatum]                                                                                       |
| gene-MA16_Dca007765 | uncharacterized protein LOC110093255 [Dendrobium catenatum]                                                                                      |
| gene-MA16_Dca012903 | hypothetical protein MA16_Dca012903 [Dendrobium catenatum]                                                                                       |
| gene-MA16_Dca028951 | hypothetical protein MA16_Dca028951 [Dendrobium catenatum]                                                                                       |
| gene-MA16_Dca005171 | Transcription factor GAMYB [Dendrobium catenatum]                                                                                                |
| gene-MA16_Dca006711 | checkpoint serine/threonine-protein kinase [Dendrobium catenatum]                                                                                |
| gene-MA16_Dca014967 | Protein FAR1-RELATED SEQUENCE 5 [Dendrobium catenatum]                                                                                           |
| gene-MA16_Dca018364 | protein gamma response 1 isoform X1 [Dendrobium catenatum]                                                                                       |
| gene-MA16_Dca013757 | hypothetical protein MA16_Dca013757 [Dendrobium catenatum]                                                                                       |
| gene-MA16_Dca025628 | hypothetical protein MA16_Dca025628 [Dendrobium catenatum]                                                                                       |
| gene-MA16_Dca014797 | ER membrane protein complex subunit 1 isoform X1 [Dendrobium catenatum]                                                                          |
| gene-MA16_Dca005159 | NAD-dependent protein deacetylase SRT1 isoform X1 [Dendrobium catenatum]                                                                         |
| gene-MA16_Dca021950 | Mitogen-activated protein kinase kinase kinase YODA [Dendrobium catenatum]                                                                       |
| gene-MA16_Dca024245 | trifunctional UDP-glucose 4,6-dehydratase/UDP-4-keto-6-deoxy-D-glucose 3,5-epimerase/UDP-4-keto-L-rhamnose-reductase RHM1 [Dendrobium catenatum] |
| gene-MA16_Dca025306 | Putative ribonuclease H protein [Dendrobium catenatum]                                                                                           |
| gene-MA16_Dca006187 | ATP-dependent helicase BRM isoform X1 [Dendrobium catenatum]                                                                                     |
| gene-MA16_Dca008491 | Flavonoid 3'-monooxygenase [Dendrobium catenatum]                                                                                                |
| gene-MA16_Dca014143 | actin-related protein 2/3 complex subunit 1B-like [Dendrobium catenatum]                                                                         |
| gene-MA16_Dca002786 | hypothetical protein MA16_Dca002786 [Dendrobium catenatum]                                                                                       |

|                     |                                                                                           |
|---------------------|-------------------------------------------------------------------------------------------|
| gene-MA16_Dca001647 | LRR receptor-like serine/threonine-protein kinase FEI 1 isoform X1 [Dendrobium catenatum] |
| gene-MA16_Dca028203 | hypothetical protein MA16_Dca028203 [Dendrobium catenatum]                                |
| gene-MA16_Dca006426 | bZIP transcription factor TRAB1-like [Dendrobium catenatum]                               |
| gene-MA16_Dca016487 | Callose synthase 2 [Dendrobium catenatum]                                                 |
| gene-MA16_Dca011344 | hypothetical protein MA16_Dca011344 [Dendrobium catenatum]                                |
| gene-MA16_Dca003622 | uncharacterized protein LOC110097182 [Dendrobium catenatum]                               |
| gene-MA16_Dca020607 | hypothetical protein MA16_Dca020607 [Dendrobium catenatum]                                |
| gene-MA16_Dca026755 | Polypyrimidine tract-binding protein like 2 [Dendrobium catenatum]                        |
| gene-MA16_Dca008618 | hypothetical protein MA16_Dca008618 [Dendrobium catenatum]                                |
| gene-MA16_Dca009185 | uncharacterized protein LOC110115467 [Dendrobium catenatum]                               |
| gene-MA16_Dca000436 | pentatricopeptide repeat-containing protein At4g39530-like [Dendrobium catenatum]         |
| gene-MA16_Dca009990 | brefeldin A-inhibited guanine nucleotide-exchange protein 1 [Dendrobium catenatum]        |
| gene-MA16_Dca027333 | hypothetical protein MA16_Dca027333 [Dendrobium catenatum]                                |
| gene-MA16_Dca003098 | lysine-specific demethylase 3 [Dendrobium catenatum]                                      |
| gene-MA16_Dca007933 | Alpha,alpha-trehalose-phosphate synthase [UDP-forming] 6 [Dendrobium catenatum]           |
| gene-MA16_Dca008028 | uncharacterized protein LOC110111681 [Dendrobium catenatum]                               |
| gene-MA16_Dca003280 | chitinase 2-like isoform X1 [Dendrobium catenatum]                                        |
| gene-MA16_Dca027889 | hypothetical protein MA16_Dca027889 [Dendrobium catenatum]                                |
| gene-MA16_Dca007177 | glycerophosphodiester phosphodiesterase GDPDL4-like [Dendrobium catenatum]                |
| gene-MA16_Dca009036 | auxin response factor 18-like [Dendrobium catenatum]                                      |
| gene-MA16_Dca006620 | Phytochromobilin:ferredoxin oxidoreductase, chloroplastic [Dendrobium catenatum]          |
| gene-MA16_Dca022454 | Receptor-like serine/threonine-protein kinase SD1-6 [Dendrobium catenatum]                |
| gene-MA16_Dca012689 | Protein FAR1-RELATED SEQUENCE 5 [Dendrobium catenatum]                                    |
| gene-MA16_Dca014504 | Indole-3-acetic acid-amido synthetase GH3.17 [Dendrobium catenatum]                       |
| gene-MA16_Dca018053 | WAT1-related protein At5g47470-like isoform X1 [Dendrobium catenatum]                     |
| gene-MA16_Dca021414 | probable serine/threonine-protein kinase WNK9 isoform X2 [Dendrobium catenatum]           |
| gene-MA16_Dca020018 | hypothetical protein MA16_Dca020018 [Dendrobium catenatum]                                |
| gene-MA16_Dca023125 | putative mannan endo-1,4-beta-mannosidase 9 [Dendrobium catenatum]                        |
| gene-MA16_Dca005077 | hypothetical protein MA16_Dca005077 [Dendrobium catenatum]                                |
| gene-MA16_Dca019179 | uncharacterized protein LOC110093585 [Dendrobium catenatum]                               |



|                     |                                                                                             |
|---------------------|---------------------------------------------------------------------------------------------|
| gene-MA16_Dca013703 | probable ubiquitin-like-specific protease 2B [Dendrobium catenatum]                         |
| gene-MA16_Dca014784 | 3-ketoacyl-CoA synthase 11-like [Dendrobium catenatum]                                      |
| gene-MA16_Dca024999 | Uncharacterized protein MA16_Dca024999 [Dendrobium catenatum]                               |
| gene-MA16_Dca004322 | hypothetical protein MA16_Dca004322 [Dendrobium catenatum]                                  |
| gene-MA16_Dca006051 | Transcription factor TCP2 [Dendrobium catenatum]                                            |
| gene-MA16_Dca021724 | hypothetical protein MA16_Dca021724 [Dendrobium catenatum]                                  |
| gene-MA16_Dca001366 | hypothetical protein MA16_Dca001366 [Dendrobium catenatum]                                  |
| gene-MA16_Dca005617 | DEAD-box ATP-dependent RNA helicase 3, chloroplastic [Dendrobium catenatum]                 |
| gene-MA16_Dca020825 | ribosomal RNA methyltransferase Nop2 [Dendrobium catenatum]                                 |
| gene-MA16_Dca015726 | pentatricopeptide repeat-containing protein At1g71460, chloroplastic [Dendrobium catenatum] |
| gene-MA16_Dca015909 | regulatory-associated protein of TOR 2 isoform X2 [Dendrobium catenatum]                    |
| gene-MA16_Dca014413 | hypothetical protein MA16_Dca014413 [Dendrobium catenatum]                                  |
| gene-MA16_Dca014018 | Cytochrome P450 78A4 [Dendrobium catenatum]                                                 |
| gene-MA16_Dca027817 | acylaminoacyl-peptidase [Dendrobium catenatum]                                              |
| gene-MA16_Dca016652 | Protein HASTY 1 [Dendrobium catenatum]                                                      |
| gene-MA16_Dca015353 | Nodulation-signaling pathway 2 protein [Dendrobium catenatum]                               |
| gene-MA16_Dca008843 | late embryogenesis abundant protein At1g64065-like [Dendrobium catenatum]                   |
| gene-MA16_Dca021085 | beta-glucosidase 1-like [Dendrobium catenatum]                                              |
| gene-MA16_Dca019111 | hypothetical protein MA16_Dca019111 [Dendrobium catenatum]                                  |
| gene-MA16_Dca011522 | hypothetical protein MA16_Dca011522 [Dendrobium catenatum]                                  |
| gene-MA16_Dca010045 | Retrovirus-related Pol polyprotein from transposon TNT 1-94 [Dendrobium catenatum]          |
| gene-MA16_Dca008955 | Polyadenylate-binding protein 2 [Dendrobium catenatum]                                      |
| gene-MA16_Dca015196 | Mediator of RNA polymerase II transcription subunit 15a [Dendrobium catenatum]              |
| gene-MA16_Dca015008 | myosin-10 [Dendrobium catenatum]                                                            |
| gene-MA16_Dca007252 | serine carboxypeptidase-like 27 [Dendrobium catenatum]                                      |
| gene-MA16_Dca021760 | pentatricopeptide repeat-containing protein At5g18475-like [Dendrobium catenatum]           |
| gene-MA16_Dca001555 | Disease resistance protein RGA2 [Dendrobium catenatum]                                      |
| gene-MA16_Dca002934 | ethylene-overproduction protein 1 [Dendrobium catenatum]                                    |
| gene-MA16_Dca001955 | transaldolase [Dendrobium catenatum]                                                        |
| gene-MA16_Dca024373 | hypothetical protein MA16_Dca024373 [Dendrobium catenatum]                                  |

|                     |                                                                                        |
|---------------------|----------------------------------------------------------------------------------------|
| gene-MA16_Dca012780 | Formin-like protein 5 [Dendrobium catenatum]                                           |
| gene-MA16_Dca005927 | hypothetical protein MA16_Dca005927 [Dendrobium catenatum]                             |
| gene-MA16_Dca014937 | hypothetical protein MA16_Dca029169 [Dendrobium catenatum]                             |
| gene-MA16_Dca001387 | hypothetical protein MA16_Dca001387 [Dendrobium catenatum]                             |
| gene-MA16_Dca015293 | hypothetical protein MA16_Dca015293 [Dendrobium catenatum]                             |
| gene-MA16_Dca005799 | serine/threonine-protein kinase RIPK-like [Dendrobium catenatum]                       |
| gene-MA16_Dca001114 | hypothetical protein MA16_Dca001114 [Dendrobium catenatum]                             |
| gene-MA16_Dca016309 | probable transcription factor RL9 isoform X1 [Dendrobium catenatum]                    |
| gene-MA16_Dca011426 | scarecrow-like protein 9 [Dendrobium catenatum]                                        |
| gene-MA16_Dca009793 | uncharacterized protein LOC110092030 isoform X2 [Dendrobium catenatum]                 |
| gene-MA16_Dca007731 | hypothetical protein MA16_Dca007731 [Dendrobium catenatum]                             |
| gene-MA16_Dca008798 | calcium-dependent protein kinase 29-like [Dendrobium catenatum]                        |
| gene-MA16_Dca007682 | pentatricopeptide repeat-containing protein At4g17616 [Dendrobium catenatum]           |
| gene-MA16_Dca016237 | hypothetical protein MA16_Dca016237 [Dendrobium catenatum]                             |
| gene-MA16_Dca014863 | hypothetical protein MA16_Dca014863 [Dendrobium catenatum]                             |
| gene-MA16_Dca021441 | hypothetical protein MA16_Dca021441 [Dendrobium catenatum]                             |
| gene-MA16_Dca004503 | Regulator of nonsense transcripts 1 like [Dendrobium catenatum]                        |
| gene-MA16_Dca003585 | putative cellulose synthase A catalytic subunit 8 [UDP-forming] [Dendrobium catenatum] |
| gene-MA16_Dca014181 | UDP-glycosyltransferase 73D1-like [Dendrobium catenatum]                               |
| gene-MA16_Dca005521 | UDP-glucose 4-epimerase GEPI48-like [Dendrobium catenatum]                             |
| gene-MA16_Dca009572 | MATE efflux family protein 3, chloroplastic [Dendrobium catenatum]                     |
| gene-MA16_Dca010939 | uncharacterized protein LOC110116329 isoform X2 [Dendrobium catenatum]                 |
| gene-MA16_Dca024707 | polygalacturonate 4-alpha-galacturonosyltransferase-like [Dendrobium catenatum]        |
| gene-MA16_Dca021050 | C2 and GRAM domain-containing protein At1g03370 [Dendrobium catenatum]                 |
| gene-MA16_Dca019405 | Protein argonaute 1B [Dendrobium catenatum]                                            |
| gene-MA16_Dca019042 | hypothetical protein MA16_Dca019042 [Dendrobium catenatum]                             |
| gene-MA16_Dca022532 | protein RRP6-like 3 isoform X1 [Dendrobium catenatum]                                  |
| gene-MA16_Dca026583 | cytochrome P450 71A1-like [Dendrobium catenatum]                                       |
| gene-MA16_Dca027910 | hypothetical protein MA16_Dca027910 [Dendrobium catenatum]                             |
| gene-MA16_Dca000603 | Myb family transcription factor APL [Dendrobium catenatum]                             |

|                     |                                                                                          |
|---------------------|------------------------------------------------------------------------------------------|
| gene-MA16_Dca026857 | hypothetical protein MA16_Dca026857 [Dendrobium catenatum]                               |
| gene-MA16_Dca010603 | transcription factor MYB97-like [Dendrobium catenatum]                                   |
| gene-MA16_Dca025598 | hypothetical protein MA16_Dca025598 [Dendrobium catenatum]                               |
| gene-MA16_Dca016370 | L-type lectin-domain containing receptor kinase IX.1-like [Dendrobium catenatum]         |
| gene-MA16_Dca008399 | putative phospholipid-transporting ATPase 9 isoform X1 [Dendrobium catenatum]            |
| gene-MA16_Dca023953 | hypothetical protein MA16_Dca023953 [Dendrobium catenatum]                               |
| gene-MA16_Dca017780 | MLO-like protein 8 [Dendrobium catenatum]                                                |
| gene-MA16_Dca013776 | Pentatricopeptide repeat-containing protein [Dendrobium catenatum]                       |
| gene-MA16_Dca006650 | E3 ubiquitin-protein ligase PUB23-like [Dendrobium catenatum]                            |
| gene-MA16_Dca016049 | AP2-like ethylene-responsive transcription factor TOE3 isoform X1 [Dendrobium catenatum] |
| gene-MA16_Dca001025 | probable prefoldin subunit 2 [Dendrobium catenatum]                                      |
| gene-MA16_Dca002488 | Putative E3 ubiquitin-protein ligase XBAT34 [Dendrobium catenatum]                       |
| gene-MA16_Dca008335 | Lysine-specific demethylase REF6 [Dendrobium catenatum]                                  |
| gene-MA16_Dca024342 | KH domain-containing protein SPIN1 [Dendrobium catenatum]                                |
| gene-MA16_Dca025479 | Putative ribonuclease H protein [Dendrobium catenatum]                                   |
| gene-MA16_Dca027456 | ATP-dependent DNA helicase RecG [Dendrobium catenatum]                                   |
| gene-MA16_Dca020570 | E3 ubiquitin-protein ligase ATL4-like [Dendrobium catenatum]                             |
| gene-MA16_Dca001523 | Transcription factor ILR3 [Dendrobium catenatum]                                         |
| gene-MA16_Dca011122 | PsbB mRNA maturation factor Mbb1, chloroplastic [Dendrobium catenatum]                   |
| gene-MA16_Dca006661 | hypothetical protein MA16_Dca006661 [Dendrobium catenatum]                               |
| gene-MA16_Dca012769 | Vacuolar cation/proton exchanger 1a [Dendrobium catenatum]                               |
| gene-MA16_Dca015496 | UPF0481 protein At3g47200-like [Dendrobium catenatum]                                    |
| gene-MA16_Dca020556 | E3 ubiquitin-protein ligase ATL4-like [Dendrobium catenatum]                             |
| gene-MA16_Dca000383 | protein ELF4-LIKE 3-like isoform X2 [Dendrobium catenatum]                               |
| gene-MA16_Dca003396 | RNA-binding protein 39-like [Dendrobium catenatum]                                       |
| gene-MA16_Dca023030 | hypothetical protein MA16_Dca023030 [Dendrobium catenatum]                               |
| gene-MA16_Dca004818 | hypothetical protein MA16_Dca004818 [Dendrobium catenatum]                               |
| gene-MA16_Dca024281 | exocyst complex component EXO70A1-like [Dendrobium catenatum]                            |
| gene-MA16_Dca026312 | Putative disease resistance protein RGA4 [Dendrobium catenatum]                          |
| gene-MA16_Dca020179 | hypothetical protein MA16_Dca020179 [Dendrobium catenatum]                               |

|                     |                                                                                                  |
|---------------------|--------------------------------------------------------------------------------------------------|
| gene-MA16_Dca024504 | Serine/threonine-protein kinase KIPK [Dendrobium catenatum]                                      |
| gene-MA16_Dca016271 | hypothetical protein MA16_Dca016271 [Dendrobium catenatum]                                       |
| gene-MA16_Dca008889 | hypothetical protein MA16_Dca008889 [Dendrobium catenatum]                                       |
| gene-MA16_Dca023559 | catenatum]                                                                                       |
| gene-MA16_Dca005216 | pentatricopeptide repeat-containing protein At1g77360, mitochondrial-like [Dendrobium catenatum] |
| gene-MA16_Dca023726 | hypothetical protein MA16_Dca023726 [Dendrobium catenatum]                                       |
| gene-MA16_Dca028508 | Short-chain dehydrogenase TIC 32, chloroplastic [Dendrobium catenatum]                           |
| gene-MA16_Dca011125 | cysteine-rich receptor-like protein kinase 42 [Dendrobium catenatum]                             |
| gene-MA16_Dca016354 | Phosphopantothenate--cysteine ligase 2 [Dendrobium catenatum]                                    |
| gene-MA16_Dca011276 | two-component response regulator-like PRR95 isoform X1 [Dendrobium catenatum]                    |
| gene-MA16_Dca010402 | basic leucine zipper 19-like [Dendrobium catenatum]                                              |
| gene-MA16_Dca004453 | pectin acylesterase 10-like isoform X1 [Dendrobium catenatum]                                    |
| gene-MA16_Dca006410 | receptor-like protein kinase HERK 1 [Dendrobium catenatum]                                       |
| gene-MA16_Dca015291 | Taxadien-5-alpha-ol O-acetyltransferase [Dendrobium catenatum]                                   |
| gene-MA16_Dca007882 | uncharacterized protein LOC110106019 isoform X1 [Dendrobium catenatum]                           |
| gene-MA16_Dca016284 | hypothetical protein MA16_Dca016284 [Dendrobium catenatum]                                       |
| gene-MA16_Dca015838 | Triacylglycerol lipase 2 [Dendrobium catenatum]                                                  |
| gene-MA16_Dca006235 | hypothetical protein MA16_Dca006235 [Dendrobium catenatum]                                       |
| gene-MA16_Dca002971 | hypothetical protein MA16_Dca002971 [Dendrobium catenatum]                                       |
| gene-MA16_Dca004658 | Polyadenylate-binding protein 5 [Dendrobium catenatum]                                           |
| gene-MA16_Dca004718 | hypothetical protein MA16_Dca004718 [Dendrobium catenatum]                                       |
| gene-MA16_Dca022451 | receptor-like serine/threonine-protein kinase SD1-8 isoform X1 [Dendrobium catenatum]            |
| gene-MA16_Dca007981 | transcription termination factor MTERF4, chloroplastic-like [Dendrobium catenatum]               |
| gene-MA16_Dca017513 | hypothetical protein MA16_Dca017513 [Dendrobium catenatum]                                       |
| gene-MA16_Dca001444 | Retrovirus-related Pol polyprotein from transposon TNT 1-94 [Dendrobium catenatum]               |
| gene-MA16_Dca014794 | Uncharacterized protein ycf56 [Dendrobium catenatum]                                             |
| gene-MA16_Dca022316 | hypothetical protein MA16_Dca022316 [Dendrobium catenatum]                                       |
| gene-MA16_Dca019609 | Vacuolar protein sorting-associated protein 35A [Dendrobium catenatum]                           |
| gene-MA16_Dca023499 | G-type lectin S-receptor-like serine/threonine-protein kinase RLK1 [Dendrobium catenatum]        |
| gene-MA16_Dca025804 | hypothetical protein MA16_Dca025804 [Dendrobium catenatum]                                       |

|                     |                                                                                             |
|---------------------|---------------------------------------------------------------------------------------------|
| gene-MA16_Dca004622 | Retrovirus-related Pol polyprotein from transposon TNT 1-94 [Dendrobium catenatum]          |
| gene-MA16_Dca003816 | catenatum]                                                                                  |
| gene-MA16_Dca016956 | Cytokinin riboside 5'-monophosphate phosphoribohydrolase LOG8 [Dendrobium catenatum]        |
| gene-MA16_Dca012782 | uncharacterized protein LOC110103512 [Dendrobium catenatum]                                 |
| gene-MA16_Dca010563 | succinate-semialdehyde dehydrogenase, mitochondrial isoform X1 [Dendrobium catenatum]       |
| gene-MA16_Dca026802 | ras-related protein RABF1 [Dendrobium catenatum]                                            |
| gene-MA16_Dca009002 | alkylated DNA repair protein alkB 5 [Dendrobium catenatum]                                  |
| gene-MA16_Dca008528 | hypothetical protein MA16_Dca008528 [Dendrobium catenatum]                                  |
| gene-MA16_Dca017188 | transcription factor RAX2-like [Dendrobium catenatum]                                       |
| gene-MA16_Dca017950 | hypothetical protein MA16_Dca017950 [Dendrobium catenatum]                                  |
| gene-MA16_Dca013441 | hypothetical protein MA16_Dca013441 [Dendrobium catenatum]                                  |
| gene-MA16_Dca002864 | hypothetical protein MA16_Dca002864 [Dendrobium catenatum]                                  |
| gene-MA16_Dca015837 | hypothetical protein MA16_Dca015837 [Dendrobium catenatum]                                  |
| gene-MA16_Dca024325 | uncharacterized protein LOC110102882 [Dendrobium catenatum]                                 |
| gene-MA16_Dca003347 | pentatricopeptide repeat-containing protein At1g03100, mitochondrial [Dendrobium catenatum] |
| gene-MA16_Dca024902 | hypothetical protein MA16_Dca024902 [Dendrobium catenatum]                                  |
| gene-MA16_Dca028588 | agamous-like MADS-box protein AGL65 [Dendrobium catenatum]                                  |
| gene-MA16_Dca002338 | hypothetical protein MA16_Dca002338 [Dendrobium catenatum]                                  |
| gene-MA16_Dca002218 | Protein ASPARTIC PROTEASE IN GUARD CELL 2 [Dendrobium catenatum]                            |
| gene-MA16_Dca002355 | DNA mismatch repair protein MSH6 [Dendrobium catenatum]                                     |
| gene-MA16_Dca019383 | hypothetical protein MA16_Dca019383 [Dendrobium catenatum]                                  |
| gene-MA16_Dca012946 | hypothetical protein MA16_Dca012946 [Dendrobium catenatum]                                  |
| gene-MA16_Dca025511 | Sulfate transporter 2.1 [Dendrobium catenatum]                                              |
| gene-MA16_Dca000737 | hypothetical protein MA16_Dca000737 [Dendrobium catenatum]                                  |
| gene-MA16_Dca028471 | Retrovirus-related Pol polyprotein from transposon TNT 1-94 [Dendrobium catenatum]          |
| gene-MA16_Dca021334 | hypothetical protein MA16_Dca021334 [Dendrobium catenatum]                                  |
| gene-MA16_Dca021158 | Clustered mitochondria protein [Dendrobium catenatum]                                       |
| gene-MA16_Dca009910 | uncharacterized protein LOC110113468 isoform X1 [Dendrobium catenatum]                      |
| gene-MA16_Dca023610 | hypothetical protein MA16_Dca023610 [Dendrobium catenatum]                                  |
| gene-MA16_Dca028489 | hypothetical protein MA16_Dca028489 [Dendrobium catenatum]                                  |

|                     |                                                                                                           |
|---------------------|-----------------------------------------------------------------------------------------------------------|
| gene-MA16_Dca018212 | Cell cycle checkpoint protein RAD17 [Dendrobium catenatum]                                                |
| gene-MA16_Dca010165 | pentatricopeptide repeat-containing protein At4g33170 isoform X1 [Dendrobium catenatum]                   |
| gene-MA16_Dca022005 | putative mitochondrial protein [Dendrobium catenatum]                                                     |
| gene-MA16_Dca022181 | asparagine--tRNA ligase, cytoplasmic 3-like [Dendrobium catenatum]                                        |
| gene-MA16_Dca002377 | auxin transport protein BIG [Dendrobium catenatum]                                                        |
| gene-MA16_Dca005798 | transcription initiation factor TFIID subunit 9 [Dendrobium catenatum]                                    |
| gene-MA16_Dca015824 | hypothetical protein MA16_Dca015824 [Dendrobium catenatum]                                                |
| gene-MA16_Dca019243 | hypothetical protein MA16_Dca019243 [Dendrobium catenatum]                                                |
| gene-MA16_Dca025577 | uncharacterized protein LOC110099282 [Dendrobium catenatum]                                               |
| gene-MA16_Dca021763 | cysteine-rich receptor-like protein kinase 15 [Dendrobium catenatum]                                      |
| gene-MA16_Dca026790 | Protein PAIR1 [Dendrobium catenatum]                                                                      |
| gene-MA16_Dca019261 | exopolysaccharuronase-like [Dendrobium catenatum]                                                         |
| gene-MA16_Dca027012 | IAA-alanine resistance protein 1 [Dendrobium catenatum]                                                   |
| gene-MA16_Dca009003 | uncharacterized protein LOC110097447 [Dendrobium catenatum]                                               |
| gene-MA16_Dca012661 | hypothetical protein MA16_Dca012661 [Dendrobium catenatum]                                                |
| gene-MA16_Dca004361 | hypothetical protein MA16_Dca004361 [Dendrobium catenatum]                                                |
| gene-MA16_Dca012983 | uncharacterized protein LOC110107094 [Dendrobium catenatum]                                               |
| gene-MA16_Dca003651 | ribonuclease P protein subunit p29 [Dendrobium catenatum]                                                 |
| gene-MA16_Dca020115 | putative ADP-ribosylation factor GTPase-activating protein AGD11 [Dendrobium catenatum]                   |
| gene-MA16_Dca026047 | hypothetical protein MA16_Dca026047 [Dendrobium catenatum]                                                |
| gene-MA16_Dca003966 | uncharacterized protein LOC110107815 [Dendrobium catenatum]                                               |
| gene-MA16_Dca014606 | Ribose-phosphate pyrophosphokinase 1 [Dendrobium catenatum]                                               |
| gene-MA16_Dca026042 | hypothetical protein MA16_Dca026042 [Dendrobium catenatum]                                                |
| gene-MA16_Dca014741 | transmembrane 9 superfamily member 8-like [Dendrobium catenatum]                                          |
| gene-MA16_Dca024861 | uncharacterized protein LOC110093686 [Dendrobium catenatum]                                               |
| gene-MA16_Dca010817 | putative 1-phosphatidylinositol-3-phosphate 5-kinase FAB1D isoform X1 [Dendrobium catenatum]              |
| gene-MA16_Dca026020 | uncharacterized protein LOC110094125 [Dendrobium catenatum]                                               |
| gene-MA16_Dca012526 | UPF0481 protein [Dendrobium catenatum]                                                                    |
| gene-MA16_Dca022453 | G-type lectin S-receptor-like serine/threonine-protein kinase At4g27290 isoform X1 [Dendrobium catenatum] |
| gene-MA16_Dca020801 | pentatricopeptide repeat-containing protein At5g04780-like [Dendrobium catenatum]                         |

|                     |                                                                                            |
|---------------------|--------------------------------------------------------------------------------------------|
| gene-MA16_Dca000868 | RNA exonuclease 1 [Dendrobium catenatum]                                                   |
| gene-MA16_Dca026137 | hypothetical protein MA16_Dca026137 [Dendrobium catenatum]                                 |
| gene-MA16_Dca010133 | uncharacterized protein LOC110099129 isoform X7 [Dendrobium catenatum]                     |
| gene-MA16_Dca014260 | xylose isomerase isoform X1 [Dendrobium catenatum]                                         |
| gene-MA16_Dca021652 | hypothetical protein MA16_Dca021652 [Dendrobium catenatum]                                 |
| gene-MA16_Dca025512 | hypothetical protein MA16_Dca025512 [Dendrobium catenatum]                                 |
| gene-MA16_Dca002797 | hypothetical protein MA16_Dca002797 [Dendrobium catenatum]                                 |
| gene-MA16_Dca022493 | hypothetical protein MA16_Dca022493 [Dendrobium catenatum]                                 |
| gene-MA16_Dca001785 | hypothetical protein MA16_Dca001785 [Dendrobium catenatum]                                 |
| gene-MA16_Dca026823 | hypothetical protein MA16_Dca026823 [Dendrobium catenatum]                                 |
| gene-MA16_Dca025486 | hypothetical protein MA16_Dca025486 [Dendrobium catenatum]                                 |
| gene-MA16_Dca012128 | hypothetical protein MA16_Dca012128 [Dendrobium catenatum]                                 |
| gene-MA16_Dca022152 | FACT complex subunit SPT16 [Dendrobium catenatum]                                          |
| gene-MA16_Dca007413 | Protein ROOT HAIR DEFECTIVE 3 [Dendrobium catenatum]                                       |
| gene-MA16_Dca023746 | receptor protein kinase-like protein ZAR1 [Dendrobium catenatum]                           |
| gene-MA16_Dca012099 | ATP-dependent RNA helicase DEAH11, chloroplastic-like [Dendrobium catenatum]               |
| gene-MA16_Dca017781 | uncharacterized protein LOC110095018 [Dendrobium catenatum]                                |
| gene-MA16_Dca010665 | formyltetrahydrofolate deformylase 2, mitochondrial-like isoform X1 [Dendrobium catenatum] |
| gene-MA16_Dca028626 | DNA-directed RNA polymerase II subunit RPB7 [Dendrobium catenatum]                         |
| gene-MA16_Dca023590 | scarecrow-like protein 15 [Dendrobium catenatum]                                           |
| gene-MA16_Dca000364 | Callose synthase 12 [Dendrobium catenatum]                                                 |
| gene-MA16_Dca013024 | CRM-domain containing factor CFM3, chloroplastic/mitochondrial [Dendrobium catenatum]      |
| gene-MA16_Dca018137 | probable WRKY transcription factor 3 [Dendrobium catenatum]                                |
| gene-MA16_Dca003521 | uncharacterized protein LOC110107998 [Dendrobium catenatum]                                |
| gene-MA16_Dca015366 | hypothetical protein MA16_Dca015366 [Dendrobium catenatum]                                 |
| gene-MA16_Dca007646 | Uncharacterized protein MA16_Dca007646 [Dendrobium catenatum]                              |
| gene-MA16_Dca008388 | putative beta-1,3-galactosyltransferase 8 [Dendrobium catenatum]                           |
| gene-MA16_Dca005251 | Putative disease resistance protein RGA3 [Dendrobium catenatum]                            |
| gene-MA16_Dca013418 | Protein disulfide-isomerase 5-4 [Dendrobium catenatum]                                     |
| gene-MA16_Dca010207 | Chaperone protein dnaJ 15 [Dendrobium catenatum]                                           |

|                     |                                                                                                             |
|---------------------|-------------------------------------------------------------------------------------------------------------|
| gene-MA16_Dca025275 | hypothetical protein MA16_Dca025275 [Dendrobium catenatum]                                                  |
| gene-MA16_Dca021697 | S-acyltransferase TIP1 [Dendrobium catenatum]                                                               |
| gene-MA16_Dca005680 | hypothetical protein MA16_Dca005680 [Dendrobium catenatum]                                                  |
| gene-MA16_Dca008911 | Zinc finger protein MAGPIE [Dendrobium catenatum]                                                           |
| gene-MA16_Dca018536 | uncharacterized protein LOC110093328 [Dendrobium catenatum]                                                 |
| gene-MA16_Dca004270 | Protein ASPARTIC PROTEASE IN GUARD CELL 2 [Dendrobium catenatum]                                            |
| gene-MA16_Dca002623 | CSC1-like protein ERD4 [Dendrobium catenatum]                                                               |
| gene-MA16_Dca016851 | Retrovirus-related Pol polyprotein from transposon TNT 1-94 [Dendrobium catenatum]                          |
| gene-MA16_Dca011481 | uncharacterized protein LOC110112922 [Dendrobium catenatum]                                                 |
| gene-MA16_Dca006703 | hypothetical protein MA16_Dca006703 [Dendrobium catenatum]                                                  |
| gene-MA16_Dca011847 | pentatricopeptide repeat-containing protein At3g53360, mitochondrial-like isoform X1 [Dendrobium catenatum] |
| gene-MA16_Dca008436 | Putative disease resistance RPP13-like protein 1 [Dendrobium catenatum]                                     |
| gene-MA16_Dca012388 | Putative ribonuclease H protein [Dendrobium catenatum]                                                      |
| gene-MA16_Dca020254 | probable histidine kinase 2 [Dendrobium catenatum]                                                          |
| gene-MA16_Dca024943 | hypothetical protein MA16_Dca024943 [Dendrobium catenatum]                                                  |
| gene-MA16_Dca015720 | receptor protein kinase-like protein ZAR1 [Dendrobium catenatum]                                            |
| gene-MA16_Dca024748 | plant intracellular Ras-group-related LRR protein 4-like isoform X2 [Dendrobium catenatum]                  |
| gene-MA16_Dca022241 | Beta-hexosaminidase 3 [Dendrobium catenatum]                                                                |
| gene-MA16_Dca024735 | hypothetical protein MA16_Dca024735 [Dendrobium catenatum]                                                  |
| gene-MA16_Dca008592 | hypothetical protein MA16_Dca008592 [Dendrobium catenatum]                                                  |
| gene-MA16_Dca024638 | Fimbrin-like protein 2 [Dendrobium catenatum]                                                               |
| gene-MA16_Dca008310 | Chaperonin CPN60-2, mitochondrial [Dendrobium catenatum]                                                    |
| gene-MA16_Dca015855 | probable histidine kinase 3 isoform X1 [Dendrobium catenatum]                                               |
| gene-MA16_Dca020005 | hypothetical protein MA16_Dca020005 [Dendrobium catenatum]                                                  |
| gene-MA16_Dca025409 | R3H domain-containing protein 1-like [Dendrobium catenatum]                                                 |
| gene-MA16_Dca009747 | hypothetical protein MA16_Dca009747 [Dendrobium catenatum]                                                  |
| gene-MA16_Dca017271 | uncharacterized protein LOC110094893 [Dendrobium catenatum]                                                 |
| gene-MA16_Dca025851 | Eukaryotic translation initiation factor 3 subunit A [Dendrobium catenatum]                                 |
| gene-MA16_Dca007184 | brassinosteroid LRR receptor kinase BRL1-like isoform X1 [Dendrobium catenatum]                             |
| gene-MA16_Dca023572 | hypothetical protein MA16_Dca023572 [Dendrobium catenatum]                                                  |



|                     |                                                                                                  |
|---------------------|--------------------------------------------------------------------------------------------------|
| gene-MA16_Dca017865 | Levopimaradiene synthase, chloroplastic [Dendrobium catenatum]                                   |
| gene-MA16_Dca028716 | hypothetical protein MA16_Dca028716 [Dendrobium catenatum]                                       |
| gene-MA16_Dca016675 | nodulation-signaling pathway 2 protein-like [Dendrobium catenatum]                               |
| gene-MA16_Dca017707 | DEAD-box ATP-dependent RNA helicase 39 isoform X1 [Dendrobium catenatum]                         |
| gene-MA16_Dca011973 | uncharacterized protein LOC110110533 [Dendrobium catenatum]                                      |
| gene-MA16_Dca015957 | Nuclear transcription factor Y subunit B-8 [Dendrobium catenatum]                                |
| gene-MA16_Dca007852 | zinc finger CCHC domain-containing protein 10 [Dendrobium catenatum]                             |
| gene-MA16_Dca024737 | Growth-regulating factor 6 [Dendrobium catenatum]                                                |
| gene-MA16_Dca025553 | Hypersensitive-induced response protein 4 [Dendrobium catenatum]                                 |
| gene-MA16_Dca022074 | trafficking protein particle complex subunit 8 isoform X1 [Dendrobium catenatum]                 |
| gene-MA16_Dca024483 | pentatricopeptide repeat-containing protein At1g11290, chloroplastic-like [Dendrobium catenatum] |
| gene-MA16_Dca019565 | hypothetical protein MA16_Dca019565 [Dendrobium catenatum]                                       |
| gene-MA16_Dca002672 | cytochrome P450 86B1-like [Dendrobium catenatum]                                                 |
| gene-MA16_Dca016809 | probable beta-D-xylosidase 2 [Dendrobium catenatum]                                              |
| gene-MA16_Dca018071 | calcium/calmodulin-regulated receptor-like kinase 2 [Dendrobium catenatum]                       |
| gene-MA16_Dca018603 | hypothetical protein MA16_Dca018603 [Dendrobium catenatum]                                       |
| gene-MA16_Dca011298 | uncharacterized protein LOC110101678 [Dendrobium catenatum]                                      |
| gene-MA16_Dca012467 | Methyl-CpG-binding domain-containing protein 1 [Dendrobium catenatum]                            |
| gene-MA16_Dca010017 | hypothetical protein MA16_Dca010017 [Dendrobium catenatum]                                       |
| gene-MA16_Dca002538 | probable transcription factor KAN2 [Dendrobium catenatum]                                        |
| gene-MA16_Dca006088 | hypothetical protein MA16_Dca006088 [Dendrobium catenatum]                                       |
| gene-MA16_Dca011730 | hypothetical protein MA16_Dca011730 [Dendrobium catenatum]                                       |
| gene-MA16_Dca019933 | Retrovirus-related Pol polyprotein from transposon TNT 1-94 [Dendrobium catenatum]               |
| gene-MA16_Dca005330 | ENHANCER OF AG-4 protein 2-like isoform X1 [Dendrobium catenatum]                                |
| gene-MA16_Dca020124 | DSC E3 ubiquitin ligase complex subunit 1-like [Dendrobium catenatum]                            |
| gene-MA16_Dca026376 | Cytochrome P450 71A1 [Dendrobium catenatum]                                                      |
| gene-MA16_Dca011443 | L-type lectin-domain containing receptor kinase S.4-like [Dendrobium catenatum]                  |
| gene-MA16_Dca022358 | hypothetical protein MA16_Dca022358 [Dendrobium catenatum]                                       |
| gene-MA16_Dca004692 | hypothetical protein MA16_Dca004692 [Dendrobium catenatum]                                       |
| gene-MA16_Dca021285 | probable protein S-acyltransferase 23 isoform X1 [Dendrobium catenatum]                          |

|                     |                                                                                          |
|---------------------|------------------------------------------------------------------------------------------|
| gene-MA16_Dca017220 | transmembrane protein 87A [Dendrobium catenatum]                                         |
| gene-MA16_Dca023911 | putative SNAP25 homologous protein SNAP30 isoform X1 [Dendrobium catenatum]              |
| gene-MA16_Dca001810 | putative serine/threonine-protein kinase [Dendrobium catenatum]                          |
| gene-MA16_Dca003804 | cytochrome P450 71A1-like [Dendrobium catenatum]                                         |
| gene-MA16_Dca013973 | Retrovirus-related Pol polyprotein from transposon TNT 1-94 [Dendrobium catenatum]       |
| gene-MA16_Dca016800 | Regulator of nonsense transcripts UPF2 [Dendrobium catenatum]                            |
| gene-MA16_Dca024521 | hypothetical protein MA16_Dca024521 [Dendrobium catenatum]                               |
| gene-MA16_Dca010335 | RNA polymerase II C-terminal domain phosphatase-like 1 [Dendrobium catenatum]            |
| gene-MA16_Dca015480 | helicase-like transcription factor CHR28 [Dendrobium catenatum]                          |
| gene-MA16_Dca001333 | uncharacterized protein LOC110100801 [Dendrobium catenatum]                              |
| gene-MA16_Dca016068 | succinate dehydrogenase subunit 7, mitochondrial-like [Dendrobium catenatum]             |
| gene-MA16_Dca008239 | hypothetical protein MA16_Dca008239 [Dendrobium catenatum]                               |
| gene-MA16_Dca028785 | hypothetical protein MA16_Dca028785 [Dendrobium catenatum]                               |
| gene-MA16_Dca000164 | Aspartic proteinase nepenthesin-1 [Dendrobium catenatum]                                 |
| gene-MA16_Dca013354 | hypothetical protein MA16_Dca013354 [Dendrobium catenatum]                               |
| gene-MA16_Dca026671 | hypothetical protein MA16_Dca026671 [Dendrobium catenatum]                               |
| gene-MA16_Dca008180 | hypothetical protein MA16_Dca008180 [Dendrobium catenatum]                               |
| gene-MA16_Dca000084 | putative disease resistance protein RGA3 [Dendrobium catenatum]                          |
| gene-MA16_Dca004101 | WAT1-related protein At4g08290-like [Dendrobium catenatum]                               |
| gene-MA16_Dca026213 | hypothetical protein MA16_Dca026213 [Dendrobium catenatum]                               |
| gene-MA16_Dca013892 | hypothetical protein MA16_Dca013892 [Dendrobium catenatum]                               |
| gene-MA16_Dca009052 | E3 ubiquitin-protein ligase ATL31-like [Dendrobium catenatum]                            |
| gene-MA16_Dca007591 | Subtilisin-like protease SDD1 [Dendrobium catenatum]                                     |
| gene-MA16_Dca020360 | Mitogen-activated protein kinase kinase kinase YODA [Dendrobium catenatum]               |
| gene-MA16_Dca013806 | transcription initiation factor TFIID subunit 12b-like isoform X1 [Dendrobium catenatum] |
| gene-MA16_Dca019557 | AT-rich interactive domain-containing protein 4-like isoform X1 [Dendrobium catenatum]   |
| gene-MA16_Dca001553 | putative disease resistance protein RGA1 isoform X1 [Dendrobium catenatum]               |
| gene-MA16_Dca021620 | uncharacterized protein LOC110113015 [Dendrobium catenatum]                              |
| gene-MA16_Dca000485 | Squamosa promoter-binding-like protein 18 [Dendrobium catenatum]                         |
| gene-MA16_Dca007632 | Serine/threonine-protein kinase [Dendrobium catenatum]                                   |

|                     |                                                                                        |
|---------------------|----------------------------------------------------------------------------------------|
| gene-MA16_Dca003224 | hypothetical protein MA16_Dca003224 [Dendrobium catenatum]                             |
| gene-MA16_Dca022048 | Retrovirus-related Pol polyprotein from transposon TNT 1-94 [Dendrobium catenatum]     |
| gene-MA16_Dca022148 | DEAD-box ATP-dependent RNA helicase 46-like [Dendrobium catenatum]                     |
| gene-MA16_Dca002932 | putative Myb family transcription factor At1g14600 isoform X2 [Dendrobium catenatum]   |
| gene-MA16_Dca010269 | transforming growth factor-beta receptor-associated protein 1 [Dendrobium catenatum]   |
| gene-MA16_Dca021955 | hypothetical protein MA16_Dca021955 [Dendrobium catenatum]                             |
| gene-MA16_Dca019292 | E1A-binding protein p400 [Dendrobium catenatum]                                        |
| gene-MA16_Dca006313 | Thioredoxin-like 4, chloroplastic [Dendrobium catenatum]                               |
| gene-MA16_Dca027425 | Tropinone reductase 1 [Dendrobium catenatum]                                           |
| gene-MA16_Dca025751 | inactive LRR receptor-like serine/threonine-protein kinase BIR2 [Dendrobium catenatum] |
| gene-MA16_Dca015690 | uncharacterized protein LOC110116180 [Dendrobium catenatum]                            |
| gene-MA16_Dca008901 | 3-oxoacyl-[acyl-carrier-protein] synthase I, chloroplastic [Dendrobium catenatum]      |
| gene-MA16_Dca024649 | hypothetical protein MA16_Dca024649 [Dendrobium catenatum]                             |
| gene-MA16_Dca017391 | Retrovirus-related Pol polyprotein from transposon TNT 1-94 [Dendrobium catenatum]     |
| gene-MA16_Dca019418 | uncharacterized protein LOC110110300 isoform X1 [Dendrobium catenatum]                 |
| gene-MA16_Dca016539 | uncharacterized protein LOC110113536 [Dendrobium catenatum]                            |
| gene-MA16_Dca001321 | Retrovirus-related Pol polyprotein from transposon TNT 1-94 [Dendrobium catenatum]     |
| gene-MA16_Dca004131 | hypothetical protein MA16_Dca004131 [Dendrobium catenatum]                             |
| gene-MA16_Dca002118 | Retrovirus-related Pol polyprotein from transposon TNT 1-94 [Dendrobium catenatum]     |
| gene-MA16_Dca013906 | Cycloeucaleanol cycloisomerase [Dendrobium catenatum]                                  |
| gene-MA16_Dca000995 | Pentatricopeptide repeat-containing protein [Dendrobium catenatum]                     |
| gene-MA16_Dca013327 | FT-interacting protein 1-like [Dendrobium catenatum]                                   |
| gene-MA16_Dca007694 | GATA transcription factor 26-like isoform X1 [Dendrobium catenatum]                    |
| gene-MA16_Dca027066 | Retrovirus-related Pol polyprotein from transposon TNT 1-94 [Dendrobium catenatum]     |
| gene-MA16_Dca027145 | subtilisin-like protease SBT1.7 [Dendrobium catenatum]                                 |
| gene-MA16_Dca024531 | hypothetical protein MA16_Dca024531 [Dendrobium catenatum]                             |
| gene-MA16_Dca027076 | hypothetical protein MA16_Dca027076 [Dendrobium catenatum]                             |
| gene-MA16_Dca000143 | poly [ADP-ribose] polymerase 2-A [Dendrobium catenatum]                                |
| gene-MA16_Dca017476 | putative flavin-containing monooxygenase 1 [Dendrobium catenatum]                      |
| gene-MA16_Dca014467 | uncharacterized protein LOC110111620 [Dendrobium catenatum]                            |

gene-MA16\_Dca003559 uncharacterized protein LOC110110389 [Dendrobium catenatum]  
gene-MA16\_Dca028340 Cellulose synthase A catalytic subunit 9 [UDP-forming] [Dendrobium catenatum]  
gene-MA16\_Dca009669 uncharacterized protein LOC110115650 [Dendrobium catenatum]  
gene-MA16\_Dca007063 probable plastid-lipid-associated protein 7, chloroplastic isoform X1 [Dendrobium catenatum]  
gene-MA16\_Dca027976 hypothetical protein MA16\_Dca027976 [Dendrobium catenatum]  
gene-MA16\_Dca028824 hypothetical protein MA16\_Dca028824 [Dendrobium catenatum]  
gene-MA16\_Dca027301 G-type lectin S-receptor-like serine/threonine-protein kinase B120 isoform X2 [Dendrobium catenatum]  
gene-MA16\_Dca025989 tRNA(adenine(34)) deaminase, chloroplastic isoform X1 [Dendrobium catenatum]  
gene-MA16\_Dca004159 NAC domain-containing protein 8 [Dendrobium catenatum]  
gene-MA16\_Dca005928 Gibberellin 2-beta-dioxygenase 8 [Dendrobium catenatum]  
gene-MA16\_Dca020953 Uncharacterized protein MA16\_Dca020953 [Dendrobium catenatum]  
gene-MA16\_Dca020178 hypothetical protein MA16\_Dca020178 [Dendrobium catenatum]  
gene-MA16\_Dca010911 uncharacterized protein LOC110116323 [Dendrobium catenatum]  
gene-MA16\_Dca020219 60S ribosomal protein L8 [Dendrobium catenatum]  
gene-MA16\_Dca000783 hypothetical protein MA16\_Dca000783 [Dendrobium catenatum]  
gene-MA16\_Dca023864 hypothetical protein MA16\_Dca023864 [Dendrobium catenatum]  
gene-MA16\_Dca023565 ACT domain-containing protein ACR2 [Dendrobium catenatum]  
gene-MA16\_Dca006055 hypothetical protein MA16\_Dca006055 [Dendrobium catenatum]  
gene-MA16\_Dca005016 hypothetical protein MA16\_Dca005016 [Dendrobium catenatum]  
gene-MA16\_Dca019159 acetyl-CoA carboxylase 1-like [Dendrobium catenatum]  
gene-MA16\_Dca011435 Retrovirus-related Pol polyprotein from transposon TNT 1-94 [Dendrobium catenatum]  
gene-MA16\_Dca023526 hypothetical protein MA16\_Dca023526 [Dendrobium catenatum]  
gene-MA16\_Dca015250 uncharacterized protein LOC110103465 isoform X1 [Dendrobium catenatum]  
gene-MA16\_Dca006017 hypothetical protein MA16\_Dca006017 [Dendrobium catenatum]  
gene-MA16\_Dca010464 putative methyltransferase PMT2 [Dendrobium catenatum]  
gene-MA16\_Dca015874 hypothetical protein MA16\_Dca015874 [Dendrobium catenatum]  
gene-MA16\_Dca009114 E3 ubiquitin-protein ligase BRE1-like 1 [Dendrobium catenatum]  
gene-MA16\_Dca022690 uncharacterized membrane protein At1g16860-like [Dendrobium catenatum]  
gene-MA16\_Dca011721 hypothetical protein MA16\_Dca011721 [Dendrobium catenatum]  
gene-MA16\_Dca004010 probable serine/threonine-protein kinase PBL5 [Dendrobium catenatum]

gene-MA16\_Dca013452 sialyltransferase-like protein 4 [Dendrobium catenatum]  
gene-MA16\_Dca011463 hypothetical protein MA16\_Dca011463 [Dendrobium catenatum]  
gene-MA16\_Dca028102 hypothetical protein MA16\_Dca028102 [Dendrobium catenatum]  
gene-MA16\_Dca004575 Pentatricopeptide repeat-containing protein [Dendrobium catenatum]  
gene-MA16\_Dca018279 uracil phosphoribosyltransferase isoform X2 [Dendrobium catenatum]  
gene-MA16\_Dca015735 Serine/threonine-protein kinase [Dendrobium catenatum]  
gene-MA16\_Dca012642 hypothetical protein MA16\_Dca012642 [Dendrobium catenatum]  
gene-MA16\_Dca018094 putative disease resistance protein RGA3 [Dendrobium catenatum]  
gene-MA16\_Dca003339 uncharacterized protein LOC110099020 [Dendrobium catenatum]  
gene-MA16\_Dca023179 NAC domain-containing protein 21/22-like [Dendrobium catenatum]  
gene-MA16\_Dca013716 CTP synthase 1-like [Dendrobium catenatum]  
gene-MA16\_Dca000903 ATP-dependent DNA helicase At3g02060, chloroplastic isoform X1 [Dendrobium catenatum]  
gene-MA16\_Dca011371 pentatricopeptide repeat-containing protein At2g22410, mitochondrial-like [Dendrobium catenatum]  
gene-MA16\_Dca011962 subtilisin-like protease SBT1.4 [Dendrobium catenatum]  
gene-MA16\_Dca014129 P-loop NTPase domain-containing protein LPA1-like isoform X1 [Dendrobium catenatum]  
gene-MA16\_Dca026698 phospholipase A1-lbeta2, chloroplastic-like [Dendrobium catenatum]  
gene-MA16\_Dca020338 Zinc finger protein CONSTANS-LIKE 5 [Dendrobium catenatum]  
gene-MA16\_Dca001587 ABC transporter B family member 1 [Dendrobium catenatum]  
gene-MA16\_Dca022156 Subtilisin-like protease SDD1 [Dendrobium catenatum]  
gene-MA16\_Dca013574 hypothetical protein MA16\_Dca013574 [Dendrobium catenatum]  
gene-MA16\_Dca022508 phosphatidylserine decarboxylase proenzyme 2-like [Dendrobium catenatum]  
gene-MA16\_Dca026108 Uridine nucleosidase 1 [Dendrobium catenatum]  
gene-MA16\_Dca024903 Putative disease resistance protein RGA4 [Dendrobium catenatum]  
gene-MA16\_Dca003869 RPM1-interacting protein 4-like isoform X3 [Dendrobium catenatum]  
gene-MA16\_Dca010385 syntaxin-41-like [Dendrobium catenatum]  
gene-MA16\_Dca028429 Retrovirus-related Pol polyprotein from transposon TNT 1-94 [Dendrobium catenatum]  
gene-MA16\_Dca012031 TBC1 domain family member 15-like isoform X1 [Dendrobium catenatum]  
gene-MA16\_Dca001199 putative disease resistance protein RGA3 [Dendrobium catenatum]  
gene-MA16\_Dca020965 hypothetical protein MA16\_Dca020965 [Dendrobium catenatum]  
gene-MA16\_Dca028021 DNA repair endonuclease UVH1-like [Dendrobium catenatum]

|                     |                                                                                    |
|---------------------|------------------------------------------------------------------------------------|
| gene-MA16_Dca015466 | B3 domain-containing protein [Dendrobium catenatum]                                |
| gene-MA16_Dca005551 | tetratricopeptide repeat protein SKI3 [Dendrobium catenatum]                       |
| gene-MA16_Dca003709 | NAC transcription factor ONAC010 [Dendrobium catenatum]                            |
| gene-MA16_Dca022001 | fasciclin-like arabinogalactan protein 19 [Dendrobium catenatum]                   |
| gene-MA16_Dca000126 | HSP-interacting protein [Dendrobium catenatum]                                     |
| gene-MA16_Dca015361 | ATPase family AAA domain-containing protein 3-like [Dendrobium catenatum]          |
| gene-MA16_Dca009985 | nuclear inhibitor of protein phosphatase 1 [Dendrobium catenatum]                  |
| gene-MA16_Dca015478 | Retrovirus-related Pol polyprotein from transposon TNT 1-94 [Dendrobium catenatum] |
| gene-MA16_Dca020025 | Putative ribonuclease H protein [Dendrobium catenatum]                             |
| gene-MA16_Dca006481 | protein BZR1 homolog 1-like [Dendrobium catenatum]                                 |
| gene-MA16_Dca018722 | hypothetical protein MA16_Dca018722 [Dendrobium catenatum]                         |
| gene-MA16_Dca010789 | ATP-dependent zinc metalloprotease FTSH 6, chloroplastic [Dendrobium catenatum]    |
| gene-MA16_Dca009384 | laccase-24-like [Dendrobium catenatum]                                             |
| gene-MA16_Dca008739 | Myb-related protein 3R-1 [Dendrobium catenatum]                                    |
| gene-MA16_Dca002930 | hypothetical protein MA16_Dca002930 [Dendrobium catenatum]                         |
| gene-MA16_Dca017666 | Putative ribonuclease H protein [Dendrobium catenatum]                             |
| gene-MA16_Dca002554 | ADP-ribosylation factor 1 [Dendrobium catenatum]                                   |
| gene-MA16_Dca009542 | hypothetical protein MA16_Dca009542 [Dendrobium catenatum]                         |
| gene-MA16_Dca011134 | Retrovirus-related Pol polyprotein from transposon TNT 1-94 [Dendrobium catenatum] |
| gene-MA16_Dca027179 | Retrovirus-related Pol polyprotein from transposon TNT 1-94 [Dendrobium catenatum] |
| gene-MA16_Dca024562 | uncharacterized protein LOC110100796 [Dendrobium catenatum]                        |
| gene-MA16_Dca000422 | UDP-glucuronate 4-epimerase 4-like [Dendrobium catenatum]                          |
| gene-MA16_Dca014491 | uncharacterized protein LOC110093029 [Dendrobium catenatum]                        |
| gene-MA16_Dca003801 | F-box protein [Dendrobium catenatum]                                               |
| gene-MA16_Dca025424 | disease resistance protein RGA2-like [Dendrobium catenatum]                        |
| gene-MA16_Dca009550 | 40S ribosomal protein S5 [Dendrobium catenatum]                                    |
| gene-MA16_Dca002617 | F-box protein [Dendrobium catenatum]                                               |
| gene-MA16_Dca026176 | hypothetical protein MA16_Dca026176 [Dendrobium catenatum]                         |
| gene-MA16_Dca017426 | serotonin N-acetyltransferase 1, chloroplastic [Dendrobium catenatum]              |
| gene-MA16_Dca028206 | Retrovirus-related Pol polyprotein from transposon TNT 1-94 [Dendrobium catenatum] |

|                     |                                                                                                   |
|---------------------|---------------------------------------------------------------------------------------------------|
| gene-MA16_Dca008826 | uncharacterized protein At1g27050 [Dendrobium catenatum]                                          |
| gene-MA16_Dca014761 | protein ECERIFERUM 26-like [Dendrobium catenatum]                                                 |
| gene-MA16_Dca015597 | U-box domain-containing protein 20-like [Dendrobium catenatum]                                    |
| gene-MA16_Dca007565 | histone H4 [Zea mays]                                                                             |
| gene-MA16_Dca000657 | hypothetical protein MA16_Dca000657 [Dendrobium catenatum]                                        |
| gene-MA16_Dca015846 | branchpoint-bridging protein-like [Dendrobium catenatum]                                          |
| gene-MA16_Dca005971 | Leucine-rich repeat extensin-like protein 4 [Dendrobium catenatum]                                |
| gene-MA16_Dca017670 | zinc finger A20 and AN1 domain-containing stress-associated protein 5-like [Dendrobium catenatum] |
| gene-MA16_Dca009232 | uncharacterized protein LOC110115434 [Dendrobium catenatum]                                       |
| gene-MA16_Dca000774 | Disease resistance protein RGA2 [Dendrobium catenatum]                                            |
| gene-MA16_Dca015912 | putative pentatricopeptide repeat-containing protein At3g08820 [Dendrobium catenatum]             |
| gene-MA16_Dca003270 | zinc finger protein ZAT2-like [Dendrobium catenatum]                                              |
| gene-MA16_Dca001748 | hypothetical protein MA16_Dca001748 [Dendrobium catenatum]                                        |
| gene-MA16_Dca002478 | tetraspanin-3-like [Dendrobium catenatum]                                                         |
| gene-MA16_Dca026886 | hypothetical protein MA16_Dca026886 [Dendrobium catenatum]                                        |
| gene-MA16_Dca026328 | Retrovirus-related Pol polyprotein from transposon TNT 1-94 [Dendrobium catenatum]                |
| gene-MA16_Dca005595 | ubiquitin-conjugating enzyme E2 4-like [Dendrobium catenatum]                                     |
| gene-MA16_Dca023885 | FT-interacting protein 1-like [Dendrobium catenatum]                                              |
| gene-MA16_Dca022078 | 5-methyltetrahydropteroyltriglutamate--homocysteine methyltransferase [Dendrobium catenatum]      |
| gene-MA16_Dca011533 | hypothetical protein MA16_Dca011533 [Dendrobium catenatum]                                        |
| gene-MA16_Dca013886 | mitogen-activated protein kinase 10-like isoform X1 [Dendrobium catenatum]                        |
| gene-MA16_Dca022291 | Serine/threonine-protein kinase GRIK1 [Dendrobium catenatum]                                      |
| gene-MA16_Dca026801 | Retrovirus-related Pol polyprotein from transposon TNT 1-94 [Dendrobium catenatum]                |
| gene-MA16_Dca007917 | CRM-domain containing factor CFM3, chloroplastic/mitochondrial isoform X1 [Dendrobium catenatum]  |
| gene-MA16_Dca023237 | hypothetical protein MA16_Dca023237 [Dendrobium catenatum]                                        |
| gene-MA16_Dca011099 | Cytochrome P450 71A9 [Dendrobium catenatum]                                                       |
| gene-MA16_Dca017831 | Formate dehydrogenase, mitochondrial [Dendrobium catenatum]                                       |
| gene-MA16_Dca008922 | Premnaspirodiene oxygenase [Dendrobium catenatum]                                                 |
| gene-MA16_Dca014578 | pentatricopeptide repeat-containing protein At3g54980, mitochondrial [Dendrobium catenatum]       |
| gene-MA16_Dca011577 | Mannan endo-1,4-beta-mannosidase 1 [Dendrobium catenatum]                                         |

|                     |                                                                                                             |
|---------------------|-------------------------------------------------------------------------------------------------------------|
| gene-MA16_Dca026028 | hypothetical protein MA16_Dca026028 [Dendrobium catenatum]                                                  |
| gene-MA16_Dca009628 | hypothetical protein MA16_Dca009628 [Dendrobium catenatum]                                                  |
| gene-MA16_Dca007067 | uncharacterized protein LOC110102921 [Dendrobium catenatum]                                                 |
| gene-MA16_Dca011106 | hypothetical protein MA16_Dca011106 [Dendrobium catenatum]                                                  |
| gene-MA16_Dca026290 | uncharacterized protein LOC110098520 [Dendrobium catenatum]                                                 |
| gene-MA16_Dca019228 | uncharacterized protein LOC110095413 [Dendrobium catenatum]                                                 |
| gene-MA16_Dca008856 | NAC domain-containing protein 10-like [Dendrobium catenatum]                                                |
| gene-MA16_Dca027531 | putative disease resistance protein RGA4 [Dendrobium catenatum]                                             |
| gene-MA16_Dca005992 | uncharacterized protein LOC110110891 [Dendrobium catenatum]                                                 |
| gene-MA16_Dca004888 | putative TPR repeat-containing protein [Dendrobium catenatum]                                               |
| gene-MA16_Dca000754 | hypothetical protein MA16_Dca000754 [Dendrobium catenatum]                                                  |
| gene-MA16_Dca013351 | putative 4-hydroxy-4-methyl-2-oxoglutarate aldolase 3 [Dendrobium catenatum]                                |
| gene-MA16_Dca021343 | DNA (cytosine-5)-methyltransferase DRM2 [Dendrobium catenatum]                                              |
| gene-MA16_Dca002514 | hypothetical protein MA16_Dca002514 [Dendrobium catenatum]                                                  |
| gene-MA16_Dca013669 | hypothetical protein MA16_Dca013669 [Dendrobium catenatum]                                                  |
| gene-MA16_Dca011586 | RNA-directed DNA polymerase [Dendrobium catenatum]                                                          |
| gene-MA16_Dca012922 | Putative ribonuclease H protein [Dendrobium catenatum]                                                      |
| gene-MA16_Dca009136 | Retrovirus-related Pol polyprotein from transposon TNT 1-94 [Dendrobium catenatum]                          |
| gene-MA16_Dca028404 | Putative ribonuclease H protein [Dendrobium catenatum]                                                      |
| gene-MA16_Dca017330 | NADH dehydrogenase [ubiquinone] 1 alpha subcomplex assembly factor 3-like isoform X1 [Dendrobium catenatum] |
| gene-MA16_Dca020826 | 3-deoxy-manno-octulosonate cytidyltransferase, mitochondrial isoform X1 [Dendrobium catenatum]              |
| gene-MA16_Dca025550 | cation/H(+) antiporter 15-like [Dendrobium catenatum]                                                       |
| gene-MA16_Dca018756 | oligopeptide transporter 3 [Dendrobium catenatum]                                                           |
| gene-MA16_Dca007809 | hippocampus abundant transcript 1 protein-like [Dendrobium catenatum]                                       |
| gene-MA16_Dca020963 | protein SUPPRESSOR OF PHYA-105 1-like [Dendrobium catenatum]                                                |
| gene-MA16_Dca001628 | hypothetical protein MA16_Dca001628 [Dendrobium catenatum]                                                  |
| gene-MA16_Dca010516 | hypothetical protein MA16_Dca010516 [Dendrobium catenatum]                                                  |
| gene-MA16_Dca017160 | WD repeat-containing protein DDB_G0290555 [Dendrobium catenatum]                                            |
| gene-MA16_Dca019818 | lactase-phlorizin hydrolase-like [Dendrobium catenatum]                                                     |
| gene-MA16_Dca016374 | uncharacterized protein LOC110110994 [Dendrobium catenatum]                                                 |



|                     |                                                                                                          |
|---------------------|----------------------------------------------------------------------------------------------------------|
| gene-MA16_Dca021278 | Eukaryotic translation initiation factor isoform 4G-1 [Dendrobium catenatum]                             |
| gene-MA16_Dca013555 | serine/arginine-rich splicing factor 4-like [Dendrobium catenatum]                                       |
| gene-MA16_Dca010804 | cleft lip and palate transmembrane protein 1 homolog [Dendrobium catenatum]                              |
| gene-MA16_Dca023524 | hypothetical protein MA16_Dca023524 [Dendrobium catenatum]                                               |
| gene-MA16_Dca014675 | hypothetical protein MA16_Dca014675 [Dendrobium catenatum]                                               |
| gene-MA16_Dca012972 | hypothetical protein MA16_Dca012972 [Dendrobium catenatum]                                               |
| gene-MA16_Dca021318 | NAC domain-containing protein 21/22-like [Dendrobium catenatum]                                          |
| gene-MA16_Dca028098 | DNA polymerase [Dendrobium catenatum]                                                                    |
| gene-MA16_Dca008352 | hypothetical protein MA16_Dca008352 [Dendrobium catenatum]                                               |
| gene-MA16_Dca014442 | crocetin glucosyltransferase 3 [Dendrobium catenatum]                                                    |
| gene-MA16_Dca022853 | hypothetical protein MA16_Dca022853 [Dendrobium catenatum]                                               |
| gene-MA16_Dca027107 | uncharacterized protein LOC110109377 [Dendrobium catenatum]                                              |
| gene-MA16_Dca012324 | bibenzyl synthase-like [Dendrobium catenatum]                                                            |
| gene-MA16_Dca025629 | palmitoyl-CoA hydrolase [Dendrobium catenatum]                                                           |
| gene-MA16_Dca008594 | putative LRR receptor-like serine/threonine-protein kinase [Dendrobium catenatum]                        |
| gene-MA16_Dca026076 | hypothetical protein MA16_Dca026076 [Dendrobium catenatum]                                               |
| gene-MA16_Dca006101 | hypothetical protein MA16_Dca006101 [Dendrobium catenatum]                                               |
| gene-MA16_Dca021079 | ATP synthase subunit beta, mitochondrial-like [Dendrobium catenatum]                                     |
| gene-MA16_Dca020263 | hypothetical protein MA16_Dca020263 [Dendrobium catenatum]                                               |
| gene-MA16_Dca011603 | probable ATP-dependent DNA helicase CHR12 isoform X3 [Dendrobium catenatum]                              |
| gene-MA16_Dca026927 | pyruvate dehydrogenase E1 component subunit alpha-3, chloroplastic [Dendrobium catenatum]                |
| gene-MA16_Dca015264 | leucine-rich repeat receptor-like serine/threonine/tyrosine-protein kinase SOBIR1 [Dendrobium catenatum] |
| gene-MA16_Dca021433 | Serine/threonine-protein kinase [Dendrobium catenatum]                                                   |
| gene-MA16_Dca000289 | hypothetical protein MA16_Dca019111 [Dendrobium catenatum]                                               |
| gene-MA16_Dca016512 | Ras-related protein RABC2a [Dendrobium catenatum]                                                        |
| gene-MA16_Dca021824 | phospholipase A(1) LCAT3 [Dendrobium catenatum]                                                          |
| gene-MA16_Dca002026 | putative mitochondrial protein [Dendrobium catenatum]                                                    |
| gene-MA16_Dca009198 | hypothetical protein MA16_Dca009198 [Dendrobium catenatum]                                               |
| gene-MA16_Dca021780 | putative mitochondrial protein [Dendrobium catenatum]                                                    |
| gene-MA16_Dca018789 | hypothetical protein MA16_Dca018789 [Dendrobium catenatum]                                               |

|                     |                                                                                           |
|---------------------|-------------------------------------------------------------------------------------------|
| gene-MA16_Dca019854 | aquaporin PIP1-2-like [Dendrobium catenatum]                                              |
| gene-MA16_Dca020850 | Protein ASPARTIC PROTEASE IN GUARD CELL 2 [Dendrobium catenatum]                          |
| gene-MA16_Dca024067 | Zinc finger CCCH domain-containing protein 4 [Dendrobium catenatum]                       |
| gene-MA16_Dca027323 | hypothetical protein MA16_Dca027323 [Dendrobium catenatum]                                |
| gene-MA16_Dca023808 | Nucleobase-ascorbate transporter 6 [Dendrobium catenatum]                                 |
| gene-MA16_Dca011854 | ABC transporter C family member 8 [Dendrobium catenatum]                                  |
| gene-MA16_Dca016727 | hypothetical protein MA16_Dca016727 [Dendrobium catenatum]                                |
| gene-MA16_Dca014102 | hypothetical protein MA16_Dca014102 [Dendrobium catenatum]                                |
| gene-MA16_Dca021909 | putative peptide/nitrate transporter [Dendrobium catenatum]                               |
| gene-MA16_Dca010182 | G-type lectin S-receptor-like serine/threonine-protein kinase RLK1 [Dendrobium catenatum] |
| gene-MA16_Dca027492 | hypothetical protein MA16_Dca027492 [Dendrobium catenatum]                                |
| gene-MA16_Dca020619 | Transcription factor HBP-1b(c1) [Dendrobium catenatum]                                    |
| gene-MA16_Dca018098 | Putative disease resistance protein RGA3 [Dendrobium catenatum]                           |
| gene-MA16_Dca000173 | uncharacterized protein LOC110092196 [Dendrobium catenatum]                               |
| gene-MA16_Dca005690 | uncharacterized protein LOC110092794 [Dendrobium catenatum]                               |
| gene-MA16_Dca016458 | protein NRT1/ PTR FAMILY 5.10-like isoform X1 [Dendrobium catenatum]                      |
| gene-MA16_Dca008000 | integrator complex subunit 11 [Dendrobium catenatum]                                      |
| gene-MA16_Dca019207 | uncharacterized protein LOC110093900 [Dendrobium catenatum]                               |
| gene-MA16_Dca016959 | hypothetical protein MA16_Dca016959 [Dendrobium catenatum]                                |
| gene-MA16_Dca028385 | Chorismate mutase 2 [Dendrobium catenatum]                                                |
| gene-MA16_Dca003630 | aldehyde dehydrogenase 22A1 [Dendrobium catenatum]                                        |
| gene-MA16_Dca026399 | transcription factor EMB1444-like [Dendrobium catenatum]                                  |
| gene-MA16_Dca011151 | Retrovirus-related Pol polyprotein from transposon TNT 1-94 [Dendrobium catenatum]        |
| gene-MA16_Dca012706 | trihelix transcription factor GTL1-like [Dendrobium catenatum]                            |
| gene-MA16_Dca017554 | uncharacterized protein LOC110109560 isoform X11 [Dendrobium catenatum]                   |
| gene-MA16_Dca013981 | type I inositol polyphosphate 5-phosphatase 8-like isoform X1 [Dendrobium catenatum]      |
| gene-MA16_Dca000756 | vesicle transport protein GOT1-like [Dendrobium catenatum]                                |
| gene-MA16_Dca025044 | serine/threonine-protein kinase ATG1t isoform X2 [Dendrobium catenatum]                   |
| gene-MA16_Dca018345 | eukaryotic translation initiation factor 2 subunit gamma-like [Dendrobium catenatum]      |
| gene-MA16_Dca023122 | Cytochrome P450 89A2 [Dendrobium catenatum]                                               |

|                     |                                                                                    |
|---------------------|------------------------------------------------------------------------------------|
| gene-MA16_Dca003118 | protein SUPPRESSOR OF K(+) TRANSPORT GROWTH DEFECT 1-like [Dendrobium catenatum]   |
| gene-MA16_Dca008215 | hypothetical protein MA16_Dca008215 [Dendrobium catenatum]                         |
| gene-MA16_Dca010241 | uncharacterized protein LOC110116537 [Dendrobium catenatum]                        |
| gene-MA16_Dca023641 | Retrovirus-related Pol polyprotein from transposon TNT 1-94 [Dendrobium catenatum] |
| gene-MA16_Dca019173 | RNA-directed DNA polymerase [Dendrobium catenatum]                                 |
| gene-MA16_Dca015141 | hypothetical protein MA16_Dca015141 [Dendrobium catenatum]                         |
| gene-MA16_Dca004149 | NAC transcription factor 25 [Dendrobium catenatum]                                 |
| gene-MA16_Dca003342 | hypothetical protein MA16_Dca003342 [Dendrobium catenatum]                         |
| gene-MA16_Dca026065 | hypothetical protein MA16_Dca026065 [Dendrobium catenatum]                         |
| gene-MA16_Dca020713 | hypothetical protein MA16_Dca020713 [Dendrobium catenatum]                         |
| gene-MA16_Dca026079 | cytochrome P450 CYP749A22-like [Dendrobium catenatum]                              |
| gene-MA16_Dca020299 | expansin-like B1 [Dendrobium catenatum]                                            |
| gene-MA16_Dca002309 | Embryogenesis-associated protein EMB8 [Dendrobium catenatum]                       |
| gene-MA16_Dca014625 | Retrovirus-related Pol polyprotein from transposon TNT 1-94 [Dendrobium catenatum] |
| gene-MA16_Dca004728 | Auxin response factor 18 [Dendrobium catenatum]                                    |
| gene-MA16_Dca028513 | RNA-directed DNA polymerase [Dendrobium catenatum]                                 |
| gene-MA16_Dca025324 | probable transcription factor KAN4 [Dendrobium catenatum]                          |
| gene-MA16_Dca006136 | uncharacterized protein LOC110110740 isoform X1 [Dendrobium catenatum]             |
| gene-MA16_Dca015903 | Regulatory-associated protein of TOR 1 [Dendrobium catenatum]                      |
| gene-MA16_Dca011239 | transcription factor SAC51-like [Dendrobium catenatum]                             |
| gene-MA16_Dca024189 | hypothetical protein MA16_Dca024189 [Dendrobium catenatum]                         |
| gene-MA16_Dca014398 | ELL-associated factor 2 [Dendrobium catenatum]                                     |
| gene-MA16_Dca015839 | dynamamin-related protein 3A-like isoform X2 [Dendrobium catenatum]                |
| gene-MA16_Dca021981 | U-box domain-containing protein 27-like [Dendrobium catenatum]                     |
| gene-MA16_Dca004287 | hypothetical protein MA16_Dca004287 [Dendrobium catenatum]                         |
| gene-MA16_Dca027962 | Retrovirus-related Pol polyprotein from transposon TNT 1-94 [Dendrobium catenatum] |
| gene-MA16_Dca021406 | hypothetical protein MA16_Dca021406 [Dendrobium catenatum]                         |
| gene-MA16_Dca000247 | uncharacterized protein LOC110114931 [Dendrobium catenatum]                        |
| gene-MA16_Dca000505 | uncharacterized membrane protein At1g06890-like [Dendrobium catenatum]             |
| gene-MA16_Dca003450 | hypothetical protein MA16_Dca003450 [Dendrobium catenatum]                         |

|                     |                                                                                |
|---------------------|--------------------------------------------------------------------------------|
| gene-MA16_Dca022543 | Uncharacterized protein MA16_Dca022543 [Dendrobium catenatum]                  |
| gene-MA16_Dca021083 | PI-PLC X domain-containing protein At5g67130 isoform X4 [Dendrobium catenatum] |
| gene-MA16_Dca009655 | isoflavone 2'-hydroxylase-like [Dendrobium catenatum]                          |
| gene-MA16_Dca025534 | mannose-specific lectin-like [Dendrobium catenatum]                            |
| gene-MA16_Dca015763 | hypothetical protein MA16_Dca015763 [Dendrobium catenatum]                     |
| gene-MA16_Dca000279 | putative disease resistance protein RGA3 [Dendrobium catenatum]                |
| gene-MA16_Dca024417 | beta-glucosidase 12-like [Dendrobium catenatum]                                |
| gene-MA16_Dca024403 | putative protein phosphatase 2C 27 [Dendrobium catenatum]                      |
| gene-MA16_Dca012290 | Zinc finger CCCH domain-containing protein 55 [Dendrobium catenatum]           |
| gene-MA16_Dca025262 | CBL-interacting protein kinase 2 [Dendrobium catenatum]                        |
| gene-MA16_Dca026084 | uncharacterized protein LOC110103293 [Dendrobium catenatum]                    |
| gene-MA16_Dca026762 | hypothetical protein MA16_Dca026762 [Dendrobium catenatum]                     |
| gene-MA16_Dca022455 | Receptor-like serine/threonine-protein kinase SD1-8 [Dendrobium catenatum]     |
| gene-MA16_Dca025504 | acyl-coenzyme A oxidase, peroxisomal [Dendrobium catenatum]                    |
| gene-MA16_Dca006366 | hypothetical protein MA16_Dca006366 [Dendrobium catenatum]                     |
| gene-MA16_Dca015429 | transcription factor PIF3-like [Dendrobium catenatum]                          |
| gene-MA16_Dca019648 | Chaperone protein dnaJ 49 [Dendrobium catenatum]                               |
| gene-MA16_Dca015273 | myosin-2 isoform X1 [Dendrobium catenatum]                                     |
| gene-MA16_Dca012189 | uncharacterized protein LOC110109190 [Dendrobium catenatum]                    |
| gene-MA16_Dca012725 | RING-H2 finger protein ATL39-like [Dendrobium catenatum]                       |
| gene-MA16_Dca001153 | mechanosensitive ion channel protein 10-like [Dendrobium catenatum]            |
| gene-MA16_Dca020583 | WEB family protein At5g16730, chloroplastic-like [Dendrobium catenatum]        |
| gene-MA16_Dca013650 | putative polyamine oxidase 2 [Dendrobium catenatum]                            |
| gene-MA16_Dca024732 | Ammonium transporter 3 member 1 [Dendrobium catenatum]                         |
| gene-MA16_Dca005100 | zinc-finger homeodomain protein 5-like [Dendrobium catenatum]                  |
| gene-MA16_Dca010954 | hypothetical protein MA16_Dca010954 [Dendrobium catenatum]                     |
| gene-MA16_Dca025150 | uncharacterized protein LOC110114729 [Dendrobium catenatum]                    |
| gene-MA16_Dca006906 | cation/calcium exchanger 1-like [Dendrobium catenatum]                         |
| gene-MA16_Dca013585 | hypothetical protein MA16_Dca013585 [Dendrobium catenatum]                     |
| gene-MA16_Dca010820 | protein FAR1-RELATED SEQUENCE 5-like [Dendrobium catenatum]                    |

|                     |                                                                                                        |
|---------------------|--------------------------------------------------------------------------------------------------------|
| gene-MA16_Dca005319 | SCAR-like protein 2 [Dendrobium catenatum]                                                             |
| gene-MA16_Dca005372 | Transcription factor PIF4 [Dendrobium catenatum]                                                       |
| gene-MA16_Dca005002 | Patellin-3 [Dendrobium catenatum]                                                                      |
| gene-MA16_Dca002342 | Carbonic anhydrase, chloroplastic [Dendrobium catenatum]                                               |
| gene-MA16_Dca002241 | putative helicase MAGATAMA 3 [Dendrobium catenatum]                                                    |
| gene-MA16_Dca016785 | hypothetical protein MA16_Dca016785 [Dendrobium catenatum]                                             |
| gene-MA16_Dca012052 | hypothetical protein MA16_Dca012052 [Dendrobium catenatum]                                             |
| gene-MA16_Dca011153 | LRR receptor-like serine/threonine-protein kinase GSO1 [Dendrobium catenatum]                          |
| gene-MA16_Dca008701 | hypothetical protein MA16_Dca008701 [Dendrobium catenatum]                                             |
| gene-MA16_Dca014238 | hypothetical protein MA16_Dca014238 [Dendrobium catenatum]                                             |
| gene-MA16_Dca002552 | ruBisCO large subunit-binding protein subunit beta, chloroplastic [Dendrobium catenatum]               |
| gene-MA16_Dca017065 | Protein kinase 2B, chloroplastic [Dendrobium catenatum]                                                |
| gene-MA16_Dca025880 | protein CHROMATIN REMODELING 19 isoform X1 [Dendrobium catenatum]                                      |
| gene-MA16_Dca009944 | Putative ribonuclease H protein [Dendrobium catenatum]                                                 |
| gene-MA16_Dca002196 | hypothetical protein MA16_Dca002196 [Dendrobium catenatum]                                             |
| gene-MA16_Dca018681 | B3 domain-containing protein Os07g0563300-like isoform X1 [Dendrobium catenatum]                       |
| gene-MA16_Dca013035 | hypothetical protein MA16_Dca013035 [Dendrobium catenatum]                                             |
| gene-MA16_Dca026072 | L-ascorbate peroxidase, cytosolic [Dendrobium catenatum]                                               |
| gene-MA16_Dca022287 | hypothetical protein MA16_Dca022287 [Dendrobium catenatum]                                             |
| gene-MA16_Dca019813 | putative rRNA-processing protein EBP2 like [Dendrobium catenatum]                                      |
| gene-MA16_Dca018101 | conserved oligomeric Golgi complex subunit 7 [Dendrobium catenatum]                                    |
| gene-MA16_Dca016862 | hypothetical protein MA16_Dca016862 [Dendrobium catenatum]                                             |
| gene-MA16_Dca002016 | probable LRR receptor-like serine/threonine-protein kinase At5g45780 isoform X1 [Dendrobium catenatum] |
| gene-MA16_Dca014266 | anaphase-promoting complex subunit 5 [Dendrobium catenatum]                                            |
| gene-MA16_Dca013722 | L-type lectin-domain containing receptor kinase IV.2 [Dendrobium catenatum]                            |
| gene-MA16_Dca000532 | D-xylose-proton symporter-like 3, chloroplastic [Dendrobium catenatum]                                 |
| gene-MA16_Dca000024 | CTP synthase-like [Dendrobium catenatum]                                                               |
| gene-MA16_Dca017889 | E3 ubiquitin-protein ligase HERC2-like [Dendrobium catenatum]                                          |
| gene-MA16_Dca014566 | F-box protein [Dendrobium catenatum]                                                                   |
| gene-MA16_Dca005825 | beta-glucosidase [Dendrobium catenatum]                                                                |

|                     |                                                                                     |
|---------------------|-------------------------------------------------------------------------------------|
| gene-MA16_Dca009831 | hypothetical protein MA16_Dca009831 [Dendrobium catenatum]                          |
| gene-MA16_Dca001741 | mannose-specific lectin-like [Dendrobium catenatum]                                 |
| gene-MA16_Dca000373 | Cleavage and polyadenylation specificity factor subunit 3-II [Dendrobium catenatum] |
| gene-MA16_Dca013836 | Outer envelope protein 64, mitochondrial [Dendrobium catenatum]                     |
| gene-MA16_Dca010212 | protein PLASTID MOVEMENT IMPAIRED 2 [Dendrobium catenatum]                          |
| gene-MA16_Dca009514 | geraniol 8-hydroxylase-like [Dendrobium catenatum]                                  |
| gene-MA16_Dca009077 | hypothetical protein MA16_Dca009077 [Dendrobium catenatum]                          |
| gene-MA16_Dca008286 | protein trichome birefringence-like 28 [Dendrobium catenatum]                       |
| gene-MA16_Dca012210 | BEL1-like homeodomain protein 6 [Dendrobium catenatum]                              |
| gene-MA16_Dca011551 | putative mitochondrial protein [Dendrobium catenatum]                               |
| gene-MA16_Dca023283 | Aspartic proteinase Asp1 [Dendrobium catenatum]                                     |
| gene-MA16_Dca014602 | putative cation-transporting ATPase [Dendrobium catenatum]                          |
| gene-MA16_Dca007693 | hypothetical protein MA16_Dca007693 [Dendrobium catenatum]                          |
| gene-MA16_Dca010839 | uncharacterized protein LOC110093216 [Dendrobium catenatum]                         |
| gene-MA16_Dca028126 | Putative ribonuclease H protein [Dendrobium catenatum]                              |
| gene-MA16_Dca018635 | ADP-ribosylation factor GTPase-activating protein AGD12 [Dendrobium catenatum]      |
| gene-MA16_Dca027557 | hypothetical protein MA16_Dca027557 [Dendrobium catenatum]                          |
| gene-MA16_Dca024868 | myb family transcription factor EFM-like [Dendrobium catenatum]                     |
| gene-MA16_Dca010584 | uncharacterized protein LOC110100289 [Dendrobium catenatum]                         |
| gene-MA16_Dca002874 | putative pre-mRNA-splicing factor ATP-dependent RNA helicase [Dendrobium catenatum] |
| gene-MA16_Dca010234 | hypothetical protein MA16_Dca010234 [Dendrobium catenatum]                          |
| gene-MA16_Dca021533 | putative serine/threonine-protein kinase [Dendrobium catenatum]                     |
| gene-MA16_Dca008850 | dirigent protein 6-like [Dendrobium catenatum]                                      |
| gene-MA16_Dca021336 | hypothetical protein MA16_Dca021336 [Dendrobium catenatum]                          |
| gene-MA16_Dca027918 | hypothetical protein MA16_Dca027918 [Dendrobium catenatum]                          |
| gene-MA16_Dca026772 | Retrovirus-related Pol polyprotein from transposon TNT 1-94 [Dendrobium catenatum]  |
| gene-MA16_Dca015971 | Putative ribonuclease H protein [Dendrobium catenatum]                              |
| gene-MA16_Dca010408 | la-related protein 1B-like [Dendrobium catenatum]                                   |
| gene-MA16_Dca016207 | auxin-responsive protein SAUR50-like [Dendrobium catenatum]                         |
| gene-MA16_Dca005359 | hypothetical protein MA16_Dca005359 [Dendrobium catenatum]                          |

|                     |                                                                                              |
|---------------------|----------------------------------------------------------------------------------------------|
| gene-MA16_Dca026221 | protein farnesyltransferase subunit beta isoform X1 [Dendrobium catenatum]                   |
| gene-MA16_Dca014685 | Transcription factor TCP13 [Dendrobium catenatum]                                            |
| gene-MA16_Dca006200 | protein WALLS ARE THIN 1 [Dendrobium catenatum]                                              |
| gene-MA16_Dca004760 | Heat shock cognate 70 kDa protein 2 [Dendrobium catenatum]                                   |
| gene-MA16_Dca016504 | Flap endonuclease GEN-like 1 [Dendrobium catenatum]                                          |
| gene-MA16_Dca012778 | putative LRR receptor-like serine/threonine-protein kinase [Dendrobium catenatum]            |
| gene-MA16_Dca006532 | hypothetical protein MA16_Dca006532 [Dendrobium catenatum]                                   |
| gene-MA16_Dca021611 | uncharacterized protein LOC110096793 [Dendrobium catenatum]                                  |
| gene-MA16_Dca021947 | hypothetical protein MA16_Dca021947 [Dendrobium catenatum]                                   |
| gene-MA16_Dca011643 | Transcription factor TCP3 [Dendrobium catenatum]                                             |
| gene-MA16_Dca019943 | Growth-regulating factor 5 [Dendrobium catenatum]                                            |
| gene-MA16_Dca012469 | Pyruvate, phosphate dikinase, chloroplastic [Dendrobium catenatum]                           |
| gene-MA16_Dca011938 | hypothetical protein MA16_Dca011938 [Dendrobium catenatum]                                   |
| gene-MA16_Dca005699 | Putative disease resistance protein RGA4 [Dendrobium catenatum]                              |
| gene-MA16_Dca002738 | proline iminopeptidase isoform X2 [Dendrobium catenatum]                                     |
| gene-MA16_Dca002321 | mitogen-activated protein kinase 9-like isoform X1 [Dendrobium catenatum]                    |
| gene-MA16_Dca024248 | Subtilisin-like protease [Dendrobium catenatum]                                              |
| gene-MA16_Dca000925 | Ethylene-responsive transcription factor ERF025 [Dendrobium catenatum]                       |
| gene-MA16_Dca010432 | hypothetical protein MA16_Dca010432 [Dendrobium catenatum]                                   |
| gene-MA16_Dca023386 | putative phyto kinase 2, chloroplastic [Dendrobium catenatum]                                |
| gene-MA16_Dca008623 | polygalacturonase inhibitor 2-like [Dendrobium catenatum]                                    |
| gene-MA16_Dca017447 | Homeobox protein ATH1 [Dendrobium catenatum]                                                 |
| gene-MA16_Dca011335 | Protein ACCUMULATION AND REPLICATION OF CHLOROPLASTS 6, chloroplastic [Dendrobium catenatum] |
| gene-MA16_Dca004006 | BRCT domain-containing protein [Dendrobium catenatum]                                        |
| gene-MA16_Dca015559 | Pentatricopeptide repeat-containing protein [Dendrobium catenatum]                           |
| gene-MA16_Dca008877 | hypothetical protein MA16_Dca008877 [Dendrobium catenatum]                                   |
| gene-MA16_Dca008791 | LRR receptor-like serine/threonine-protein kinase RPK2 [Dendrobium catenatum]                |
| gene-MA16_Dca022638 | DNA ligase 1 [Dendrobium catenatum]                                                          |
| gene-MA16_Dca018548 | probable transcription factor At5g28040 [Dendrobium catenatum]                               |
| gene-MA16_Dca006828 | uncharacterized protein LOC110092462 [Dendrobium catenatum]                                  |

|                     |                                                                                    |
|---------------------|------------------------------------------------------------------------------------|
| gene-MA16_Dca017338 | Filament-like plant protein 4 [Dendrobium catenatum]                               |
| gene-MA16_Dca015890 | hypothetical protein MA16_Dca015890 [Dendrobium catenatum]                         |
| gene-MA16_Dca000766 | hypothetical protein MA16_Dca000766 [Dendrobium catenatum]                         |
| gene-MA16_Dca023380 | hypothetical protein MA16_Dca023380 [Dendrobium catenatum]                         |
| gene-MA16_Dca014756 | Retrovirus-related Pol polyprotein from transposon TNT 1-94 [Dendrobium catenatum] |
| gene-MA16_Dca012694 | Pumilio like 3 [Dendrobium catenatum]                                              |
| gene-MA16_Dca011253 | 2-alkenal reductase (NADP(+)-dependent)-like isoform X1 [Dendrobium catenatum]     |
| gene-MA16_Dca003268 | uncharacterized protein LOC110093937 isoform X1 [Dendrobium catenatum]             |
| gene-MA16_Dca021600 | Pentatricopeptide repeat-containing protein [Dendrobium catenatum]                 |
| gene-MA16_Dca027711 | Retrovirus-related Pol polyprotein from transposon TNT 1-94 [Dendrobium catenatum] |
| gene-MA16_Dca000936 | Beta-fructofuranosidase, soluble isoenzyme I [Dendrobium catenatum]                |
| gene-MA16_Dca021232 | Disease resistance protein RGA2 [Dendrobium catenatum]                             |
| gene-MA16_Dca011708 | Structural maintenance of chromosomes protein 2-1 [Dendrobium catenatum]           |
| gene-MA16_Dca012991 | hypothetical protein MA16_Dca012991 [Dendrobium catenatum]                         |
| gene-MA16_Dca001992 | mitochondrial outer membrane porin-like [Dendrobium catenatum]                     |
| gene-MA16_Dca005769 | uncharacterized protein LOC110099318 [Dendrobium catenatum]                        |
| gene-MA16_Dca019855 | putative anion transporter 4, chloroplastic [Dendrobium catenatum]                 |
| gene-MA16_Dca006006 | Protein argonaute 7 [Dendrobium catenatum]                                         |
| gene-MA16_Dca025915 | Short-chain dehydrogenase reductase 3b [Dendrobium catenatum]                      |
| gene-MA16_Dca023379 | ERBB-3 BINDING PROTEIN 1 [Dendrobium catenatum]                                    |
| gene-MA16_Dca021649 | GDT1-like protein 2, chloroplastic [Dendrobium catenatum]                          |
| gene-MA16_Dca005141 | DNA topoisomerase 2-like [Dendrobium catenatum]                                    |
| gene-MA16_Dca021231 | disease resistance protein RGA2-like [Dendrobium catenatum]                        |
| gene-MA16_Dca006228 | hypothetical protein MA16_Dca006228 [Dendrobium catenatum]                         |
| gene-MA16_Dca019655 | ER lumen protein retaining receptor [Dendrobium catenatum]                         |
| gene-MA16_Dca026631 | Leucine-rich repeat receptor-like tyrosine-protein kinase [Dendrobium catenatum]   |
| gene-MA16_Dca003391 | uncharacterized protein LOC110100298 isoform X1 [Dendrobium catenatum]             |
| gene-MA16_Dca001915 | putative glucan endo-1,3-beta-glucosidase GVI [Dendrobium catenatum]               |
| gene-MA16_Dca022009 | hypothetical protein MA16_Dca022009 [Dendrobium catenatum]                         |
| gene-MA16_Dca008320 | Retrovirus-related Pol polyprotein from transposon TNT 1-94 [Dendrobium catenatum] |



|                     |                                                                                    |
|---------------------|------------------------------------------------------------------------------------|
| gene-MA16_Dca027522 | hypothetical protein MA16_Dca027522 [Dendrobium catenatum]                         |
| gene-MA16_Dca021729 | hypothetical protein MA16_Dca021729 [Dendrobium catenatum]                         |
| gene-MA16_Dca005855 | LOB domain-containing protein 6 [Dendrobium catenatum]                             |
| gene-MA16_Dca015660 | long chain acyl-CoA synthetase 4-like [Dendrobium catenatum]                       |
| gene-MA16_Dca022026 | probable inactive DNA (cytosine-5)-methyltransferase DRM3 [Dendrobium catenatum]   |
| gene-MA16_Dca010331 | Zinc finger CCCH domain-containing protein 37 [Dendrobium catenatum]               |
| gene-MA16_Dca028537 | Serine/threonine-protein phosphatase 7 long form like [Dendrobium catenatum]       |
| gene-MA16_Dca017689 | ABC transporter C family member 4-like isoform X1 [Dendrobium catenatum]           |
| gene-MA16_Dca023581 | Zinc finger CCCH domain-containing protein 18 [Dendrobium catenatum]               |
| gene-MA16_Dca006479 | Retrovirus-related Pol polyprotein from transposon TNT 1-94 [Dendrobium catenatum] |
| gene-MA16_Dca027705 | SNARE-interacting protein KEULE-like [Dendrobium catenatum]                        |
| gene-MA16_Dca003190 | protein MIZU-KUSSEI 1-like [Dendrobium catenatum]                                  |
| gene-MA16_Dca007683 | DNA repair endonuclease UVH1 [Dendrobium catenatum]                                |
| gene-MA16_Dca007578 | LRR repeats and ubiquitin-like domain-containing protein [Dendrobium catenatum]    |
| gene-MA16_Dca015921 | laccase-3-like isoform X1 [Dendrobium catenatum]                                   |
| gene-MA16_Dca017356 | Receptor-like protein kinase HSL1 [Dendrobium catenatum]                           |
| gene-MA16_Dca002499 | Uncharacterized protein MA16_Dca002499 [Dendrobium catenatum]                      |
| gene-MA16_Dca012886 | kinesin-like protein KIN-7K, chloroplastic [Dendrobium catenatum]                  |
| gene-MA16_Dca010222 | hypothetical protein MA16_Dca010222 [Dendrobium catenatum]                         |
| gene-MA16_Dca002534 | oligopeptide transporter 4-like [Dendrobium catenatum]                             |
| gene-MA16_Dca023290 | Protein translocase subunit SECA2, chloroplastic [Dendrobium catenatum]            |
| gene-MA16_Dca001924 | hypothetical protein MA16_Dca001924 [Dendrobium catenatum]                         |
| gene-MA16_Dca001616 | putative LRR receptor-like serine/threonine-protein kinase [Dendrobium catenatum]  |
| gene-MA16_Dca027576 | hypothetical protein MA16_Dca027576 [Dendrobium catenatum]                         |
| gene-MA16_Dca004957 | myb-related protein 330-like [Dendrobium catenatum]                                |
| gene-MA16_Dca017474 | putative disease resistance protein RGA4 [Dendrobium catenatum]                    |
| gene-MA16_Dca011278 | uncharacterized protein LOC110101662 [Dendrobium catenatum]                        |
| gene-MA16_Dca011630 | RNA-dependent RNA polymerase 1 [Dendrobium catenatum]                              |
| gene-MA16_Dca009034 | uncharacterized protein LOC110102985 [Dendrobium catenatum]                        |
| gene-MA16_Dca021948 | mitogen-activated protein kinase kinase kinase YODA-like [Dendrobium catenatum]    |

|                     |                                                                                                                    |
|---------------------|--------------------------------------------------------------------------------------------------------------------|
| gene-MA16_Dca021851 | inositol-tetrakisphosphate 1-kinase 3-like isoform X1 [Dendrobium catenatum]                                       |
| gene-MA16_Dca013089 | F-box protein At1g70590 isoform X1 [Dendrobium catenatum]                                                          |
| gene-MA16_Dca023974 | hypothetical protein MA16_Dca023974 [Dendrobium catenatum]                                                         |
| gene-MA16_Dca003102 | NDR1/HIN1-like protein 10 [Dendrobium catenatum]                                                                   |
| gene-MA16_Dca004266 | Protein ASPARTIC PROTEASE IN GUARD CELL 2 [Dendrobium catenatum]                                                   |
| gene-MA16_Dca019888 | scarecrow-like protein 23 [Dendrobium catenatum]                                                                   |
| gene-MA16_Dca018300 | putative disease resistance protein RGA4 [Dendrobium catenatum]                                                    |
| gene-MA16_Dca022585 | SRSF protein kinase 2-like [Dendrobium catenatum]                                                                  |
| gene-MA16_Dca012416 | Heat stress transcription factor A-4b [Dendrobium catenatum]                                                       |
| gene-MA16_Dca011959 | Growth-regulating factor 1 [Dendrobium catenatum]                                                                  |
| gene-MA16_Dca021919 | Retrovirus-related Pol polyprotein from transposon TNT 1-94 [Dendrobium catenatum]                                 |
| gene-MA16_Dca007306 | hypothetical protein MA16_Dca007306 [Dendrobium catenatum]                                                         |
| gene-MA16_Dca013237 | uncharacterized protein LOC110107641 isoform X1 [Dendrobium catenatum]                                             |
| gene-MA16_Dca026794 | tonoplast dicarboxylate transporter [Dendrobium catenatum]                                                         |
| gene-MA16_Dca006397 | Transcription factor GAMYB [Dendrobium catenatum]                                                                  |
| gene-MA16_Dca001763 | LEAF RUST 10 DISEASE-RESISTANCE LOCUS RECEPTOR-LIKE PROTEIN KINASE-like 1.2 [Dendrobium catenatum]                 |
| gene-MA16_Dca000956 | Putative ribonuclease H protein [Dendrobium catenatum]                                                             |
| gene-MA16_Dca015434 | probable pectinesterase/pectinesterase inhibitor 51 [Dendrobium catenatum]                                         |
| gene-MA16_Dca005619 | hypothetical protein MA16_Dca005619 [Dendrobium catenatum]                                                         |
| gene-MA16_Dca020425 | cinnamoyl-CoA reductase-like SNL6 [Dendrobium catenatum]                                                           |
| gene-MA16_Dca010637 | Myb-related protein 3R-1 [Dendrobium catenatum]                                                                    |
| gene-MA16_Dca021033 | bifunctional 3-dehydroquinate dehydratase/shikimate dehydrogenase, chloroplastic isoform X3 [Dendrobium catenatum] |
| gene-MA16_Dca026847 | Protein translocase subunit SECA2, chloroplastic [Dendrobium catenatum]                                            |
| gene-MA16_Dca001618 | cystinosin homolog [Dendrobium catenatum]                                                                          |
| gene-MA16_Dca004669 | myb-related protein Myb4-like [Dendrobium catenatum]                                                               |
| gene-MA16_Dca020827 | transcriptional regulator DEF1-like [Dendrobium catenatum]                                                         |
| gene-MA16_Dca018129 | hypothetical protein MA16_Dca018129 [Dendrobium catenatum]                                                         |
| gene-MA16_Dca020948 | 26S proteasome non-ATPase regulatory subunit 1 homolog A-like [Dendrobium catenatum]                               |
| gene-MA16_Dca022587 | cytochrome P450 93A3-like [Dendrobium catenatum]                                                                   |
| gene-MA16_Dca020196 | patellin-3-like [Dendrobium catenatum]                                                                             |

|                     |                                                                             |
|---------------------|-----------------------------------------------------------------------------|
| gene-MA16_Dca015938 | protein MALE DISCOVERER 2-like [Dendrobium catenatum]                       |
| gene-MA16_Dca013596 | hypothetical protein MA16_Dca013596 [Dendrobium catenatum]                  |
| gene-MA16_Dca006494 | hypothetical protein MA16_Dca006494 [Dendrobium catenatum]                  |
| gene-MA16_Dca004354 | hypothetical protein MA16_Dca004354 [Dendrobium catenatum]                  |
| gene-MA16_Dca022608 | ATP-dependent DNA helicase PIF1 [Dendrobium catenatum]                      |
| gene-MA16_Dca024496 | uncharacterized protein LOC110114634 [Dendrobium catenatum]                 |
| gene-MA16_Dca000558 | hypothetical protein MA16_Dca000558 [Dendrobium catenatum]                  |
| gene-MA16_Dca008252 | Fasciclin-like arabinogalactan protein 17 [Dendrobium catenatum]            |
| gene-MA16_Dca005529 | Formin-like protein 8 [Dendrobium catenatum]                                |
| gene-MA16_Dca003730 | squamosa promoter-binding-like protein 18 [Dendrobium catenatum]            |
| gene-MA16_Dca019935 | hypothetical protein MA16_Dca019935 [Dendrobium catenatum]                  |
| gene-MA16_Dca006505 | WRKY transcription factor SUSIBA2-like isoform X2 [Dendrobium catenatum]    |
| gene-MA16_Dca011967 | hypothetical protein MA16_Dca011967 [Dendrobium catenatum]                  |
| gene-MA16_Dca012195 | chorismate mutase 1, chloroplastic [Dendrobium catenatum]                   |
| gene-MA16_Dca014645 | Serine carboxypeptidase-like 6 [Dendrobium catenatum]                       |
| gene-MA16_Dca009661 | 3-oxo-Delta(4,5)-steroid 5-beta-reductase [Dendrobium catenatum]            |
| gene-MA16_Dca029126 | hypothetical protein MA16_Dca029126 [Dendrobium catenatum]                  |
| gene-MA16_Dca014542 | protein SABRE isoform X1 [Dendrobium catenatum]                             |
| gene-MA16_Dca019890 | Putative disease resistance protein RGA4 [Dendrobium catenatum]             |
| gene-MA16_Dca012932 | E3 ubiquitin-protein ligase MBR2-like [Dendrobium catenatum]                |
| gene-MA16_Dca026559 | auxin efflux carrier component 7-like isoform X1 [Dendrobium catenatum]     |
| gene-MA16_Dca021281 | TPR repeat-containing thioredoxin TTL2 [Dendrobium catenatum]               |
| gene-MA16_Dca006965 | hypothetical protein MA16_Dca006965 [Dendrobium catenatum]                  |
| gene-MA16_Dca009296 | Serine/threonine-protein kinase ATM [Dendrobium catenatum]                  |
| gene-MA16_Dca016000 | putative UDP-sugar transporter DDB_G0278631 [Dendrobium catenatum]          |
| gene-MA16_Dca028825 | hypothetical protein MA16_Dca028825 [Dendrobium catenatum]                  |
| gene-MA16_Dca023972 | ubiquitin-40S ribosomal protein S27a [Dendrobium catenatum]                 |
| gene-MA16_Dca018087 | GATA transcription factor 4-like [Dendrobium catenatum]                     |
| gene-MA16_Dca012140 | hypothetical protein MA16_Dca012140 [Dendrobium catenatum]                  |
| gene-MA16_Dca016761 | squamosa promoter-binding-like protein 18 isoform X1 [Dendrobium catenatum] |

|                     |                                                                                                        |
|---------------------|--------------------------------------------------------------------------------------------------------|
| gene-MA16_Dca001782 | Potassium transporter 26 [Dendrobium catenatum]                                                        |
| gene-MA16_Dca012607 | uncharacterized protein LOC110099029 [Dendrobium catenatum]                                            |
| gene-MA16_Dca005916 | anamorsin homolog [Dendrobium catenatum]                                                               |
| gene-MA16_Dca024782 | DNA polymerase epsilon subunit 4 isoform X1 [Dendrobium catenatum]                                     |
| gene-MA16_Dca018237 | probable LRR receptor-like serine/threonine-protein kinase At5g10290 isoform X2 [Dendrobium catenatum] |
| gene-MA16_Dca018980 | hypothetical protein MA16_Dca018980 [Dendrobium catenatum]                                             |
| gene-MA16_Dca019265 | oligopeptide transporter 1-like [Dendrobium catenatum]                                                 |
| gene-MA16_Dca004861 | RING-H2 finger protein ATL60 [Dendrobium catenatum]                                                    |
| gene-MA16_Dca007845 | LRR receptor-like serine/threonine-protein kinase EFR [Dendrobium catenatum]                           |
| gene-MA16_Dca003306 | epoxide hydrolase 4 [Dendrobium catenatum]                                                             |
| gene-MA16_Dca028599 | BTB/POZ domain-containing protein [Dendrobium catenatum]                                               |
| gene-MA16_Dca010312 | hypothetical protein MA16_Dca010312 [Dendrobium catenatum]                                             |
| gene-MA16_Dca008224 | Putative disease resistance protein RGA3 [Dendrobium catenatum]                                        |
| gene-MA16_Dca021264 | pentatricopeptide repeat-containing protein At1g01970 isoform X1 [Dendrobium catenatum]                |
| gene-MA16_Dca003454 | hypothetical protein MA16_Dca003454 [Dendrobium catenatum]                                             |
| gene-MA16_Dca013843 | Putative ribonuclease H protein [Dendrobium catenatum]                                                 |
| gene-MA16_Dca024442 | probable UDP-arabinose 4-epimerase 2 [Dendrobium catenatum]                                            |
| gene-MA16_Dca024079 | protein DJ-1 homolog B [Dendrobium catenatum]                                                          |
| gene-MA16_Dca021440 | putative mitochondrial protein [Dendrobium catenatum]                                                  |
| gene-MA16_Dca024872 | hypothetical protein MA16_Dca024872 [Dendrobium catenatum]                                             |
| gene-MA16_Dca014483 | hypothetical protein MA16_Dca014483 [Dendrobium catenatum]                                             |
| gene-MA16_Dca004340 | arginyl-tRNA--protein transferase 2-like isoform X1 [Dendrobium catenatum]                             |
| gene-MA16_Dca001502 | hypothetical protein MA16_Dca001502 [Dendrobium catenatum]                                             |
| gene-MA16_Dca018794 | uncharacterized protein LOC110100477 [Dendrobium catenatum]                                            |
| gene-MA16_Dca016389 | Diaminopimelate decarboxylase 1, chloroplastic [Dendrobium catenatum]                                  |
| gene-MA16_Dca027963 | ATP synthase subunit alpha, mitochondrial [Dendrobium catenatum]                                       |
| gene-MA16_Dca003646 | glycerol-3-phosphate acyltransferase 1-like [Dendrobium catenatum]                                     |
| gene-MA16_Dca008655 | hypothetical protein MA16_Dca008655 [Dendrobium catenatum]                                             |
| gene-MA16_Dca010688 | GDSL esterase/lipase At1g71691-like [Dendrobium catenatum]                                             |
| gene-MA16_Dca012598 | uncharacterized protein LOC110099064 [Dendrobium catenatum]                                            |

|                     |                                                                                              |
|---------------------|----------------------------------------------------------------------------------------------|
| gene-MA16_Dca021754 | hypothetical protein MA16_Dca021754 [Dendrobium catenatum]                                   |
| gene-MA16_Dca018178 | hypothetical protein MA16_Dca018178 [Dendrobium catenatum]                                   |
| gene-MA16_Dca017527 | DNA repair helicase UVH6 [Dendrobium catenatum]                                              |
| gene-MA16_Dca025192 | spindle assembly checkpoint component MAD1 [Dendrobium catenatum]                            |
| gene-MA16_Dca011382 | putative mitochondrial protein [Dendrobium catenatum]                                        |
| gene-MA16_Dca024277 | uncharacterized protein LOC110103864 [Dendrobium catenatum]                                  |
| gene-MA16_Dca021112 | hypothetical protein MA16_Dca021112 [Dendrobium catenatum]                                   |
| gene-MA16_Dca006726 | LYR motif-containing protein 4 [Dendrobium catenatum]                                        |
| gene-MA16_Dca022778 | hypothetical protein MA16_Dca022778 [Dendrobium catenatum]                                   |
| gene-MA16_Dca011500 | Protein SCAR2 [Dendrobium catenatum]                                                         |
| gene-MA16_Dca006942 | putative mitochondrial protein [Dendrobium catenatum]                                        |
| gene-MA16_Dca027664 | hypothetical protein MA16_Dca027664 [Dendrobium catenatum]                                   |
| gene-MA16_Dca005998 | hypothetical protein MA16_Dca005998 [Dendrobium catenatum]                                   |
| gene-MA16_Dca007518 | 1-aminocyclopropane-1-carboxylate synthase-like [Dendrobium catenatum]                       |
| gene-MA16_Dca003158 | putative peptide/nitrate transporter [Dendrobium catenatum]                                  |
| gene-MA16_Dca018248 | Inactive TPR repeat-containing thioredoxin TTL3 [Dendrobium catenatum]                       |
| gene-MA16_Dca010390 | putative mitochondrial protein [Dendrobium catenatum]                                        |
| gene-MA16_Dca003429 | Serine carboxypeptidase-like 36 [Dendrobium catenatum]                                       |
| gene-MA16_Dca011523 | hypothetical protein MA16_Dca011523 [Dendrobium catenatum]                                   |
| gene-MA16_Dca012021 | Beta-glucosidase 6 [Dendrobium catenatum]                                                    |
| gene-MA16_Dca017709 | trans-resveratrol di-O-methyltransferase-like [Dendrobium catenatum]                         |
| gene-MA16_Dca000262 | F-box protein SKIP14 [Dendrobium catenatum]                                                  |
| gene-MA16_Dca012310 | pectinesterase-like [Dendrobium catenatum]                                                   |
| gene-MA16_Dca011228 | probable xyloglucan galactosyltransferase GT17 [Dendrobium catenatum]                        |
| gene-MA16_Dca018102 | integrator complex subunit 11 [Dendrobium catenatum]                                         |
| gene-MA16_Dca024450 | ectonucleotide pyrophosphatase/phosphodiesterase family member 3-like [Dendrobium catenatum] |
| gene-MA16_Dca020442 | putative protein phosphatase 2C 77 [Dendrobium catenatum]                                    |
| gene-MA16_Dca022876 | Squamosa promoter-binding-like protein 15 [Dendrobium catenatum]                             |
| gene-MA16_Dca006916 | Agamous-like MADS-box protein AGL61 [Dendrobium catenatum]                                   |
| gene-MA16_Dca023861 | Putative disease resistance protein RGA3 [Dendrobium catenatum]                              |

|                     |                                                                                                      |
|---------------------|------------------------------------------------------------------------------------------------------|
| gene-MA16_Dca010485 | hypothetical protein MA16_Dca010485 [Dendrobium catenatum]                                           |
| gene-MA16_Dca021254 | hypothetical protein MA16_Dca021254 [Dendrobium catenatum]                                           |
| gene-MA16_Dca019802 | rRNA biogenesis protein RRP5 isoform X2 [Dendrobium catenatum]                                       |
| gene-MA16_Dca004396 | 9-cis-epoxycarotenoid dioxygenase, chloroplastic [Dendrobium catenatum]                              |
| gene-MA16_Dca018127 | E3 ubiquitin protein ligase DRIP2-like [Dendrobium catenatum]                                        |
| gene-MA16_Dca008112 | putative pentatricopeptide repeat-containing protein At5g06400, mitochondrial [Dendrobium catenatum] |
| gene-MA16_Dca026614 | sorting nexin 2B-like isoform X2 [Dendrobium catenatum]                                              |
| gene-MA16_Dca008882 | splicing factor 3B subunit 3-like [Dendrobium catenatum]                                             |
| gene-MA16_Dca019551 | hypothetical protein MA16_Dca019551 [Dendrobium catenatum]                                           |
| gene-MA16_Dca025147 | hypothetical protein MA16_Dca025147 [Dendrobium catenatum]                                           |
| gene-MA16_Dca001544 | hypothetical protein MA16_Dca001544 [Dendrobium catenatum]                                           |
| gene-MA16_Dca015701 | hypothetical protein MA16_Dca015701 [Dendrobium catenatum]                                           |
| gene-MA16_Dca014628 | uncharacterized protein PFB0145c-like isoform X1 [Dendrobium catenatum]                              |
| gene-MA16_Dca014256 | Serine/threonine-protein kinase PBS1 [Dendrobium catenatum]                                          |
| gene-MA16_Dca009355 | ATP sulfurylase 1, chloroplastic-like [Dendrobium catenatum]                                         |
| gene-MA16_Dca008355 | hypothetical protein MA16_Dca008355 [Dendrobium catenatum]                                           |
| gene-MA16_Dca013012 | uncharacterized protein LOC110097362 isoform X1 [Dendrobium catenatum]                               |
| gene-MA16_Dca001585 | hypothetical protein MA16_Dca001585 [Dendrobium catenatum]                                           |
| gene-MA16_Dca006571 | hypothetical protein MA16_Dca006571 [Dendrobium catenatum]                                           |
| gene-MA16_Dca006076 | probable E3 ubiquitin-protein ligase XBOS34 isoform X1 [Dendrobium catenatum]                        |
| gene-MA16_Dca022269 | Serine/threonine-protein kinase TOR [Dendrobium catenatum]                                           |
| gene-MA16_Dca009503 | hypothetical protein MA16_Dca009503 [Dendrobium catenatum]                                           |
| gene-MA16_Dca018731 | hypothetical protein MA16_Dca018731 [Dendrobium catenatum]                                           |
| gene-MA16_Dca023966 | Retrovirus-related Pol polyprotein from transposon TNT 1-94 [Dendrobium catenatum]                   |
| gene-MA16_Dca017000 | target of Myb protein 1 isoform X1 [Dendrobium catenatum]                                            |
| gene-MA16_Dca021446 | heat shock protein 81-1-like [Dendrobium catenatum]                                                  |
| gene-MA16_Dca021677 | hypothetical protein MA16_Dca021677 [Dendrobium catenatum]                                           |
| gene-MA16_Dca018172 | ETHYLENE INSENSITIVE 3-like 1 protein [Dendrobium catenatum]                                         |
| gene-MA16_Dca000690 | hypothetical protein MA16_Dca000690 [Dendrobium catenatum]                                           |
| gene-MA16_Dca008526 | Phospholipid-transporting ATPase 1 [Dendrobium catenatum]                                            |

|                     |                                                                                         |
|---------------------|-----------------------------------------------------------------------------------------|
| gene-MA16_Dca013368 | auxin response factor 17-like [Dendrobium catenatum]                                    |
| gene-MA16_Dca011199 | Ent-kaurene oxidase, chloroplastic [Dendrobium catenatum]                               |
| gene-MA16_Dca003493 | uncharacterized protein LOC110094340 isoform X1 [Dendrobium catenatum]                  |
| gene-MA16_Dca008478 | VAN3-binding protein [Dendrobium catenatum]                                             |
| gene-MA16_Dca003133 | uncharacterized protein LOC110094072 [Dendrobium catenatum]                             |
| gene-MA16_Dca003495 | putative vesicle-associated membrane protein 726 [Dendrobium catenatum]                 |
| gene-MA16_Dca010505 | Tetrahydrocannabinolic acid synthase [Dendrobium catenatum]                             |
| gene-MA16_Dca003855 | uncharacterized protein LOC110104967 [Dendrobium catenatum]                             |
| gene-MA16_Dca006119 | peptide-N4-(N-acetyl-beta-glucosaminyl)asparagine amidase A-like [Dendrobium catenatum] |
| gene-MA16_Dca026967 | E3 ubiquitin-protein ligase SINA-like 10 [Dendrobium catenatum]                         |
| gene-MA16_Dca007810 | probably inactive receptor-like protein kinase At2g46850 [Dendrobium catenatum]         |
| gene-MA16_Dca005803 | translation initiation factor eIF-2B subunit beta isoform X1 [Dendrobium catenatum]     |
| gene-MA16_Dca008680 | Putative ribonuclease H protein [Dendrobium catenatum]                                  |
| gene-MA16_Dca014980 | Beta-D-xylosidase 4 [Dendrobium catenatum]                                              |
| gene-MA16_Dca003355 | phospholipase D alpha 1-like [Dendrobium catenatum]                                     |
| gene-MA16_Dca024651 | hypothetical protein MA16_Dca024651 [Dendrobium catenatum]                              |
| gene-MA16_Dca011697 | Pentatricopeptide repeat-containing protein [Dendrobium catenatum]                      |
| gene-MA16_Dca020359 | disease resistance protein RGA2-like [Dendrobium catenatum]                             |
| gene-MA16_Dca016456 | squamosa promoter-binding-like protein 14 isoform X2 [Dendrobium catenatum]             |
| gene-MA16_Dca019642 | uncharacterized protein LOC110109304 isoform X1 [Dendrobium catenatum]                  |
| gene-MA16_Dca001622 | Eukaryotic translation initiation factor isoform 4G-1 [Dendrobium catenatum]            |
| gene-MA16_Dca016864 | Long chain acyl-CoA synthetase 9, chloroplastic [Dendrobium catenatum]                  |
| gene-MA16_Dca004993 | putative disease resistance protein RGA1 [Dendrobium catenatum]                         |
| gene-MA16_Dca004403 | piriformospora indica-insensitive protein 2-like [Dendrobium catenatum]                 |
| gene-MA16_Dca004293 | pectinesterase-like [Dendrobium catenatum]                                              |
| gene-MA16_Dca015383 | transport inhibitor response 1-like protein [Dendrobium catenatum]                      |
| gene-MA16_Dca007851 | Pleiotropic drug resistance protein 12 [Dendrobium catenatum]                           |
| gene-MA16_Dca009995 | Clustered mitochondria protein [Dendrobium catenatum]                                   |
| gene-MA16_Dca014331 | protein trichome birefringence-like 26 [Dendrobium catenatum]                           |
| gene-MA16_Dca006234 | hypothetical protein MA16_Dca006234 [Dendrobium catenatum]                              |

|                     |                                                                                    |
|---------------------|------------------------------------------------------------------------------------|
| gene-MA16_Dca009490 | hypothetical protein MA16_Dca009490 [Dendrobium catenatum]                         |
| gene-MA16_Dca007185 | golgin candidate 5 isoform X2 [Dendrobium catenatum]                               |
| gene-MA16_Dca027712 | F-box protein [Dendrobium catenatum]                                               |
| gene-MA16_Dca003369 | two-component response regulator ORR22-like [Dendrobium catenatum]                 |
| gene-MA16_Dca026478 | aspartokinase 2, chloroplastic-like [Dendrobium catenatum]                         |
| gene-MA16_Dca020802 | uncharacterized protein LOC110104429 isoform X2 [Dendrobium catenatum]             |
| gene-MA16_Dca013506 | universal stress protein PHOS34 [Dendrobium catenatum]                             |
| gene-MA16_Dca022196 | U-box domain-containing protein 17-like [Dendrobium catenatum]                     |
| gene-MA16_Dca019875 | hypothetical protein MA16_Dca019875 [Dendrobium catenatum]                         |
| gene-MA16_Dca001987 | uncharacterized protein LOC110100094 [Dendrobium catenatum]                        |
| gene-MA16_Dca003862 | hypothetical protein MA16_Dca003862 [Dendrobium catenatum]                         |
| gene-MA16_Dca003718 | Flowering time control protein FCA [Dendrobium catenatum]                          |
| gene-MA16_Dca002878 | Small ubiquitin-related modifier 1 [Dendrobium catenatum]                          |
| gene-MA16_Dca004133 | 31 kDa ribonucleoprotein, chloroplastic [Dendrobium catenatum]                     |
| gene-MA16_Dca006414 | expansin-A18-like [Dendrobium catenatum]                                           |
| gene-MA16_Dca018150 | Transcriptional regulator TAC1 [Dendrobium catenatum]                              |
| gene-MA16_Dca012666 | ubiquitin carboxyl-terminal hydrolase 12-like isoform X1 [Dendrobium catenatum]    |
| gene-MA16_Dca003650 | probable methyltransferase PMT23 isoform X5 [Dendrobium catenatum]                 |
| gene-MA16_Dca012190 | probable serine/threonine-protein kinase At1g54610 [Dendrobium catenatum]          |
| gene-MA16_Dca021000 | Mannan endo-1,4-beta-mannosidase 1 [Dendrobium catenatum]                          |
| gene-MA16_Dca002089 | Sucrose transport protein SUT1 [Dendrobium catenatum]                              |
| gene-MA16_Dca022649 | Retrovirus-related Pol polyprotein from transposon TNT 1-94 [Dendrobium catenatum] |
| gene-MA16_Dca006258 | VIN3-like protein 2 isoform X2 [Dendrobium catenatum]                              |
| gene-MA16_Dca003404 | Trans-resveratrol di-O-methyltransferase [Dendrobium catenatum]                    |
| gene-MA16_Dca025220 | uncharacterized protein LOC110106358 [Dendrobium catenatum]                        |
| gene-MA16_Dca000440 | zinc finger protein ZAT4-like [Dendrobium catenatum]                               |
| gene-MA16_Dca010102 | Retrovirus-related Pol polyprotein from transposon TNT 1-94 [Dendrobium catenatum] |
| gene-MA16_Dca028386 | Putative AC transposase [Dendrobium catenatum]                                     |
| gene-MA16_Dca028026 | disease resistance protein RGA2-like [Dendrobium catenatum]                        |
| gene-MA16_Dca013631 | MLO-like protein 10 [Dendrobium catenatum]                                         |



|                     |                                                                                    |
|---------------------|------------------------------------------------------------------------------------|
| gene-MA16_Dca014352 | diacylglycerol kinase 2 isoform X1 [Dendrobium catenatum]                          |
| gene-MA16_Dca017756 | putative G3BP-like protein isoform X1 [Dendrobium catenatum]                       |
| gene-MA16_Dca000527 | Protein TIC 62, chloroplastic [Dendrobium catenatum]                               |
| gene-MA16_Dca027342 | RNA-directed DNA polymerase [Dendrobium catenatum]                                 |
| gene-MA16_Dca001937 | RNA-binding protein 1-like [Dendrobium catenatum]                                  |
| gene-MA16_Dca007949 | Protein ROOT HAIR DEFECTIVE 3 [Dendrobium catenatum]                               |
| gene-MA16_Dca010554 | urease accessory protein D isoform X1 [Dendrobium catenatum]                       |
| gene-MA16_Dca003096 | DNA repair protein REV1 [Dendrobium catenatum]                                     |
| gene-MA16_Dca020624 | transcription factor GAMYB-like isoform X1 [Dendrobium catenatum]                  |
| gene-MA16_Dca023804 | Retrovirus-related Pol polyprotein from transposon TNT 1-94 [Dendrobium catenatum] |
| gene-MA16_Dca021431 | putative inactive purple acid phosphatase 27 [Dendrobium catenatum]                |
| gene-MA16_Dca019789 | hypothetical protein MA16_Dca019789 [Dendrobium catenatum]                         |
| gene-MA16_Dca001074 | TLC domain-containing protein At5g14285-like [Dendrobium catenatum]                |
| gene-MA16_Dca020751 | Homeobox-leucine zipper protein HOX32 [Dendrobium catenatum]                       |
| gene-MA16_Dca000621 | hypothetical protein MA16_Dca000621 [Dendrobium catenatum]                         |
| gene-MA16_Dca017812 | hypothetical protein MA16_Dca017812 [Dendrobium catenatum]                         |
| gene-MA16_Dca024139 | auxin response factor 2-like [Dendrobium catenatum]                                |
| gene-MA16_Dca017977 | betaine aldehyde dehydrogenase 1, chloroplastic-like [Dendrobium catenatum]        |
| gene-MA16_Dca000803 | Retrovirus-related Pol polyprotein from transposon TNT 1-94 [Dendrobium catenatum] |
| gene-MA16_Dca026346 | riboflavin kinase [Dendrobium catenatum]                                           |
| gene-MA16_Dca000885 | uncharacterized protein LOC110096403 [Dendrobium catenatum]                        |
| gene-MA16_Dca025898 | 5'&apos;-3&apos;; exoribonuclease 3 [Dendrobium catenatum]                         |
| gene-MA16_Dca012420 | Dynein assembly factor with WDR repeat domains 1 [Dendrobium catenatum]            |
| gene-MA16_Dca004713 | hypothetical protein MA16_Dca004713 [Dendrobium catenatum]                         |
| gene-MA16_Dca010185 | Vacuolar iron transporter like 4 [Dendrobium catenatum]                            |
| gene-MA16_Dca001400 | lecithin-cholesterol acyltransferase-like 4 [Dendrobium catenatum]                 |
| gene-MA16_Dca009426 | mitochondrial uncoupling protein 1 [Dendrobium catenatum]                          |
| gene-MA16_Dca023997 | CBL-interacting protein kinase 32-like isoform X1 [Dendrobium catenatum]           |
| gene-MA16_Dca003182 | exocyst complex component EXO70A1 [Dendrobium catenatum]                           |
| gene-MA16_Dca017222 | protein NETWORKED 4B-like [Dendrobium catenatum]                                   |

|                     |                                                                                    |
|---------------------|------------------------------------------------------------------------------------|
| gene-MA16_Dca024978 | Signal recognition particle 54 kDa protein, chloroplastic [Dendrobium catenatum]   |
| gene-MA16_Dca011869 | Reticulon-like protein B3 [Dendrobium catenatum]                                   |
| gene-MA16_Dca011924 | hypothetical protein MA16_Dca011924 [Dendrobium catenatum]                         |
| gene-MA16_Dca014156 | tubulin-folding cofactor C [Dendrobium catenatum]                                  |
| gene-MA16_Dca007432 | Fanconi anemia group D2 protein-like isoform X1 [Dendrobium catenatum]             |
| gene-MA16_Dca006059 | uncharacterized protein LOC110093267 isoform X1 [Dendrobium catenatum]             |
| gene-MA16_Dca019302 | putative protein phosphatase 2C 63 [Dendrobium catenatum]                          |
| gene-MA16_Dca020345 | uncharacterized protein LOC110113002 [Dendrobium catenatum]                        |
| gene-MA16_Dca004037 | Protein argonaute 1B [Dendrobium catenatum]                                        |
| gene-MA16_Dca013152 | transcription elongation factor TFIIS [Dendrobium catenatum]                       |
| gene-MA16_Dca024050 | protein root UVB sensitive 3 isoform X1 [Dendrobium catenatum]                     |
| gene-MA16_Dca017945 | putative protein phosphatase 2C 1 [Dendrobium catenatum]                           |
| gene-MA16_Dca003872 | Trans-resveratrol di-O-methyltransferase [Dendrobium catenatum]                    |
| gene-MA16_Dca010932 | putative mitochondrial protein [Dendrobium catenatum]                              |
| gene-MA16_Dca018814 | sulfhydryl oxidase 2-like isoform X1 [Dendrobium catenatum]                        |
| gene-MA16_Dca011159 | scarecrow-like protein 23 [Dendrobium catenatum]                                   |
| gene-MA16_Dca003505 | hypothetical protein MA16_Dca003505 [Dendrobium catenatum]                         |
| gene-MA16_Dca020889 | Retrovirus-related Pol polyprotein from transposon TNT 1-94 [Dendrobium catenatum] |
| gene-MA16_Dca024344 | putative TPR repeat-containing protein [Dendrobium catenatum]                      |
| gene-MA16_Dca012844 | hypothetical protein MA16_Dca012844 [Dendrobium catenatum]                         |
| gene-MA16_Dca005545 | hypothetical protein MA16_Dca005545 [Dendrobium catenatum]                         |
| gene-MA16_Dca012254 | F-box protein [Dendrobium catenatum]                                               |
| gene-MA16_Dca000721 | hypothetical protein MA16_Dca000721 [Dendrobium catenatum]                         |
| gene-MA16_Dca010056 | uncharacterized protein LOC110101953 isoform X2 [Dendrobium catenatum]             |
| gene-MA16_Dca011830 | vacuolar protein sorting-associated protein 18 homolog [Dendrobium catenatum]      |
| gene-MA16_Dca023247 | Molybdenum cofactor sulfurase [Dendrobium catenatum]                               |
| gene-MA16_Dca022824 | hypothetical protein MA16_Dca022824 [Dendrobium catenatum]                         |
| gene-MA16_Dca021128 | BURP domain-containing protein 12 [Dendrobium catenatum]                           |
| gene-MA16_Dca012774 | uncharacterized protein LOC110103518 [Dendrobium catenatum]                        |
| gene-MA16_Dca006561 | probable glucuronosyltransferase Os06g0687900 [Dendrobium catenatum]               |

|                     |                                                                                    |
|---------------------|------------------------------------------------------------------------------------|
| gene-MA16_Dca004095 | hypothetical protein MA16_Dca004095 [Dendrobium catenatum]                         |
| gene-MA16_Dca004775 | protein OSCA1-like [Dendrobium catenatum]                                          |
| gene-MA16_Dca016488 | hypothetical protein MA16_Dca016488 [Dendrobium catenatum]                         |
| gene-MA16_Dca013923 | Retrovirus-related Pol polyprotein from transposon TNT 1-94 [Dendrobium catenatum] |
| gene-MA16_Dca004416 | protein PLASTID TRANSCRIPTIONALLY ACTIVE 12 isoform X1 [Dendrobium catenatum]      |
| gene-MA16_Dca016707 | endoglucanase 9-like [Dendrobium catenatum]                                        |
| gene-MA16_Dca027629 | hypothetical protein MA16_Dca027629 [Dendrobium catenatum]                         |
| gene-MA16_Dca006817 | phospholipase A(1) DAD1, chloroplastic [Dendrobium catenatum]                      |
| gene-MA16_Dca026452 | Fatty acyl-CoA reductase 3 [Dendrobium catenatum]                                  |
| gene-MA16_Dca001936 | growth-regulating factor 6-like [Dendrobium catenatum]                             |
| gene-MA16_Dca008127 | ubiquitin carboxyl-terminal hydrolase 3-like [Dendrobium catenatum]                |
| gene-MA16_Dca008125 | putative lysine-specific demethylase ELF6 [Dendrobium catenatum]                   |
| gene-MA16_Dca028949 | hypothetical protein MA16_Dca028949 [Dendrobium catenatum]                         |
| gene-MA16_Dca015009 | putative mitochondrial protein [Dendrobium catenatum]                              |
| gene-MA16_Dca001894 | Magnesium-chelatase subunit ChlD, chloroplastic [Dendrobium catenatum]             |
| gene-MA16_Dca025801 | Retrovirus-related Pol polyprotein from transposon TNT 1-94 [Dendrobium catenatum] |
| gene-MA16_Dca021804 | uncharacterized protein LOC110102133 [Dendrobium catenatum]                        |
| gene-MA16_Dca016056 | leucine-rich repeat extensin-like protein 2 [Dendrobium catenatum]                 |
| gene-MA16_Dca027203 | hypothetical protein MA16_Dca027203 [Dendrobium catenatum]                         |
| gene-MA16_Dca010287 | Retrovirus-related Pol polyprotein from transposon TNT 1-94 [Dendrobium catenatum] |
| gene-MA16_Dca023584 | hypothetical protein MA16_Dca023584 [Dendrobium catenatum]                         |
| gene-MA16_Dca010966 | Remorin [Dendrobium catenatum]                                                     |
| gene-MA16_Dca016860 | uncharacterized protein LOC110116224 isoform X1 [Dendrobium catenatum]             |
| gene-MA16_Dca003379 | protein FAR1-RELATED SEQUENCE 5-like [Dendrobium catenatum]                        |
| gene-MA16_Dca015330 | extracellular signal-regulated kinase 1 isoform X1 [Dendrobium catenatum]          |
| gene-MA16_Dca015159 | Putative ribonuclease H protein [Dendrobium catenatum]                             |
| gene-MA16_Dca019811 | ubiquitin-like-specific protease ESD4 [Dendrobium catenatum]                       |
| gene-MA16_Dca005683 | uncharacterized protein LOC110092832 [Dendrobium catenatum]                        |
| gene-MA16_Dca016373 | hypothetical protein MA16_Dca016373 [Dendrobium catenatum]                         |
| gene-MA16_Dca013535 | putative mitochondrial protein [Dendrobium catenatum]                              |

|                     |                                                                                    |
|---------------------|------------------------------------------------------------------------------------|
| gene-MA16_Dca016419 | F-box/LRR-repeat protein 20-like [Dendrobium catenatum]                            |
| gene-MA16_Dca015563 | hypothetical protein MA16_Dca015563 [Dendrobium catenatum]                         |
| gene-MA16_Dca010144 | Ubiquitin-60S ribosomal protein L40-2 [Dendrobium catenatum]                       |
| gene-MA16_Dca008435 | Putative disease resistance protein RGA3 [Dendrobium catenatum]                    |
| gene-MA16_Dca000308 | uncharacterized protein LOC110111907 [Dendrobium catenatum]                        |
| gene-MA16_Dca005656 | Receptor-like protein kinase HAIKU2 [Dendrobium catenatum]                         |
| gene-MA16_Dca022885 | transcription factor bHLH68 isoform X1 [Dendrobium catenatum]                      |
| gene-MA16_Dca006429 | abscisic acid 8-epoxide-hydroxylase 3 [Dendrobium catenatum]                       |
| gene-MA16_Dca008499 | transcription factor TCP24-like [Dendrobium catenatum]                             |
| gene-MA16_Dca024081 | Malate dehydrogenase 1, mitochondrial [Dendrobium catenatum]                       |
| gene-MA16_Dca013966 | DNA polymerase alpha subunit B [Dendrobium catenatum]                              |
| gene-MA16_Dca010306 | Secologanin synthase [Dendrobium catenatum]                                        |
| gene-MA16_Dca003794 | hypothetical protein MA16_Dca003794 [Dendrobium catenatum]                         |
| gene-MA16_Dca024328 | uncharacterized protein LOC110115567 [Dendrobium catenatum]                        |
| gene-MA16_Dca006666 | CBL-interacting protein kinase 18-like [Dendrobium catenatum]                      |
| gene-MA16_Dca010506 | Retrovirus-related Pol polyprotein from transposon TNT 1-94 [Dendrobium catenatum] |
| gene-MA16_Dca008231 | hypothetical protein MA16_Dca008231 [Dendrobium catenatum]                         |
| gene-MA16_Dca010022 | histidine kinase 5 [Dendrobium catenatum]                                          |
| gene-MA16_Dca010684 | 14 kDa proline-rich protein DC2.15 [Dendrobium catenatum]                          |
| gene-MA16_Dca018560 | hypothetical protein MA16_Dca018560 [Dendrobium catenatum]                         |
| gene-MA16_Dca000121 | peroxidase P7-like [Dendrobium catenatum]                                          |
| gene-MA16_Dca017549 | large proline-rich protein bag6-B isoform X3 [Dendrobium catenatum]                |
| gene-MA16_Dca004013 | Retrovirus-related Pol polyprotein from transposon TNT 1-94 [Dendrobium catenatum] |
| gene-MA16_Dca026000 | hypothetical protein MA16_Dca026000 [Dendrobium catenatum]                         |
| gene-MA16_Dca023432 | ABC transporter G family member 25 [Dendrobium catenatum]                          |
| gene-MA16_Dca020464 | uncharacterized protein LOC110100595 [Dendrobium catenatum]                        |
| gene-MA16_Dca014017 | Cytochrome P450 78A11 [Dendrobium catenatum]                                       |
| gene-MA16_Dca001389 | hypothetical protein MA16_Dca001389 [Dendrobium catenatum]                         |
| gene-MA16_Dca001377 | dnaJ homolog subfamily B member 13-like [Dendrobium catenatum]                     |
| gene-MA16_Dca028745 | Serine/threonine-protein phosphatase 7 long form like [Dendrobium catenatum]       |

|                     |                                                                                                                 |
|---------------------|-----------------------------------------------------------------------------------------------------------------|
| gene-MA16_Dca026850 | hypothetical protein MA16_Dca026850 [Dendrobium catenatum]                                                      |
| gene-MA16_Dca018330 | uncharacterized protein LOC110105762 isoform X1 [Dendrobium catenatum]                                          |
| gene-MA16_Dca006125 | dnaJ homolog subfamily C member 2 [Dendrobium catenatum]                                                        |
| gene-MA16_Dca013294 | Putative disease resistance protein RGA4 [Dendrobium catenatum]                                                 |
| gene-MA16_Dca006326 | plastidic ATP/ADP-transporter-like [Dendrobium catenatum]                                                       |
| gene-MA16_Dca025965 | endoglucanase 17-like [Dendrobium catenatum]                                                                    |
| gene-MA16_Dca006033 | uncharacterized protein At1g04910-like [Dendrobium catenatum]                                                   |
| gene-MA16_Dca000483 | endoribonuclease Dicer homolog 2a-like [Dendrobium catenatum]                                                   |
| gene-MA16_Dca024599 | putative pentatricopeptide repeat-containing protein At3g25060, mitochondrial isoform X1 [Dendrobium catenatum] |
| gene-MA16_Dca023412 | protein NRT1/ PTR FAMILY 4.4-like [Dendrobium catenatum]                                                        |
| gene-MA16_Dca007135 | Zinc finger protein HD1 [Dendrobium catenatum]                                                                  |
| gene-MA16_Dca007455 | hypothetical protein MA16_Dca007455 [Dendrobium catenatum]                                                      |
| gene-MA16_Dca018586 | hypothetical protein MA16_Dca018586 [Dendrobium catenatum]                                                      |
| gene-MA16_Dca018922 | pentatricopeptide repeat-containing protein At5g56310 [Dendrobium catenatum]                                    |
| gene-MA16_Dca002003 | homeobox-DDT domain protein RLT2-like isoform X2 [Dendrobium catenatum]                                         |
| gene-MA16_Dca024854 | Serine/threonine-protein kinase Nek2 [Dendrobium catenatum]                                                     |
| gene-MA16_Dca023206 | putative leucine-rich repeat receptor-like protein kinase [Dendrobium catenatum]                                |
| gene-MA16_Dca007667 | hypothetical protein MA16_Dca007667 [Dendrobium catenatum]                                                      |
| gene-MA16_Dca015443 | Phosphoenolpyruvate carboxykinase [ATP] [Dendrobium catenatum]                                                  |
| gene-MA16_Dca023515 | hypothetical protein MA16_Dca023515 [Dendrobium catenatum]                                                      |
| gene-MA16_Dca022858 | pentatricopeptide repeat-containing protein At4g15720-like [Dendrobium catenatum]                               |
| gene-MA16_Dca007198 | U3 small nucleolar ribonucleoprotein protein MPP10 [Dendrobium catenatum]                                       |
| gene-MA16_Dca014134 | FAD synthetase [Dendrobium catenatum]                                                                           |
| gene-MA16_Dca019107 | Putative disease resistance RPP13-like protein 1 [Dendrobium catenatum]                                         |
| gene-MA16_Dca012435 | alpha,alpha-trehalose-phosphate synthase [UDP-forming] 1-like [Dendrobium catenatum]                            |
| gene-MA16_Dca012251 | Receptor-like serine/threonine-protein kinase SD1-8 [Dendrobium catenatum]                                      |
| gene-MA16_Dca003873 | hypothetical protein MA16_Dca003873 [Dendrobium catenatum]                                                      |
| gene-MA16_Dca026235 | hypothetical protein MA16_Dca026235 [Dendrobium catenatum]                                                      |
| gene-MA16_Dca022185 | uncharacterized protein LOC110112447 isoform X1 [Dendrobium catenatum]                                          |
| gene-MA16_Dca016371 | L-type lectin-domain containing receptor kinase IX.1-like [Dendrobium catenatum]                                |

|                     |                                                                                             |
|---------------------|---------------------------------------------------------------------------------------------|
| gene-MA16_Dca000943 | putative aarF domain-containing protein kinase [Dendrobium catenatum]                       |
| gene-MA16_Dca009014 | BTB/POZ domain-containing protein At5g67385 [Dendrobium catenatum]                          |
| gene-MA16_Dca020882 | transcription factor MYBS3-like [Dendrobium catenatum]                                      |
| gene-MA16_Dca008768 | adenine/guanine permease AZG1 [Dendrobium catenatum]                                        |
| gene-MA16_Dca012826 | hypothetical protein MA16_Dca012826 [Dendrobium catenatum]                                  |
| gene-MA16_Dca007417 | two-component response regulator ORR9-like [Dendrobium catenatum]                           |
| gene-MA16_Dca019188 | hypothetical protein MA16_Dca019188 [Dendrobium catenatum]                                  |
| gene-MA16_Dca012870 | DNA excision repair protein ERCC-1 [Dendrobium catenatum]                                   |
| gene-MA16_Dca016432 | hypothetical protein MA16_Dca016432 [Dendrobium catenatum]                                  |
| gene-MA16_Dca012177 | FACT complex subunit SPT16 [Dendrobium catenatum]                                           |
| gene-MA16_Dca019039 | uncharacterized protein LOC110103721 [Dendrobium catenatum]                                 |
| gene-MA16_Dca004007 | uncharacterized protein LOC110097597 [Dendrobium catenatum]                                 |
| gene-MA16_Dca021333 | hypothetical protein MA16_Dca021333 [Dendrobium catenatum]                                  |
| gene-MA16_Dca000698 | pentatricopeptide repeat-containing protein At3g49240-like [Dendrobium catenatum]           |
| gene-MA16_Dca010826 | protein CELLULOSE SYNTHASE INTERACTIVE 3 [Dendrobium catenatum]                             |
| gene-MA16_Dca027730 | hypothetical protein MA16_Dca027730 [Dendrobium catenatum]                                  |
| gene-MA16_Dca011968 | phosphoinositide phosphatase SAC2-like [Dendrobium catenatum]                               |
| gene-MA16_Dca015376 | hypothetical protein MA16_Dca015376 [Dendrobium catenatum]                                  |
| gene-MA16_Dca011782 | CLP protease regulatory subunit CLPX1, mitochondrial-like isoform X1 [Dendrobium catenatum] |
| gene-MA16_Dca002029 | hypothetical protein MA16_Dca002029 [Dendrobium catenatum]                                  |
| gene-MA16_Dca011627 | hypothetical protein MA16_Dca011627 [Dendrobium catenatum]                                  |
| gene-MA16_Dca018453 | hypothetical protein MA16_Dca018453 [Dendrobium catenatum]                                  |
| gene-MA16_Dca026877 | zinc finger protein BRUTUS-like [Dendrobium catenatum]                                      |
| gene-MA16_Dca013924 | putative disease resistance protein RGA3 [Dendrobium catenatum]                             |
| gene-MA16_Dca022831 | Cytochrome b-c1 complex subunit Rieske, mitochondrial [Dendrobium catenatum]                |
| gene-MA16_Dca026271 | Receptor-like protein 12 [Dendrobium catenatum]                                             |
| gene-MA16_Dca012102 | BRI1 kinase inhibitor 1-like [Dendrobium catenatum]                                         |
| gene-MA16_Dca005930 | hypothetical protein MA16_Dca005930 [Dendrobium catenatum]                                  |
| gene-MA16_Dca005479 | exocyst complex component EXO84B-like [Dendrobium catenatum]                                |
| gene-MA16_Dca019222 | Growth-regulating factor 1 [Dendrobium catenatum]                                           |

|                     |                                                                                             |
|---------------------|---------------------------------------------------------------------------------------------|
| gene-MA16_Dca014123 | LOB domain-containing protein 29 [Dendrobium catenatum]                                     |
| gene-MA16_Dca002451 | Cysteine-rich receptor-like protein kinase 42 [Dendrobium catenatum]                        |
| gene-MA16_Dca012461 | pentatricopeptide repeat-containing protein At1g73400, mitochondrial [Dendrobium catenatum] |
| gene-MA16_Dca017815 | 3-dehydrosphinganine reductase TSC10A-like [Dendrobium catenatum]                           |
| gene-MA16_Dca024966 | Mediator of RNA polymerase II transcription subunit 23 [Dendrobium catenatum]               |
| gene-MA16_Dca010619 | putative anion transporter 4, chloroplastic [Dendrobium catenatum]                          |
| gene-MA16_Dca006453 | uncharacterized protein LOC110098806 isoform X2 [Dendrobium catenatum]                      |
| gene-MA16_Dca020020 | LOB domain-containing protein 6-like [Dendrobium catenatum]                                 |
| gene-MA16_Dca009122 | Retrovirus-related Pol polyprotein from transposon TNT 1-94 [Dendrobium catenatum]          |
| gene-MA16_Dca018409 | probable protein phosphatase 2C 6 [Dendrobium catenatum]                                    |
| gene-MA16_Dca015263 | 31 kDa ribonucleoprotein, chloroplastic [Dendrobium catenatum]                              |
| gene-MA16_Dca003077 | protein SOMBRERO-like [Dendrobium catenatum]                                                |
| gene-MA16_Dca009926 | squamosa promoter-binding-like protein 12 isoform X1 [Dendrobium catenatum]                 |
| gene-MA16_Dca018009 | hypothetical protein MA16_Dca018009 [Dendrobium catenatum]                                  |
| gene-MA16_Dca023796 | calcium-transporting ATPase 1, plasma membrane-type-like isoform X1 [Dendrobium catenatum]  |
| gene-MA16_Dca023812 | hypothetical protein MA16_Dca023812 [Dendrobium catenatum]                                  |
| gene-MA16_Dca001249 | lanC-like protein GCL2 [Dendrobium catenatum]                                               |
| gene-MA16_Dca014208 | hypothetical protein MA16_Dca014208 [Dendrobium catenatum]                                  |
| gene-MA16_Dca018597 | hypothetical protein MA16_Dca018597 [Dendrobium catenatum]                                  |
| gene-MA16_Dca011616 | Nuclear transcription factor Y subunit A-6 [Dendrobium catenatum]                           |
| gene-MA16_Dca022134 | hypothetical protein MA16_Dca022134 [Dendrobium catenatum]                                  |
| gene-MA16_Dca006230 | uncharacterized protein LOC110111645 isoform X1 [Dendrobium catenatum]                      |
| gene-MA16_Dca029082 | Cannabidiolic acid synthase [Dendrobium catenatum]                                          |
| gene-MA16_Dca009393 | hypothetical protein MA16_Dca009393 [Dendrobium catenatum]                                  |
| gene-MA16_Dca024439 | tubulin beta chain [Dendrobium catenatum]                                                   |
| gene-MA16_Dca026893 | hypothetical protein MA16_Dca026893 [Dendrobium catenatum]                                  |
| gene-MA16_Dca001659 | U-box domain-containing protein 35-like isoform X1 [Dendrobium catenatum]                   |
| gene-MA16_Dca005939 | hypothetical protein MA16_Dca005939 [Dendrobium catenatum]                                  |
| gene-MA16_Dca011510 | putative exocyst complex component 4 [Dendrobium catenatum]                                 |
| gene-MA16_Dca006167 | uncharacterized protein LOC110099950 [Dendrobium catenatum]                                 |

|                     |                                                                                    |
|---------------------|------------------------------------------------------------------------------------|
| gene-MA16_Dca005089 | hypothetical protein MA16_Dca005089 [Dendrobium catenatum]                         |
| gene-MA16_Dca023733 | Retrovirus-related Pol polyprotein from transposon TNT 1-94 [Dendrobium catenatum] |
| gene-MA16_Dca008604 | isoleucyl-tRNA synthetase [Dendrobium catenatum]                                   |
| gene-MA16_Dca009173 | Protein FAR1-RELATED SEQUENCE 5 [Dendrobium catenatum]                             |
| gene-MA16_Dca000014 | UDP-glycosyltransferase 89B1 [Dendrobium catenatum]                                |
| gene-MA16_Dca000639 | Serine/threonine-protein phosphatase PP1 [Dendrobium catenatum]                    |
| gene-MA16_Dca007171 | Clustered mitochondria protein [Dendrobium catenatum]                              |
| gene-MA16_Dca015814 | reticuline oxidase-like [Dendrobium catenatum]                                     |
| gene-MA16_Dca023178 | CASP-like protein [Dendrobium catenatum]                                           |
| gene-MA16_Dca016806 | universal stress protein PHOS32 [Dendrobium catenatum]                             |
| gene-MA16_Dca014097 | zinc-finger homeodomain protein 4-like [Dendrobium catenatum]                      |
| gene-MA16_Dca016510 | Potassium channel AKT6 [Dendrobium catenatum]                                      |
| gene-MA16_Dca011314 | hypothetical protein MA16_Dca011314 [Dendrobium catenatum]                         |
| gene-MA16_Dca018703 | RNA-directed DNA polymerase [Dendrobium catenatum]                                 |
| gene-MA16_Dca028665 | hypothetical protein MA16_Dca028665 [Dendrobium catenatum]                         |
| gene-MA16_Dca002651 | hypothetical protein MA16_Dca002651 [Dendrobium catenatum]                         |
| gene-MA16_Dca005730 | Pantothenate kinase 2 [Dendrobium catenatum]                                       |
| gene-MA16_Dca008222 | ETHYLENE INSENSITIVE 3-like 1 protein [Dendrobium catenatum]                       |
| gene-MA16_Dca004998 | probable WRKY transcription factor 2 isoform X1 [Dendrobium catenatum]             |
| gene-MA16_Dca019218 | probable serine/threonine-protein kinase PBL17 [Dendrobium catenatum]              |
| gene-MA16_Dca027391 | hypothetical protein MA16_Dca027391 [Dendrobium catenatum]                         |
| gene-MA16_Dca005512 | uncharacterized protein LOC110095435 [Dendrobium catenatum]                        |
| gene-MA16_Dca022492 | hypothetical protein MA16_Dca022492 [Dendrobium catenatum]                         |
| gene-MA16_Dca010295 | Protein FAR1-RELATED SEQUENCE 5 [Dendrobium catenatum]                             |
| gene-MA16_Dca017059 | zinc protease PQQ-Like [Dendrobium catenatum]                                      |
| gene-MA16_Dca008510 | putative leucine-rich repeat receptor-like protein kinase [Dendrobium catenatum]   |
| gene-MA16_Dca017007 | ubiquitin-like domain-containing CTD phosphatase [Dendrobium catenatum]            |
| gene-MA16_Dca002762 | 60S acidic ribosomal protein P0-2 [Dendrobium catenatum]                           |
| gene-MA16_Dca013211 | putative nitrite transporter [Dendrobium catenatum]                                |
| gene-MA16_Dca025776 | Cytochrome c oxidase subunit 6a, mitochondrial [Dendrobium catenatum]              |



|                     |                                                                                            |
|---------------------|--------------------------------------------------------------------------------------------|
| gene-MA16_Dca002053 | embryogenesis-associated protein EMB8-like [Dendrobium catenatum]                          |
| gene-MA16_Dca003771 | hypothetical protein MA16_Dca003771 [Dendrobium catenatum]                                 |
| gene-MA16_Dca017393 | C-type lectin receptor-like tyrosine-protein kinase At1g52310 [Dendrobium catenatum]       |
| gene-MA16_Dca015000 | Protein SCARECROW [Dendrobium catenatum]                                                   |
| gene-MA16_Dca002893 | hypothetical protein MA16_Dca002893 [Dendrobium catenatum]                                 |
| gene-MA16_Dca027852 | MADS-box transcription factor 21 [Dendrobium catenatum]                                    |
| gene-MA16_Dca005787 | Pentatricopeptide repeat-containing protein [Dendrobium catenatum]                         |
| gene-MA16_Dca010315 | ribosome biogenesis protein WDR12 homolog isoform X1 [Dendrobium catenatum]                |
| gene-MA16_Dca020908 | Pentatricopeptide repeat-containing protein [Dendrobium catenatum]                         |
| gene-MA16_Dca012104 | probable protein phosphatase 2C 12 [Dendrobium catenatum]                                  |
| gene-MA16_Dca007408 | hypothetical protein MA16_Dca007408 [Dendrobium catenatum]                                 |
| gene-MA16_Dca002199 | Disease resistance protein RGA2 [Dendrobium catenatum]                                     |
| gene-MA16_Dca013949 | hypothetical protein MA16_Dca013949 [Dendrobium catenatum]                                 |
| gene-MA16_Dca018547 | protein S-acyltransferase 18 [Dendrobium catenatum]                                        |
| gene-MA16_Dca009428 | Putative ataxin-3 like [Dendrobium catenatum]                                              |
| gene-MA16_Dca013084 | plant intracellular Ras-group-related LRR protein 3-like [Dendrobium catenatum]            |
| gene-MA16_Dca007613 | S-norcoclaurine synthase 1-like [Dendrobium catenatum]                                     |
| gene-MA16_Dca004667 | Helicase protein MOM1 [Dendrobium catenatum]                                               |
| gene-MA16_Dca006907 | Histidine--tRNA ligase [Dendrobium catenatum]                                              |
| gene-MA16_Dca010206 | hydroquinone glucosyltransferase-like [Dendrobium catenatum]                               |
| gene-MA16_Dca026264 | uncharacterized protein LOC110115093 isoform X1 [Dendrobium catenatum]                     |
| gene-MA16_Dca024941 | uncharacterized protein LOC110093954 [Dendrobium catenatum]                                |
| gene-MA16_Dca024581 | hypothetical protein MA16_Dca024581 [Dendrobium catenatum]                                 |
| gene-MA16_Dca017287 | multisite-specific tRNA:(cytosine-C5)-methyltransferase [Dendrobium catenatum]             |
| gene-MA16_Dca007605 | formyltetrahydrofolate deformylase 2, mitochondrial-like isoform X2 [Dendrobium catenatum] |
| gene-MA16_Dca004723 | Protein CCA1 [Dendrobium catenatum]                                                        |
| gene-MA16_Dca013578 | 125 kDa kinesin-related protein [Dendrobium catenatum]                                     |
| gene-MA16_Dca005087 | putative metal-nicotianamine transporter YSL9 [Dendrobium catenatum]                       |
| gene-MA16_Dca010354 | protein IQ-DOMAIN 1-like [Dendrobium catenatum]                                            |
| gene-MA16_Dca026923 | transcription factor bHLH53-like [Dendrobium catenatum]                                    |

|                     |                                                                                                                      |
|---------------------|----------------------------------------------------------------------------------------------------------------------|
| gene-MA16_Dca023756 | hypothetical protein MA16_Dca023756 [Dendrobium catenatum]                                                           |
| gene-MA16_Dca005261 | hypothetical protein MA16_Dca005261 [Dendrobium catenatum]                                                           |
| gene-MA16_Dca006515 | elongation factor 2 [Dendrobium catenatum]                                                                           |
| gene-MA16_Dca021294 | hypothetical protein MA16_Dca021294 [Dendrobium catenatum]                                                           |
| gene-MA16_Dca023691 | Anthranilate synthase component I-1, chloroplastic [Dendrobium catenatum]                                            |
| gene-MA16_Dca006593 | hypothetical protein MA16_Dca006593 [Dendrobium catenatum]                                                           |
| gene-MA16_Dca009467 | methylthioribose-1-phosphate isomerase isoform X1 [Dendrobium catenatum]                                             |
| gene-MA16_Dca013400 | MAG2-interacting protein 2 isoform X2 [Dendrobium catenatum]                                                         |
| gene-MA16_Dca021828 | Petal death protein [Dendrobium catenatum]                                                                           |
| gene-MA16_Dca018795 | hypothetical protein MA16_Dca018795 [Dendrobium catenatum]                                                           |
| gene-MA16_Dca019234 | putative acyl-[acyl-carrier-protein]-UDP-N-acetylglucosamine O-acyltransferase, mitochondrial [Dendrobium catenatum] |
| gene-MA16_Dca001003 | F-box protein At3g54460 isoform X1 [Dendrobium catenatum]                                                            |
| gene-MA16_Dca015057 | pectinesterase-like [Dendrobium catenatum]                                                                           |
| gene-MA16_Dca001580 | CSC1-like protein At1g32090 [Dendrobium catenatum]                                                                   |
| gene-MA16_Dca016369 | protein CHROMATIN REMODELING 4-like [Dendrobium catenatum]                                                           |
| gene-MA16_Dca011246 | TBC1 domain family member 15-like [Dendrobium catenatum]                                                             |
| gene-MA16_Dca020471 | Indole-3-pyruvate monooxygenase YUCCA2 [Dendrobium catenatum]                                                        |
| gene-MA16_Dca016841 | hypothetical protein MA16_Dca016841 [Dendrobium catenatum]                                                           |
| gene-MA16_Dca005406 | hypothetical protein MA16_Dca005406 [Dendrobium catenatum]                                                           |
| gene-MA16_Dca001258 | probable LRR receptor-like serine/threonine-protein kinase At1g34110 isoform X1 [Dendrobium catenatum]               |
| gene-MA16_Dca022681 | putative mitochondrial protein [Dendrobium catenatum]                                                                |
| gene-MA16_Dca004912 | zinc finger CCCH domain-containing protein ZFN-like isoform X1 [Dendrobium catenatum]                                |
| gene-MA16_Dca012624 | hypothetical protein MA16_Dca012624 [Dendrobium catenatum]                                                           |
| gene-MA16_Dca019395 | osmotin-like protein [Dendrobium catenatum]                                                                          |
| gene-MA16_Dca005574 | syndetin isoform X1 [Dendrobium catenatum]                                                                           |
| gene-MA16_Dca028781 | hypothetical protein MA16_Dca028781 [Dendrobium catenatum]                                                           |
| gene-MA16_Dca006933 | Retrovirus-related Pol polyprotein from transposon TNT 1-94 [Dendrobium catenatum]                                   |
| gene-MA16_Dca016668 | uncharacterized protein At1g10890-like [Dendrobium catenatum]                                                        |
| gene-MA16_Dca005761 | transcription factor EGL1-like [Dendrobium catenatum]                                                                |
| gene-MA16_Dca022323 | E3 ubiquitin-protein ligase SHPRH isoform X1 [Dendrobium catenatum]                                                  |

|                     |                                                                                                        |
|---------------------|--------------------------------------------------------------------------------------------------------|
| gene-MA16_Dca011294 | pentatricopeptide repeat-containing protein At1g71210 [Dendrobium catenatum]                           |
| gene-MA16_Dca000406 | Disease resistance protein RGA2 [Dendrobium catenatum]                                                 |
| gene-MA16_Dca015968 | elongator complex protein 1 [Dendrobium catenatum]                                                     |
| gene-MA16_Dca027828 | Disease resistance protein RGA2 [Dendrobium catenatum]                                                 |
| gene-MA16_Dca006530 | uncharacterized protein At2g40430 [Dendrobium catenatum]                                               |
| gene-MA16_Dca008684 | hypothetical protein MA16_Dca008684 [Dendrobium catenatum]                                             |
| gene-MA16_Dca000222 | hypothetical protein MA16_Dca000222 [Dendrobium catenatum]                                             |
| gene-MA16_Dca013496 | Purine permease 3 [Dendrobium catenatum]                                                               |
| gene-MA16_Dca000598 | uncharacterized protein LOC110112334 [Dendrobium catenatum]                                            |
| gene-MA16_Dca012306 | pre-mRNA-splicing factor ATP-dependent RNA helicase DEAH10-like [Dendrobium catenatum]                 |
| gene-MA16_Dca005791 | putative receptor-like protein kinase [Dendrobium catenatum]                                           |
| gene-MA16_Dca020985 | Putative ribonuclease H protein [Dendrobium catenatum]                                                 |
| gene-MA16_Dca025963 | histone-lysine N-methyltransferase setd3 [Dendrobium catenatum]                                        |
| gene-MA16_Dca001761 | Retrovirus-related Pol polyprotein from transposon TNT 1-94 [Dendrobium catenatum]                     |
| gene-MA16_Dca017910 | LOW QUALITY PROTEIN: pentatricopeptide repeat-containing protein At5g39710-like [Dendrobium catenatum] |
| gene-MA16_Dca018154 | WUSCHEL-related homeobox 11 [Dendrobium catenatum]                                                     |
| gene-MA16_Dca009028 | hypothetical protein MA16_Dca009028 [Dendrobium catenatum]                                             |
| gene-MA16_Dca005517 | Transcription factor GTE12 [Dendrobium catenatum]                                                      |
| gene-MA16_Dca017961 | fibroblast growth factor receptor 1-like [Dendrobium catenatum]                                        |
| gene-MA16_Dca001496 | Lysine-specific histone demethylase 1 like 2 [Dendrobium catenatum]                                    |
| gene-MA16_Dca008181 | hypothetical protein MA16_Dca008181 [Dendrobium catenatum]                                             |
| gene-MA16_Dca001379 | NAC domain-containing protein 73-like [Dendrobium catenatum]                                           |
| gene-MA16_Dca019567 | Strictosidine synthase 1 [Dendrobium catenatum]                                                        |
| gene-MA16_Dca013734 | F-box protein FBX14 [Dendrobium catenatum]                                                             |
| gene-MA16_Dca019290 | hypothetical protein MA16_Dca019290 [Dendrobium catenatum]                                             |
| gene-MA16_Dca012297 | hypothetical protein MA16_Dca012297 [Dendrobium catenatum]                                             |
| gene-MA16_Dca008674 | Histone-lysine N-methyltransferase ASHH1 [Dendrobium catenatum]                                        |
| gene-MA16_Dca011171 | hypothetical protein MA16_Dca011171 [Dendrobium catenatum]                                             |
| gene-MA16_Dca007639 | hypothetical protein MA16_Dca007639 [Dendrobium catenatum]                                             |
| gene-MA16_Dca000668 | sorting nexin 2B-like isoform X2 [Dendrobium catenatum]                                                |

|                     |                                                                                         |
|---------------------|-----------------------------------------------------------------------------------------|
| gene-MA16_Dca020389 | Uncharacterized protein MA16_Dca020389 [Dendrobium catenatum]                           |
| gene-MA16_Dca011457 | probable apyrase 1 isoform X2 [Dendrobium catenatum]                                    |
| gene-MA16_Dca012047 | CST complex subunit CTC1 isoform X1 [Dendrobium catenatum]                              |
| gene-MA16_Dca002587 | NAC transcription factor 47-like [Dendrobium catenatum]                                 |
| gene-MA16_Dca026145 | uncharacterized protein LOC110109109 [Dendrobium catenatum]                             |
| gene-MA16_Dca014751 | limonoid UDP-glucosyltransferase-like [Dendrobium catenatum]                            |
| gene-MA16_Dca001901 | ubiquitin carboxyl-terminal hydrolase 24 [Dendrobium catenatum]                         |
| gene-MA16_Dca023413 | auxin response factor 7-like [Dendrobium catenatum]                                     |
| gene-MA16_Dca022435 | dehydrodolichyl diphosphate synthase 2-like [Dendrobium catenatum]                      |
| gene-MA16_Dca002770 | RNA exonuclease 1 [Dendrobium catenatum]                                                |
| gene-MA16_Dca025836 | putative mitochondrial protein [Dendrobium catenatum]                                   |
| gene-MA16_Dca001016 | probable calcium-binding protein CML10 [Dendrobium catenatum]                           |
| gene-MA16_Dca018282 | Pentatricopeptide repeat-containing protein [Dendrobium catenatum]                      |
| gene-MA16_Dca016085 | phosphoenolpyruvate/phosphate translocator 2, chloroplastic [Dendrobium catenatum]      |
| gene-MA16_Dca026118 | hypothetical protein MA16_Dca026118 [Dendrobium catenatum]                              |
| gene-MA16_Dca001815 | hypothetical protein MA16_Dca001815 [Dendrobium catenatum]                              |
| gene-MA16_Dca000408 | Putative disease resistance protein RGA4 [Dendrobium catenatum]                         |
| gene-MA16_Dca003012 | uncharacterized protein LOC110106860 isoform X2 [Dendrobium catenatum]                  |
| gene-MA16_Dca022315 | hypothetical protein MA16_Dca022315 [Dendrobium catenatum]                              |
| gene-MA16_Dca019975 | probable serine/threonine-protein kinase DDB_G0276461 isoform X2 [Dendrobium catenatum] |
| gene-MA16_Dca011459 | putative leucine-rich repeat receptor-like protein kinase [Dendrobium catenatum]        |
| gene-MA16_Dca012305 | Chromatin structure-remodeling complex protein SYD [Dendrobium catenatum]               |
| gene-MA16_Dca003212 | uncharacterized protein LOC110113433 [Dendrobium catenatum]                             |
| gene-MA16_Dca026111 | hypothetical protein MA16_Dca026111 [Dendrobium catenatum]                              |
| gene-MA16_Dca023054 | hypothetical protein MA16_Dca023054 [Dendrobium catenatum]                              |
| gene-MA16_Dca010217 | heat stress transcription factor A-4b-like [Dendrobium catenatum]                       |
| gene-MA16_Dca028025 | 60S acidic ribosomal protein P0-3 [Dendrobium catenatum]                                |
| gene-MA16_Dca021782 | Peptide methionine sulfoxide reductase B1, chloroplastic [Dendrobium catenatum]         |
| gene-MA16_Dca012371 | hypothetical protein MA16_Dca012371 [Dendrobium catenatum]                              |
| gene-MA16_Dca012093 | ABSCISIC ACID-INSENSITIVE 5-like protein 5 [Dendrobium catenatum]                       |

|                     |                                                                                    |
|---------------------|------------------------------------------------------------------------------------|
| gene-MA16_Dca028017 | hypothetical protein MA16_Dca028017 [Dendrobium catenatum]                         |
| gene-MA16_Dca026494 | Acyl carrier protein 2, mitochondrial [Dendrobium catenatum]                       |
| gene-MA16_Dca018025 | endoribonuclease Dicer homolog 1 [Dendrobium catenatum]                            |
| gene-MA16_Dca002897 | U2 small nuclear ribonucleoprotein B&apos;&apos; [Dendrobium catenatum]            |
| gene-MA16_Dca024985 | Uncharacterized protein MA16_Dca024985 [Dendrobium catenatum]                      |
| gene-MA16_Dca011813 | E3 ubiquitin-protein ligase BRE1-like 1 [Dendrobium catenatum]                     |
| gene-MA16_Dca025882 | hypothetical protein MA16_Dca025882 [Dendrobium catenatum]                         |
| gene-MA16_Dca019871 | hypothetical protein MA16_Dca019871 [Dendrobium catenatum]                         |
| gene-MA16_Dca016917 | cinnamoyl-CoA reductase-like SNL6 [Dendrobium catenatum]                           |
| gene-MA16_Dca017621 | Gibberellin 2-beta-dioxygenase [Dendrobium catenatum]                              |
| gene-MA16_Dca009084 | uncharacterized protein LOC110115781 [Dendrobium catenatum]                        |
| gene-MA16_Dca009790 | Putative disease resistance protein RGA1 [Dendrobium catenatum]                    |
| gene-MA16_Dca027946 | hypothetical protein MA16_Dca027946 [Dendrobium catenatum]                         |
| gene-MA16_Dca028230 | hypothetical protein MA16_Dca028230 [Dendrobium catenatum]                         |
| gene-MA16_Dca002276 | uncharacterized protein LOC110104350 [Dendrobium catenatum]                        |
| gene-MA16_Dca003052 | Retrovirus-related Pol polyprotein from transposon TNT 1-94 [Dendrobium catenatum] |
| gene-MA16_Dca015047 | steroid 5-alpha-reductase DET2 isoform X1 [Dendrobium catenatum]                   |
| gene-MA16_Dca019707 | Retrovirus-related Pol polyprotein from transposon TNT 1-94 [Dendrobium catenatum] |
| gene-MA16_Dca020272 | putative E3 ubiquitin-protein ligase ARI9 [Dendrobium catenatum]                   |
| gene-MA16_Dca022787 | hypothetical protein MA16_Dca022787 [Dendrobium catenatum]                         |
| gene-MA16_Dca020204 | uncharacterized protein LOC110105715 isoform X3 [Dendrobium catenatum]             |
| gene-MA16_Dca002020 | mitogen-activated protein kinase kinase 6-like [Dendrobium catenatum]              |
| gene-MA16_Dca028002 | Retrovirus-related Pol polyprotein from transposon TNT 1-94 [Dendrobium catenatum] |
| gene-MA16_Dca009622 | Retrovirus-related Pol polyprotein from transposon TNT 1-94 [Dendrobium catenatum] |
| gene-MA16_Dca001290 | protein NETWORKED 1D-like [Dendrobium catenatum]                                   |
| gene-MA16_Dca021141 | Protein NSP-INTERACTING KINASE 1 [Dendrobium catenatum]                            |
| gene-MA16_Dca011698 | E3 ubiquitin-protein ligase MARCH6 [Dendrobium catenatum]                          |
| gene-MA16_Dca024989 | ESF1 homolog [Dendrobium catenatum]                                                |
| gene-MA16_Dca000275 | hypothetical protein MA16_Dca000275 [Dendrobium catenatum]                         |
| gene-MA16_Dca015884 | Auxin response factor 12 [Dendrobium catenatum]                                    |

|                     |                                                                                                   |
|---------------------|---------------------------------------------------------------------------------------------------|
| gene-MA16_Dca022075 | Retrovirus-related Pol polyprotein from transposon TNT 1-94 [Dendrobium catenatum]                |
| gene-MA16_Dca016023 | protein NRT1/ PTR FAMILY 7.2-like isoform X1 [Dendrobium catenatum]                               |
| gene-MA16_Dca005206 | hypothetical protein MA16_Dca005206 [Dendrobium catenatum]                                        |
| gene-MA16_Dca013489 | E3 ubiquitin-protein ligase ATL31-like [Dendrobium catenatum]                                     |
| gene-MA16_Dca007576 | LRR repeats and ubiquitin-like domain-containing protein [Dendrobium catenatum]                   |
| gene-MA16_Dca004513 | putative sulfate transporter 3.4 [Dendrobium catenatum]                                           |
| gene-MA16_Dca008220 | putative LRR receptor-like serine/threonine-protein kinase [Dendrobium catenatum]                 |
| gene-MA16_Dca022401 | Putative ribonuclease H protein [Dendrobium catenatum]                                            |
| gene-MA16_Dca022271 | glutamate decarboxylase-like [Dendrobium catenatum]                                               |
| gene-MA16_Dca013322 | Actin-depolymerizing factor [Dendrobium catenatum]                                                |
| gene-MA16_Dca014450 | acetylornithine aminotransferase, mitochondrial [Dendrobium catenatum]                            |
| gene-MA16_Dca015731 | transcriptional activator DEMETER-like isoform X1 [Dendrobium catenatum]                          |
| gene-MA16_Dca010708 | Aluminum-activated malate transporter 10 [Dendrobium catenatum]                                   |
| gene-MA16_Dca023672 | E3 ubiquitin-protein ligase RFWD3-like isoform X2 [Dendrobium catenatum]                          |
| gene-MA16_Dca024729 | putative pentatricopeptide repeat-containing protein At1g19290 [Dendrobium catenatum]             |
| gene-MA16_Dca019401 | protein argonaute 1A-like [Dendrobium catenatum]                                                  |
| gene-MA16_Dca005860 | Putative protease Do-like 14 [Dendrobium catenatum]                                               |
| gene-MA16_Dca003477 | disease resistance protein RGA2-like [Dendrobium catenatum]                                       |
| gene-MA16_Dca000260 | Uncharacterized protein MA16_Dca000260 [Dendrobium catenatum]                                     |
| gene-MA16_Dca022668 | vesicle-associated membrane protein 724-like [Dendrobium catenatum]                               |
| gene-MA16_Dca013080 | Retrovirus-related Pol polyprotein from transposon TNT 1-94 [Dendrobium catenatum]                |
| gene-MA16_Dca018108 | vacuolar protein sorting-associated protein 41 homolog isoform X1 [Dendrobium catenatum]          |
| gene-MA16_Dca022795 | pyrophosphate--fructose 6-phosphate 1-phosphotransferase subunit beta-like [Dendrobium catenatum] |
| gene-MA16_Dca003956 | hypothetical protein MA16_Dca003956 [Dendrobium catenatum]                                        |
| gene-MA16_Dca019882 | protein TPLATE [Dendrobium catenatum]                                                             |
| gene-MA16_Dca018979 | uncharacterized protein LOC110105902 isoform X1 [Dendrobium catenatum]                            |
| gene-MA16_Dca011983 | Alpha-aminoadipic semialdehyde synthase [Dendrobium catenatum]                                    |
| gene-MA16_Dca009131 | transmembrane 9 superfamily member 7-like [Dendrobium catenatum]                                  |
| gene-MA16_Dca018928 | Myb family transcription factor APL [Dendrobium catenatum]                                        |
| gene-MA16_Dca000871 | Peptidyl-prolyl cis-trans isomerase CYP19-4 [Dendrobium catenatum]                                |

gene-MA16\_Dca004695 60S ribosomal protein L13a-4 [Dendrobium catenatum]  
gene-MA16\_Dca012938 hypothetical protein MA16\_Dca012938 [Dendrobium catenatum]  
gene-MA16\_Dca003354 hypothetical protein MA16\_Dca003354 [Dendrobium catenatum]  
gene-MA16\_Dca016890 COP9 signalosome complex subunit 8 isoform X2 [Dendrobium catenatum]  
gene-MA16\_Dca020253 Rho GDP-dissociation inhibitor 1 [Dendrobium catenatum]  
gene-MA16\_Dca014098 Retrovirus-related Pol polyprotein from transposon TNT 1-94 [Dendrobium catenatum]  
gene-MA16\_Dca020190 hypothetical protein MA16\_Dca020190 [Dendrobium catenatum]  
gene-MA16\_Dca018646 pentatricopeptide repeat-containing protein At5g15980, mitochondrial-like [Dendrobium catenatum]  
gene-MA16\_Dca022711 glutamate receptor 3.7-like [Dendrobium catenatum]  
gene-MA16\_Dca022915 Putative magnesium transporter MRS2-G [Dendrobium catenatum]  
gene-MA16\_Dca014007 Protein TORNADO 1 [Dendrobium catenatum]  
gene-MA16\_Dca011727 Cytochrome P450 71D10 [Dendrobium catenatum]  
gene-MA16\_Dca024716 aluminum-activated malate transporter 12-like [Dendrobium catenatum]  
gene-MA16\_Dca022465 hypothetical protein MA16\_Dca022465 [Dendrobium catenatum]  
gene-MA16\_Dca020080 hypothetical protein MA16\_Dca014216 [Dendrobium catenatum]  
gene-MA16\_Dca015877 hypothetical protein MA16\_Dca015877 [Dendrobium catenatum]  
gene-MA16\_Dca016418 transcription factor SRM1 [Dendrobium catenatum]  
gene-MA16\_Dca009144 squalene monooxygenase-like [Dendrobium catenatum]  
gene-MA16\_Dca017141 hypothetical protein MA16\_Dca017141 [Dendrobium catenatum]  
gene-MA16\_Dca020137 NDR1/HIN1-like protein 13 [Dendrobium catenatum]  
gene-MA16\_Dca008336 uncharacterized protein LOC110093430 [Dendrobium catenatum]  
gene-MA16\_Dca014115 hypothetical protein MA16\_Dca014115 [Dendrobium catenatum]  
gene-MA16\_Dca001590 cellulose synthase-like protein D2 [Dendrobium catenatum]  
gene-MA16\_Dca006086 hypothetical protein MA16\_Dca006086 [Dendrobium catenatum]  
gene-MA16\_Dca016983 Retrovirus-related Pol polyprotein from transposon TNT 1-94 [Dendrobium catenatum]  
gene-MA16\_Dca019502 uncharacterized protein At4g18257-like [Dendrobium catenatum]  
gene-MA16\_Dca028733 putative peptide/nitrate transporter [Dendrobium catenatum]  
gene-MA16\_Dca028823 hypothetical protein MA16\_Dca028823 [Dendrobium catenatum]  
gene-MA16\_Dca012579 small nuclear ribonucleoprotein Sm D1-like [Dendrobium catenatum]  
gene-MA16\_Dca025782 pentatricopeptide repeat-containing protein At4g16835, mitochondrial [Dendrobium catenatum]

|                     |                                                                                          |
|---------------------|------------------------------------------------------------------------------------------|
| gene-MA16_Dca007881 | probable protein arginine N-methyltransferase 3 [Dendrobium catenatum]                   |
| gene-MA16_Dca005778 | Chloride channel protein CLC-f [Dendrobium catenatum]                                    |
| gene-MA16_Dca011418 | Protein kinase APK1A, chloroplastic [Dendrobium catenatum]                               |
| gene-MA16_Dca015527 | uncharacterized protein LOC110096417 isoform X2 [Dendrobium catenatum]                   |
| gene-MA16_Dca002954 | zinc finger protein ZAT12-like [Dendrobium catenatum]                                    |
| gene-MA16_Dca015045 | fanconi-associated nuclease 1 homolog isoform X1 [Dendrobium catenatum]                  |
| gene-MA16_Dca001294 | Single-stranded DNA-binding protein WHY2, mitochondrial [Dendrobium catenatum]           |
| gene-MA16_Dca002633 | homeobox-leucine zipper protein HOX32-like [Dendrobium catenatum]                        |
| gene-MA16_Dca000832 | potassium transporter 7 isoform X1 [Dendrobium catenatum]                                |
| gene-MA16_Dca002787 | Serine/threonine-protein kinase PBS1 [Dendrobium catenatum]                              |
| gene-MA16_Dca008935 | ataxin-10 isoform X1 [Dendrobium catenatum]                                              |
| gene-MA16_Dca008326 | probable protein S-acyltransferase 7 isoform X1 [Dendrobium catenatum]                   |
| gene-MA16_Dca018766 | hypothetical protein MA16_Dca018766 [Dendrobium catenatum]                               |
| gene-MA16_Dca003398 | hypothetical protein MA16_Dca003398 [Dendrobium catenatum]                               |
| gene-MA16_Dca016163 | ferric reduction oxidase 2-like isoform X2 [Dendrobium catenatum]                        |
| gene-MA16_Dca004765 | Luminal-binding protein [Dendrobium catenatum]                                           |
| gene-MA16_Dca005170 | probable protein S-acyltransferase 1 [Dendrobium catenatum]                              |
| gene-MA16_Dca003489 | putative H/ACA ribonucleoprotein complex subunit 1-like protein 1 [Dendrobium catenatum] |
| gene-MA16_Dca013643 | putative glutamyl endopeptidase, chloroplastic [Dendrobium catenatum]                    |
| gene-MA16_Dca002996 | hypothetical protein MA16_Dca002996 [Dendrobium catenatum]                               |
| gene-MA16_Dca021058 | Cellulose synthase-like protein E2 [Dendrobium catenatum]                                |
| gene-MA16_Dca012296 | U-box domain-containing protein 10-like isoform X1 [Dendrobium catenatum]                |
| gene-MA16_Dca020944 | exopolygalacturonase isoform X1 [Dendrobium catenatum]                                   |
| gene-MA16_Dca020671 | hypothetical protein MA16_Dca020671 [Dendrobium catenatum]                               |
| gene-MA16_Dca009506 | hypothetical protein MA16_Dca009506 [Dendrobium catenatum]                               |
| gene-MA16_Dca000065 | Uncharacterized protein MA16_Dca000065 [Dendrobium catenatum]                            |
| gene-MA16_Dca011329 | hypothetical protein MA16_Dca011329 [Dendrobium catenatum]                               |
| gene-MA16_Dca006805 | hypothetical protein MA16_Dca006805 [Dendrobium catenatum]                               |
| gene-MA16_Dca023035 | hypothetical protein MA16_Dca023035 [Dendrobium catenatum]                               |
| gene-MA16_Dca006305 | squamosa promoter-binding-like protein 12 [Dendrobium catenatum]                         |



|                     |                                                                                         |
|---------------------|-----------------------------------------------------------------------------------------|
| gene-MA16_Dca001135 | putative serine/threonine-protein kinase-like protein CCR3 [Dendrobium catenatum]       |
| gene-MA16_Dca007943 | Diacylglycerol O-acyltransferase 2 [Dendrobium catenatum]                               |
| gene-MA16_Dca022385 | Protein RALF-like 33 [Dendrobium catenatum]                                             |
| gene-MA16_Dca003664 | probable 2-oxoglutarate-dependent dioxygenase AOP1 [Dendrobium catenatum]               |
| gene-MA16_Dca025505 | uncharacterized protein LOC110103003 [Dendrobium catenatum]                             |
| gene-MA16_Dca019094 | elongation factor G, mitochondrial-like [Dendrobium catenatum]                          |
| gene-MA16_Dca007249 | RNA-directed DNA polymerase [Dendrobium catenatum]                                      |
| gene-MA16_Dca018337 | uncharacterized protein LOC110105771 [Dendrobium catenatum]                             |
| gene-MA16_Dca004766 | hypothetical protein MA16_Dca004766 [Dendrobium catenatum]                              |
| gene-MA16_Dca017511 | hypothetical protein MA16_Dca017511 [Dendrobium catenatum]                              |
| gene-MA16_Dca024771 | hypothetical protein MA16_Dca024771 [Dendrobium catenatum]                              |
| gene-MA16_Dca013145 | primary amine oxidase 1-like [Dendrobium catenatum]                                     |
| gene-MA16_Dca014915 | hypothetical protein MA16_Dca014915 [Dendrobium catenatum]                              |
| gene-MA16_Dca004712 | AT-rich interactive domain-containing protein 1A-like isoform X1 [Dendrobium catenatum] |
| gene-MA16_Dca026781 | Retrovirus-related Pol polyprotein from transposon TNT 1-94 [Dendrobium catenatum]      |
| gene-MA16_Dca006168 | Retrovirus-related Pol polyprotein from transposon TNT 1-94 [Dendrobium catenatum]      |
| gene-MA16_Dca012265 | glutamate receptor 3.4-like [Dendrobium catenatum]                                      |
| gene-MA16_Dca006830 | hypothetical protein MA16_Dca006830 [Dendrobium catenatum]                              |
| gene-MA16_Dca016013 | abscisic acid 8'-hydroxylase 3-like [Dendrobium catenatum]                              |
| gene-MA16_Dca024728 | Folate transporter 1, chloroplastic [Dendrobium catenatum]                              |
| gene-MA16_Dca024831 | hypothetical protein MA16_Dca024831 [Dendrobium catenatum]                              |
| gene-MA16_Dca021885 | hypothetical protein MA16_Dca021885 [Dendrobium catenatum]                              |
| gene-MA16_Dca007838 | hypothetical protein MA16_Dca007838 [Dendrobium catenatum]                              |
| gene-MA16_Dca024385 | receptor protein kinase TMK1-like [Dendrobium catenatum]                                |
| gene-MA16_Dca013632 | hypothetical protein MA16_Dca013632 [Dendrobium catenatum]                              |
| gene-MA16_Dca002466 | hypothetical protein MA16_Dca002466 [Dendrobium catenatum]                              |
| gene-MA16_Dca013914 | Retrovirus-related Pol polyprotein from transposon TNT 1-94 [Dendrobium catenatum]      |
| gene-MA16_Dca000976 | hypothetical protein MA16_Dca000976 [Dendrobium catenatum]                              |
| gene-MA16_Dca006507 | heterogeneous nuclear ribonucleoprotein 1-like [Dendrobium catenatum]                   |
| gene-MA16_Dca000965 | long chain acyl-CoA synthetase 2 [Dendrobium catenatum]                                 |

|                     |                                                                                       |
|---------------------|---------------------------------------------------------------------------------------|
| gene-MA16_Dca028338 | putative fatty acyl-CoA reductase 4 [Dendrobium catenatum]                            |
| gene-MA16_Dca006821 | phytochrome A-like [Dendrobium catenatum]                                             |
| gene-MA16_Dca023637 | QWRF motif-containing protein 2-like [Dendrobium catenatum]                           |
| gene-MA16_Dca000773 | putative disease resistance protein RGA3 [Dendrobium catenatum]                       |
| gene-MA16_Dca013389 | Uncharacterized protein MA16_Dca013389 [Dendrobium catenatum]                         |
| gene-MA16_Dca011639 | U-box domain-containing protein 21-like [Dendrobium catenatum]                        |
| gene-MA16_Dca007213 | WAT1-related protein At5g45370-like isoform X1 [Dendrobium catenatum]                 |
| gene-MA16_Dca012781 | protein argonaute 7-like [Dendrobium catenatum]                                       |
| gene-MA16_Dca007439 | homeobox-leucine zipper protein HOX6-like [Dendrobium catenatum]                      |
| gene-MA16_Dca003930 | GATA transcription factor 26-like [Dendrobium catenatum]                              |
| gene-MA16_Dca006944 | AT-rich interactive domain-containing protein 2 [Dendrobium catenatum]                |
| gene-MA16_Dca014228 | QWRF motif-containing protein 2-like [Dendrobium catenatum]                           |
| gene-MA16_Dca003014 | Putative ribonuclease H protein [Dendrobium catenatum]                                |
| gene-MA16_Dca023002 | Zeaxanthin epoxidase, chloroplastic [Dendrobium catenatum]                            |
| gene-MA16_Dca025223 | putative pentatricopeptide repeat-containing protein At1g53330 [Dendrobium catenatum] |
| gene-MA16_Dca017400 | protein TRANSPORT INHIBITOR RESPONSE 1-like [Dendrobium catenatum]                    |
| gene-MA16_Dca011751 | hypothetical protein MA16_Dca011751 [Dendrobium catenatum]                            |
| gene-MA16_Dca021860 | Growth-regulating factor 6 [Dendrobium catenatum]                                     |
| gene-MA16_Dca021261 | hypothetical protein MA16_Dca021261 [Dendrobium catenatum]                            |
| gene-MA16_Dca022511 | GDP-L-galactose phosphorylase 1-like [Dendrobium catenatum]                           |
| gene-MA16_Dca025135 | heme-binding protein 2-like [Dendrobium catenatum]                                    |
| gene-MA16_Dca021268 | uncharacterized protein LOC110102257 isoform X1 [Dendrobium catenatum]                |
| gene-MA16_Dca016827 | Flap endonuclease 1-A [Dendrobium catenatum]                                          |
| gene-MA16_Dca007637 | ABC transporter I family member 6, chloroplastic [Dendrobium catenatum]               |
| gene-MA16_Dca011207 | ubiquitin-conjugating enzyme E2 4-like [Dendrobium catenatum]                         |
| gene-MA16_Dca010161 | hypothetical protein MA16_Dca010161 [Dendrobium catenatum]                            |
| gene-MA16_Dca001881 | hypothetical protein MA16_Dca001881 [Dendrobium catenatum]                            |
| gene-MA16_Dca008446 | hypothetical protein MA16_Dca008446 [Dendrobium catenatum]                            |
| gene-MA16_Dca022279 | neo-calmodulin-like [Dendrobium catenatum]                                            |
| gene-MA16_Dca019561 | uncharacterized protein LOC110110421 isoform X1 [Dendrobium catenatum]                |

|                     |                                                                                       |
|---------------------|---------------------------------------------------------------------------------------|
| gene-MA16_Dca021043 | probable serine/threonine protein kinase IRE [Dendrobium catenatum]                   |
| gene-MA16_Dca026853 | Photosystem II stability/assembly factor HCF136, chloroplastic [Dendrobium catenatum] |
| gene-MA16_Dca004167 | PAN domain-containing protein At5g03700 [Dendrobium catenatum]                        |
| gene-MA16_Dca005616 | transmembrane protein 184B isoform X1 [Dendrobium catenatum]                          |
| gene-MA16_Dca025817 | protein ROS1-like isoform X1 [Dendrobium catenatum]                                   |
| gene-MA16_Dca001948 | hypothetical protein MA16_Dca001948 [Dendrobium catenatum]                            |
| gene-MA16_Dca015498 | UPF0481 protein [Dendrobium catenatum]                                                |
| gene-MA16_Dca011860 | uncharacterized protein LOC110112786 [Dendrobium catenatum]                           |
| gene-MA16_Dca020888 | Alcohol dehydrogenase 3 [Dendrobium catenatum]                                        |
| gene-MA16_Dca015281 | Putative UDP-rhamnose:rhamnosyltransferase 1 [Dendrobium catenatum]                   |
| gene-MA16_Dca001581 | 4-coumarate--CoA ligase-like 6 [Dendrobium catenatum]                                 |
| gene-MA16_Dca021654 | hypothetical protein MA16_Dca021654 [Dendrobium catenatum]                            |
| gene-MA16_Dca001269 | 6-phosphofructokinase 1 [Dendrobium catenatum]                                        |
| gene-MA16_Dca023196 | protein SPIRRIG [Dendrobium catenatum]                                                |
| gene-MA16_Dca002952 | hypothetical protein MA16_Dca002952 [Dendrobium catenatum]                            |
| gene-MA16_Dca016409 | lysine-specific demethylase REF6 isoform X1 [Dendrobium catenatum]                    |
| gene-MA16_Dca002894 | beta-galactosidase 2-like isoform X1 [Dendrobium catenatum]                           |
| gene-MA16_Dca015394 | putative serine/threonine-protein kinase [Dendrobium catenatum]                       |
| gene-MA16_Dca013684 | Retrovirus-related Pol polyprotein from transposon TNT 1-94 [Dendrobium catenatum]    |
| gene-MA16_Dca004139 | Protein FAR1-RELATED SEQUENCE 5 [Dendrobium catenatum]                                |
| gene-MA16_Dca000144 | malignant T-cell-amplified sequence 1 homolog [Dendrobium catenatum]                  |
| gene-MA16_Dca010066 | hypothetical protein MA16_Dca010066 [Dendrobium catenatum]                            |
| gene-MA16_Dca003504 | hypothetical protein MA16_Dca003504 [Dendrobium catenatum]                            |
| gene-MA16_Dca002593 | cation/H(+) antiporter 15-like [Dendrobium catenatum]                                 |
| gene-MA16_Dca001128 | DNA (cytosine-5)-methyltransferase 1B-like [Dendrobium catenatum]                     |
| gene-MA16_Dca004204 | Retrovirus-related Pol polyprotein from transposon TNT 1-94 [Dendrobium catenatum]    |
| gene-MA16_Dca029169 | hypothetical protein MA16_Dca029169 [Dendrobium catenatum]                            |
| gene-MA16_Dca017451 | autophagy-related protein 18a [Dendrobium catenatum]                                  |
| gene-MA16_Dca009576 | hypothetical protein MA16_Dca009576 [Dendrobium catenatum]                            |
| gene-MA16_Dca019065 | U-box domain-containing protein 44-like [Dendrobium catenatum]                        |

|                     |                                                                                            |
|---------------------|--------------------------------------------------------------------------------------------|
| gene-MA16_Dca019795 | hypothetical protein MA16_Dca019795 [Dendrobium catenatum]                                 |
| gene-MA16_Dca018194 | probable 26S proteasome non-ATPase regulatory subunit 3 [Dendrobium catenatum]             |
| gene-MA16_Dca022957 | hypothetical protein MA16_Dca022957 [Dendrobium catenatum]                                 |
| gene-MA16_Dca027198 | G-type lectin S-receptor-like serine/threonine-protein kinase SD2-5 [Dendrobium catenatum] |
| gene-MA16_Dca012806 | Monogalactosyldiacylglycerol synthase, chloroplastic [Dendrobium catenatum]                |
| gene-MA16_Dca011824 | Homeobox-leucine zipper protein HOX32 [Dendrobium catenatum]                               |
| gene-MA16_Dca019600 | Aspartic proteinase nepenthesin-1 [Dendrobium catenatum]                                   |
| gene-MA16_Dca005943 | hypothetical protein MA16_Dca005943 [Dendrobium catenatum]                                 |
| gene-MA16_Dca003058 | sodium/hydrogen exchanger 2-like [Dendrobium catenatum]                                    |
| gene-MA16_Dca002439 | hypothetical protein MA16_Dca002439 [Dendrobium catenatum]                                 |
| gene-MA16_Dca004547 | hypothetical protein MA16_Dca004547 [Dendrobium catenatum]                                 |
| gene-MA16_Dca014409 | uncharacterized protein LOC110110813 [Dendrobium catenatum]                                |
| gene-MA16_Dca015648 | Leucine-rich repeat receptor-like serine/threonine-protein kinase [Dendrobium catenatum]   |
| gene-MA16_Dca003173 | RNA polymerase II C-terminal domain phosphatase-like 3 isoform X1 [Dendrobium catenatum]   |
| gene-MA16_Dca003551 | probable beta-D-xylosidase 7 [Dendrobium catenatum]                                        |
| gene-MA16_Dca021211 | non-specific lipid-transfer protein-like protein At2g13820 [Dendrobium catenatum]          |
| gene-MA16_Dca026931 | DNA repair protein UVH3 isoform X2 [Dendrobium catenatum]                                  |
| gene-MA16_Dca013243 | exosome complex exonuclease RRP44 homolog A-like [Dendrobium catenatum]                    |
| gene-MA16_Dca026199 | hypothetical protein MA16_Dca026199 [Dendrobium catenatum]                                 |
| gene-MA16_Dca023407 | hypothetical protein MA16_Dca023407 [Dendrobium catenatum]                                 |
| gene-MA16_Dca017679 | RING-H2 finger protein ATL70 [Dendrobium catenatum]                                        |
| gene-MA16_Dca003197 | hypothetical protein MA16_Dca003197 [Dendrobium catenatum]                                 |
| gene-MA16_Dca013233 | protein N-lysine methyltransferase METTL21A isoform X2 [Dendrobium catenatum]              |
| gene-MA16_Dca015397 | GDSL esterase/lipase [Dendrobium catenatum]                                                |
| gene-MA16_Dca011747 | hypothetical protein MA16_Dca011747 [Dendrobium catenatum]                                 |
| gene-MA16_Dca010679 | Scarecrow-like protein 6 [Dendrobium catenatum]                                            |
| gene-MA16_Dca014230 | uncharacterized protein LOC110096149 isoform X2 [Dendrobium catenatum]                     |
| gene-MA16_Dca005107 | BEACH domain-containing protein C2-like isoform X1 [Dendrobium catenatum]                  |
| gene-MA16_Dca014245 | putative LRR receptor-like serine/threonine-protein kinase [Dendrobium catenatum]          |
| gene-MA16_Dca015359 | origin of replication complex subunit 2 [Dendrobium catenatum]                             |

|                     |                                                                               |
|---------------------|-------------------------------------------------------------------------------|
| gene-MA16_Dca023376 | NEDD8-conjugating enzyme Ubc12-like [Dendrobium catenatum]                    |
| gene-MA16_Dca003010 | probable galacturonosyltransferase 11 [Dendrobium catenatum]                  |
| gene-MA16_Dca010724 | hypothetical protein MA16_Dca010724 [Dendrobium catenatum]                    |
| gene-MA16_Dca007376 | sugar transporter ERD6-like 6 [Dendrobium catenatum]                          |
| gene-MA16_Dca024348 | MADS-box transcription factor 22-like [Dendrobium catenatum]                  |
| gene-MA16_Dca004721 | hypothetical protein MA16_Dca004721 [Dendrobium catenatum]                    |
| gene-MA16_Dca020870 | uncharacterized protein LOC110095700 [Dendrobium catenatum]                   |
| gene-MA16_Dca013127 | hypothetical protein MA16_Dca013127 [Dendrobium catenatum]                    |
| gene-MA16_Dca016611 | synaptotagmin-2 [Dendrobium catenatum]                                        |
| gene-MA16_Dca007799 | xyloglucan galactosyltransferase KATAMARI1 homolog [Dendrobium catenatum]     |
| gene-MA16_Dca009549 | 40S ribosomal protein S5-1 [Dendrobium catenatum]                             |
| gene-MA16_Dca008195 | pectinesterase QRT1-like [Dendrobium catenatum]                               |
| gene-MA16_Dca008944 | putative mitochondrial protein [Dendrobium catenatum]                         |
| gene-MA16_Dca010685 | uncharacterized protein LOC110110571 [Dendrobium catenatum]                   |
| gene-MA16_Dca022643 | cysteine-rich receptor-like protein kinase 2 [Dendrobium catenatum]           |
| gene-MA16_Dca023418 | NADPH-dependent pterin aldehyde reductase [Dendrobium catenatum]              |
| gene-MA16_Dca014865 | hypothetical protein MA16_Dca014865 [Dendrobium catenatum]                    |
| gene-MA16_Dca004920 | uncharacterized protein At4g29660 [Dendrobium catenatum]                      |
| gene-MA16_Dca009701 | Leucine-rich repeat receptor-like protein kinase PEPR1 [Dendrobium catenatum] |
| gene-MA16_Dca024901 | Putative disease resistance protein RGA4 [Dendrobium catenatum]               |
| gene-MA16_Dca003261 | Pentatricopeptide repeat-containing protein [Dendrobium catenatum]            |
| gene-MA16_Dca003721 | Putative ribonuclease H protein [Dendrobium catenatum]                        |
| gene-MA16_Dca020488 | hypothetical protein MA16_Dca020488 [Dendrobium catenatum]                    |
| gene-MA16_Dca007957 | Protein ROOT HAIR DEFECTIVE 3 [Dendrobium catenatum]                          |
| gene-MA16_Dca022520 | Kinesin-like protein KIN12B [Dendrobium catenatum]                            |
| gene-MA16_Dca006221 | hypothetical protein MA16_Dca006221 [Dendrobium catenatum]                    |
| gene-MA16_Dca007756 | hypothetical protein MA16_Dca007756 [Dendrobium catenatum]                    |
| gene-MA16_Dca025344 | '-3'; exoribonuclease 2 [Dendrobium catenatum]                                |
| gene-MA16_Dca026005 | Putative ribonuclease H protein [Dendrobium catenatum]                        |
| gene-MA16_Dca007050 | BEL1-like homeodomain protein 1 [Dendrobium catenatum]                        |

gene-MA16\_Dca015741 hydroquinone glucosyltransferase-like [Dendrobium catenatum]  
 gene-MA16\_Dca002781 hypothetical protein MA16\_Dca002781 [Dendrobium catenatum]  
 gene-MA16\_Dca021252 hypothetical protein MA16\_Dca021252 [Dendrobium catenatum]  
 gene-MA16\_Dca019763 pentatricopeptide repeat-containing protein At1g09220, mitochondrial [Dendrobium catenatum]  
 gene-MA16\_Dca001340 polygalacturonase inhibitor 2-like [Dendrobium catenatum]  
 gene-MA16\_Dca028435 hypothetical protein MA16\_Dca028435 [Dendrobium catenatum]  
 gene-MA16\_Dca022325 probable LRR receptor-like serine/threonine-protein kinase IRK [Dendrobium catenatum]  
 gene-MA16\_Dca024381 uncharacterized protein At5g49945 [Dendrobium catenatum]  
 gene-MA16\_Dca003059 tubby-like F-box protein 6 [Dendrobium catenatum]  
 gene-MA16\_Dca019839 Ras-related protein Rab7 [Dendrobium catenatum]  
 gene-MA16\_Dca010639 elicitor-responsive protein 1 isoform X2 [Dendrobium catenatum]  
 gene-MA16\_Dca003017 snurportin-1 isoform X1 [Dendrobium catenatum]  
 gene-MA16\_Dca010674 Putative glucuronosyltransferase PGSIP7 [Dendrobium catenatum]  
 gene-MA16\_Dca016599 GDSL esterase/lipase EXL3 [Dendrobium catenatum]  
 gene-MA16\_Dca028164 hypothetical protein MA16\_Dca028164 [Dendrobium catenatum]  
 gene-MA16\_Dca004160 6-phosphofructokinase 3 [Dendrobium catenatum]  
 gene-MA16\_Dca020264 putative mitochondrial protein [Dendrobium catenatum]  
 gene-MA16\_Dca028562 Leucine-rich repeat receptor-like serine/threonine-protein kinase BAM2 [Dendrobium catenatum]  
 gene-MA16\_Dca015708 hypothetical protein MA16\_Dca015708 [Dendrobium catenatum]  
 gene-MA16\_Dca002744 NAC domain-containing protein 92-like [Dendrobium catenatum]  
 gene-MA16\_Dca024228 UPF0678 fatty acid-binding protein-like protein At1g79260 [Dendrobium catenatum]  
 gene-MA16\_Dca022487 uncharacterized protein LOC110102400 isoform X1 [Dendrobium catenatum]  
 gene-MA16\_Dca018513 putative mannan synthase 4 [Dendrobium catenatum]  
 gene-MA16\_Dca021241 myosin-6-like [Dendrobium catenatum]  
 gene-MA16\_Dca006854 putative folate-biopterin transporter 2 [Dendrobium catenatum]  
 gene-MA16\_Dca023833 protoporphyrinogen oxidase, mitochondrial isoform X2 [Dendrobium catenatum]  
 gene-MA16\_Dca024982 hypothetical protein MA16\_Dca024982 [Dendrobium catenatum]  
 gene-MA16\_Dca004038 Protein argonaute 1A [Dendrobium catenatum]  
 gene-MA16\_Dca002756 DNA (cytosine-5)-methyltransferase DRM2 [Dendrobium catenatum]  
 gene-MA16\_Dca022384 calcium-transporting ATPase, endoplasmic reticulum-type [Dendrobium catenatum]

|                     |                                                                                        |
|---------------------|----------------------------------------------------------------------------------------|
| gene-MA16_Dca024106 | hypothetical protein MA16_Dca024106 [Dendrobium catenatum]                             |
| gene-MA16_Dca000471 | hypothetical protein MA16_Dca000471 [Dendrobium catenatum]                             |
| gene-MA16_Dca010160 | uncharacterized protein LOC110111729 isoform X1 [Dendrobium catenatum]                 |
| gene-MA16_Dca028410 | probable cellulose synthase A catalytic subunit 8 [UDP-forming] [Dendrobium catenatum] |
| gene-MA16_Dca024961 | U-box domain-containing protein 10 [Dendrobium catenatum]                              |
| gene-MA16_Dca002697 | DNA helicase INO80 [Dendrobium catenatum]                                              |
| gene-MA16_Dca019184 | BURP domain-containing protein 3 [Dendrobium catenatum]                                |
| gene-MA16_Dca008765 | zinc finger CCCH domain-containing protein 59 isoform X3 [Dendrobium catenatum]        |
| gene-MA16_Dca001131 | hypothetical protein MA16_Dca001131 [Dendrobium catenatum]                             |
| gene-MA16_Dca010994 | GATA transcription factor 26 [Dendrobium catenatum]                                    |
| gene-MA16_Dca001427 | Retrovirus-related Pol polyprotein from transposon TNT 1-94 [Dendrobium catenatum]     |
| gene-MA16_Dca009044 | DNA-directed RNA polymerase II subunit RPB1 [Dendrobium catenatum]                     |
| gene-MA16_Dca010021 | hypothetical protein MA16_Dca010021 [Dendrobium catenatum]                             |
| gene-MA16_Dca015416 | protein terminal ear1-like [Dendrobium catenatum]                                      |
| gene-MA16_Dca015799 | subtilisin-like protease SBT1.5 [Dendrobium catenatum]                                 |
| gene-MA16_Dca012038 | Transcription factor GAMYB [Dendrobium catenatum]                                      |
| gene-MA16_Dca014296 | clathrin light chain 1-like [Dendrobium catenatum]                                     |
| gene-MA16_Dca025545 | transcription factor bHLH35 [Dendrobium catenatum]                                     |
| gene-MA16_Dca000545 | replication protein A 70 kDa DNA-binding subunit A-like [Dendrobium catenatum]         |
| gene-MA16_Dca024703 | Mitochondrial carrier protein MTM1 [Dendrobium catenatum]                              |
| gene-MA16_Dca021298 | Protein Mut11 [Dendrobium catenatum]                                                   |
| gene-MA16_Dca014772 | Amino acid permease 3 [Dendrobium catenatum]                                           |
| gene-MA16_Dca014216 | hypothetical protein MA16_Dca014216 [Dendrobium catenatum]                             |
| gene-MA16_Dca001176 | hypothetical protein MA16_Dca001176 [Dendrobium catenatum]                             |
| gene-MA16_Dca017444 | hypothetical protein MA16_Dca017444 [Dendrobium catenatum]                             |
| gene-MA16_Dca023601 | tricalbin-3-like [Dendrobium catenatum]                                                |
| gene-MA16_Dca023667 | protein DEHYDRATION-INDUCED 19 homolog 2-like isoform X1 [Dendrobium catenatum]        |
| gene-MA16_Dca012576 | enhancer of mRNA-decapping protein 4-like isoform X1 [Dendrobium catenatum]            |
| gene-MA16_Dca000190 | uncharacterized protein LOC110092184 [Dendrobium catenatum]                            |
| gene-MA16_Dca002998 | putative disease resistance protein RGA4 [Dendrobium catenatum]                        |

|                     |                                                                                               |
|---------------------|-----------------------------------------------------------------------------------------------|
| gene-MA16_Dca027486 | Retrovirus-related Pol polyprotein from transposon TNT 1-94 [Dendrobium catenatum]            |
| gene-MA16_Dca007839 | Putative F-box protein [Dendrobium catenatum]                                                 |
| gene-MA16_Dca006324 | putative mitochondrial protein [Dendrobium catenatum]                                         |
| gene-MA16_Dca026879 | receptor-like protein kinase HSL1 [Dendrobium catenatum]                                      |
| gene-MA16_Dca003500 | protein UPSTREAM OF FLC-like [Dendrobium catenatum]                                           |
| gene-MA16_Dca014673 | Flavonoid 3'-monooxygenase [Dendrobium catenatum]                                             |
| gene-MA16_Dca011466 | uncharacterized protein LOC110098751 [Dendrobium catenatum]                                   |
| gene-MA16_Dca021850 | leucine-rich repeat receptor-like serine/threonine-protein kinase BAM1 [Dendrobium catenatum] |
| gene-MA16_Dca027822 | hypothetical protein MA16_Dca027822 [Dendrobium catenatum]                                    |
| gene-MA16_Dca009127 | putative polyamine oxidase 5 [Dendrobium catenatum]                                           |
| gene-MA16_Dca000998 | Nitrilase 2 [Dendrobium catenatum]                                                            |
| gene-MA16_Dca020793 | kinesin-like protein KIN-13A [Dendrobium catenatum]                                           |
| gene-MA16_Dca008171 | Scarecrow-like protein 6 [Dendrobium catenatum]                                               |
| gene-MA16_Dca001045 | hypothetical protein MA16_Dca001045 [Dendrobium catenatum]                                    |
| gene-MA16_Dca012323 | bibenzyl synthase [Dendrobium catenatum]                                                      |
| gene-MA16_Dca020431 | Uncharacterized protein MA16_Dca020431 [Dendrobium catenatum]                                 |
| gene-MA16_Dca004955 | NAC domain-containing protein 100 [Dendrobium catenatum]                                      |
| gene-MA16_Dca023642 | hypothetical protein MA16_Dca023642 [Dendrobium catenatum]                                    |
| gene-MA16_Dca018132 | Heparanase-like protein 2 [Dendrobium catenatum]                                              |
| gene-MA16_Dca022280 | 65-kDa microtubule-associated protein 6 [Dendrobium catenatum]                                |
| gene-MA16_Dca015850 | squamosa promoter-binding-like protein 18 isoform X1 [Dendrobium catenatum]                   |
| gene-MA16_Dca026323 | auxin response factor 17-like [Dendrobium catenatum]                                          |
| gene-MA16_Dca000152 | protein NPG1-like [Dendrobium catenatum]                                                      |
| gene-MA16_Dca022503 | photosystem I reaction center subunit N, chloroplastic [Dendrobium catenatum]                 |
| gene-MA16_Dca002047 | hypothetical protein MA16_Dca002047 [Dendrobium catenatum]                                    |
| gene-MA16_Dca019792 | Retrovirus-related Pol polyprotein from transposon TNT 1-94 [Dendrobium catenatum]            |
| gene-MA16_Dca004447 | aspartic proteinase-like isoform X1 [Dendrobium catenatum]                                    |
| gene-MA16_Dca010456 | hypothetical protein MA16_Dca010456 [Dendrobium catenatum]                                    |
| gene-MA16_Dca016363 | protein ROOT PRIMORDIUM DEFECTIVE 1 [Dendrobium catenatum]                                    |
| gene-MA16_Dca015477 | hypothetical protein MA16_Dca015477 [Dendrobium catenatum]                                    |



|                     |                                                                                       |
|---------------------|---------------------------------------------------------------------------------------|
| gene-MA16_Dca004892 | RHOMBOID-like protein 10, chloroplastic isoform X1 [Dendrobium catenatum]             |
| gene-MA16_Dca003884 | Retrovirus-related Pol polyprotein from transposon TNT 1-94 [Dendrobium catenatum]    |
| gene-MA16_Dca025768 | putative LRR receptor-like serine/threonine-protein kinase [Dendrobium catenatum]     |
| gene-MA16_Dca003444 | Calcium/calmodulin-dependent serine/threonine-protein kinase 1 [Dendrobium catenatum] |
| gene-MA16_Dca023929 | uncharacterized protein LOC110104744 [Dendrobium catenatum]                           |
| gene-MA16_Dca003757 | putative mitochondrial protein ymf40 [Dendrobium catenatum]                           |
| gene-MA16_Dca006786 | DNA topoisomerase 2 [Dendrobium catenatum]                                            |
| gene-MA16_Dca021952 | uncharacterized protein LOC110116054 [Dendrobium catenatum]                           |
| gene-MA16_Dca005273 | ABC transporter B family member 29, chloroplastic [Dendrobium catenatum]              |
| gene-MA16_Dca010058 | Calcium sensing receptor, chloroplastic [Dendrobium catenatum]                        |
| gene-MA16_Dca014470 | Pumilio like 1 [Dendrobium catenatum]                                                 |
| gene-MA16_Dca006054 | uncharacterized protein LOC110093273 [Dendrobium catenatum]                           |
| gene-MA16_Dca011492 | MATE efflux family protein 2, chloroplastic [Dendrobium catenatum]                    |
| gene-MA16_Dca017308 | hypothetical protein MA16_Dca017308 [Dendrobium catenatum]                            |
| gene-MA16_Dca025215 | CDPK-related kinase 7-like [Dendrobium catenatum]                                     |
| gene-MA16_Dca024101 | hypothetical protein MA16_Dca024101 [Dendrobium catenatum]                            |
| gene-MA16_Dca012699 | Putative white-brown complex like protein 30 [Dendrobium catenatum]                   |
| gene-MA16_Dca020884 | protein LAZ1 homolog 1-like [Dendrobium catenatum]                                    |
| gene-MA16_Dca021351 | all-trans-nonaprenyl-diphosphate synthase [Dendrobium catenatum]                      |
| gene-MA16_Dca010909 | uncharacterized protein LOC110116322 [Dendrobium catenatum]                           |
| gene-MA16_Dca023636 | uncharacterized protein LOC110099350 [Dendrobium catenatum]                           |
| gene-MA16_Dca011489 | protein trichome birefringence-like 34 [Dendrobium catenatum]                         |
| gene-MA16_Dca015756 | putative mitochondrial protein [Dendrobium catenatum]                                 |
| gene-MA16_Dca025956 | Putative ribonuclease H protein [Dendrobium catenatum]                                |
| gene-MA16_Dca000047 | hypothetical protein MA16_Dca000047 [Dendrobium catenatum]                            |
| gene-MA16_Dca021282 | hypothetical protein MA16_Dca021282 [Dendrobium catenatum]                            |
| gene-MA16_Dca004836 | F-box/LRR-repeat protein 14 isoform X1 [Dendrobium catenatum]                         |
| gene-MA16_Dca019643 | probable transcription factor KAN2 isoform X1 [Dendrobium catenatum]                  |
| gene-MA16_Dca005888 | Decapping nuclease Dom3z like, chloroplastic [Dendrobium catenatum]                   |
| gene-MA16_Dca013626 | hypothetical protein MA16_Dca013626 [Dendrobium catenatum]                            |

|                     |                                                                                               |
|---------------------|-----------------------------------------------------------------------------------------------|
| gene-MA16_Dca016920 | probable inorganic phosphate transporter 1-10 [Dendrobium catenatum]                          |
| gene-MA16_Dca020657 | pentatricopeptide repeat-containing protein At5g16860-like [Dendrobium catenatum]             |
| gene-MA16_Dca008661 | uncharacterized protein LOC110107461 [Dendrobium catenatum]                                   |
| gene-MA16_Dca015927 | mitoferrin [Dendrobium catenatum]                                                             |
| gene-MA16_Dca027794 | hypothetical protein MA16_Dca027794 [Dendrobium catenatum]                                    |
| gene-MA16_Dca012654 | pentatricopeptide repeat-containing protein At4g02750-like [Dendrobium catenatum]             |
| gene-MA16_Dca016601 | F-box protein At4g35930 isoform X2 [Dendrobium catenatum]                                     |
| gene-MA16_Dca015064 | hypothetical protein MA16_Dca015064 [Dendrobium catenatum]                                    |
| gene-MA16_Dca001239 | Zinc finger CCCH domain-containing protein 18 [Dendrobium catenatum]                          |
| gene-MA16_Dca015517 | target of Myb protein 1-like isoform X1 [Dendrobium catenatum]                                |
| gene-MA16_Dca005175 | Acyl carrier protein 2, mitochondrial [Dendrobium catenatum]                                  |
| gene-MA16_Dca010894 | Protein ROOT HAIR DEFECTIVE 3 like 2 [Dendrobium catenatum]                                   |
| gene-MA16_Dca012631 | cytochrome P450 71D7-like [Dendrobium catenatum]                                              |
| gene-MA16_Dca019690 | Retrovirus-related Pol polyprotein from transposon TNT 1-94 [Dendrobium catenatum]            |
| gene-MA16_Dca017713 | hypothetical protein MA16_Dca017713 [Dendrobium catenatum]                                    |
| gene-MA16_Dca007080 | hypothetical protein MA16_Dca007080 [Dendrobium catenatum]                                    |
| gene-MA16_Dca023773 | WAT1-related protein At1g43650-like isoform X1 [Dendrobium catenatum]                         |
| gene-MA16_Dca022482 | BTB/POZ domain-containing protein [Dendrobium catenatum]                                      |
| gene-MA16_Dca000284 | Disease resistance protein RPP13 [Dendrobium catenatum]                                       |
| gene-MA16_Dca007191 | Cellulose synthase-like protein D2 [Dendrobium catenatum]                                     |
| gene-MA16_Dca010799 | leucine-rich repeat receptor-like serine/threonine-protein kinase BAM1 [Dendrobium catenatum] |
| gene-MA16_Dca002039 | Floral homeotic protein APETALA 2 [Dendrobium catenatum]                                      |
| gene-MA16_Dca006501 | Pentatricopeptide repeat-containing protein [Dendrobium catenatum]                            |
| gene-MA16_Dca022268 | nuclear pore complex protein NUP155 [Dendrobium catenatum]                                    |
| gene-MA16_Dca001649 | putative mitochondrial protein [Dendrobium catenatum]                                         |
| gene-MA16_Dca008070 | 3-isopropylmalate dehydratase large subunit, chloroplastic [Dendrobium catenatum]             |
| gene-MA16_Dca019636 | Phosphoinositide phosphatase SAC4 [Dendrobium catenatum]                                      |
| gene-MA16_Dca014820 | Ribulose biphosphate carboxylase large chain [Dendrobium catenatum]                           |
| gene-MA16_Dca028548 | putative mitochondrial protein [Dendrobium catenatum]                                         |
| gene-MA16_Dca002308 | eukaryotic translation initiation factor 3 subunit K [Dendrobium catenatum]                   |

|                     |                                                                                                         |
|---------------------|---------------------------------------------------------------------------------------------------------|
| gene-MA16_Dca017130 | putative transcriptional regulator RABBIT EARS [Dendrobium catenatum]                                   |
| gene-MA16_Dca021994 | hypothetical protein MA16_Dca021994 [Dendrobium catenatum]                                              |
| gene-MA16_Dca000617 | probable alpha,alpha-trehalose-phosphate synthase [UDP-forming] 7 [Dendrobium catenatum]                |
| gene-MA16_Dca004804 | protein TSS [Dendrobium catenatum]                                                                      |
| gene-MA16_Dca005626 | receptor-like protein kinase 2 [Dendrobium catenatum]                                                   |
| gene-MA16_Dca004316 | L-ascorbate oxidase-like isoform X1 [Dendrobium catenatum]                                              |
| gene-MA16_Dca023110 | DNA-directed RNA polymerase subunit beta&apos;&apos; [Dendrobium catenatum]                             |
| gene-MA16_Dca015975 | Sulfate transporter 4.1, chloroplastic [Dendrobium catenatum]                                           |
| gene-MA16_Dca026411 | hypothetical protein MA16_Dca026411 [Dendrobium catenatum]                                              |
| gene-MA16_Dca027610 | Geraniol 8-hydroxylase [Dendrobium catenatum]                                                           |
| gene-MA16_Dca022168 | hypothetical protein MA16_Dca022168 [Dendrobium catenatum]                                              |
| gene-MA16_Dca025429 | hypothetical protein MA16_Dca025429 [Dendrobium catenatum]                                              |
| gene-MA16_Dca012849 | scarecrow-like protein 9 [Dendrobium catenatum]                                                         |
| gene-MA16_Dca021863 | hypothetical protein MA16_Dca021863 [Dendrobium catenatum]                                              |
| gene-MA16_Dca010588 | putative ADP-ribosylation factor GTPase-activating protein AGD13 [Dendrobium catenatum]                 |
| gene-MA16_Dca023822 | protein CLT1, chloroplastic-like [Dendrobium catenatum]                                                 |
| gene-MA16_Dca016598 | GDSL esterase/lipase EXL3-like [Dendrobium catenatum]                                                   |
| gene-MA16_Dca000776 | putative disease resistance protein RGA3 [Dendrobium catenatum]                                         |
| gene-MA16_Dca020424 | uncharacterized protein LOC110092974 [Dendrobium catenatum]                                             |
| gene-MA16_Dca000537 | E3 ubiquitin-protein ligase RDUF2-like [Dendrobium catenatum]                                           |
| gene-MA16_Dca002837 | TPR repeat-containing thioredoxin TTL2 [Dendrobium catenatum]                                           |
| gene-MA16_Dca005051 | WUSCHEL-related homeobox 8-like [Dendrobium catenatum]                                                  |
| gene-MA16_Dca001354 | Cytoplasmic tRNA 2-thiolation protein 1 [Dendrobium catenatum]                                          |
| gene-MA16_Dca000847 | hypothetical protein MA16_Dca000847 [Dendrobium catenatum]                                              |
| gene-MA16_Dca018986 | ATP-dependent DNA helicase Q-like 5 [Dendrobium catenatum]                                              |
| gene-MA16_Dca020483 | LRR receptor-like serine/threonine-protein kinase GSO2 [Dendrobium catenatum]                           |
| gene-MA16_Dca020924 | Fatty acyl-CoA reductase 2 [Dendrobium catenatum]                                                       |
| gene-MA16_Dca015948 | carboxy-terminal domain RNA polymerase II polypeptide A small phosphatase 1-like [Dendrobium catenatum] |
| gene-MA16_Dca003911 | hypothetical protein MA16_Dca003911 [Dendrobium catenatum]                                              |
| gene-MA16_Dca017446 | ABC transporter C family member 8-like [Dendrobium catenatum]                                           |

|                     |                                                                                        |
|---------------------|----------------------------------------------------------------------------------------|
| gene-MA16_Dca006890 | ADP-ribosylation factor 1-like [Dendrobium catenatum]                                  |
| gene-MA16_Dca005151 | mannose-specific lectin-like [Dendrobium catenatum]                                    |
| gene-MA16_Dca004841 | putative monogalactosyldiacylglycerol synthase 3, chloroplastic [Dendrobium catenatum] |
| gene-MA16_Dca027789 | Retrovirus-related Pol polyprotein from transposon TNT 1-94 [Dendrobium catenatum]     |
| gene-MA16_Dca021366 | hypothetical protein MA16_Dca021366 [Dendrobium catenatum]                             |
| gene-MA16_Dca006233 | hypothetical protein MA16_Dca006233 [Dendrobium catenatum]                             |
| gene-MA16_Dca022933 | hypothetical protein MA16_Dca022933 [Dendrobium catenatum]                             |
| gene-MA16_Dca002010 | peroxidase P7-like [Dendrobium catenatum]                                              |
| gene-MA16_Dca009302 | hypothetical protein MA16_Dca009302 [Dendrobium catenatum]                             |
| gene-MA16_Dca023978 | phosphatidylinositol-3-phosphatase myotubularin-1 isoform X1 [Dendrobium catenatum]    |
| gene-MA16_Dca022292 | protein VAC14 homolog [Dendrobium catenatum]                                           |
| gene-MA16_Dca012490 | putative mitochondrial protein [Dendrobium catenatum]                                  |
| gene-MA16_Dca002332 | hypothetical protein MA16_Dca002332 [Dendrobium catenatum]                             |
| gene-MA16_Dca013961 | uncharacterized protein LOC110104445 [Dendrobium catenatum]                            |
| gene-MA16_Dca005053 | putative disease resistance protein RGA3 [Dendrobium catenatum]                        |
| gene-MA16_Dca021416 | uncharacterized protein LOC110096454 [Dendrobium catenatum]                            |
| gene-MA16_Dca004762 | hypothetical protein MA16_Dca004762 [Dendrobium catenatum]                             |
| gene-MA16_Dca024809 | general transcription factor IIH subunit 2 [Dendrobium catenatum]                      |
| gene-MA16_Dca008206 | glutathione transferase GST 23-like [Dendrobium catenatum]                             |
| gene-MA16_Dca001930 | Homeobox-leucine zipper protein HOX19 [Dendrobium catenatum]                           |
| gene-MA16_Dca023943 | hypothetical protein MA16_Dca023943 [Dendrobium catenatum]                             |
| gene-MA16_Dca012611 | protein phosphatase methylesterase 1 [Dendrobium catenatum]                            |
| gene-MA16_Dca024876 | hypothetical protein MA16_Dca024876 [Dendrobium catenatum]                             |
| gene-MA16_Dca004736 | Pentatricopeptide repeat-containing protein [Dendrobium catenatum]                     |
| gene-MA16_Dca026841 | hypothetical protein MA16_Dca026841 [Dendrobium catenatum]                             |
| gene-MA16_Dca013047 | peroxiredoxin-2E-1, chloroplastic [Dendrobium catenatum]                               |
| gene-MA16_Dca010252 | histone-lysine N-methyltransferase ATX4-like isoform X1 [Dendrobium catenatum]         |
| gene-MA16_Dca018995 | Shaggy-related protein kinase theta [Dendrobium catenatum]                             |
| gene-MA16_Dca003147 | 6-phosphofructokinase 5, chloroplastic [Dendrobium catenatum]                          |
| gene-MA16_Dca019153 | serine/arginine-rich splicing factor SC35 [Dendrobium catenatum]                       |

|                     |                                                                                      |
|---------------------|--------------------------------------------------------------------------------------|
| gene-MA16_Dca000468 | solute carrier family 35 member F1-like isoform X1 [Dendrobium catenatum]            |
| gene-MA16_Dca001538 | hypothetical protein MA16_Dca001538 [Dendrobium catenatum]                           |
| gene-MA16_Dca004600 | Vesicle-associated membrane protein 721 [Dendrobium catenatum]                       |
| gene-MA16_Dca005341 | Putative E3 ubiquitin-protein ligase XBAT31 [Dendrobium catenatum]                   |
| gene-MA16_Dca028352 | Cellulose synthase A catalytic subunit 9 [UDP-forming] [Dendrobium catenatum]        |
| gene-MA16_Dca010535 | hypothetical protein MA16_Dca010535 [Dendrobium catenatum]                           |
| gene-MA16_Dca019932 | uncharacterized protein LOC110107297 isoform X2 [Dendrobium catenatum]               |
| gene-MA16_Dca026571 | wall-associated receptor kinase-like 20 [Dendrobium catenatum]                       |
| gene-MA16_Dca004158 | Phosphatidylinositol 4-phosphate 5-kinase 1 [Dendrobium catenatum]                   |
| gene-MA16_Dca019870 | hypothetical protein MA16_Dca019870 [Dendrobium catenatum]                           |
| gene-MA16_Dca019346 | uncharacterized protein LOC110110873 [Dendrobium catenatum]                          |
| gene-MA16_Dca000090 | squamosa promoter-binding-like protein 7 [Dendrobium catenatum]                      |
| gene-MA16_Dca026234 | hypothetical protein MA16_Dca026234 [Dendrobium catenatum]                           |
| gene-MA16_Dca027103 | hypothetical protein MA16_Dca027103 [Dendrobium catenatum]                           |
| gene-MA16_Dca011850 | Protein IQ-DOMAIN 32 [Dendrobium catenatum]                                          |
| gene-MA16_Dca007582 | hypothetical protein MA16_Dca007582 [Dendrobium catenatum]                           |
| gene-MA16_Dca005584 | hypothetical protein MA16_Dca005584 [Dendrobium catenatum]                           |
| gene-MA16_Dca016440 | putative protein phosphatase 2C 57 [Dendrobium catenatum]                            |
| gene-MA16_Dca004128 | uncharacterized protein LOC110112561 isoform X4 [Dendrobium catenatum]               |
| gene-MA16_Dca003381 | protein BOBBER 1 [Dendrobium catenatum]                                              |
| gene-MA16_Dca002142 | hypothetical protein MA16_Dca002142 [Dendrobium catenatum]                           |
| gene-MA16_Dca026959 | Organic cation/carnitine transporter 2 [Dendrobium catenatum]                        |
| gene-MA16_Dca013818 | probable proline transporter 2 [Dendrobium catenatum]                                |
| gene-MA16_Dca026995 | 18.6 kDa class III heat shock protein [Dendrobium catenatum]                         |
| gene-MA16_Dca022452 | G-type lectin S-receptor-like serine/threonine-protein kinase [Dendrobium catenatum] |
| gene-MA16_Dca001472 | floral homeotic protein AGAMOUS-like [Dendrobium catenatum]                          |
| gene-MA16_Dca026808 | PTI1-like tyrosine-protein kinase 2 [Dendrobium catenatum]                           |
| gene-MA16_Dca018400 | Protein IQ-DOMAIN 1 [Dendrobium catenatum]                                           |
| gene-MA16_Dca010930 | hypothetical protein MA16_Dca010930 [Dendrobium catenatum]                           |
| gene-MA16_Dca010007 | Xaa-Pro dipeptidase [Dendrobium catenatum]                                           |

|                     |                                                                                                |
|---------------------|------------------------------------------------------------------------------------------------|
| gene-MA16_Dca003307 | putative pentatricopeptide repeat-containing protein At5g59900 [Dendrobium catenatum]          |
| gene-MA16_Dca011089 | probable galacturonosyltransferase 7 [Dendrobium catenatum]                                    |
| gene-MA16_Dca025353 | threonine dehydratase [Dendrobium catenatum]                                                   |
| gene-MA16_Dca022914 | putative fructose-bisphosphate aldolase 3, chloroplastic [Dendrobium catenatum]                |
| gene-MA16_Dca000999 | protein SMAX1-LIKE 2-like [Dendrobium catenatum]                                               |
| gene-MA16_Dca001189 | hypothetical protein MA16_Dca001189 [Dendrobium catenatum]                                     |
| gene-MA16_Dca021175 | putative pentatricopeptide repeat-containing protein At1g74580 [Dendrobium catenatum]          |
| gene-MA16_Dca019151 | uncharacterized protein LOC110092254 isoform X1 [Dendrobium catenatum]                         |
| gene-MA16_Dca004772 | probable LRR receptor-like serine/threonine-protein kinase At1g06840 [Dendrobium catenatum]    |
| gene-MA16_Dca018663 | lysine-specific demethylase JMJ25-like [Dendrobium catenatum]                                  |
| gene-MA16_Dca017411 | protein IQ-DOMAIN 1-like isoform X1 [Dendrobium catenatum]                                     |
| gene-MA16_Dca003194 | transport inhibitor response 1-like protein Os05g0150500 [Dendrobium catenatum]                |
| gene-MA16_Dca006595 | receptor-like protein 12 isoform X1 [Dendrobium catenatum]                                     |
| gene-MA16_Dca015811 | Pentatricopeptide repeat-containing protein [Dendrobium catenatum]                             |
| gene-MA16_Dca001922 | hypothetical protein MA16_Dca001922 [Dendrobium catenatum]                                     |
| gene-MA16_Dca000347 | glycerol-3-phosphate acyltransferase 1-like [Dendrobium catenatum]                             |
| gene-MA16_Dca016112 | ATP-dependent DNA helicase 2 subunit KU80 [Dendrobium catenatum]                               |
| gene-MA16_Dca018211 | hypothetical protein MA16_Dca018211 [Dendrobium catenatum]                                     |
| gene-MA16_Dca013055 | Primary amine oxidase [Dendrobium catenatum]                                                   |
| gene-MA16_Dca017541 | prolyl-tRNA synthetase [Dendrobium catenatum]                                                  |
| gene-MA16_Dca011873 | auxin response factor 12-like isoform X1 [Dendrobium catenatum]                                |
| gene-MA16_Dca022235 | 2-C-methyl-D-erythritol 4-phosphate cytidylyltransferase, chloroplastic [Dendrobium catenatum] |
| gene-MA16_Dca001550 | probable methyltransferase PMT13 [Dendrobium catenatum]                                        |
| gene-MA16_Dca014631 | DNA repair protein RAD51 homolog 3 isoform X1 [Dendrobium catenatum]                           |
| gene-MA16_Dca002391 | hypothetical protein MA16_Dca002391 [Dendrobium catenatum]                                     |
| gene-MA16_Dca006616 | protein CHROMATIN REMODELING 5 [Dendrobium catenatum]                                          |
| gene-MA16_Dca024998 | psbP domain-containing protein 4, chloroplastic [Dendrobium catenatum]                         |
| gene-MA16_Dca024322 | BTB/POZ domain-containing protein [Dendrobium catenatum]                                       |
| gene-MA16_Dca004156 | hypothetical protein MA16_Dca004156 [Dendrobium catenatum]                                     |
| gene-MA16_Dca010653 | E3 ubiquitin-protein ligase RDUF2-like [Dendrobium catenatum]                                  |

|                     |                                                                                         |
|---------------------|-----------------------------------------------------------------------------------------|
| gene-MA16_Dca027263 | hypothetical protein MA16_Dca027263 [Dendrobium catenatum]                              |
| gene-MA16_Dca009400 | uncharacterized protein LOC110104256 [Dendrobium catenatum]                             |
| gene-MA16_Dca022905 | pentatricopeptide repeat-containing protein At5g15280 isoform X1 [Dendrobium catenatum] |
| gene-MA16_Dca021047 | extradiol ring-cleavage dioxygenase-like [Dendrobium catenatum]                         |
| gene-MA16_Dca008557 | uncharacterized protein LOC110097094 [Dendrobium catenatum]                             |
| gene-MA16_Dca015083 | Putative ribonuclease H protein [Dendrobium catenatum]                                  |
| gene-MA16_Dca017912 | uncharacterized protein DDB_G0283697 [Dendrobium catenatum]                             |
| gene-MA16_Dca013338 | CCR4-NOT transcription complex subunit 4 [Dendrobium catenatum]                         |
| gene-MA16_Dca004325 | hypothetical protein MA16_Dca004325 [Dendrobium catenatum]                              |
| gene-MA16_Dca020077 | mavicyanin-like [Dendrobium catenatum]                                                  |
| gene-MA16_Dca001828 | uncharacterized protein LOC110114606 [Dendrobium catenatum]                             |
| gene-MA16_Dca008822 | Serine/threonine-protein kinase Nek6 [Dendrobium catenatum]                             |
| gene-MA16_Dca007698 | hypothetical protein MA16_Dca007698 [Dendrobium catenatum]                              |
| gene-MA16_Dca018219 | hypothetical protein MA16_Dca018219 [Dendrobium catenatum]                              |
| gene-MA16_Dca014033 | uncharacterized protein LOC110112570 [Dendrobium catenatum]                             |
| gene-MA16_Dca023970 | hypothetical protein MA16_Dca023970 [Dendrobium catenatum]                              |
| gene-MA16_Dca022211 | putative mitochondrial protein [Dendrobium catenatum]                                   |
| gene-MA16_Dca004003 | Retrovirus-related Pol polyprotein from transposon TNT 1-94 [Dendrobium catenatum]      |
| gene-MA16_Dca021498 | Cell division cycle protein 48 like [Dendrobium catenatum]                              |
| gene-MA16_Dca008238 | ricin B-like lectin R40G3 [Dendrobium catenatum]                                        |
| gene-MA16_Dca006742 | putative alpha-mannosidase I MNS4 [Dendrobium catenatum]                                |
| gene-MA16_Dca005024 | Gibberellin 2-beta-dioxygenase 2 [Dendrobium catenatum]                                 |
| gene-MA16_Dca018017 | 1-acyl-sn-glycerol-3-phosphate acyltransferase 1, chloroplastic [Dendrobium catenatum]  |
| gene-MA16_Dca012816 | Retrovirus-related Pol polyprotein from transposon TNT 1-94 [Dendrobium catenatum]      |
| gene-MA16_Dca006362 | hypothetical protein MA16_Dca006362 [Dendrobium catenatum]                              |
| gene-MA16_Dca025530 | ras-related protein RABE1c-like [Dendrobium catenatum]                                  |
| gene-MA16_Dca027631 | hypothetical protein MA16_Dca027631 [Dendrobium catenatum]                              |
| gene-MA16_Dca023928 | hypothetical protein MA16_Dca023928 [Dendrobium catenatum]                              |
| gene-MA16_Dca010687 | GDSL esterase/lipase [Dendrobium catenatum]                                             |
| gene-MA16_Dca028211 | 125 kDa kinesin-related protein [Dendrobium catenatum]                                  |

|                     |                                                                                                        |
|---------------------|--------------------------------------------------------------------------------------------------------|
| gene-MA16_Dca019753 | hypothetical protein MA16_Dca019753 [Dendrobium catenatum]                                             |
| gene-MA16_Dca014704 | Putative ribonuclease H protein [Dendrobium catenatum]                                                 |
| gene-MA16_Dca003210 | peptide methionine sulfoxide reductase B5-like [Dendrobium catenatum]                                  |
| gene-MA16_Dca003122 | endoribonuclease Dicer homolog 4 isoform X2 [Dendrobium catenatum]                                     |
| gene-MA16_Dca017043 | hypothetical protein MA16_Dca017043 [Dendrobium catenatum]                                             |
| gene-MA16_Dca018414 | histone-lysine N-methyltransferase, H3 lysine-9 specific SUVH5-like [Dendrobium catenatum]             |
| gene-MA16_Dca007798 | AP3-complex subunit beta-A [Dendrobium catenatum]                                                      |
| gene-MA16_Dca011403 | hypothetical protein MA16_Dca011403 [Dendrobium catenatum]                                             |
| gene-MA16_Dca012397 | protein ENHANCED DISEASE RESISTANCE 2-like [Dendrobium catenatum]                                      |
| gene-MA16_Dca015180 | Uncharacterized protein MA16_Dca015180 [Dendrobium catenatum]                                          |
| gene-MA16_Dca014974 | uncharacterized protein LOC110096268 isoform X1 [Dendrobium catenatum]                                 |
| gene-MA16_Dca011997 | Uncharacterized protein MA16_Dca011997 [Dendrobium catenatum]                                          |
| gene-MA16_Dca005635 | hypothetical protein MA16_Dca005635 [Dendrobium catenatum]                                             |
| gene-MA16_Dca000891 | heparan-alpha-glucosaminide N-acetyltransferase [Dendrobium catenatum]                                 |
| gene-MA16_Dca005118 | DEAD-box ATP-dependent RNA helicase 48 [Dendrobium catenatum]                                          |
| gene-MA16_Dca003169 | U3 small nucleolar ribonucleoprotein protein IMP4 [Dendrobium catenatum]                               |
| gene-MA16_Dca006776 | UTP:RNA uridylyltransferase 1 isoform X2 [Dendrobium catenatum]                                        |
| gene-MA16_Dca027594 | putative mitochondrial protein [Dendrobium catenatum]                                                  |
| gene-MA16_Dca006091 | Filament-like plant protein 1 [Dendrobium catenatum]                                                   |
| gene-MA16_Dca004606 | hypothetical protein MA16_Dca004606 [Dendrobium catenatum]                                             |
| gene-MA16_Dca020750 | probable LRR receptor-like serine/threonine-protein kinase At4g20940 isoform X1 [Dendrobium catenatum] |
| gene-MA16_Dca019905 | probable RNA methyltransferase At5g51130 [Dendrobium catenatum]                                        |
| gene-MA16_Dca028464 | Retrovirus-related Pol polyprotein from transposon TNT 1-94 [Dendrobium catenatum]                     |
| gene-MA16_Dca021165 | Pentatricopeptide repeat-containing protein [Dendrobium catenatum]                                     |
| gene-MA16_Dca014349 | hypothetical protein MA16_Dca014349 [Dendrobium catenatum]                                             |
| gene-MA16_Dca019273 | katanin p80 WD40 repeat-containing subunit B1 homolog [Dendrobium catenatum]                           |
| gene-MA16_Dca023840 | heat shock protein 81-1 [Dendrobium catenatum]                                                         |
| gene-MA16_Dca003056 | hypothetical protein MA16_Dca003056 [Dendrobium catenatum]                                             |
| gene-MA16_Dca015790 | Uncharacterized protein MA16_Dca015790 [Dendrobium catenatum]                                          |
| gene-MA16_Dca001078 | zinc finger AN1 and C2H2 domain-containing stress-associated protein 16-like [Dendrobium catenatum]    |



|                     |                                                                                                      |
|---------------------|------------------------------------------------------------------------------------------------------|
| gene-MA16_Dca021436 | hypothetical protein MA16_Dca021436 [Dendrobium catenatum]                                           |
| gene-MA16_Dca009679 | hypothetical protein MA16_Dca009679 [Dendrobium catenatum]                                           |
| gene-MA16_Dca019278 | Alpha-galactosidase [Dendrobium catenatum]                                                           |
| gene-MA16_Dca005938 | hypothetical protein MA16_Dca005938 [Dendrobium catenatum]                                           |
| gene-MA16_Dca010730 | hypothetical protein MA16_Dca010730 [Dendrobium catenatum]                                           |
| gene-MA16_Dca009281 | hypothetical protein MA16_Dca009281 [Dendrobium catenatum]                                           |
| gene-MA16_Dca022573 | Cytokinin dehydrogenase 2 [Dendrobium catenatum]                                                     |
| gene-MA16_Dca007128 | putative pentatricopeptide repeat-containing protein At5g13230, mitochondrial [Dendrobium catenatum] |
| gene-MA16_Dca016572 | protein LOW PSII ACCUMULATION 3, chloroplastic isoform X1 [Dendrobium catenatum]                     |
| gene-MA16_Dca021283 | TPR repeat-containing thioredoxin TTL1 [Dendrobium catenatum]                                        |
| gene-MA16_Dca020878 | hypothetical protein MA16_Dca020878 [Dendrobium catenatum]                                           |
| gene-MA16_Dca019385 | serine/threonine-protein kinase D6PK-like [Dendrobium catenatum]                                     |
| gene-MA16_Dca004182 | hypothetical protein MA16_Dca004182 [Dendrobium catenatum]                                           |
| gene-MA16_Dca015271 | Ultraviolet-B receptor UVR8 [Dendrobium catenatum]                                                   |
| gene-MA16_Dca020111 | scarecrow-like protein 6 [Dendrobium catenatum]                                                      |
| gene-MA16_Dca002586 | Retrovirus-related Pol polyprotein from transposon TNT 1-94 [Dendrobium catenatum]                   |
| gene-MA16_Dca018734 | hypothetical protein MA16_Dca018734 [Dendrobium catenatum]                                           |
| gene-MA16_Dca028729 | hypothetical protein MA16_Dca028729 [Dendrobium catenatum]                                           |
| gene-MA16_Dca002207 | Protein ASPARTIC PROTEASE IN GUARD CELL 2 [Dendrobium catenatum]                                     |
| gene-MA16_Dca000753 | putative mitochondrial protein [Dendrobium catenatum]                                                |
| gene-MA16_Dca011281 | Serine/threonine-protein kinase CTR1 [Dendrobium catenatum]                                          |
| gene-MA16_Dca016286 | Putative phospholipid-transporting ATPase 4 [Dendrobium catenatum]                                   |
| gene-MA16_Dca017669 | Retrovirus-related Pol polyprotein from transposon TNT 1-94 [Dendrobium catenatum]                   |
| gene-MA16_Dca020524 | hypothetical protein MA16_Dca020524 [Dendrobium catenatum]                                           |
| gene-MA16_Dca025663 | putative LRR receptor-like serine/threonine-protein kinase [Dendrobium catenatum]                    |
| gene-MA16_Dca017777 | hypothetical protein MA16_Dca017777 [Dendrobium catenatum]                                           |
| gene-MA16_Dca007005 | hypothetical protein MA16_Dca007005 [Dendrobium catenatum]                                           |
| gene-MA16_Dca005473 | Protochlorophyllide-dependent translocon component 52, chloroplastic [Dendrobium catenatum]          |
| gene-MA16_Dca017215 | hypothetical protein MA16_Dca017215 [Dendrobium catenatum]                                           |
| gene-MA16_Dca027254 | hypothetical protein MA16_Dca027254 [Dendrobium catenatum]                                           |

|                     |                                                                                            |
|---------------------|--------------------------------------------------------------------------------------------|
| gene-MA16_Dca006898 | uncharacterized protein LOC110111686 isoform X2 [Dendrobium catenatum]                     |
| gene-MA16_Dca020517 | Secologanin synthase [Dendrobium catenatum]                                                |
| gene-MA16_Dca025840 | Polyadenylate-binding protein 2 [Dendrobium catenatum]                                     |
| gene-MA16_Dca015518 | hypothetical protein MA16_Dca015518 [Dendrobium catenatum]                                 |
| gene-MA16_Dca008229 | Retrovirus-related Pol polyprotein from transposon TNT 1-94 [Dendrobium catenatum]         |
| gene-MA16_Dca023216 | hypothetical protein MA16_Dca023216 [Dendrobium catenatum]                                 |
| gene-MA16_Dca024036 | 29 kDa ribonucleoprotein A, chloroplastic [Dendrobium catenatum]                           |
| gene-MA16_Dca007864 | thioredoxin F, chloroplastic-like [Dendrobium catenatum]                                   |
| gene-MA16_Dca006773 | uncharacterized protein LOC110107686 [Dendrobium catenatum]                                |
| gene-MA16_Dca012978 | hypothetical protein MA16_Dca012978 [Dendrobium catenatum]                                 |
| gene-MA16_Dca019891 | Disease resistance protein RGA2 [Dendrobium catenatum]                                     |
| gene-MA16_Dca015101 | uncharacterized protein LOC110104281 [Dendrobium catenatum]                                |
| gene-MA16_Dca020738 | F-box protein SKIP19-like [Dendrobium catenatum]                                           |
| gene-MA16_Dca020349 | Retrovirus-related Pol polyprotein from transposon TNT 1-94 [Dendrobium catenatum]         |
| gene-MA16_Dca018035 | Putative ribonuclease H protein [Dendrobium catenatum]                                     |
| gene-MA16_Dca027199 | G-type lectin S-receptor-like serine/threonine-protein kinase SD2-5 [Dendrobium catenatum] |
| gene-MA16_Dca002588 | NAC domain-containing protein 68-like [Dendrobium catenatum]                               |
| gene-MA16_Dca019572 | transcription factor TCP24-like [Dendrobium catenatum]                                     |
| gene-MA16_Dca016699 | SEC12-like protein 2 [Dendrobium catenatum]                                                |
| gene-MA16_Dca002133 | DEAD-box ATP-dependent RNA helicase 24 [Dendrobium catenatum]                              |
| gene-MA16_Dca014117 | probable E3 ubiquitin-protein ligase RHB1A [Dendrobium catenatum]                          |
| gene-MA16_Dca001951 | Xyloglucan galactosyltransferase KATAMARI1 like [Dendrobium catenatum]                     |
| gene-MA16_Dca024988 | fatty-acid-binding protein 2 [Dendrobium catenatum]                                        |
| gene-MA16_Dca017598 | Zinc finger CCCH domain-containing protein 65 [Dendrobium catenatum]                       |
| gene-MA16_Dca011590 | protein ODORANT1-like [Dendrobium catenatum]                                               |
| gene-MA16_Dca006002 | eukaryotic translation initiation factor 5A-2 [Dendrobium catenatum]                       |
| gene-MA16_Dca004236 | protein CUP-SHAPED COTYLEDON 2-like [Dendrobium catenatum]                                 |
| gene-MA16_Dca001411 | cytochrome P450 71A1-like [Dendrobium catenatum]                                           |
| gene-MA16_Dca003148 | myb-related protein 306-like [Dendrobium catenatum]                                        |
| gene-MA16_Dca026276 | hypothetical protein MA16_Dca026276 [Dendrobium catenatum]                                 |

|                     |                                                                                       |
|---------------------|---------------------------------------------------------------------------------------|
| gene-MA16_Dca023073 | hypothetical protein MA16_Dca023073 [Dendrobium catenatum]                            |
| gene-MA16_Dca014997 | probable galacturonosyltransferase 7 isoform X2 [Dendrobium catenatum]                |
| gene-MA16_Dca021807 | hypothetical protein MA16_Dca021807 [Dendrobium catenatum]                            |
| gene-MA16_Dca008635 | Aspartic proteinase Asp1 [Dendrobium catenatum]                                       |
| gene-MA16_Dca015933 | multiple inositol polyphosphate phosphatase 1 [Dendrobium catenatum]                  |
| gene-MA16_Dca016402 | inorganic phosphate transporter 1-4-like [Dendrobium catenatum]                       |
| gene-MA16_Dca016634 | Dol-P-Man:Man(5)GlcNAc(2)-PP-Dol alpha-1,3-mannosyltransferase [Dendrobium catenatum] |
| gene-MA16_Dca003076 | CTP synthase [Dendrobium catenatum]                                                   |
| gene-MA16_Dca010931 | myb family transcription factor EFM-like isoform X1 [Dendrobium catenatum]            |
| gene-MA16_Dca012268 | hypothetical protein MA16_Dca012268 [Dendrobium catenatum]                            |
| gene-MA16_Dca013261 | uncharacterized protein LOC110112590 [Dendrobium catenatum]                           |
| gene-MA16_Dca022150 | uncharacterized protein LOC110109896 [Dendrobium catenatum]                           |
| gene-MA16_Dca001069 | hypothetical protein MA16_Dca001069 [Dendrobium catenatum]                            |
| gene-MA16_Dca010625 | uncharacterized protein LOC110108420 [Dendrobium catenatum]                           |
| gene-MA16_Dca002337 | E3 ubiquitin ligase BIG BROTHER [Dendrobium catenatum]                                |
| gene-MA16_Dca008457 | Formin-like protein 11 [Dendrobium catenatum]                                         |
| gene-MA16_Dca006665 | hypothetical protein MA16_Dca006665 [Dendrobium catenatum]                            |
| gene-MA16_Dca002844 | tubulin beta-2 chain [Dendrobium catenatum]                                           |
| gene-MA16_Dca023657 | hypothetical protein MA16_Dca023657 [Dendrobium catenatum]                            |
| gene-MA16_Dca007473 | hypothetical protein MA16_Dca007473 [Dendrobium catenatum]                            |
| gene-MA16_Dca007732 | hypothetical protein MA16_Dca007732 [Dendrobium catenatum]                            |
| gene-MA16_Dca022518 | hypothetical protein MA16_Dca022518 [Dendrobium catenatum]                            |
| gene-MA16_Dca002693 | thylakoid lumenal 16.5 kDa protein, chloroplastic [Dendrobium catenatum]              |
| gene-MA16_Dca002968 | hypothetical protein MA16_Dca002968 [Dendrobium catenatum]                            |
| gene-MA16_Dca020866 | hypothetical protein MA16_Dca020866 [Dendrobium catenatum]                            |
| gene-MA16_Dca022176 | hypothetical protein MA16_Dca022176 [Dendrobium catenatum]                            |
| gene-MA16_Dca008624 | polygalacturonase inhibitor 2-like [Dendrobium catenatum]                             |
| gene-MA16_Dca000565 | hypothetical protein MA16_Dca000565 [Dendrobium catenatum]                            |
| gene-MA16_Dca016687 | hypothetical protein MA16_Dca016687 [Dendrobium catenatum]                            |
| gene-MA16_Dca004215 | hypothetical protein MA16_Dca004215 [Dendrobium catenatum]                            |

|                     |                                                                                               |
|---------------------|-----------------------------------------------------------------------------------------------|
| gene-MA16_Dca021565 | uncharacterized protein LOC110092103 isoform X1 [Dendrobium catenatum]                        |
| gene-MA16_Dca021949 | Mitogen-activated protein kinase kinase kinase ANP1 [Dendrobium catenatum]                    |
| gene-MA16_Dca021544 | hypothetical protein MA16_Dca021544 [Dendrobium catenatum]                                    |
| gene-MA16_Dca027105 | pentatricopeptide repeat-containing protein At5g16860-like [Dendrobium catenatum]             |
| gene-MA16_Dca021979 | cleavage stimulation factor subunit 50 isoform X4 [Dendrobium catenatum]                      |
| gene-MA16_Dca016948 | uncharacterized protein LOC110097744 isoform X1 [Dendrobium catenatum]                        |
| gene-MA16_Dca014981 | Beta-D-xylosidase 4 [Dendrobium catenatum]                                                    |
| gene-MA16_Dca019880 | Retrovirus-related Pol polyprotein from transposon TNT 1-94 [Dendrobium catenatum]            |
| gene-MA16_Dca013976 | UDP-glucuronic acid decarboxylase 5 [Dendrobium catenatum]                                    |
| gene-MA16_Dca023276 | eukaryotic peptide chain release factor GTP-binding subunit ERF3A-like [Dendrobium catenatum] |
| gene-MA16_Dca018725 | growth-regulating factor 4-like isoform X2 [Dendrobium catenatum]                             |
| gene-MA16_Dca023223 | protein LURP-one-related 6 [Dendrobium catenatum]                                             |
| gene-MA16_Dca024154 | uncharacterized protein LOC110107561 isoform X2 [Dendrobium catenatum]                        |
| gene-MA16_Dca021529 | tRNA pseudouridine38/39 synthase [Dendrobium catenatum]                                       |
| gene-MA16_Dca001413 | probable potassium transporter 11 isoform X2 [Dendrobium catenatum]                           |
| gene-MA16_Dca017373 | hypothetical protein MA16_Dca017373 [Dendrobium catenatum]                                    |
| gene-MA16_Dca018457 | hypothetical protein MA16_Dca018457 [Dendrobium catenatum]                                    |
| gene-MA16_Dca023835 | IN2-2 protein [Dendrobium catenatum]                                                          |
| gene-MA16_Dca014912 | Protein GLUTAMINE DUMPER 4 [Dendrobium catenatum]                                             |
| gene-MA16_Dca026585 | hypothetical protein MA16_Dca026585 [Dendrobium catenatum]                                    |
| gene-MA16_Dca023855 | Glucose-6-phosphate 1-dehydrogenase 2, chloroplastic [Dendrobium catenatum]                   |
| gene-MA16_Dca003117 | hypothetical protein MA16_Dca003117 [Dendrobium catenatum]                                    |
| gene-MA16_Dca007512 | probable protein S-acyltransferase 12 [Dendrobium catenatum]                                  |
| gene-MA16_Dca021249 | putative mitochondrial protein [Dendrobium catenatum]                                         |
| gene-MA16_Dca010818 | hypothetical protein MA16_Dca010818 [Dendrobium catenatum]                                    |
| gene-MA16_Dca006046 | uncharacterized protein LOC110093300 isoform X1 [Dendrobium catenatum]                        |
| gene-MA16_Dca025558 | putative mitochondrial protein [Dendrobium catenatum]                                         |
| gene-MA16_Dca024400 | exosome complex exonuclease RRP44 homolog A [Dendrobium catenatum]                            |
| gene-MA16_Dca025093 | pentatricopeptide repeat-containing protein At2g15980 [Dendrobium catenatum]                  |
| gene-MA16_Dca003193 | UPF0613 protein PB24D3.06c isoform X1 [Dendrobium catenatum]                                  |

|                     |                                                                                             |
|---------------------|---------------------------------------------------------------------------------------------|
| gene-MA16_Dca012776 | homoserine kinase-like [Dendrobium catenatum]                                               |
| gene-MA16_Dca024208 | probable histidine kinase 2 isoform X1 [Dendrobium catenatum]                               |
| gene-MA16_Dca018497 | protein HUA2-LIKE 3-like isoform X3 [Dendrobium catenatum]                                  |
| gene-MA16_Dca016118 | MAP3K epsilon protein kinase 1-like [Dendrobium catenatum]                                  |
| gene-MA16_Dca021751 | hypothetical protein MA16_Dca021751 [Dendrobium catenatum]                                  |
| gene-MA16_Dca022572 | hypothetical protein MA16_Dca022572 [Dendrobium catenatum]                                  |
| gene-MA16_Dca026307 | Cyclin-C1-1 [Dendrobium catenatum]                                                          |
| gene-MA16_Dca023243 | hypothetical protein MA16_Dca023243 [Dendrobium catenatum]                                  |
| gene-MA16_Dca007060 | transcription factor VIP1 [Dendrobium catenatum]                                            |
| gene-MA16_Dca007034 | Retrovirus-related Pol polyprotein from transposon TNT 1-94 [Dendrobium catenatum]          |
| gene-MA16_Dca026208 | uncharacterized protein LOC110093226 [Dendrobium catenatum]                                 |
| gene-MA16_Dca010441 | hypothetical protein MA16_Dca010441 [Dendrobium catenatum]                                  |
| gene-MA16_Dca007090 | potassium transporter 7-like [Dendrobium catenatum]                                         |
| gene-MA16_Dca019790 | KH domain-containing protein [Dendrobium catenatum]                                         |
| gene-MA16_Dca013902 | MACPF domain-containing protein [Dendrobium catenatum]                                      |
| gene-MA16_Dca022392 | Retrovirus-related Pol polyprotein from transposon TNT 1-94 [Dendrobium catenatum]          |
| gene-MA16_Dca009375 | hypothetical protein MA16_Dca009375 [Dendrobium catenatum]                                  |
| gene-MA16_Dca022838 | S-linalool synthase [Dendrobium catenatum]                                                  |
| gene-MA16_Dca007879 | putative mannitol dehydrogenase [Dendrobium catenatum]                                      |
| gene-MA16_Dca008921 | CHD3-type chromatin-remodeling factor PICKLE isoform X3 [Dendrobium catenatum]              |
| gene-MA16_Dca024641 | hypothetical protein MA16_Dca024641 [Dendrobium catenatum]                                  |
| gene-MA16_Dca023665 | hypothetical protein MA16_Dca023665 [Dendrobium catenatum]                                  |
| gene-MA16_Dca026991 | octanoyltransferase [Dendrobium catenatum]                                                  |
| gene-MA16_Dca009289 | hypothetical protein MA16_Dca009289 [Dendrobium catenatum]                                  |
| gene-MA16_Dca007307 | pentatricopeptide repeat-containing protein At4g26680, mitochondrial [Dendrobium catenatum] |
| gene-MA16_Dca021203 | hypothetical protein MA16_Dca021203 [Dendrobium catenatum]                                  |
| gene-MA16_Dca019966 | Putative ribonuclease H protein [Dendrobium catenatum]                                      |
| gene-MA16_Dca012449 | tRNA A64-2'-O-ribosylphosphate transferase isoform X1 [Dendrobium catenatum]                |
| gene-MA16_Dca024776 | Retrovirus-related Pol polyprotein from transposon TNT 1-94 [Dendrobium catenatum]          |
| gene-MA16_Dca023326 | protein LIKE COV 2-like isoform X1 [Dendrobium catenatum]                                   |

|                     |                                                                                    |
|---------------------|------------------------------------------------------------------------------------|
| gene-MA16_Dca016176 | Putative disease resistance protein RGA4 [Dendrobium catenatum]                    |
| gene-MA16_Dca009947 | CDK5RAP3-like protein [Dendrobium catenatum]                                       |
| gene-MA16_Dca020016 | Endochitinase B [Dendrobium catenatum]                                             |
| gene-MA16_Dca025929 | protein STRICTOSIDINE SYNTHASE-LIKE 13 [Dendrobium catenatum]                      |
| gene-MA16_Dca018676 | hypothetical protein MA16_Dca018676 [Dendrobium catenatum]                         |
| gene-MA16_Dca023402 | protein trichome birefringence-like 5 [Dendrobium catenatum]                       |
| gene-MA16_Dca011027 | Pentatricopeptide repeat-containing protein [Dendrobium catenatum]                 |
| gene-MA16_Dca011387 | Amino acid permease 2 [Dendrobium catenatum]                                       |
| gene-MA16_Dca021290 | hypothetical protein MA16_Dca021290 [Dendrobium catenatum]                         |
| gene-MA16_Dca009335 | Transcription factor TCP2 [Dendrobium catenatum]                                   |
| gene-MA16_Dca002527 | Retrovirus-related Pol polyprotein from transposon TNT 1-94 [Dendrobium catenatum] |
| gene-MA16_Dca018160 | RNA-directed DNA polymerase [Dendrobium catenatum]                                 |
| gene-MA16_Dca007248 | scarecrow-like protein 27 [Dendrobium catenatum]                                   |
| gene-MA16_Dca003426 | RING-H2 finger protein ATL8 [Dendrobium catenatum]                                 |
| gene-MA16_Dca028670 | hypothetical protein MA16_Dca028670 [Dendrobium catenatum]                         |
| gene-MA16_Dca013437 | DNA-directed RNA polymerase subunit beta [Dendrobium catenatum]                    |
| gene-MA16_Dca023878 | B2 protein [Dendrobium catenatum]                                                  |
| gene-MA16_Dca005952 | hypothetical protein MA16_Dca005952 [Dendrobium catenatum]                         |
| gene-MA16_Dca015430 | Premnaspirodiene oxygenase [Dendrobium catenatum]                                  |
| gene-MA16_Dca018844 | lysine-specific demethylase 5A [Dendrobium catenatum]                              |
| gene-MA16_Dca020968 | hydroxyproline O-galactosyltransferase HPGT1 isoform X2 [Dendrobium catenatum]     |
| gene-MA16_Dca003634 | hypothetical protein MA16_Dca003634 [Dendrobium catenatum]                         |
| gene-MA16_Dca014710 | Retrovirus-related Pol polyprotein from transposon TNT 1-94 [Dendrobium catenatum] |
| gene-MA16_Dca017923 | probable pectin methyltransferase QUA2 [Dendrobium catenatum]                      |
| gene-MA16_Dca004199 | CBL-interacting serine/threonine-protein kinase 11 [Dendrobium catenatum]          |
| gene-MA16_Dca003733 | 125 kDa kinesin-related protein [Dendrobium catenatum]                             |
| gene-MA16_Dca003689 | Transcription factor bHLH82 [Dendrobium catenatum]                                 |
| gene-MA16_Dca017805 | protein CHROMATIN REMODELING 24 [Dendrobium catenatum]                             |
| gene-MA16_Dca024023 | purple acid phosphatase 15 [Dendrobium catenatum]                                  |
| gene-MA16_Dca015575 | hypothetical protein MA16_Dca015575 [Dendrobium catenatum]                         |

|                     |                                                                                            |
|---------------------|--------------------------------------------------------------------------------------------|
| gene-MA16_Dca016262 | Retrovirus-related Pol polyprotein from transposon TNT 1-94 [Dendrobium catenatum]         |
| gene-MA16_Dca028500 | hypothetical protein MA16_Dca028500 [Dendrobium catenatum]                                 |
| gene-MA16_Dca001725 | UPF0503 protein At3g09070, chloroplastic-like [Dendrobium catenatum]                       |
| gene-MA16_Dca026681 | leucyl-tRNA synthetase [Dendrobium catenatum]                                              |
| gene-MA16_Dca020890 | hypothetical protein MA16_Dca020890 [Dendrobium catenatum]                                 |
| gene-MA16_Dca004307 | Gamma-glutamyltranspeptidase 1 [Dendrobium catenatum]                                      |
| gene-MA16_Dca013450 | Disease resistance protein RGA2 [Dendrobium catenatum]                                     |
| gene-MA16_Dca010469 | hypothetical protein MA16_Dca010469 [Dendrobium catenatum]                                 |
| gene-MA16_Dca028394 | Peroxidase 50 [Dendrobium catenatum]                                                       |
| gene-MA16_Dca013832 | Pentatricopeptide repeat-containing protein [Dendrobium catenatum]                         |
| gene-MA16_Dca019865 | hypothetical protein MA16_Dca019865 [Dendrobium catenatum]                                 |
| gene-MA16_Dca017076 | putative mitochondrial protein [Dendrobium catenatum]                                      |
| gene-MA16_Dca002226 | uncharacterized protein LOC110111878 isoform X1 [Dendrobium catenatum]                     |
| gene-MA16_Dca008063 | hypothetical protein MA16_Dca008063 [Dendrobium catenatum]                                 |
| gene-MA16_Dca003670 | probable sodium-coupled neutral amino acid transporter 6 [Dendrobium catenatum]            |
| gene-MA16_Dca022913 | Trihelix transcription factor GT-3a [Dendrobium catenatum]                                 |
| gene-MA16_Dca020114 | uncharacterized protein LOC110096332 [Dendrobium catenatum]                                |
| gene-MA16_Dca024206 | Protein CYPRO4 [Dendrobium catenatum]                                                      |
| gene-MA16_Dca015175 | Shikimate O-hydroxycinnamoyltransferase [Dendrobium catenatum]                             |
| gene-MA16_Dca027327 | pentatricopeptide repeat-containing protein At5g66520-like [Dendrobium catenatum]          |
| gene-MA16_Dca004540 | G-type lectin S-receptor-like serine/threonine-protein kinase SD2-5 [Dendrobium catenatum] |
| gene-MA16_Dca002895 | uncharacterized protein LOC110116761 isoform X2 [Dendrobium catenatum]                     |
| gene-MA16_Dca013497 | Pentatricopeptide repeat-containing protein [Dendrobium catenatum]                         |
| gene-MA16_Dca015918 | uncharacterized protein LOC110101179 isoform X1 [Dendrobium catenatum]                     |
| gene-MA16_Dca003662 | probable 2-oxoglutarate-dependent dioxygenase AOP1 [Dendrobium catenatum]                  |
| gene-MA16_Dca024404 | uncharacterized protein LOC110111870 [Dendrobium catenatum]                                |
| gene-MA16_Dca005980 | uncharacterized protein LOC110110813 [Dendrobium catenatum]                                |
| gene-MA16_Dca026139 | auxin response factor 18-like isoform X2 [Dendrobium catenatum]                            |
| gene-MA16_Dca020534 | protein TPX2 [Dendrobium catenatum]                                                        |
| gene-MA16_Dca016479 | anthranilate O-methyltransferase 1-like [Dendrobium catenatum]                             |

|                     |                                                                                      |
|---------------------|--------------------------------------------------------------------------------------|
| gene-MA16_Dca004477 | Putative pentatricopeptide repeat-containing protein [Dendrobium catenatum]          |
| gene-MA16_Dca025400 | Polygalacturonase inhibitor [Dendrobium catenatum]                                   |
| gene-MA16_Dca012863 | uncharacterized protein LOC110108917 [Dendrobium catenatum]                          |
| gene-MA16_Dca017578 | putative S-acyltransferase [Dendrobium catenatum]                                    |
| gene-MA16_Dca000609 | enhancer of mRNA-decapping protein 4-like [Dendrobium catenatum]                     |
| gene-MA16_Dca010322 | 60S ribosomal protein L4-1-like [Dendrobium catenatum]                               |
| gene-MA16_Dca028712 | hypothetical protein MA16_Dca028712 [Dendrobium catenatum]                           |
| gene-MA16_Dca004486 | hypothetical protein MA16_Dca004486 [Dendrobium catenatum]                           |
| gene-MA16_Dca012560 | uncharacterized protein LOC110099068 isoform X2 [Dendrobium catenatum]               |
| gene-MA16_Dca011528 | receptor-like serine/threonine-protein kinase ALE2 isoform X2 [Dendrobium catenatum] |
| gene-MA16_Dca026280 | uncharacterized protein LOC110110575 [Dendrobium catenatum]                          |
| gene-MA16_Dca015852 | hypothetical protein MA16_Dca015852 [Dendrobium catenatum]                           |
| gene-MA16_Dca001020 | hypothetical protein MA16_Dca001020 [Dendrobium catenatum]                           |
| gene-MA16_Dca011712 | hypothetical protein MA16_Dca011712 [Dendrobium catenatum]                           |
| gene-MA16_Dca012677 | U-box domain-containing protein 52-like [Dendrobium catenatum]                       |
| gene-MA16_Dca011682 | Disease resistance protein RGA2 [Dendrobium catenatum]                               |
| gene-MA16_Dca011476 | hypothetical protein MA16_Dca011476 [Dendrobium catenatum]                           |
| gene-MA16_Dca012338 | Superoxide dismutase [Cu-Zn], chloroplastic [Dendrobium catenatum]                   |
| gene-MA16_Dca008376 | uncharacterized protein LOC110099989 [Dendrobium catenatum]                          |
| gene-MA16_Dca012890 | cytochrome P450 84A1 [Dendrobium catenatum]                                          |
| gene-MA16_Dca023239 | probable glycosyltransferase 2 [Dendrobium catenatum]                                |
| gene-MA16_Dca003039 | uncharacterized protein LOC110108544 isoform X1 [Dendrobium catenatum]               |
| gene-MA16_Dca019516 | hypothetical protein MA16_Dca019516 [Dendrobium catenatum]                           |
| gene-MA16_Dca015612 | putative 1-phosphatidylinositol-3-phosphate 5-kinase FAB1C [Dendrobium catenatum]    |
| gene-MA16_Dca013972 | uncharacterized protein LOC110104431 [Dendrobium catenatum]                          |
| gene-MA16_Dca006829 | uncharacterized protein LOC110092461 [Dendrobium catenatum]                          |
| gene-MA16_Dca002597 | transformation/transcription domain-associated protein-like [Dendrobium catenatum]   |
| gene-MA16_Dca016667 | Retrovirus-related Pol polyprotein from transposon TNT 1-94 [Dendrobium catenatum]   |
| gene-MA16_Dca002789 | uncharacterized protein LOC110097862 [Dendrobium catenatum]                          |
| gene-MA16_Dca015044 | Isopentenyl-diphosphate Delta-isomerase I [Dendrobium catenatum]                     |



|                     |                                                                                    |
|---------------------|------------------------------------------------------------------------------------|
| gene-MA16_Dca016470 | transcription factor bHLH130-like [Dendrobium catenatum]                           |
| gene-MA16_Dca018027 | uncharacterized protein LOC110100879 [Dendrobium catenatum]                        |
| gene-MA16_Dca005243 | Diaminopimelate epimerase, chloroplastic [Dendrobium catenatum]                    |
| gene-MA16_Dca007583 | gamma-interferon-inducible-lysosomal thiol reductase-like [Dendrobium catenatum]   |
| gene-MA16_Dca013957 | eukaryotic translation initiation factor 4B1-like [Dendrobium catenatum]           |
| gene-MA16_Dca017986 | putative plastid-lipid-associated protein 8, chloroplastic [Dendrobium catenatum]  |
| gene-MA16_Dca023863 | hypothetical protein MA16_Dca023863 [Dendrobium catenatum]                         |
| gene-MA16_Dca011594 | Transcription factor HBP-1b(c38) [Dendrobium catenatum]                            |
| gene-MA16_Dca017455 | Chaperone protein dnaJ 1, mitochondrial [Dendrobium catenatum]                     |
| gene-MA16_Dca014023 | replication protein A 70 kDa DNA-binding subunit B [Dendrobium catenatum]          |
| gene-MA16_Dca010352 | Retrovirus-related Pol polyprotein from transposon TNT 1-94 [Dendrobium catenatum] |
| gene-MA16_Dca007240 | flavin-containing monooxygenase FMO GS-OX5-like isoform X1 [Dendrobium catenatum]  |
| gene-MA16_Dca021525 | hypothetical protein MA16_Dca021525 [Dendrobium catenatum]                         |
| gene-MA16_Dca010194 | putative E3 ubiquitin-protein ligase UBR7 [Dendrobium catenatum]                   |
| gene-MA16_Dca027552 | hypothetical protein MA16_Dca027552 [Dendrobium catenatum]                         |
| gene-MA16_Dca024114 | BTB/POZ domain-containing protein POB1-like [Dendrobium catenatum]                 |
| gene-MA16_Dca018152 | phospholipid-transporting ATPase 1-like [Dendrobium catenatum]                     |
| gene-MA16_Dca028558 | hypothetical protein MA16_Dca028558 [Dendrobium catenatum]                         |
| gene-MA16_Dca004708 | Retrovirus-related Pol polyprotein from transposon TNT 1-94 [Dendrobium catenatum] |
| gene-MA16_Dca014400 | methionyl-tRNA formyltransferase [Dendrobium catenatum]                            |
| gene-MA16_Dca026575 | mannose-specific lectin-like [Dendrobium catenatum]                                |
| gene-MA16_Dca001276 | Leucine aminopeptidase 2, chloroplastic [Dendrobium catenatum]                     |
| gene-MA16_Dca014079 | hypothetical protein MA16_Dca014079 [Dendrobium catenatum]                         |
| gene-MA16_Dca022332 | hypothetical protein MA16_Dca022332 [Dendrobium catenatum]                         |
| gene-MA16_Dca003665 | Nitrate transporter 1.3 [Dendrobium catenatum]                                     |
| gene-MA16_Dca000326 | calmodulin-binding protein 60 C-like [Dendrobium catenatum]                        |
| gene-MA16_Dca023056 | Retrovirus-related Pol polyprotein from transposon TNT 1-94 [Dendrobium catenatum] |
| gene-MA16_Dca006834 | hypothetical protein MA16_Dca006834 [Dendrobium catenatum]                         |
| gene-MA16_Dca006592 | Retrovirus-related Pol polyprotein from transposon TNT 1-94 [Dendrobium catenatum] |
| gene-MA16_Dca012833 | Retrovirus-related Pol polyprotein from transposon TNT 1-94 [Dendrobium catenatum] |

|                     |                                                                             |
|---------------------|-----------------------------------------------------------------------------|
| gene-MA16_Dca015409 | MLO-like protein 1 [Dendrobium catenatum]                                   |
| gene-MA16_Dca021332 | hypothetical protein MA16_Dca021332 [Dendrobium catenatum]                  |
| gene-MA16_Dca010130 | cytochrome P450 704C1-like isoform X1 [Dendrobium catenatum]                |
| gene-MA16_Dca002326 | uncharacterized protein LOC110110061 [Dendrobium catenatum]                 |
| gene-MA16_Dca000984 | Transcription factor GAMYB [Dendrobium catenatum]                           |
| gene-MA16_Dca005204 | hypothetical protein MA16_Dca005204 [Dendrobium catenatum]                  |
| gene-MA16_Dca007315 | hypothetical protein MA16_Dca007315 [Dendrobium catenatum]                  |
| gene-MA16_Dca018411 | hypothetical protein MA16_Dca018411 [Dendrobium catenatum]                  |
| gene-MA16_Dca019205 | F-box/kelch-repeat protein At5g42350-like [Dendrobium catenatum]            |
| gene-MA16_Dca022051 | beta-amylase 8 isoform X1 [Dendrobium catenatum]                            |
| gene-MA16_Dca024152 | uncharacterized protein LOC110112086 [Dendrobium catenatum]                 |
| gene-MA16_Dca011647 | hypothetical protein MA16_Dca011647 [Dendrobium catenatum]                  |
| gene-MA16_Dca002803 | uncharacterized protein LOC110097748 [Dendrobium catenatum]                 |
| gene-MA16_Dca010411 | putative UPF0496 protein 2 [Dendrobium catenatum]                           |
| gene-MA16_Dca018115 | BTB/POZ domain-containing protein NPY2 [Dendrobium catenatum]               |
| gene-MA16_Dca005914 | hypothetical protein MA16_Dca005914 [Dendrobium catenatum]                  |
| gene-MA16_Dca004189 | Protein FAR1-RELATED SEQUENCE 5 [Dendrobium catenatum]                      |
| gene-MA16_Dca003840 | hypothetical protein MA16_Dca003840 [Dendrobium catenatum]                  |
| gene-MA16_Dca013403 | putative clathrin assembly protein At5g35200 [Dendrobium catenatum]         |
| gene-MA16_Dca021670 | serine/threonine-protein kinase EDR1-like isoform X1 [Dendrobium catenatum] |
| gene-MA16_Dca012501 | Centromere/kinetochore protein zw10 like [Dendrobium catenatum]             |
| gene-MA16_Dca013337 | floral homeotic protein APETALA 2-like isoform X1 [Dendrobium catenatum]    |
| gene-MA16_Dca010934 | Mitogen-activated protein kinase kinase kinase YODA [Dendrobium catenatum]  |
| gene-MA16_Dca016882 | hypothetical protein MA16_Dca016882 [Dendrobium catenatum]                  |
| gene-MA16_Dca019758 | protein AE7-like 1 [Dendrobium catenatum]                                   |
| gene-MA16_Dca013779 | probable RNA helicase SDE3 [Dendrobium catenatum]                           |
| gene-MA16_Dca009269 | glycylpeptide N-tetradecanoyltransferase 1-like [Dendrobium catenatum]      |
| gene-MA16_Dca018822 | MATE efflux family protein 9 [Dendrobium catenatum]                         |
| gene-MA16_Dca000122 | peroxidase P7-like [Dendrobium catenatum]                                   |
| gene-MA16_Dca013592 | uncharacterized protein LOC110103622 [Dendrobium catenatum]                 |

|                     |                                                                                      |
|---------------------|--------------------------------------------------------------------------------------|
| gene-MA16_Dca013460 | hypothetical protein MA16_Dca013460 [Dendrobium catenatum]                           |
| gene-MA16_Dca006631 | DNA helicase INO80 [Dendrobium catenatum]                                            |
| gene-MA16_Dca015210 | hypothetical protein MA16_Dca015210 [Dendrobium catenatum]                           |
| gene-MA16_Dca018870 | hypothetical protein MA16_Dca018870 [Dendrobium catenatum]                           |
| gene-MA16_Dca012151 | hypothetical protein MA16_Dca012151 [Dendrobium catenatum]                           |
| gene-MA16_Dca024232 | receptor-like protein kinase HSL1 [Dendrobium catenatum]                             |
| gene-MA16_Dca021289 | MATE efflux family protein 5 [Dendrobium catenatum]                                  |
| gene-MA16_Dca020386 | hypothetical protein MA16_Dca020386 [Dendrobium catenatum]                           |
| gene-MA16_Dca017938 | uncharacterized protein LOC110108861 [Dendrobium catenatum]                          |
| gene-MA16_Dca016060 | chaperone protein dnaJ 16-like [Dendrobium catenatum]                                |
| gene-MA16_Dca008999 | suppressor of RPS4-RLD 1 isoform X1 [Dendrobium catenatum]                           |
| gene-MA16_Dca020663 | type I inositol polyphosphate 5-phosphatase 1-like isoform X1 [Dendrobium catenatum] |
| gene-MA16_Dca024573 | Uncharacterized protein MA16_Dca024573 [Dendrobium catenatum]                        |
| gene-MA16_Dca011783 | hypothetical protein MA16_Dca011783 [Dendrobium catenatum]                           |
| gene-MA16_Dca024109 | Retrovirus-related Pol polyprotein from transposon TNT 1-94 [Dendrobium catenatum]   |
| gene-MA16_Dca015244 | Laccase-14 [Dendrobium catenatum]                                                    |
| gene-MA16_Dca011374 | putative glycosyltransferase [Dendrobium catenatum]                                  |
| gene-MA16_Dca017326 | Pentatricopeptide repeat-containing protein [Dendrobium catenatum]                   |
| gene-MA16_Dca025897 | cycloartenol synthase [Dendrobium catenatum]                                         |
| gene-MA16_Dca013465 | Putative disease resistance protein RGA4 [Dendrobium catenatum]                      |
| gene-MA16_Dca003471 | probable lysophospholipase BODYGUARD 3 [Dendrobium catenatum]                        |
| gene-MA16_Dca023138 | Putative disease resistance RPP13-like protein 1 [Dendrobium catenatum]              |
| gene-MA16_Dca020497 | UV-stimulated scaffold protein A homolog [Dendrobium catenatum]                      |
| gene-MA16_Dca007049 | transcription factor LHW-like isoform X1 [Dendrobium catenatum]                      |
| gene-MA16_Dca009502 | hypothetical protein MA16_Dca009502 [Dendrobium catenatum]                           |
| gene-MA16_Dca009078 | hypothetical protein MA16_Dca009078 [Dendrobium catenatum]                           |
| gene-MA16_Dca003297 | cytochrome P450 71A1-like [Dendrobium catenatum]                                     |
| gene-MA16_Dca004642 | protein PNS1 [Dendrobium catenatum]                                                  |
| gene-MA16_Dca006688 | hypothetical protein MA16_Dca006688 [Dendrobium catenatum]                           |
| gene-MA16_Dca024704 | hypothetical protein MA16_Dca024704 [Dendrobium catenatum]                           |

|                     |                                                                                    |
|---------------------|------------------------------------------------------------------------------------|
| gene-MA16_Dca002484 | Disease resistance protein RGA2 [Dendrobium catenatum]                             |
| gene-MA16_Dca013620 | WPP domain-interacting protein 1 [Dendrobium catenatum]                            |
| gene-MA16_Dca015500 | Pentatricopeptide repeat-containing protein [Dendrobium catenatum]                 |
| gene-MA16_Dca028061 | Retrovirus-related Pol polyprotein from transposon TNT 1-94 [Dendrobium catenatum] |
| gene-MA16_Dca017878 | uncharacterized protein LOC110114295 [Dendrobium catenatum]                        |
| gene-MA16_Dca011965 | probable E3 ubiquitin-protein ligase RNF144A-B isoform X1 [Dendrobium catenatum]   |
| gene-MA16_Dca013600 | cullin-associated NEDD8-dissociated protein 1 [Dendrobium catenatum]               |
| gene-MA16_Dca004102 | uncharacterized protein C6G9.01c [Dendrobium catenatum]                            |
| gene-MA16_Dca000350 | SCAR-like protein 2 [Dendrobium catenatum]                                         |
| gene-MA16_Dca015205 | zinc finger protein ZAT1-like [Dendrobium catenatum]                               |
| gene-MA16_Dca003931 | uncharacterized protein LOC110110813 [Dendrobium catenatum]                        |
| gene-MA16_Dca001796 | ribosomal RNA small subunit methyltransferase [Dendrobium catenatum]               |
| gene-MA16_Dca001920 | putative protein phosphatase 2C 4 [Dendrobium catenatum]                           |
| gene-MA16_Dca017029 | RNA-directed DNA polymerase [Dendrobium catenatum]                                 |
| gene-MA16_Dca021852 | uncharacterized protein LOC110113946 [Dendrobium catenatum]                        |
| gene-MA16_Dca011516 | hypothetical protein MA16_Dca011516 [Dendrobium catenatum]                         |
| gene-MA16_Dca000945 | hypothetical protein MA16_Dca000945 [Dendrobium catenatum]                         |
| gene-MA16_Dca022812 | protease Do-like 7 isoform X2 [Dendrobium catenatum]                               |
| gene-MA16_Dca020312 | venom phosphodiesterase 2-like [Dendrobium catenatum]                              |
| gene-MA16_Dca026778 | Nodulation-signaling pathway 2 protein [Dendrobium catenatum]                      |
| gene-MA16_Dca001352 | receptor-like kinase TMK4 [Dendrobium catenatum]                                   |
| gene-MA16_Dca002782 | dof zinc finger protein DOF2.1-like [Dendrobium catenatum]                         |
| gene-MA16_Dca025304 | Premnaspirodiene oxygenase [Dendrobium catenatum]                                  |
| gene-MA16_Dca003942 | hypothetical protein MA16_Dca003942 [Dendrobium catenatum]                         |
| gene-MA16_Dca026216 | Lecithin-cholesterol acyltransferase-like 1 [Dendrobium catenatum]                 |
| gene-MA16_Dca009483 | chlorophyll a-b binding protein CP29.1, chloroplastic-like [Dendrobium catenatum]  |
| gene-MA16_Dca007629 | protein NETWORKED 4B-like [Dendrobium catenatum]                                   |
| gene-MA16_Dca015676 | Retrovirus-related Pol polyprotein from transposon TNT 1-94 [Dendrobium catenatum] |
| gene-MA16_Dca014991 | Protein MOR1 [Dendrobium catenatum]                                                |
| gene-MA16_Dca015294 | hypothetical protein MA16_Dca015294 [Dendrobium catenatum]                         |

|                     |                                                                                                  |
|---------------------|--------------------------------------------------------------------------------------------------|
| gene-MA16_Dca009670 | 60S ribosomal protein L15-1 [Dendrobium catenatum]                                               |
| gene-MA16_Dca028455 | hypothetical protein MA16_Dca028455 [Dendrobium catenatum]                                       |
| gene-MA16_Dca022444 | hypothetical protein MA16_Dca022444 [Dendrobium catenatum]                                       |
| gene-MA16_Dca027734 | DNA-directed RNA polymerase II subunit RPB7 [Dendrobium catenatum]                               |
| gene-MA16_Dca025030 | RAN GTPase-activating protein 1 [Dendrobium catenatum]                                           |
| gene-MA16_Dca028065 | transcription factor GAMYB-like [Dendrobium catenatum]                                           |
| gene-MA16_Dca018325 | vacuolar protein sorting-associated protein 51 homolog [Dendrobium catenatum]                    |
| gene-MA16_Dca012188 | Formin-like protein 12 [Dendrobium catenatum]                                                    |
| gene-MA16_Dca014524 | hypothetical protein MA16_Dca014524 [Dendrobium catenatum]                                       |
| gene-MA16_Dca003896 | hypothetical protein MA16_Dca003896 [Dendrobium catenatum]                                       |
| gene-MA16_Dca024692 | uncharacterized protein LOC110098342 [Dendrobium catenatum]                                      |
| gene-MA16_Dca015722 | pentatricopeptide repeat-containing protein At5g48910-like [Dendrobium catenatum]                |
| gene-MA16_Dca000100 | Cellulose synthase A catalytic subunit 9 [UDP-forming] [Dendrobium catenatum]                    |
| gene-MA16_Dca015255 | F-box only protein 6 isoform X3 [Dendrobium catenatum]                                           |
| gene-MA16_Dca012928 | squamosa promoter-binding-like protein 10 [Dendrobium catenatum]                                 |
| gene-MA16_Dca013019 | hypothetical protein MA16_Dca013019 [Dendrobium catenatum]                                       |
| gene-MA16_Dca014423 | uncharacterized protein LOC110116116 [Dendrobium catenatum]                                      |
| gene-MA16_Dca003302 | pentatricopeptide repeat-containing protein At3g24000, mitochondrial-like [Dendrobium catenatum] |
| gene-MA16_Dca026212 | amino acid permease 3-like [Dendrobium catenatum]                                                |
| gene-MA16_Dca008938 | transcriptional regulator ATRX homolog [Dendrobium catenatum]                                    |
| gene-MA16_Dca018091 | Putative disease resistance protein RGA1 [Dendrobium catenatum]                                  |
| gene-MA16_Dca003428 | RING-H2 finger protein ATL1 [Dendrobium catenatum]                                               |
| gene-MA16_Dca015910 | target of Myb protein 1-like [Dendrobium catenatum]                                              |
| gene-MA16_Dca013529 | transcription factor GTE9-like [Dendrobium catenatum]                                            |
| gene-MA16_Dca019322 | probable polygalacturonase [Dendrobium catenatum]                                                |
| gene-MA16_Dca000459 | 21 kDa protein [Dendrobium catenatum]                                                            |
| gene-MA16_Dca014626 | pentatricopeptide repeat-containing protein MRL1, chloroplastic [Dendrobium catenatum]           |
| gene-MA16_Dca023064 | cytochrome b6-f complex iron-sulfur subunit, chloroplastic [Dendrobium catenatum]                |
| gene-MA16_Dca013128 | hypothetical protein MA16_Dca013128 [Dendrobium catenatum]                                       |
| gene-MA16_Dca007967 | hypothetical protein MA16_Dca007967 [Dendrobium catenatum]                                       |

|                     |                                                                                      |
|---------------------|--------------------------------------------------------------------------------------|
| gene-MA16_Dca017663 | Disease resistance protein RPM1 [Dendrobium catenatum]                               |
| gene-MA16_Dca020435 | pectinesterase-like [Dendrobium catenatum]                                           |
| gene-MA16_Dca011409 | uncharacterized protein LOC110110224 [Dendrobium catenatum]                          |
| gene-MA16_Dca019463 | mitochondrial phosphate carrier protein 3, mitochondrial-like [Dendrobium catenatum] |
| gene-MA16_Dca007257 | Retrovirus-related Pol polyprotein from transposon TNT 1-94 [Dendrobium catenatum]   |
| gene-MA16_Dca000889 | uncharacterized protein LOC110096393 [Dendrobium catenatum]                          |
| gene-MA16_Dca010381 | probable metal-nicotianamine transporter YSL9 [Dendrobium catenatum]                 |
| gene-MA16_Dca020207 | MATE efflux family protein DTX1 [Dendrobium catenatum]                               |
| gene-MA16_Dca014822 | Ribulose biphosphate carboxylase large chain [Dendrobium catenatum]                  |
| gene-MA16_Dca016750 | PHD finger protein ALFIN-LIKE 3 [Dendrobium catenatum]                               |
| gene-MA16_Dca004126 | Retrovirus-related Pol polyprotein from transposon TNT 1-94 [Dendrobium catenatum]   |
| gene-MA16_Dca021924 | uncharacterized protein LOC110116047 [Dendrobium catenatum]                          |
| gene-MA16_Dca014378 | ABC transporter G family member 42-like [Dendrobium catenatum]                       |
| gene-MA16_Dca017403 | hypothetical protein MA16_Dca017403 [Dendrobium catenatum]                           |
| gene-MA16_Dca025118 | hypothetical protein MA16_Dca025118 [Dendrobium catenatum]                           |
| gene-MA16_Dca023553 | squamosa promoter-binding-like protein 1 [Dendrobium catenatum]                      |
| gene-MA16_Dca004173 | Putative disease resistance protein RGA4 [Dendrobium catenatum]                      |
| gene-MA16_Dca019925 | Retrovirus-related Pol polyprotein from transposon TNT 1-94 [Dendrobium catenatum]   |
| gene-MA16_Dca011525 | NDR1/HIN1-like protein 13 [Dendrobium catenatum]                                     |
| gene-MA16_Dca007347 | E3 ubiquitin-protein ligase [Dendrobium catenatum]                                   |
| gene-MA16_Dca019488 | plant-specific TFIIB-related protein PTF2 [Dendrobium catenatum]                     |
| gene-MA16_Dca012831 | RNA-directed DNA polymerase [Dendrobium catenatum]                                   |
| gene-MA16_Dca017354 | putative aldo-keto reductase 2 [Dendrobium catenatum]                                |
| gene-MA16_Dca009169 | transmembrane protein 56-like isoform X1 [Dendrobium catenatum]                      |
| gene-MA16_Dca026606 | uncharacterized protein LOC110101272 [Dendrobium catenatum]                          |
| gene-MA16_Dca009868 | dof zinc finger protein DOF1.8-like [Dendrobium catenatum]                           |
| gene-MA16_Dca025367 | HBS1-like protein isoform X2 [Dendrobium catenatum]                                  |
| gene-MA16_Dca012698 | putative receptor-like protein kinase [Dendrobium catenatum]                         |
| gene-MA16_Dca003260 | agmatine coumaroyltransferase-1-like [Dendrobium catenatum]                          |
| gene-MA16_Dca013202 | peroxisome biogenesis protein 19-2-like [Dendrobium catenatum]                       |

|                     |                                                                                    |
|---------------------|------------------------------------------------------------------------------------|
| gene-MA16_Dca012286 | Proline-rich receptor-like protein kinase PERK13 [Dendrobium catenatum]            |
| gene-MA16_Dca004586 | uncharacterized protein LOC110093827 isoform X2 [Dendrobium catenatum]             |
| gene-MA16_Dca025576 | hypothetical protein MA16_Dca025576 [Dendrobium catenatum]                         |
| gene-MA16_Dca024053 | 50S ribosomal protein L14, chloroplastic [Dendrobium catenatum]                    |
| gene-MA16_Dca021072 | hypothetical protein MA16_Dca021072 [Dendrobium catenatum]                         |
| gene-MA16_Dca019230 | fasciclin-like arabinogalactan protein 9 [Dendrobium catenatum]                    |
| gene-MA16_Dca020910 | hypothetical protein MA16_Dca020910 [Dendrobium catenatum]                         |
| gene-MA16_Dca004251 | putative NOT transcription complex subunit VIP2 [Dendrobium catenatum]             |
| gene-MA16_Dca022317 | hypothetical protein MA16_Dca022317 [Dendrobium catenatum]                         |
| gene-MA16_Dca014554 | hypothetical protein MA16_Dca014554 [Dendrobium catenatum]                         |
| gene-MA16_Dca020331 | metal tolerance protein 1-like [Dendrobium catenatum]                              |
| gene-MA16_Dca000613 | hypothetical protein MA16_Dca000613 [Dendrobium catenatum]                         |
| gene-MA16_Dca002242 | putative helicase MAGATAMA 3 [Dendrobium catenatum]                                |
| gene-MA16_Dca021867 | uncharacterized protein LOC110113937 [Dendrobium catenatum]                        |
| gene-MA16_Dca019194 | putative Ufm1-specific protease [Dendrobium catenatum]                             |
| gene-MA16_Dca001220 | Methyltransferase-like protein 2 [Dendrobium catenatum]                            |
| gene-MA16_Dca013655 | hypothetical protein MA16_Dca013655 [Dendrobium catenatum]                         |
| gene-MA16_Dca003285 | ATP sulfurylase 1, chloroplastic-like [Dendrobium catenatum]                       |
| gene-MA16_Dca009484 | protein trichome birefringence-like 19 [Dendrobium catenatum]                      |
| gene-MA16_Dca002926 | Putative ribonuclease H protein [Dendrobium catenatum]                             |
| gene-MA16_Dca008031 | hypothetical protein MA16_Dca008031 [Dendrobium catenatum]                         |
| gene-MA16_Dca002476 | hypothetical protein MA16_Dca002476 [Dendrobium catenatum]                         |
| gene-MA16_Dca026695 | 125 kDa kinesin-related protein [Dendrobium catenatum]                             |
| gene-MA16_Dca010444 | Protein LONGIFOLIA 1 [Dendrobium catenatum]                                        |
| gene-MA16_Dca003498 | hypothetical protein MA16_Dca003498 [Dendrobium catenatum]                         |
| gene-MA16_Dca009093 | transcriptional repressor ILP1 [Dendrobium catenatum]                              |
| gene-MA16_Dca011564 | hypothetical protein MA16_Dca011564 [Dendrobium catenatum]                         |
| gene-MA16_Dca026803 | MADS-box transcription factor 22 [Dendrobium catenatum]                            |
| gene-MA16_Dca011035 | Transcription factor GAMYB [Dendrobium catenatum]                                  |
| gene-MA16_Dca019334 | Retrovirus-related Pol polyprotein from transposon TNT 1-94 [Dendrobium catenatum] |

|                     |                                                                                             |
|---------------------|---------------------------------------------------------------------------------------------|
| gene-MA16_Dca005346 | Uncharacterized protein MA16_Dca005346 [Dendrobium catenatum]                               |
| gene-MA16_Dca010163 | Syntaxin-112 [Dendrobium catenatum]                                                         |
| gene-MA16_Dca012062 | Protein UNUSUAL FLORAL ORGANS [Dendrobium catenatum]                                        |
| gene-MA16_Dca012896 | Receptor-like protein kinase [Dendrobium catenatum]                                         |
| gene-MA16_Dca005436 | polyadenylation and cleavage factor homolog 4 isoform X2 [Dendrobium catenatum]             |
| gene-MA16_Dca021773 | hypothetical protein MA16_Dca021773 [Dendrobium catenatum]                                  |
| gene-MA16_Dca010123 | pentatricopeptide repeat-containing protein At2g36980, mitochondrial [Dendrobium catenatum] |
| gene-MA16_Dca003714 | hypothetical protein MA16_Dca003714 [Dendrobium catenatum]                                  |
| gene-MA16_Dca022381 | hypothetical protein MA16_Dca022381 [Dendrobium catenatum]                                  |
| gene-MA16_Dca003078 | TPR repeat-containing thioredoxin TTL1 [Dendrobium catenatum]                               |
| gene-MA16_Dca008216 | hypothetical protein MA16_Dca008216 [Dendrobium catenatum]                                  |
| gene-MA16_Dca013867 | UPF0481 protein [Dendrobium catenatum]                                                      |
| gene-MA16_Dca000376 | Histone H1.2 [Dendrobium catenatum]                                                         |
| gene-MA16_Dca023769 | hypothetical protein MA16_Dca023769 [Dendrobium catenatum]                                  |
| gene-MA16_Dca023414 | putative pentatricopeptide repeat-containing protein At5g08490 [Dendrobium catenatum]       |
| gene-MA16_Dca011666 | probable F-box protein At2g36090 [Dendrobium catenatum]                                     |
| gene-MA16_Dca012030 | DEAD-box ATP-dependent RNA helicase ISE2, chloroplastic [Dendrobium catenatum]              |
| gene-MA16_Dca011565 | uncharacterized protein LOC110093805 [Dendrobium catenatum]                                 |
| gene-MA16_Dca004386 | hypothetical protein MA16_Dca004386 [Dendrobium catenatum]                                  |
| gene-MA16_Dca008729 | protein DWARF AND LOW-TILLERING-like [Dendrobium catenatum]                                 |
| gene-MA16_Dca005154 | sodium-coupled neutral amino acid transporter 2-like isoform X1 [Dendrobium catenatum]      |
| gene-MA16_Dca014326 | pathogenesis-related genes transcriptional activator PTI6-like [Dendrobium catenatum]       |
| gene-MA16_Dca006457 | hypothetical protein MA16_Dca006457 [Dendrobium catenatum]                                  |
| gene-MA16_Dca000619 | uncharacterized protein LOC110115684 [Dendrobium catenatum]                                 |
| gene-MA16_Dca000981 | uncharacterized protein LOC110103751 [Dendrobium catenatum]                                 |
| gene-MA16_Dca016865 | Valine--tRNA ligase [Dendrobium catenatum]                                                  |
| gene-MA16_Dca018659 | hypothetical protein MA16_Dca018659 [Dendrobium catenatum]                                  |
| gene-MA16_Dca027577 | hypothetical protein MA16_Dca027577 [Dendrobium catenatum]                                  |
| gene-MA16_Dca021684 | Pentatricopeptide repeat-containing protein [Dendrobium catenatum]                          |
| gene-MA16_Dca010749 | mRNA-capping enzyme [Dendrobium catenatum]                                                  |



gene-MA16\_Dca001201

hypothetical protein MA16\_Dca001201 [Dendrobium catenatum]

gene-MA16\_Dca011895

NDR1/HIN1-like protein 2 [Dendrobium catenatum]

gene-MA16\_Dca016967

hypothetical protein MA16\_Dca016967 [Dendrobium catenatum]

---
