# Supplementary material for: RNA sequencing-based exploration of the effects of far-red light on microRNAs involved in the shade-avoidance response of D. officinale
Source: PeerJ journal article supplement (doi:10.7717/peerj.15001), 2023-03-20
Supplement: Table_S14.pdf [file Table_S14.pdf]

Table S14 The Ct mean of DE miRNAs and genes in *D. officinale* under different light treatments

| Light treatment | novel_miR_53 | miR395b | miR399c | 5p miR399t | 3p novel_miR_36 | novel_miR_483 | novel_miR_390 | novel_miR_159 | novel_miR_178 | novel_miR_405 | 5.8 s rRNA |
|-----------------|--------------|---------|---------|------------|-----------------|---------------|---------------|---------------|---------------|---------------|------------|
|                 | Ct Mean      | Ct Mean | Ct Mean | Ct Mean    | Ct Mean         | Ct Mean       | Ct Mean       | Ct Mean       | Ct Mean       | Ct Mean       | Ct Mean    |
| CK-1            | 21.23        | 20.48   | 19.72   | 20.03      | 21.18           | 22.96         | 19.45         | 18.45         | 22.75         | 21.19         | 21.42      |
| CK-2            | 21.46        | 20.65   | 19.77   | 20.04      | 21.30           | 22.97         | 19.57         | 18.67         | 22.57         | 21.23         | 21.43      |
| CK-3            | 21.27        | 20.55   | 19.80   | 20.18      | 21.21           | 22.76         | 19.66         | 18.66         | 22.66         | 21.3          | 21.56      |
| FR2-1           | 22.83        | 21.42   | 18.07   | 19.54      | 22.96           | 20.33         | 24.41         | 20.21         | 22.21         | 20.12         | 21.03      |
| FR2-2           | 22.79        | 21.52   | 18.39   | 19.48      | 22.68           | 20.48         | 24.40         | 20.43         | 22.36         | 20.32         | 21.02      |
| FR2-3           | 22.37        | 21.47   | 18.36   | 19.51      | 22.89           | 20.31         | 24.61         | 20.45         | 22.35         | 20.23         | 21.11      |
| FR8-1           | 22.50        | 21.98   | 16.32   | 18.07      | 20.32           | 18.12         | 23.21         | 21.11         | 19.11         | 17.57         | 20.93      |
| FR8-2           | 22.48        | 21.80   | 16.37   | 18.04      | 20.27           | 18.23         | 23.34         | 21.34         | 19.16         | 17.67         | 20.97      |
| FR8-3           | 22.29        | 21.97   | 16.16   | 18.09      | 20.06           | 18.35         | 23.38         | 21.38         | 19.13         | 17.65         | 20.98      |

| Light treatment | <i>THF2</i> | <i>ASA 1</i> | <i>GGP1</i> | <i>CYP86B 1</i> | <i>YUCCA 2</i> | <i>HKT 11</i> | <i>DCL 2a</i> | <i>PHYA</i> | <i>PIF3</i> | <i>PIF4</i> | <i>SPA 1</i> | <i>Actin</i> |
|-----------------|-------------|--------------|-------------|-----------------|----------------|---------------|---------------|-------------|-------------|-------------|--------------|--------------|
|                 | Ct Mean     | Ct Mean      | Ct Mean     | Ct Mean         | Ct Mean        | Ct Mean       | Ct Mean       | Ct Mean     | Ct Mean     | Ct Mean     | Ct Mean      | Ct Mean      |
| CK-1            | 29.06       | 30.32        | 26.45       | 28.06           | 27.80          | 27.56         | 28.46         | 33.42       | 26.80       | 30.83       | 28.41        | 25.50        |
| CK-2            | 28.98       | 30.46        | 26.54       | 28.18           | 27.09          | 27.60         | 28.43         | 33.28       | 26.76       | 30.58       | 28.30        | 25.63        |
| CK-3            | 28.92       | 30.52        | 26.35       | 28.17           | 27.04          | 27.66         | 28.37         | 33.30       | 26.67       | 30.79       | 28.31        | 25.60        |
| FR2-1           | 25.02       | 30.54        | 26.33       | 30.21           | 24.87          | 24.42         | 27.61         | 33.07       | 24.25       | 28.45       | 26.98        | 25.03        |
| FR2-2           | 25.07       | 30.12        | 26.43       | 30.32           | 24.82          | 24.35         | 27.52         | 33.18       | 24.28       | 28.53       | 26.81        | 25.01        |
| FR2-3           | 25.10       | 30.26        | 26.32       | 30.18           | 24.63          | 24.57         | 27.66         | 32.87       | 24.26       | 28.58       | 26.80        | 25.00        |
| FR8-1           | 25.52       | 26.07        | 25.11       | 26.13           | 30.11          | 23.08         | 25.67         | 29.86       | 27.63       | 26.17       | 25.72        | 26.63        |
| FR8-2           | 25.43       | 26.18        | 25.32       | 26.08           | 30.23          | 23.16         | 25.53         | 29.84       | 27.78       | 26.25       | 25.83        | 26.53        |
| FR8-3           | 25.51       | 26.12        | 25.23       | 26.10           | 30.12          | 23.20         | 25.51         | 30.16       | 27.73       | 26.33       | 25.65        | 26.32        |
