# Supplementary material for: RNA sequencing-based exploration of the effects of far-red light on microRNAs involved in the shade-avoidance response of D. officinale
Source: PeerJ journal article supplement (doi:10.7717/peerj.15001), 2023-03-20
Supplement: Table_S15.pdf [file Table_S15.pdf]

Table S15 The relative expression of DE miRNAs and genes in *D. officinale* under different light treatments

| Light treatment | novel_miR_53        |      | miR395b            |      | miR399c_5p          |      | miR399t_3p         |      | novel_miR_36        |      | novel_miR_483       |      | novel_miR_390      |      | novel_miR_159       |      | novel_miR_178      |      | novel_miR_405       |      |
|-----------------|---------------------|------|--------------------|------|---------------------|------|--------------------|------|---------------------|------|---------------------|------|--------------------|------|---------------------|------|--------------------|------|---------------------|------|
|                 | Relative expression | SD   | Relative expressio | SD   | Relative expression | SD   | Relative expressio | SD   | Relative expression | SD   | Relative expression | SD   | Relative expressio | SD   | Relative expression | SD   | Relative expressio | SD   | Relative expression | SD   |
| CK              | 0.93                | 0.10 | 124.30             | 9.86 | 3.82                | 0.13 | 2.60               | 0.01 | 3.74                | 0.28 | 0.50                | 0.07 | 15.61              | 0.59 | 1.98                | 0.14 | 0.33               | 0.03 | 1.10                | 0.02 |
| FR2             | 0.26                | 0.06 | 54.46              | 2.83 | 15.82               | 1.83 | 6.04               | 0.25 | 1.60                | 0.15 | 3.13                | 0.29 | 1.08               | 0.05 | 1.11                | 0.09 | 0.84               | 0.05 | 2.63                | 0.20 |
| FR8             | 0.33                | 0.03 | 3.28               | 0.26 | 19.89               | 1.75 | 6.43               | 0.16 | 6.35                | 0.41 | 3.49                | 0.22 | 0.84               | 0.04 | 0.37                | 0.03 | 0.92               | 0.01 | 3.71                | 0.08 |

  

| Light treatment | <i>THF2</i>         |      | <i>ASA 1</i>       |      | <i>GGP1</i>         |      | <i>CYP86B1</i>     |      | <i>YUCCA 2</i>      |      | <i>HKT11</i>        |       | <i>DCL 2a</i>      |      | <i>PHYA</i>         |      | <i>PIF3</i>        |      | <i>PIF4</i>         |      | <i>SPA 1</i>        |      |
|-----------------|---------------------|------|--------------------|------|---------------------|------|--------------------|------|---------------------|------|---------------------|-------|--------------------|------|---------------------|------|--------------------|------|---------------------|------|---------------------|------|
|                 | Relative expression | SD   | Relative expressio | SD   | Relative expression | SD   | Relative expressio | SD   | Relative expression | SD   | Relative expression | SD    | Relative expressio | SD   | Relative expression | SD   | Relative expressio | SD   | Relative expression | SD   | Relative expression | SD   |
| CK              | 1.95                | 0.17 | 0.49               | 0.02 | 7.25                | 0.53 | 9.16               | 0.09 | 0.44                | 0.13 | 35.19               | 1.36  | 0.07               | 0.00 | 0.25                | 0.02 | 0.63               | 0.05 | 4.05                | 0.56 | 0.07                | 0.01 |
| FR2             | 8.85                | 0.32 | 1.01               | 0.14 | 7.86                | 0.35 | 5.93               | 0.31 | 1.03                | 0.09 | 152.37              | 12.14 | 0.14               | 0.01 | 0.85                | 0.09 | 1.46               | 0.02 | 9.04                | 0.49 | 0.23                | 0.01 |
| FR8             | 2.87                | 0.33 | 1.82               | 0.23 | 19.29               | 3.05 | 16.72              | 0.68 | 0.04                | 0.01 | 553.20              | 81.59 | 1.10               | 0.07 | 1.17                | 0.25 | 0.24               | 0.03 | 64.47               | 5.36 | 0.99                | 0.09 |
